# Supplementary material
Source: Elsevier journal article supplement (https://univ-rennes.hal.science/hal-01381135v1/file/mmc5.zip)
Supplement: mmc5 [file mmc5.zip]

Archive with 2 entries (2 files):
- checkcif_8-(BF4)2-THF.pdf
- 8-(BF4)2-THF.cif
