# Supplementary material
Source: Elsevier journal article supplement (https://univ-rennes.hal.science/hal-01381135v1/file/mmc5.zip)
Supplement: mmc5 [file mmc5.zip › 8-(BF4)2-THF.cif]

 
data_nzx03

# start Validation Reply Form
_vrf_PLAT213_nzx03
;
PROBLEM: Atom C76A            has ADP max/min Ratio .....       12.9 prolat
RESPONSE: The atom in question is part of a disordered phenyl ring.
;
# end Validation Reply Form
 
_audit_creation_method            SHELXL-2013
_chemical_name_systematic
;
 ?
;
_chemical_name_common             ?
_chemical_melting_point           ?
_chemical_formula_moiety          ?
_chemical_formula_sum
 'C135 H145 Ag3 B2 F8 O5 P8 Ru' 
_chemical_formula_weight          2693.56

loop_
 _atom_type_symbol
 _atom_type_description
 _atom_type_scat_dispersion_real
 _atom_type_scat_dispersion_imag
 _atom_type_scat_source
 'C'  'C'   0.0033   0.0016
 'International Tables Vol C Tables 4.2.6.8 and 6.1.1.4'
 'H'  'H'   0.0000   0.0000
 'International Tables Vol C Tables 4.2.6.8 and 6.1.1.4'
 'F'  'F'   0.0171   0.0103
 'International Tables Vol C Tables 4.2.6.8 and 6.1.1.4'
 'P'  'P'   0.1023   0.0942
 'International Tables Vol C Tables 4.2.6.8 and 6.1.1.4'
 'Ru'  'Ru'  -1.2594   0.8363
 'International Tables Vol C Tables 4.2.6.8 and 6.1.1.4'
 'Ag'  'Ag'  -0.8971   1.1015
 'International Tables Vol C Tables 4.2.6.8 and 6.1.1.4'
 'B'  'B'   0.0013   0.0007
 'International Tables Vol C Tables 4.2.6.8 and 6.1.1.4'
 'O'  'O'   0.0106   0.0060
 'International Tables Vol C Tables 4.2.6.8 and 6.1.1.4'
 
_space_group_crystal_system       triclinic
_space_group_IT_number            2
_space_group_name_H-M_alt         'P -1'
_space_group_name_Hall            '-P 1'
 
_shelx_space_group_comment
;
The symmetry employed for this shelxl refinement is uniquely defined
by the following loop, which should always be used as a source of
symmetry information in preference to the above space-group names.
They are only intended as comments.
;
 
loop_
 _space_group_symop_operation_xyz
 'x, y, z'
 '-x, -y, -z'
 
_cell_length_a                    18.5753(9)
_cell_length_b                    18.6769(9)
_cell_length_c                    20.2553(10)
_cell_angle_alpha                 83.513(4)
_cell_angle_beta                  85.582(4)
_cell_angle_gamma                 62.139(5)
_cell_volume                      6170.5(6)
_cell_formula_units_Z             2
_cell_measurement_temperature     150(2)
_cell_measurement_reflns_used   16990
_cell_measurement_theta_min     2.4575
_cell_measurement_theta_max     28.1436
 
_exptl_crystal_description        plate 
_exptl_crystal_colour             yellow 
_exptl_crystal_density_meas       ? 
_exptl_crystal_density_method     ?              
_exptl_crystal_density_diffrn     1.450          
_exptl_crystal_F_000              2764
_exptl_transmission_factor_min    ?                                             
_exptl_transmission_factor_max    ?                                             
_exptl_crystal_size_max           0.380
_exptl_crystal_size_mid           0.190
_exptl_crystal_size_min           0.040
_exptl_absorpt_coefficient_mu     0.759
_shelx_estimated_absorpt_T_min    0.761
_shelx_estimated_absorpt_T_max    0.970
_exptl_absorpt_correction_T_min                   0.82320
_exptl_absorpt_correction_T_max                   1.00000
_exptl_absorpt_correction_type            'multi-scan'
_exptl_absorpt_process_details
;
CrysAlisPro, Agilent Technologies,
Version 1.171.35.11 (release 16-05-2011 CrysAlis171 .NET)
(compiled May 16 2011,17:55:39)
Empirical absorption correction using spherical harmonics,
 implemented in SCALE3 ABSPACK scaling algorithm.
;
 
_exptl_special_details
;
 ?
;
 
_diffrn_ambient_temperature       150(2)
_diffrn_radiation_wavelength      0.71073
_diffrn_radiation_type            MoK\a
_diffrn_radiation_source 'Enhance (Mo) X-ray Source'
_diffrn_radiation_monochromator 'graphite'
_diffrn_measurement_device_type 'Xcalibur, Eos'
_diffrn_measurement_details
;
#__ type_ start__ end____ width___ exp.time_
  1 omega  -15.00   84.00   1.0000   92.0000
omega____ theta____ kappa____ phi______ frames
    -       16.2265   77.0000 -180.0000 99

#__ type_ start__ end____ width___ exp.time_
  2 omega    8.00   84.00   1.0000   92.0000
omega____ theta____ kappa____ phi______ frames
    -       16.2265   77.0000 -120.0000 76

#__ type_ start__ end____ width___ exp.time_
  3 omega    2.00   80.00   1.0000   92.0000
omega____ theta____ kappa____ phi______ frames
    -       16.2265   77.0000  -30.0000 78

#__ type_ start__ end____ width___ exp.time_
  4 omega  -30.00   47.00   1.0000   92.0000
omega____ theta____ kappa____ phi______ frames
    -      -17.0078   77.0000   90.0000 77

#__ type_ start__ end____ width___ exp.time_
  5 omega  -45.00   29.00   1.0000   92.0000
omega____ theta____ kappa____ phi______ frames
    -      -17.0078   77.0000   30.0000 74

#__ type_ start__ end____ width___ exp.time_
  6 omega  -56.00   44.00   1.0000   92.0000
omega____ theta____ kappa____ phi______ frames
    -       16.2265  -37.0000 -150.0000 100

#__ type_ start__ end____ width___ exp.time_
  7 omega  -15.00   87.00   1.0000   92.0000
omega____ theta____ kappa____ phi______ frames
    -       16.2265   77.0000   30.0000 102

#__ type_ start__ end____ width___ exp.time_
  8 omega   34.00   94.00   1.0000   92.0000
omega____ theta____ kappa____ phi______ frames
    -       16.2265  179.0000   90.0000 60

#__ type_ start__ end____ width___ exp.time_
  9 omega  -49.00   30.00   1.0000   92.0000
omega____ theta____ kappa____ phi______ frames
    -      -17.0078   77.0000  -90.0000 79

#__ type_ start__ end____ width___ exp.time_
 10 omega  -95.00  -32.00   1.0000   92.0000
omega____ theta____ kappa____ phi______ frames
    -      -17.0078  179.0000   60.0000 63

;
_diffrn_measurement_method '\w scans'
_diffrn_detector_area_resol_mean  16.1695 
_diffrn_reflns_number             93424
_diffrn_reflns_av_unetI/netI      0.0838
_diffrn_reflns_av_R_equivalents   0.0735
_diffrn_reflns_limit_h_min        -24
_diffrn_reflns_limit_h_max        23
_diffrn_reflns_limit_k_min        -24
_diffrn_reflns_limit_k_max        24
_diffrn_reflns_limit_l_min        -26
_diffrn_reflns_limit_l_max        25
_diffrn_reflns_theta_min          2.464
_diffrn_reflns_theta_max          28.219
_diffrn_reflns_theta_full         27.000
_diffrn_measured_fraction_theta_max   0.858
_diffrn_measured_fraction_theta_full  0.946
_diffrn_reflns_Laue_measured_fraction_max    0.858
_diffrn_reflns_Laue_measured_fraction_full   0.946
_diffrn_reflns_point_group_measured_fraction_max   0.858
_diffrn_reflns_point_group_measured_fraction_full  0.946
_reflns_number_total              26131
_reflns_number_gt                 17265
_reflns_threshold_expression      'I > 2\s(I)'
_reflns_Friedel_coverage          0.000
_reflns_Friedel_fraction_max      .
_reflns_Friedel_fraction_full     .
 
_reflns_special_details
;
 Reflections were merged by SHELXL according to the crystal
 class for the calculation of statistics and refinement.
 
 _reflns_Friedel_fraction is defined as the number of unique
 Friedel pairs measured divided by the number that would be
 possible theoretically, ignoring centric projections and
 systematic absences.
;
 
_computing_data_collection
;
CrysAlisPro, Agilent Technologies,
Version 1.171.35.11 (release 16-05-2011 CrysAlis171 .NET)
(compiled May 16 2011,17:55:39)
;
_computing_cell_refinement
;
CrysAlisPro, Agilent Technologies,
Version 1.171.35.11 (release 16-05-2011 CrysAlis171 .NET)
(compiled May 16 2011,17:55:39)
;
_computing_data_reduction
;
CrysAlisPro, Agilent Technologies,
Version 1.171.35.11 (release 16-05-2011 CrysAlis171 .NET)
(compiled May 16 2011,17:55:39)
;
_computing_structure_solution     'SHELXS-97 (Sheldrick, 1990)' 
_computing_structure_refinement   'SHELXL-2013 (Sheldrick, 2013)'
_computing_molecular_graphics     ?
_computing_publication_material   ?
 
_refine_special_details
;
 ?
;
_refine_ls_structure_factor_coef  Fsqd
_refine_ls_matrix_type            full
_refine_ls_weighting_scheme       calc
_refine_ls_weighting_details
'w=1/[\s^2^(Fo^2^)+(0.0613P)^2^+10.8661P] where P=(Fo^2^+2Fc^2^)/3'
_atom_sites_solution_primary      ?
_atom_sites_solution_secondary    ?
_atom_sites_solution_hydrogens    geom
_refine_ls_hydrogen_treatment     constr
_refine_ls_extinction_method      none
_refine_ls_extinction_coef        .
_refine_ls_number_reflns          26131
_refine_ls_number_parameters      1497
_refine_ls_number_restraints      11
_refine_ls_R_factor_all           0.1041
_refine_ls_R_factor_gt            0.0575
_refine_ls_wR_factor_ref          0.1518
_refine_ls_wR_factor_gt           0.1238
_refine_ls_goodness_of_fit_ref    1.044
_refine_ls_restrained_S_all       1.044
_refine_ls_shift/su_max           0.002
_refine_ls_shift/su_mean          0.000
 
loop_
 _atom_site_label
 _atom_site_type_symbol
 _atom_site_fract_x
 _atom_site_fract_y
 _atom_site_fract_z
 _atom_site_U_iso_or_equiv
 _atom_site_adp_type
 _atom_site_occupancy
 _atom_site_site_symmetry_order  
 _atom_site_calc_flag
 _atom_site_refinement_flags_posn
 _atom_site_refinement_flags_adp
 _atom_site_refinement_flags_occupancy
 _atom_site_disorder_assembly
 _atom_site_disorder_group
Ru1 Ru 0.35620(2) 0.15143(3) 0.68182(2) 0.02251(10) Uani 1 1 d . . . . .
C1 C 0.4517(3) 0.1570(3) 0.7128(2) 0.0253(11) Uani 1 1 d . . . . .
Ag3 Ag 0.75960(2) 0.11020(2) 0.69479(2) 0.02429(10) Uani 1 1 d . . . . .
C2 C 0.5146(3) 0.1561(3) 0.7296(2) 0.0263(11) Uani 1 1 d . . . . .
Ag4 Ag 0.72349(2) 0.09825(2) 0.85214(2) 0.02434(10) Uani 1 1 d . . . . .
C3 C 0.5844(3) 0.1554(3) 0.7466(2) 0.0223(11) Uani 1 1 d . . . . .
Ag5 Ag 0.66802(2) 0.26296(2) 0.77072(2) 0.02448(10) Uani 1 1 d . . . . .
C4 C 0.6473(3) 0.1544(3) 0.7622(2) 0.0233(11) Uani 1 1 d . . . . .
P5 P 0.29634(8) 0.20084(8) 0.78027(6) 0.0245(3) Uani 1 1 d . . . . .
C5 C 0.3063(3) 0.2937(3) 0.7857(3) 0.0280(12) Uani 1 1 d . . . . .
H5A H 0.2752 0.3218 0.8249 0.034 Uiso 1 1 calc R U . . .
H5B H 0.3642 0.2799 0.7899 0.034 Uiso 1 1 calc R U . . .
P6 P 0.30332(8) 0.28652(8) 0.64896(6) 0.0243(3) Uani 1 1 d . . . . .
C6 C 0.2724(3) 0.3484(3) 0.7217(2) 0.0294(12) Uani 1 1 d . . . . .
H6A H 0.2931 0.3889 0.7150 0.035 Uiso 1 1 calc R U . . .
H6B H 0.2122 0.3781 0.7255 0.035 Uiso 1 1 calc R U . . .
P7 P 0.66980(8) 0.34654(8) 0.66738(6) 0.0239(3) Uani 1 1 d . . . . .
C7 C 0.6699(3) 0.2998(3) 0.5926(2) 0.0254(11) Uani 1 1 d . . . . .
H7A H 0.6164 0.3008 0.5900 0.030 Uiso 1 1 calc R U . . .
H7B H 0.6764 0.3329 0.5530 0.030 Uiso 1 1 calc R U . . .
P8 P 0.75021(7) 0.19508(8) 0.59004(6) 0.0225(3) Uani 1 1 d . . . . .
P9 P 0.87624(7) -0.02643(8) 0.71003(6) 0.0241(3) Uani 1 1 d . . . . .
C9 C 0.9077(3) -0.0694(3) 0.7951(2) 0.0252(11) Uani 1 1 d . . . . .
H9A H 0.9435 -0.0482 0.8093 0.030 Uiso 1 1 calc R U . . .
H9B H 0.9404 -0.1291 0.7950 0.030 Uiso 1 1 calc R U . . .
P10 P 0.82335(8) -0.04714(8) 0.85652(6) 0.0236(3) Uani 1 1 d . . . . .
P11 P 0.69044(8) 0.16567(8) 0.95588(6) 0.0241(3) Uani 1 1 d . . . . .
C11 C 0.6914(3) 0.2646(3) 0.9478(2) 0.0276(12) Uani 1 1 d . . . . .
H11A H 0.6658 0.2930 0.9881 0.033 Uiso 1 1 calc R U . . .
H11B H 0.7486 0.2552 0.9445 0.033 Uiso 1 1 calc R U . . .
P12 P 0.63746(8) 0.32923(8) 0.87485(6) 0.0266(3) Uani 1 1 d . . . . .
C13 C 0.4320(3) 0.0629(3) 0.6076(3) 0.0313(12) Uani 1 1 d . . . . .
C14 C 0.4303(3) 0.0181(3) 0.6698(3) 0.0310(12) Uani 1 1 d . . . . .
C15 C 0.3490(3) 0.0326(3) 0.6847(3) 0.0287(12) Uani 1 1 d . . . . .
C16 C 0.2985(3) 0.0870(3) 0.6323(3) 0.0277(12) Uani 1 1 d . . . . .
C17 C 0.3510(3) 0.1050(3) 0.5848(3) 0.0294(12) Uani 1 1 d . . . . .
C18 C 0.5084(3) 0.0543(4) 0.5713(3) 0.0441(16) Uani 1 1 d . . . . .
H18A H 0.5390 -0.0007 0.5569 0.066 Uiso 1 1 calc R U . . .
H18B H 0.5417 0.0640 0.6009 0.066 Uiso 1 1 calc R U . . .
H18C H 0.4945 0.0941 0.5324 0.066 Uiso 1 1 calc R U . . .
C19 C 0.5048(4) -0.0406(4) 0.7077(3) 0.0467(16) Uani 1 1 d . . . . .
H19A H 0.4882 -0.0596 0.7504 0.070 Uiso 1 1 calc R U . . .
H19B H 0.5370 -0.0134 0.7156 0.070 Uiso 1 1 calc R U . . .
H19C H 0.5377 -0.0871 0.6819 0.070 Uiso 1 1 calc R U . . .
C20 C 0.3244(4) -0.0116(4) 0.7408(3) 0.0432(15) Uani 1 1 d . . . . .
H20A H 0.3515 -0.0699 0.7348 0.065 Uiso 1 1 calc R U . . .
H20B H 0.2653 0.0091 0.7414 0.065 Uiso 1 1 calc R U . . .
H20C H 0.3405 -0.0030 0.7830 0.065 Uiso 1 1 calc R U . . .
C21 C 0.2113(3) 0.1091(4) 0.6202(3) 0.0406(15) Uani 1 1 d . . . . .
H21A H 0.1804 0.1680 0.6097 0.061 Uiso 1 1 calc R U . . .
H21B H 0.1875 0.0928 0.6602 0.061 Uiso 1 1 calc R U . . .
H21C H 0.2093 0.0811 0.5829 0.061 Uiso 1 1 calc R U . . .
C22 C 0.3241(4) 0.1531(4) 0.5193(3) 0.0419(15) Uani 1 1 d . . . . .
H22A H 0.3610 0.1761 0.5040 0.063 Uiso 1 1 calc R U . . .
H22B H 0.2686 0.1972 0.5241 0.063 Uiso 1 1 calc R U . . .
H22C H 0.3251 0.1176 0.4867 0.063 Uiso 1 1 calc R U . . .
C23 C 0.3358(3) 0.1371(3) 0.8570(3) 0.0261(11) Uani 1 1 d . . . . .
C24 C 0.4116(3) 0.0687(3) 0.8571(3) 0.0368(14) Uani 1 1 d . . . . .
H24 H 0.4438 0.0563 0.8171 0.044 Uiso 1 1 calc R U . . .
C25 C 0.4406(4) 0.0185(4) 0.9149(3) 0.0446(15) Uani 1 1 d . . . . .
H25 H 0.4914 -0.0294 0.9136 0.054 Uiso 1 1 calc R U . . .
C26 C 0.3977(3) 0.0364(4) 0.9738(3) 0.0383(14) Uani 1 1 d . . . . .
H26 H 0.4184 0.0016 1.0131 0.046 Uiso 1 1 calc R U . . .
C27 C 0.3244(3) 0.1051(4) 0.9753(3) 0.0396(15) Uani 1 1 d . . . . .
H27 H 0.2948 0.1186 1.0163 0.048 Uiso 1 1 calc R U . . .
C28 C 0.2926(3) 0.1555(4) 0.9180(3) 0.0366(14) Uani 1 1 d . . . . .
H28 H 0.2413 0.2027 0.9200 0.044 Uiso 1 1 calc R U . . .
C29 C 0.1855(3) 0.2380(3) 0.7949(2) 0.0265(11) Uani 1 1 d . . . . .
C30 C 0.1527(3) 0.1895(4) 0.7777(3) 0.0325(13) Uani 1 1 d . . . . .
H30 H 0.1873 0.1378 0.7621 0.039 Uiso 1 1 calc R U . . .
C31 C 0.0692(3) 0.2171(4) 0.7834(3) 0.0338(13) Uani 1 1 d . . . . .
H31 H 0.0473 0.1834 0.7719 0.041 Uiso 1 1 calc R U . . .
C32 C 0.0179(3) 0.2910(4) 0.8051(3) 0.0432(16) Uani 1 1 d . . . . .
H32 H -0.0392 0.3091 0.8080 0.052 Uiso 1 1 calc R U . . .
C33 C 0.0499(3) 0.3392(4) 0.8229(3) 0.0401(15) Uani 1 1 d . . . . .
H33 H 0.0146 0.3908 0.8384 0.048 Uiso 1 1 calc R U . . .
C34 C 0.1337(3) 0.3127(3) 0.8183(3) 0.0329(13) Uani 1 1 d . . . . .
H34 H 0.1554 0.3460 0.8312 0.039 Uiso 1 1 calc R U . . .
C35 C 0.2099(3) 0.3291(3) 0.6008(3) 0.0264(11) Uani 1 1 d . . . . .
C36 C 0.1433(3) 0.3207(3) 0.6298(3) 0.0306(12) Uani 1 1 d . . . . .
H36 H 0.1456 0.2981 0.6745 0.037 Uiso 1 1 calc R U . . .
C37 C 0.0734(3) 0.3449(4) 0.5938(3) 0.0390(14) Uani 1 1 d . . . . .
H37 H 0.0284 0.3389 0.6139 0.047 Uiso 1 1 calc R U . . .
C38 C 0.0700(3) 0.3777(4) 0.5287(3) 0.0385(14) Uani 1 1 d . . . . .
H38 H 0.0227 0.3941 0.5038 0.046 Uiso 1 1 calc R U . . .
C39 C 0.1350(3) 0.3866(4) 0.5000(3) 0.0386(14) Uani 1 1 d . . . . .
H39 H 0.1325 0.4087 0.4551 0.046 Uiso 1 1 calc R U . . .
C40 C 0.2043(3) 0.3635(3) 0.5356(3) 0.0312(12) Uani 1 1 d . . . . .
H40 H 0.2483 0.3713 0.5154 0.037 Uiso 1 1 calc R U . . .
C41 C 0.3657(3) 0.3254(3) 0.5976(2) 0.0270(12) Uani 1 1 d . . . . .
C42 C 0.4406(3) 0.2700(4) 0.5720(3) 0.0349(13) Uani 1 1 d . . . . .
H42 H 0.4591 0.2133 0.5816 0.042 Uiso 1 1 calc R U . . .
C43 C 0.4883(4) 0.2979(5) 0.5322(3) 0.0463(17) Uani 1 1 d . . . . .
H43 H 0.5395 0.2604 0.5147 0.056 Uiso 1 1 calc R U . . .
C44 C 0.4611(4) 0.3802(5) 0.5184(3) 0.0533(19) Uani 1 1 d . . . . .
H44 H 0.4936 0.3993 0.4911 0.064 Uiso 1 1 calc R U . . .
C45 C 0.3866(4) 0.4353(4) 0.5439(3) 0.0500(17) Uani 1 1 d . . . . .
H45 H 0.3683 0.4920 0.5342 0.060 Uiso 1 1 calc R U . . .
C46 C 0.3387(3) 0.4079(4) 0.5838(3) 0.0371(14) Uani 1 1 d . . . . .
H46 H 0.2877 0.4456 0.6014 0.045 Uiso 1 1 calc R U . . .
C47 C 0.5709(3) 0.4383(3) 0.6644(2) 0.0273(11) Uani 1 1 d . . . . .
C48 C 0.5028(3) 0.4271(4) 0.6799(3) 0.0424(15) Uani 1 1 d . . . . .
H48 H 0.5081 0.3740 0.6900 0.051 Uiso 1 1 calc R U . . .
C49 C 0.4265(4) 0.4946(4) 0.6805(3) 0.0485(16) Uani 1 1 d . . . . .
H49 H 0.3797 0.4868 0.6903 0.058 Uiso 1 1 calc R U . . .
C50 C 0.4167(4) 0.5719(4) 0.6674(3) 0.0500(17) Uani 1 1 d . . . . .
H50 H 0.3641 0.6173 0.6695 0.060 Uiso 1 1 calc R U . . .
C51 C 0.4850(4) 0.5825(4) 0.6510(4) 0.0578(19) Uani 1 1 d . . . . .
H51 H 0.4794 0.6356 0.6399 0.069 Uiso 1 1 calc R U . . .
C52 C 0.5626(4) 0.5148(3) 0.6508(3) 0.0443(15) Uani 1 1 d . . . . .
H52 H 0.6095 0.5225 0.6411 0.053 Uiso 1 1 calc R U . . .
C53 C 0.7438(3) 0.3846(3) 0.6507(2) 0.0258(11) Uani 1 1 d . . . . .
C54 C 0.7627(3) 0.4091(3) 0.5870(3) 0.0375(14) Uani 1 1 d . . . . .
H54 H 0.7381 0.4037 0.5497 0.045 Uiso 1 1 calc R U . . .
C55 C 0.8169(4) 0.4410(4) 0.5777(3) 0.0455(16) Uani 1 1 d . . . . .
H55 H 0.8294 0.4576 0.5341 0.055 Uiso 1 1 calc R U . . .
C56 C 0.8527(3) 0.4486(4) 0.6314(3) 0.0464(16) Uani 1 1 d . . . . .
H56 H 0.8901 0.4702 0.6248 0.056 Uiso 1 1 calc R U . . .
C57 C 0.8348(4) 0.4252(4) 0.6947(3) 0.0494(17) Uani 1 1 d . . . . .
H57 H 0.8593 0.4314 0.7317 0.059 Uiso 1 1 calc R U . . .
C58 C 0.7805(3) 0.3923(4) 0.7044(3) 0.0381(14) Uani 1 1 d . . . . .
H58 H 0.7688 0.3752 0.7481 0.046 Uiso 1 1 calc R U . . .
C59 C 0.7193(3) 0.1646(3) 0.5191(2) 0.0248(11) Uani 1 1 d . . . . .
C60 C 0.6967(3) 0.2122(3) 0.4581(2) 0.0288(12) Uani 1 1 d . . . . .
H60 H 0.7017 0.2608 0.4507 0.035 Uiso 1 1 calc R U . . .
C61 C 0.6669(3) 0.1884(4) 0.4087(3) 0.0376(14) Uani 1 1 d . . . . .
H61 H 0.6523 0.2202 0.3673 0.045 Uiso 1 1 calc R U . . .
C62 C 0.6586(3) 0.1178(4) 0.4198(3) 0.0419(15) Uani 1 1 d . . . . .
H62 H 0.6376 0.1018 0.3861 0.050 Uiso 1 1 calc R U . . .
C63 C 0.6804(3) 0.0716(4) 0.4789(3) 0.0404(15) Uani 1 1 d . . . . .
H63 H 0.6742 0.0237 0.4863 0.048 Uiso 1 1 calc R U . . .
C64 C 0.7116(3) 0.0941(3) 0.5281(3) 0.0314(12) Uani 1 1 d . . . . .
H64 H 0.7280 0.0606 0.5686 0.038 Uiso 1 1 calc R U . . .
C65 C 0.8429(3) 0.2035(3) 0.5676(3) 0.0261(11) Uani 1 1 d . . . . .
C66 C 0.8942(4) 0.1895(5) 0.6185(3) 0.057(2) Uani 1 1 d . . . . .
H66 H 0.8812 0.1741 0.6623 0.068 Uiso 1 1 calc R U . . .
C67 C 0.9649(5) 0.1976(6) 0.6063(4) 0.079(3) Uani 1 1 d . . . . .
H67 H 0.9991 0.1895 0.6419 0.095 Uiso 1 1 calc R U . . .
C68 C 0.9851(4) 0.2172(4) 0.5427(4) 0.0532(18) Uani 1 1 d . . . . .
H68 H 1.0346 0.2203 0.5338 0.064 Uiso 1 1 calc R U . . .
C69 C 0.9348(4) 0.2320(4) 0.4927(3) 0.0511(18) Uani 1 1 d . . . . .
H69 H 0.9480 0.2476 0.4491 0.061 Uiso 1 1 calc R U . . .
C70 C 0.8636(3) 0.2247(4) 0.5044(3) 0.0412(15) Uani 1 1 d . . . . .
H70 H 0.8291 0.2343 0.4686 0.049 Uiso 1 1 calc R U . . .
C71A C 0.9725(3) -0.0389(3) 0.6696(3) 0.0286(12) Uani 0.39(2) 1 d . . P A 1
C72A C 0.9690(12) 0.0042(15) 0.6095(12) 0.059(7) Uani 0.39(2) 1 d . . P A 1
H72A H 0.9178 0.0382 0.5899 0.071 Uiso 0.39(2) 1 calc R U P A 1
C73A C 1.0419(14) -0.0017(18) 0.5763(13) 0.074(9) Uani 0.39(2) 1 d . . P A 1
H73A H 1.0397 0.0258 0.5335 0.089 Uiso 0.39(2) 1 calc R U P A 1
C74A C 1.1132(4) -0.0461(5) 0.6058(4) 0.0539(18) Uani 0.39(2) 1 d . . P A 1
H74A H 1.1598 -0.0404 0.5896 0.065 Uiso 0.39(2) 1 calc R U P A 1
C75A C 1.1191(13) -0.102(3) 0.6616(10) 0.089(13) Uani 0.39(2) 1 d . . P A 1
H75A H 1.1709 -0.1423 0.6769 0.107 Uiso 0.39(2) 1 calc R U P A 1
C76A C 1.0471(10) -0.097(2) 0.6938(11) 0.094(14) Uani 0.39(2) 1 d . . P A 1
H76A H 1.0497 -0.1332 0.7317 0.113 Uiso 0.39(2) 1 calc R U P A 1
C71B C 0.9725(3) -0.0389(3) 0.6696(3) 0.0286(12) Uani 0.61(2) 1 d . . P A 2
C72B C 0.9845(8) -0.0448(11) 0.6041(6) 0.041(4) Uani 0.61(2) 1 d . . P A 2
H72B H 0.9436 -0.0454 0.5791 0.050 Uiso 0.61(2) 1 calc R U P A 2
C73B C 1.0553(10) -0.0501(11) 0.5718(7) 0.050(4) Uani 0.61(2) 1 d . . P A 2
H73B H 1.0633 -0.0566 0.5255 0.060 Uiso 0.61(2) 1 calc R U P A 2
C74B C 1.1132(4) -0.0461(5) 0.6058(4) 0.0539(18) Uani 0.61(2) 1 d . . P A 2
H74B H 1.1623 -0.0515 0.5839 0.065 Uiso 0.61(2) 1 calc R U P A 2
C75B C 1.1005(8) -0.0345(11) 0.6706(7) 0.062(4) Uani 0.61(2) 1 d . . P A 2
H75B H 1.1397 -0.0287 0.6939 0.074 Uiso 0.61(2) 1 calc R U P A 2
C76B C 1.0305(8) -0.0306(11) 0.7046(6) 0.048(4) Uani 0.61(2) 1 d . . P A 2
H76B H 1.0221 -0.0225 0.7506 0.057 Uiso 0.61(2) 1 calc R U P A 2
C77 C 0.8541(3) -0.1001(3) 0.6763(2) 0.0249(11) Uani 1 1 d . . . . .
C78 C 0.9155(3) -0.1747(3) 0.6579(3) 0.0368(14) Uani 1 1 d . . . . .
H78 H 0.9712 -0.1894 0.6635 0.044 Uiso 1 1 calc R U . . .
C79 C 0.8939(4) -0.2271(4) 0.6314(3) 0.0474(16) Uani 1 1 d . . . . .
H79 H 0.9354 -0.2774 0.6177 0.057 Uiso 1 1 calc R U . . .
C80 C 0.8138(4) -0.2074(4) 0.6246(3) 0.0509(17) Uani 1 1 d . . . . .
H80 H 0.7999 -0.2440 0.6067 0.061 Uiso 1 1 calc R U . . .
C81 C 0.7539(4) -0.1347(4) 0.6438(3) 0.0407(14) Uani 1 1 d . . . . .
H81 H 0.6983 -0.1213 0.6393 0.049 Uiso 1 1 calc R U . . .
C82 C 0.7731(3) -0.0808(3) 0.6696(2) 0.0306(12) Uani 1 1 d . . . . .
H82 H 0.7310 -0.0305 0.6827 0.037 Uiso 1 1 calc R U . . .
C83 C 0.7791(3) -0.1118(3) 0.8400(2) 0.0257(11) Uani 1 1 d . . . . .
C84 C 0.8250(3) -0.1916(3) 0.8264(3) 0.0333(13) Uani 1 1 d . . . . .
H84 H 0.8827 -0.2155 0.8253 0.040 Uiso 1 1 calc R U . . .
C85 C 0.7869(4) -0.2372(4) 0.8141(3) 0.0436(15) Uani 1 1 d . . . . .
H85 H 0.8189 -0.2920 0.8041 0.052 Uiso 1 1 calc R U . . .
C86 C 0.7035(4) -0.2041(4) 0.8163(3) 0.0442(15) Uani 1 1 d . . . . .
H86 H 0.6780 -0.2362 0.8089 0.053 Uiso 1 1 calc R U . . .
C87 C 0.6572(4) -0.1245(4) 0.8291(3) 0.0403(15) Uani 1 1 d . . . . .
H87 H 0.5995 -0.1011 0.8299 0.048 Uiso 1 1 calc R U . . .
C88 C 0.6940(3) -0.0780(3) 0.8409(2) 0.0285(12) Uani 1 1 d . . . . .
H88 H 0.6614 -0.0227 0.8496 0.034 Uiso 1 1 calc R U . . .
C89 C 0.8818(3) -0.0959(3) 0.9313(2) 0.0252(11) Uani 1 1 d . . . . .
C90 C 0.9294(3) -0.0631(3) 0.9520(3) 0.0278(12) Uani 1 1 d . . . . .
H90 H 0.9291 -0.0162 0.9280 0.033 Uiso 1 1 calc R U . . .
C91 C 0.9769(3) -0.0985(4) 1.0074(3) 0.0349(13) Uani 1 1 d . . . . .
H91 H 1.0101 -0.0766 1.0204 0.042 Uiso 1 1 calc R U . . .
C92 C 0.9765(3) -0.1652(4) 1.0438(3) 0.0377(14) Uani 1 1 d . . . . .
H92 H 1.0100 -0.1898 1.0814 0.045 Uiso 1 1 calc R U . . .
C93 C 0.9269(3) -0.1964(4) 1.0253(3) 0.0373(14) Uani 1 1 d . . . . .
H93 H 0.9244 -0.2407 1.0515 0.045 Uiso 1 1 calc R U . . .
C94 C 0.8812(3) -0.1629(3) 0.9688(3) 0.0300(12) Uani 1 1 d . . . . .
H94 H 0.8492 -0.1859 0.9554 0.036 Uiso 1 1 calc R U . . .
C95 C 0.7551(3) 0.1103(3) 1.0261(2) 0.0269(12) Uani 1 1 d . . . . .
C96 C 0.8114(3) 0.1299(4) 1.0494(3) 0.0344(13) Uani 1 1 d . . . . .
H96 H 0.8161 0.1762 1.0297 0.041 Uiso 1 1 calc R U . . .
C97 C 0.8608(3) 0.0819(4) 1.1014(3) 0.0396(14) Uani 1 1 d . . . . .
H97 H 0.8991 0.0958 1.1172 0.048 Uiso 1 1 calc R U . . .
C98 C 0.8553(4) 0.0143(4) 1.1304(3) 0.0436(15) Uani 1 1 d . . . . .
H98 H 0.8893 -0.0181 1.1661 0.052 Uiso 1 1 calc R U . . .
C99 C 0.7999(4) -0.0060(4) 1.1073(3) 0.0428(15) Uani 1 1 d . . . . .
H99 H 0.7961 -0.0529 1.1267 0.051 Uiso 1 1 calc R U . . .
C100 C 0.7502(3) 0.0414(3) 1.0561(3) 0.0333(13) Uani 1 1 d . . . . .
H100 H 0.7118 0.0272 1.0408 0.040 Uiso 1 1 calc R U . . .
C101 C 0.5879(3) 0.1881(3) 0.9886(3) 0.0287(12) Uani 1 1 d . . . . .
C102 C 0.5349(3) 0.1845(4) 0.9470(3) 0.0386(14) Uani 1 1 d . . . . .
H102 H 0.5519 0.1703 0.9029 0.046 Uiso 1 1 calc R U . . .
C103 C 0.4561(4) 0.2017(4) 0.9695(3) 0.0515(18) Uani 1 1 d . . . . .
H103 H 0.4193 0.1997 0.9406 0.062 Uiso 1 1 calc R U . . .
C104 C 0.4320(4) 0.2214(4) 1.0331(4) 0.0542(19) Uani 1 1 d . . . . .
H104 H 0.3785 0.2325 1.0485 0.065 Uiso 1 1 calc R U . . .
C105 C 0.4844(4) 0.2256(4) 1.0755(3) 0.0556(19) Uani 1 1 d . . . . .
H105 H 0.4669 0.2404 1.1195 0.067 Uiso 1 1 calc R U . . .
C106 C 0.5635(4) 0.2078(4) 1.0529(3) 0.0430(15) Uani 1 1 d . . . . .
H106 H 0.6005 0.2094 1.0819 0.052 Uiso 1 1 calc R U . . .
C107 C 0.5298(3) 0.3771(3) 0.8995(3) 0.0314(12) Uani 1 1 d . . . . .
C108 C 0.5005(4) 0.4127(4) 0.9584(3) 0.0558(18) Uani 1 1 d . . . . .
H108 H 0.5376 0.4113 0.9888 0.067 Uiso 1 1 calc R U . . .
C109 C 0.4179(4) 0.4502(5) 0.9738(4) 0.063(2) Uani 1 1 d . . . . .
H109 H 0.3990 0.4725 1.0154 0.076 Uiso 1 1 calc R U . . .
C110 C 0.3633(4) 0.4555(4) 0.9295(4) 0.0543(18) Uani 1 1 d . . . . .
H110 H 0.3064 0.4838 0.9390 0.065 Uiso 1 1 calc R U . . .
C111 C 0.3911(4) 0.4199(4) 0.8721(4) 0.061(2) Uani 1 1 d . . . . .
H111 H 0.3535 0.4220 0.8417 0.073 Uiso 1 1 calc R U . . .
C112 C 0.4751(4) 0.3796(4) 0.8566(3) 0.0472(16) Uani 1 1 d . . . . .
H112 H 0.4939 0.3541 0.8163 0.057 Uiso 1 1 calc R U . . .
C113 C 0.6618(4) 0.4138(3) 0.8709(3) 0.0330(13) Uani 1 1 d . . . . .
C114 C 0.7370(4) 0.4028(4) 0.8897(3) 0.0451(16) Uani 1 1 d . . . . .
H114 H 0.7757 0.3516 0.9093 0.054 Uiso 1 1 calc R U . . .
C115 C 0.7549(5) 0.4681(5) 0.8793(4) 0.064(2) Uani 1 1 d . . . . .
H115 H 0.8061 0.4609 0.8921 0.076 Uiso 1 1 calc R U . . .
C116 C 0.7006(5) 0.5414(5) 0.8513(4) 0.066(2) Uani 1 1 d . . . . .
H116 H 0.7133 0.5854 0.8454 0.079 Uiso 1 1 calc R U . . .
C117 C 0.6274(5) 0.5517(4) 0.8316(4) 0.065(2) Uani 1 1 d . . . . .
H117 H 0.5897 0.6027 0.8112 0.078 Uiso 1 1 calc R U . . .
C118 C 0.6082(4) 0.4885(4) 0.8412(3) 0.0478(16) Uani 1 1 d . . . . .
H118 H 0.5572 0.4964 0.8271 0.057 Uiso 1 1 calc R U . . .
B119 B 0.8870(4) 0.1572(4) 0.8275(3) 0.0352(15) Uani 1 1 d . . . . .
F120 F 0.8333(2) 0.1565(3) 0.78547(19) 0.0670(12) Uani 1 1 d . . . . .
F121 F 0.8784(3) 0.2321(3) 0.8282(3) 0.115(2) Uani 1 1 d . . . . .
F122 F 0.9639(2) 0.1062(4) 0.8114(3) 0.111(2) Uani 1 1 d . . . . .
F123 F 0.8686(3) 0.1356(4) 0.8899(2) 0.0961(17) Uani 1 1 d . . . . .
B124 B 0.1900(5) 0.6341(6) 0.6556(6) 0.071(3) Uani 1 1 d . . . . .
F125 F 0.2267(2) 0.5770(3) 0.7061(3) 0.1012(19) Uani 1 1 d . . . . .
F126 F 0.2248(3) 0.6853(3) 0.6447(3) 0.1051(19) Uani 1 1 d . . . . .
F127 F 0.1085(2) 0.6808(3) 0.6686(3) 0.0851(14) Uani 1 1 d . . . . .
F128 F 0.1989(4) 0.5953(4) 0.6005(3) 0.148(3) Uani 1 1 d . . . . .
O129 O 0.1494(4) 0.5772(5) 0.9330(4) 0.114(2) Uani 1 1 d . . . . .
C130 C 0.1400(7) 0.5853(6) 0.8633(6) 0.112(4) Uani 1 1 d . . . . .
H13A H 0.1183 0.5493 0.8511 0.135 Uiso 1 1 calc R U . . .
H13B H 0.1927 0.5713 0.8394 0.135 Uiso 1 1 calc R U . . .
C131 C 0.0815(6) 0.6716(6) 0.8471(6) 0.110(4) Uani 1 1 d . . . . .
H13C H 0.0250 0.6792 0.8500 0.133 Uiso 1 1 calc R U . . .
H13D H 0.0925 0.6903 0.8015 0.133 Uiso 1 1 calc R U . . .
C132 C 0.0932(5) 0.7175(5) 0.8965(4) 0.074(2) Uani 1 1 d . . . . .
H13E H 0.0409 0.7635 0.9094 0.088 Uiso 1 1 calc R U . . .
H13F H 0.1319 0.7384 0.8796 0.088 Uiso 1 1 calc R U . . .
C133 C 0.1278(7) 0.6530(7) 0.9541(5) 0.114(4) Uani 1 1 d . . . . .
H13G H 0.1763 0.6535 0.9707 0.136 Uiso 1 1 calc R U . . .
H13H H 0.0867 0.6645 0.9908 0.136 Uiso 1 1 calc R U . . .
O134 O 0.6156(4) 0.7135(4) 0.7311(3) 0.0791(16) Uani 1 1 d . . . . .
C135 C 0.5440(5) 0.7457(5) 0.6948(5) 0.082(3) Uani 1 1 d . . . . .
H13I H 0.5042 0.7993 0.7096 0.098 Uiso 1 1 calc R U . . .
H13J H 0.5190 0.7088 0.7012 0.098 Uiso 1 1 calc R U . . .
C136 C 0.5679(5) 0.7542(5) 0.6244(4) 0.072(2) Uani 1 1 d . . . . .
H13K H 0.5682 0.8070 0.6130 0.086 Uiso 1 1 calc R U . . .
H13L H 0.5303 0.7499 0.5948 0.086 Uiso 1 1 calc R U . . .
C137 C 0.6513(5) 0.6856(5) 0.6186(4) 0.073(2) Uani 1 1 d . . . . .
H13M H 0.6877 0.7029 0.5910 0.088 Uiso 1 1 calc R U . . .
H13N H 0.6504 0.6397 0.5990 0.088 Uiso 1 1 calc R U . . .
C138 C 0.6777(5) 0.6625(7) 0.6893(5) 0.100(3) Uani 1 1 d . . . . .
H13O H 0.6900 0.6053 0.7021 0.120 Uiso 1 1 calc R U . . .
H13P H 0.7277 0.6676 0.6940 0.120 Uiso 1 1 calc R U . . .
O139 O 0.8789(13) 0.6335(12) 1.0186(7) 0.277(10) Uani 1 1 d . U . . .
C140 C 0.9192(9) 0.6017(11) 0.9541(9) 0.181(8) Uani 1 1 d . . . . .
H14A H 0.9157 0.6467 0.9213 0.217 Uiso 1 1 calc R U . . .
H14B H 0.9773 0.5622 0.9603 0.217 Uiso 1 1 calc R U . . .
C141 C 0.8755(7) 0.5633(6) 0.9325(6) 0.108(4) Uani 1 1 d . . . . .
H14C H 0.9011 0.5047 0.9479 0.130 Uiso 1 1 calc R U . . .
H14D H 0.8723 0.5696 0.8835 0.130 Uiso 1 1 calc R U . . .
C142 C 0.7967(7) 0.6062(7) 0.9633(5) 0.098(3) Uani 1 1 d . . . . .
H14E H 0.7724 0.5691 0.9750 0.118 Uiso 1 1 calc R U . . .
H14F H 0.7603 0.6514 0.9321 0.118 Uiso 1 1 calc R U . . .
C143 C 0.8049(10) 0.6380(9) 1.0228(8) 0.173(7) Uani 1 1 d . . . . .
H14G H 0.7625 0.6950 1.0251 0.208 Uiso 1 1 calc R U . . .
H14H H 0.7994 0.6052 1.0630 0.208 Uiso 1 1 calc R U . . .
O144 O 0.0470(3) 0.4344(3) 0.3558(2) 0.0583(12) Uani 1 1 d . . . . .
C145 C -0.0380(4) 0.4559(4) 0.3576(3) 0.0549(18) Uani 1 1 d . . . . .
H14I H -0.0699 0.5044 0.3825 0.066 Uiso 1 1 calc R U . . .
H14J H -0.0472 0.4104 0.3791 0.066 Uiso 1 1 calc R U . . .
C146 C -0.0622(4) 0.4736(5) 0.2864(4) 0.060(2) Uani 1 1 d . . . . .
H14K H -0.0782 0.5311 0.2706 0.073 Uiso 1 1 calc R U . . .
H14L H -0.1078 0.4619 0.2801 0.073 Uiso 1 1 calc R U . . .
C147 C 0.0147(4) 0.4165(5) 0.2508(4) 0.0596(19) Uani 1 1 d . . . . .
H14M H 0.0162 0.4355 0.2033 0.071 Uiso 1 1 calc R U . . .
H14N H 0.0216 0.3603 0.2546 0.071 Uiso 1 1 calc R U . . .
C148 C 0.0776(4) 0.4229(5) 0.2900(4) 0.0583(19) Uani 1 1 d . . . . .
H14O H 0.1301 0.3726 0.2887 0.070 Uiso 1 1 calc R U . . .
H14P H 0.0865 0.4694 0.2708 0.070 Uiso 1 1 calc R U . . .
O149 O 0.7313(9) 0.2548(9) 1.2095(8) 0.074(5) Uiso 0.45(2) 1 d D . P B 1
C150 C 0.6969(13) 0.2025(13) 1.2145(10) 0.062(6) Uiso 0.45(2) 1 d D . P B 1
H15A H 0.7141 0.1694 1.1760 0.074 Uiso 0.45(2) 1 calc R U P B 1
H15B H 0.7143 0.1654 1.2556 0.074 Uiso 0.45(2) 1 calc R U P B 1
C151 C 0.6212(14) 0.2456(12) 1.2158(11) 0.055(5) Uiso 0.45(2) 1 d D . P B 1
H15C H 0.6006 0.2518 1.2624 0.066 Uiso 0.45(2) 1 calc R U P B 1
H15D H 0.5951 0.2191 1.1941 0.066 Uiso 0.45(2) 1 calc R U P B 1
C152 C 0.5994(18) 0.3293(15) 1.1795(16) 0.111(10) Uiso 0.45(2) 1 d D . P B 1
H15E H 0.5762 0.3724 1.2106 0.134 Uiso 0.45(2) 1 calc R U P B 1
H15F H 0.5602 0.3426 1.1440 0.134 Uiso 0.45(2) 1 calc R U P B 1
C153 C 0.6845(16) 0.3181(18) 1.1496(15) 0.098(10) Uiso 0.45(2) 1 d . . P B 1
H15G H 0.6903 0.3684 1.1470 0.118 Uiso 0.45(2) 1 calc R U P B 1
H15H H 0.6985 0.2945 1.1062 0.118 Uiso 0.45(2) 1 calc R U P B 1
O154 O 0.5913(9) 0.2885(11) 1.1862(8) 0.099(6) Uiso 0.55(2) 1 d D . P B 2
C155 C 0.6090(10) 0.3516(12) 1.1569(11) 0.086(6) Uiso 0.55(2) 1 d D . P B 2
H15I H 0.5737 0.4034 1.1766 0.103 Uiso 0.55(2) 1 calc R U P B 2
H15J H 0.6013 0.3598 1.1083 0.103 Uiso 0.55(2) 1 calc R U P B 2
C156 C 0.6962(11) 0.3218(15) 1.1722(13) 0.101(8) Uiso 0.55(2) 1 d D . P B 2
H15K H 0.7007 0.3678 1.1881 0.121 Uiso 0.55(2) 1 calc R U P B 2
H15L H 0.7279 0.3094 1.1297 0.121 Uiso 0.55(2) 1 calc R U P B 2
C157 C 0.740(4) 0.247(3) 1.223(3) 0.34(4) Uiso 0.55(2) 1 d D . P B 2
H15M H 0.7464 0.2607 1.2672 0.407 Uiso 0.55(2) 1 calc R U P B 2
H15N H 0.7912 0.2036 1.2059 0.407 Uiso 0.55(2) 1 calc R U P B 2
C158 C 0.6569(19) 0.2332(19) 1.2171(17) 0.159(16) Uiso 0.55(2) 1 d D . P B 2
H15O H 0.6754 0.1823 1.1955 0.191 Uiso 0.55(2) 1 calc R U P B 2
H15P H 0.6392 0.2231 1.2631 0.191 Uiso 0.55(2) 1 calc R U P B 2
 
loop_
 _atom_site_aniso_label
 _atom_site_aniso_U_11
 _atom_site_aniso_U_22
 _atom_site_aniso_U_33
 _atom_site_aniso_U_23
 _atom_site_aniso_U_13
 _atom_site_aniso_U_12
Ru1 0.0161(2) 0.0315(2) 0.0213(2) -0.00385(17) 0.00107(16) -0.01215(18)
C1 0.019(3) 0.034(3) 0.021(3) -0.004(2) 0.005(2) -0.011(2)
Ag3 0.0208(2) 0.0305(2) 0.0213(2) -0.00224(16) 0.00400(15) -0.01231(17)
C2 0.019(3) 0.036(3) 0.024(3) -0.002(2) 0.002(2) -0.013(2)
Ag4 0.0212(2) 0.0316(2) 0.0216(2) -0.00130(16) 0.00113(15) -0.01391(17)
C3 0.016(2) 0.031(3) 0.019(2) -0.004(2) 0.0052(19) -0.011(2)
Ag5 0.0255(2) 0.0298(2) 0.0210(2) -0.00276(16) 0.00268(15) -0.01557(17)
C4 0.022(3) 0.030(3) 0.017(2) -0.004(2) 0.005(2) -0.013(2)
P5 0.0195(6) 0.0342(8) 0.0208(7) -0.0023(6) 0.0009(5) -0.0134(6)
C5 0.022(3) 0.035(3) 0.028(3) -0.010(2) 0.005(2) -0.014(2)
P6 0.0197(6) 0.0321(8) 0.0237(7) -0.0019(6) 0.0025(5) -0.0148(6)
C6 0.032(3) 0.033(3) 0.029(3) -0.007(2) 0.010(2) -0.020(2)
P7 0.0259(7) 0.0285(7) 0.0209(7) -0.0008(5) 0.0004(5) -0.0160(6)
C7 0.034(3) 0.028(3) 0.021(3) -0.005(2) 0.002(2) -0.020(2)
P8 0.0198(6) 0.0292(7) 0.0191(6) -0.0019(5) 0.0033(5) -0.0126(6)
P9 0.0182(6) 0.0319(8) 0.0203(7) 0.0004(6) 0.0040(5) -0.0111(6)
C9 0.021(3) 0.033(3) 0.019(3) 0.000(2) 0.005(2) -0.011(2)
P10 0.0192(6) 0.0308(7) 0.0191(6) -0.0001(6) 0.0028(5) -0.0112(6)
P11 0.0242(7) 0.0311(7) 0.0215(7) -0.0029(6) 0.0027(5) -0.0168(6)
C11 0.029(3) 0.031(3) 0.026(3) -0.005(2) 0.004(2) -0.016(2)
P12 0.0322(7) 0.0300(8) 0.0211(7) -0.0038(6) 0.0037(6) -0.0176(6)
C13 0.025(3) 0.036(3) 0.035(3) -0.011(3) 0.005(2) -0.014(2)
C14 0.029(3) 0.030(3) 0.032(3) -0.011(2) 0.001(2) -0.010(2)
C15 0.033(3) 0.026(3) 0.026(3) -0.007(2) 0.000(2) -0.012(2)
C16 0.023(3) 0.032(3) 0.030(3) -0.009(2) 0.002(2) -0.013(2)
C17 0.036(3) 0.033(3) 0.024(3) -0.009(2) 0.001(2) -0.019(3)
C18 0.029(3) 0.051(4) 0.054(4) -0.021(3) 0.017(3) -0.019(3)
C19 0.042(4) 0.044(4) 0.047(4) -0.008(3) -0.008(3) -0.012(3)
C20 0.056(4) 0.039(4) 0.042(4) -0.005(3) 0.008(3) -0.029(3)
C21 0.023(3) 0.051(4) 0.050(4) -0.011(3) -0.006(3) -0.018(3)
C22 0.055(4) 0.046(4) 0.027(3) -0.005(3) -0.005(3) -0.024(3)
C23 0.020(3) 0.029(3) 0.028(3) -0.004(2) 0.004(2) -0.011(2)
C24 0.032(3) 0.044(4) 0.028(3) -0.004(3) -0.004(2) -0.012(3)
C25 0.031(3) 0.048(4) 0.042(4) 0.001(3) -0.013(3) -0.007(3)
C26 0.034(3) 0.052(4) 0.032(3) 0.011(3) -0.009(3) -0.025(3)
C27 0.024(3) 0.067(4) 0.028(3) 0.009(3) -0.002(2) -0.024(3)
C28 0.025(3) 0.058(4) 0.026(3) 0.002(3) -0.001(2) -0.020(3)
C29 0.024(3) 0.029(3) 0.021(3) 0.004(2) 0.000(2) -0.009(2)
C30 0.030(3) 0.046(3) 0.028(3) 0.006(3) -0.004(2) -0.025(3)
C31 0.028(3) 0.053(4) 0.028(3) 0.011(3) -0.006(2) -0.027(3)
C32 0.016(3) 0.061(4) 0.040(4) 0.020(3) 0.001(2) -0.014(3)
C33 0.024(3) 0.046(4) 0.039(3) 0.006(3) 0.005(2) -0.009(3)
C34 0.027(3) 0.041(3) 0.030(3) -0.001(3) 0.002(2) -0.016(3)
C35 0.025(3) 0.032(3) 0.027(3) -0.006(2) 0.002(2) -0.017(2)
C36 0.025(3) 0.036(3) 0.030(3) 0.004(2) 0.000(2) -0.015(2)
C37 0.029(3) 0.053(4) 0.039(3) 0.005(3) 0.000(3) -0.025(3)
C38 0.032(3) 0.045(4) 0.042(4) 0.006(3) -0.016(3) -0.020(3)
C39 0.042(3) 0.046(4) 0.029(3) 0.002(3) -0.006(3) -0.021(3)
C40 0.028(3) 0.034(3) 0.031(3) 0.002(2) 0.001(2) -0.016(2)
C41 0.021(3) 0.045(3) 0.023(3) -0.006(2) 0.002(2) -0.022(2)
C42 0.032(3) 0.051(4) 0.026(3) -0.002(3) 0.000(2) -0.023(3)
C43 0.032(3) 0.086(5) 0.029(3) -0.002(3) 0.005(3) -0.035(3)
C44 0.043(4) 0.098(6) 0.039(4) 0.012(4) -0.004(3) -0.052(4)
C45 0.053(4) 0.066(5) 0.049(4) 0.022(3) -0.020(3) -0.045(4)
C46 0.036(3) 0.047(4) 0.034(3) 0.003(3) -0.003(3) -0.024(3)
C47 0.027(3) 0.032(3) 0.022(3) -0.005(2) 0.003(2) -0.013(2)
C48 0.026(3) 0.041(4) 0.057(4) -0.009(3) 0.004(3) -0.012(3)
C49 0.028(3) 0.050(4) 0.067(5) -0.015(3) 0.001(3) -0.016(3)
C50 0.035(4) 0.052(4) 0.052(4) -0.019(3) 0.001(3) -0.009(3)
C51 0.051(4) 0.033(4) 0.076(5) -0.004(3) 0.010(4) -0.010(3)
C52 0.040(4) 0.030(3) 0.057(4) 0.001(3) 0.003(3) -0.014(3)
C53 0.028(3) 0.030(3) 0.024(3) -0.003(2) 0.003(2) -0.018(2)
C54 0.040(3) 0.041(3) 0.038(3) 0.003(3) 0.004(3) -0.026(3)
C55 0.049(4) 0.054(4) 0.042(4) 0.000(3) 0.008(3) -0.032(3)
C56 0.030(3) 0.042(4) 0.073(5) 0.004(3) 0.005(3) -0.025(3)
C57 0.050(4) 0.060(4) 0.055(4) 0.000(3) -0.011(3) -0.040(4)
C58 0.038(3) 0.048(4) 0.035(3) 0.002(3) -0.002(3) -0.026(3)
C59 0.019(2) 0.038(3) 0.018(2) -0.007(2) 0.008(2) -0.013(2)
C60 0.029(3) 0.034(3) 0.023(3) -0.005(2) 0.004(2) -0.014(2)
C61 0.032(3) 0.050(4) 0.027(3) -0.013(3) 0.001(2) -0.014(3)
C62 0.033(3) 0.063(4) 0.038(4) -0.024(3) 0.007(3) -0.026(3)
C63 0.038(3) 0.052(4) 0.043(4) -0.017(3) 0.014(3) -0.030(3)
C64 0.032(3) 0.036(3) 0.029(3) -0.004(2) 0.008(2) -0.018(3)
C65 0.021(3) 0.031(3) 0.028(3) -0.003(2) 0.006(2) -0.014(2)
C66 0.047(4) 0.104(6) 0.037(4) 0.010(4) -0.007(3) -0.053(4)
C67 0.059(5) 0.146(8) 0.060(5) 0.014(5) -0.021(4) -0.073(6)
C68 0.032(3) 0.076(5) 0.063(5) -0.007(4) 0.007(3) -0.036(4)
C69 0.041(4) 0.088(5) 0.039(4) -0.015(3) 0.019(3) -0.042(4)
C70 0.029(3) 0.073(4) 0.028(3) -0.006(3) 0.009(2) -0.030(3)
C71A 0.016(2) 0.034(3) 0.030(3) 0.002(2) 0.008(2) -0.008(2)
C72A 0.033(10) 0.031(12) 0.075(15) 0.028(11) 0.018(9) 0.008(9)
C73A 0.053(13) 0.054(16) 0.083(17) 0.011(14) 0.052(12) -0.011(13)
C74A 0.030(4) 0.067(5) 0.063(5) -0.005(4) 0.021(3) -0.025(4)
C75A 0.041(12) 0.19(4) 0.040(12) 0.026(17) -0.004(9) -0.060(18)
C76A 0.018(9) 0.15(3) 0.063(14) 0.061(18) 0.017(9) -0.016(13)
C71B 0.016(2) 0.034(3) 0.030(3) 0.002(2) 0.008(2) -0.008(2)
C72B 0.031(6) 0.065(10) 0.033(6) -0.009(7) 0.012(5) -0.026(7)
C73B 0.059(9) 0.062(10) 0.036(6) -0.005(7) 0.024(6) -0.037(9)
C74B 0.030(4) 0.067(5) 0.063(5) -0.005(4) 0.021(3) -0.025(4)
C75B 0.042(7) 0.101(13) 0.064(9) -0.003(8) 0.006(6) -0.054(8)
C76B 0.040(7) 0.075(11) 0.034(6) 0.005(6) 0.001(5) -0.033(7)
C77 0.029(3) 0.027(3) 0.019(3) -0.001(2) 0.006(2) -0.014(2)
C78 0.035(3) 0.036(3) 0.037(3) -0.002(3) 0.008(3) -0.016(3)
C79 0.052(4) 0.038(4) 0.048(4) -0.014(3) 0.022(3) -0.018(3)
C80 0.074(5) 0.050(4) 0.042(4) -0.008(3) 0.006(3) -0.039(4)
C81 0.042(4) 0.051(4) 0.037(3) 0.000(3) -0.006(3) -0.028(3)
C82 0.029(3) 0.038(3) 0.024(3) 0.000(2) 0.005(2) -0.016(3)
C83 0.026(3) 0.037(3) 0.016(2) 0.004(2) -0.003(2) -0.017(2)
C84 0.030(3) 0.040(3) 0.030(3) -0.001(3) 0.003(2) -0.017(3)
C85 0.061(4) 0.039(4) 0.038(4) -0.007(3) 0.006(3) -0.030(3)
C86 0.053(4) 0.061(4) 0.035(3) -0.006(3) 0.003(3) -0.040(4)
C87 0.034(3) 0.062(4) 0.032(3) 0.004(3) -0.002(3) -0.029(3)
C88 0.021(3) 0.037(3) 0.024(3) -0.001(2) 0.001(2) -0.012(2)
C89 0.018(2) 0.032(3) 0.021(3) 0.003(2) 0.000(2) -0.009(2)
C90 0.025(3) 0.034(3) 0.027(3) -0.002(2) 0.002(2) -0.017(2)
C91 0.033(3) 0.048(4) 0.026(3) -0.003(3) -0.002(2) -0.020(3)
C92 0.033(3) 0.059(4) 0.019(3) 0.004(3) -0.004(2) -0.021(3)
C93 0.033(3) 0.055(4) 0.026(3) 0.001(3) 0.002(2) -0.023(3)
C94 0.025(3) 0.037(3) 0.028(3) 0.001(2) -0.001(2) -0.015(2)
C95 0.029(3) 0.037(3) 0.017(3) -0.007(2) 0.008(2) -0.018(2)
C96 0.035(3) 0.045(3) 0.029(3) 0.002(3) 0.001(2) -0.025(3)
C97 0.034(3) 0.055(4) 0.031(3) -0.002(3) -0.008(3) -0.021(3)
C98 0.037(3) 0.059(4) 0.025(3) 0.003(3) -0.001(3) -0.016(3)
C99 0.044(4) 0.047(4) 0.030(3) 0.010(3) 0.003(3) -0.018(3)
C100 0.030(3) 0.037(3) 0.038(3) -0.001(3) 0.004(2) -0.020(3)
C101 0.030(3) 0.035(3) 0.026(3) -0.001(2) 0.007(2) -0.021(2)
C102 0.031(3) 0.050(4) 0.039(3) 0.001(3) 0.001(3) -0.024(3)
C103 0.032(3) 0.071(5) 0.057(4) 0.010(4) -0.006(3) -0.032(3)
C104 0.027(3) 0.061(5) 0.071(5) 0.001(4) 0.016(3) -0.022(3)
C105 0.044(4) 0.066(5) 0.050(4) -0.009(4) 0.027(3) -0.024(4)
C106 0.034(3) 0.056(4) 0.039(4) -0.012(3) 0.008(3) -0.021(3)
C107 0.035(3) 0.031(3) 0.027(3) -0.002(2) 0.002(2) -0.015(3)
C108 0.052(4) 0.067(5) 0.040(4) -0.021(3) 0.008(3) -0.017(4)
C109 0.051(4) 0.071(5) 0.057(5) -0.028(4) 0.027(4) -0.020(4)
C110 0.041(4) 0.050(4) 0.065(5) -0.005(4) 0.019(4) -0.019(3)
C111 0.037(4) 0.071(5) 0.072(5) -0.015(4) -0.007(4) -0.020(4)
C112 0.036(3) 0.054(4) 0.046(4) -0.015(3) 0.000(3) -0.015(3)
C113 0.049(4) 0.034(3) 0.022(3) -0.002(2) 0.008(2) -0.026(3)
C114 0.056(4) 0.040(4) 0.051(4) 0.006(3) -0.010(3) -0.033(3)
C115 0.081(5) 0.069(5) 0.067(5) 0.005(4) -0.018(4) -0.057(5)
C116 0.108(7) 0.055(5) 0.064(5) 0.002(4) -0.011(5) -0.062(5)
C117 0.094(6) 0.045(4) 0.062(5) 0.011(4) -0.014(4) -0.040(4)
C118 0.056(4) 0.048(4) 0.044(4) 0.005(3) -0.008(3) -0.028(3)
B119 0.028(3) 0.050(4) 0.036(4) 0.002(3) 0.001(3) -0.027(3)
F120 0.041(2) 0.125(4) 0.051(2) -0.026(2) -0.0008(18) -0.048(2)
F121 0.121(4) 0.077(4) 0.171(6) 0.024(4) -0.063(4) -0.067(3)
F122 0.029(2) 0.162(5) 0.129(5) -0.069(4) 0.002(3) -0.024(3)
F123 0.073(3) 0.163(5) 0.053(3) 0.026(3) -0.001(2) -0.063(3)
B124 0.033(5) 0.074(7) 0.088(8) 0.010(6) -0.001(5) -0.014(5)
F125 0.040(2) 0.108(4) 0.126(4) 0.054(3) -0.002(3) -0.024(3)
F126 0.073(3) 0.116(4) 0.135(5) 0.043(4) -0.023(3) -0.060(3)
F127 0.039(2) 0.077(3) 0.120(4) 0.001(3) -0.003(2) -0.013(2)
F128 0.149(6) 0.098(5) 0.117(5) -0.038(4) -0.010(4) 0.017(4)
O129 0.108(6) 0.108(6) 0.104(6) 0.005(5) -0.009(5) -0.033(5)
C130 0.104(8) 0.103(9) 0.114(9) -0.036(7) -0.034(7) -0.025(7)
C131 0.091(7) 0.090(8) 0.128(9) -0.003(7) -0.058(7) -0.015(6)
C132 0.062(5) 0.083(6) 0.069(6) -0.016(5) 0.019(4) -0.029(5)
C133 0.105(8) 0.097(8) 0.076(7) -0.022(6) -0.022(6) 0.012(6)
O134 0.100(5) 0.101(5) 0.058(3) -0.006(3) 0.004(3) -0.066(4)
C135 0.061(5) 0.084(6) 0.111(8) -0.030(5) 0.034(5) -0.044(5)
C136 0.080(6) 0.081(6) 0.060(5) -0.018(4) -0.011(4) -0.038(5)
C137 0.075(6) 0.086(6) 0.068(5) -0.014(5) 0.023(4) -0.048(5)
C138 0.050(5) 0.142(9) 0.083(7) 0.025(6) -0.003(5) -0.030(6)
O139 0.42(2) 0.49(3) 0.147(11) -0.031(13) -0.005(14) -0.39(2)
C140 0.132(12) 0.217(17) 0.211(18) 0.108(15) -0.054(12) -0.116(13)
C141 0.122(9) 0.085(7) 0.136(10) -0.025(7) 0.051(8) -0.067(7)
C142 0.114(9) 0.112(8) 0.078(7) -0.016(6) 0.004(6) -0.059(7)
C143 0.168(15) 0.135(12) 0.176(16) -0.095(11) 0.010(13) -0.021(11)
O144 0.058(3) 0.069(3) 0.054(3) -0.006(2) -0.015(2) -0.033(3)
C145 0.056(4) 0.053(4) 0.055(4) -0.013(3) 0.004(3) -0.024(4)
C146 0.042(4) 0.069(5) 0.060(5) 0.009(4) -0.006(3) -0.019(4)
C147 0.056(4) 0.077(5) 0.055(4) -0.013(4) -0.005(4) -0.037(4)
C148 0.039(4) 0.075(5) 0.064(5) -0.016(4) 0.005(3) -0.027(4)
 
_geom_special_details
;
 All esds (except the esd in the dihedral angle between two l.s. planes)
 are estimated using the full covariance matrix.  The cell esds are taken
 into account individually in the estimation of esds in distances, angles
 and torsion angles; correlations between esds in cell parameters are only
 used when they are defined by crystal symmetry.  An approximate (isotropic)
 treatment of cell esds is used for estimating esds involving l.s. planes.
;
 
loop_
 _geom_bond_atom_site_label_1
 _geom_bond_atom_site_label_2
 _geom_bond_distance
 _geom_bond_site_symmetry_2
 _geom_bond_publ_flag
Ru1 C1 1.979(5) . ?
Ru1 C14 2.244(5) . ?
Ru1 C13 2.245(5) . ?
Ru1 C17 2.262(5) . ?
Ru1 P6 2.2756(14) . ?
Ru1 P5 2.2759(13) . ?
Ru1 C15 2.279(5) . ?
Ru1 C16 2.292(5) . ?
C1 C2 1.232(7) . ?
Ag3 C4 2.259(4) . ?
Ag3 P9 2.4614(14) . ?
Ag3 P8 2.4666(13) . ?
Ag3 Ag5 3.0744(6) . ?
Ag3 Ag4 3.2106(5) . ?
C2 C3 1.361(7) . ?
Ag4 C4 2.235(5) . ?
Ag4 P11 2.4605(13) . ?
Ag4 P10 2.4668(14) . ?
Ag4 Ag5 3.0657(6) . ?
C3 C4 1.226(6) . ?
Ag5 C4 2.259(5) . ?
Ag5 P12 2.4599(14) . ?
Ag5 P7 2.4737(13) . ?
P5 C23 1.819(5) . ?
P5 C5 1.844(5) . ?
P5 C29 1.850(5) . ?
C5 C6 1.531(7) . ?
C5 H5A 0.9900 . ?
C5 H5B 0.9900 . ?
P6 C41 1.839(5) . ?
P6 C35 1.840(5) . ?
P6 C6 1.862(5) . ?
C6 H6A 0.9900 . ?
C6 H6B 0.9900 . ?
P7 C53 1.817(5) . ?
P7 C7 1.832(5) . ?
P7 C47 1.835(5) . ?
C7 P8 1.828(5) . ?
C7 H7A 0.9900 . ?
C7 H7B 0.9900 . ?
P8 C65 1.820(5) . ?
P8 C59 1.827(5) . ?
P9 C77 1.820(5) . ?
P9 C71A 1.829(5) . ?
P9 C9 1.833(5) . ?
C9 P10 1.840(5) . ?
C9 H9A 0.9900 . ?
C9 H9B 0.9900 . ?
P10 C83 1.819(5) . ?
P10 C89 1.821(5) . ?
P11 C95 1.818(5) . ?
P11 C101 1.835(5) . ?
P11 C11 1.845(5) . ?
C11 P12 1.827(5) . ?
C11 H11A 0.9900 . ?
C11 H11B 0.9900 . ?
P12 C107 1.824(5) . ?
P12 C113 1.827(5) . ?
C13 C17 1.420(7) . ?
C13 C14 1.438(8) . ?
C13 C18 1.494(7) . ?
C14 C15 1.419(7) . ?
C14 C19 1.504(8) . ?
C15 C16 1.435(7) . ?
C15 C20 1.497(7) . ?
C16 C17 1.442(7) . ?
C16 C21 1.504(7) . ?
C17 C22 1.494(7) . ?
C18 H18A 0.9800 . ?
C18 H18B 0.9800 . ?
C18 H18C 0.9800 . ?
C19 H19A 0.9800 . ?
C19 H19B 0.9800 . ?
C19 H19C 0.9800 . ?
C20 H20A 0.9800 . ?
C20 H20B 0.9800 . ?
C20 H20C 0.9800 . ?
C21 H21A 0.9800 . ?
C21 H21B 0.9800 . ?
C21 H21C 0.9800 . ?
C22 H22A 0.9800 . ?
C22 H22B 0.9800 . ?
C22 H22C 0.9800 . ?
C23 C24 1.390(7) . ?
C23 C28 1.406(7) . ?
C24 C25 1.386(8) . ?
C24 H24 0.9500 . ?
C25 C26 1.366(8) . ?
C25 H25 0.9500 . ?
C26 C27 1.368(8) . ?
C26 H26 0.9500 . ?
C27 C28 1.386(8) . ?
C27 H27 0.9500 . ?
C28 H28 0.9500 . ?
C29 C34 1.387(7) . ?
C29 C30 1.390(7) . ?
C30 C31 1.387(7) . ?
C30 H30 0.9500 . ?
C31 C32 1.360(8) . ?
C31 H31 0.9500 . ?
C32 C33 1.378(9) . ?
C32 H32 0.9500 . ?
C33 C34 1.396(7) . ?
C33 H33 0.9500 . ?
C34 H34 0.9500 . ?
C35 C40 1.391(7) . ?
C35 C36 1.397(7) . ?
C36 C37 1.393(7) . ?
C36 H36 0.9500 . ?
C37 C38 1.384(8) . ?
C37 H37 0.9500 . ?
C38 C39 1.371(8) . ?
C38 H38 0.9500 . ?
C39 C40 1.384(7) . ?
C39 H39 0.9500 . ?
C40 H40 0.9500 . ?
C41 C46 1.381(8) . ?
C41 C42 1.393(7) . ?
C42 C43 1.389(8) . ?
C42 H42 0.9500 . ?
C43 C44 1.376(9) . ?
C43 H43 0.9500 . ?
C44 C45 1.386(9) . ?
C44 H44 0.9500 . ?
C45 C46 1.389(8) . ?
C45 H45 0.9500 . ?
C46 H46 0.9500 . ?
C47 C52 1.362(8) . ?
C47 C48 1.384(7) . ?
C48 C49 1.389(8) . ?
C48 H48 0.9500 . ?
C49 C50 1.364(9) . ?
C49 H49 0.9500 . ?
C50 C51 1.383(9) . ?
C50 H50 0.9500 . ?
C51 C52 1.405(8) . ?
C51 H51 0.9500 . ?
C52 H52 0.9500 . ?
C53 C58 1.383(7) . ?
C53 C54 1.393(7) . ?
C54 C55 1.383(8) . ?
C54 H54 0.9500 . ?
C55 C56 1.370(9) . ?
C55 H55 0.9500 . ?
C56 C57 1.374(9) . ?
C56 H56 0.9500 . ?
C57 C58 1.398(8) . ?
C57 H57 0.9500 . ?
C58 H58 0.9500 . ?
C59 C64 1.380(7) . ?
C59 C60 1.405(7) . ?
C60 C61 1.385(7) . ?
C60 H60 0.9500 . ?
C61 C62 1.389(8) . ?
C61 H61 0.9500 . ?
C62 C63 1.362(9) . ?
C62 H62 0.9500 . ?
C63 C64 1.385(8) . ?
C63 H63 0.9500 . ?
C64 H64 0.9500 . ?
C65 C66 1.376(8) . ?
C65 C70 1.378(7) . ?
C66 C67 1.392(9) . ?
C66 H66 0.9500 . ?
C67 C68 1.373(10) . ?
C67 H67 0.9500 . ?
C68 C69 1.347(9) . ?
C68 H68 0.9500 . ?
C69 C70 1.391(7) . ?
C69 H69 0.9500 . ?
C70 H70 0.9500 . ?
C71A C72A 1.370(19) . ?
C71A C76A 1.39(2) . ?
C72A C73A 1.43(3) . ?
C72A H72A 0.9500 . ?
C73A C74A 1.34(3) . ?
C73A H73A 0.9500 . ?
C74A C75A 1.42(3) . ?
C74A H74A 0.9500 . ?
C75A C76A 1.41(2) . ?
C75A H75A 0.9500 . ?
C76A H76A 0.9500 . ?
C72B C73B 1.389(16) . ?
C72B H72B 0.9500 . ?
C73B H73B 0.9500 . ?
C75B C76B 1.399(15) . ?
C75B H75B 0.9500 . ?
C76B H76B 0.9500 . ?
C77 C82 1.388(7) . ?
C77 C78 1.396(7) . ?
C78 C79 1.387(8) . ?
C78 H78 0.9500 . ?
C79 C80 1.370(9) . ?
C79 H79 0.9500 . ?
C80 C81 1.368(9) . ?
C80 H80 0.9500 . ?
C81 C82 1.378(8) . ?
C81 H81 0.9500 . ?
C82 H82 0.9500 . ?
C83 C84 1.376(7) . ?
C83 C88 1.402(7) . ?
C84 C85 1.388(8) . ?
C84 H84 0.9500 . ?
C85 C86 1.372(8) . ?
C85 H85 0.9500 . ?
C86 C87 1.370(9) . ?
C86 H86 0.9500 . ?
C87 C88 1.380(8) . ?
C87 H87 0.9500 . ?
C88 H88 0.9500 . ?
C89 C94 1.393(7) . ?
C89 C90 1.399(7) . ?
C90 C91 1.382(7) . ?
C90 H90 0.9500 . ?
C91 C92 1.378(8) . ?
C91 H91 0.9500 . ?
C92 C93 1.390(8) . ?
C92 H92 0.9500 . ?
C93 C94 1.384(7) . ?
C93 H93 0.9500 . ?
C94 H94 0.9500 . ?
C95 C96 1.386(7) . ?
C95 C100 1.398(7) . ?
C96 C97 1.387(8) . ?
C96 H96 0.9500 . ?
C97 C98 1.376(8) . ?
C97 H97 0.9500 . ?
C98 C99 1.379(8) . ?
C98 H98 0.9500 . ?
C99 C100 1.374(8) . ?
C99 H99 0.9500 . ?
C100 H100 0.9500 . ?
C101 C102 1.373(7) . ?
C101 C106 1.379(7) . ?
C102 C103 1.394(8) . ?
C102 H102 0.9500 . ?
C103 C104 1.364(9) . ?
C103 H103 0.9500 . ?
C104 C105 1.380(10) . ?
C104 H104 0.9500 . ?
C105 C106 1.398(8) . ?
C105 H105 0.9500 . ?
C106 H106 0.9500 . ?
C107 C112 1.368(8) . ?
C107 C108 1.379(8) . ?
C108 C109 1.383(9) . ?
C108 H108 0.9500 . ?
C109 C110 1.368(10) . ?
C109 H109 0.9500 . ?
C110 C111 1.350(10) . ?
C110 H110 0.9500 . ?
C111 C112 1.407(9) . ?
C111 H111 0.9500 . ?
C112 H112 0.9500 . ?
C113 C118 1.381(8) . ?
C113 C114 1.391(8) . ?
C114 C115 1.397(8) . ?
C114 H114 0.9500 . ?
C115 C116 1.355(10) . ?
C115 H115 0.9500 . ?
C116 C117 1.366(10) . ?
C116 H116 0.9500 . ?
C117 C118 1.373(9) . ?
C117 H117 0.9500 . ?
C118 H118 0.9500 . ?
B119 F121 1.331(8) . ?
B119 F122 1.335(8) . ?
B119 F123 1.351(7) . ?
B119 F120 1.368(7) . ?
B124 F125 1.353(10) . ?
B124 F128 1.357(12) . ?
B124 F127 1.370(9) . ?
B124 F126 1.375(11) . ?
O129 C133 1.387(11) . ?
O129 C130 1.418(11) . ?
C130 C131 1.478(13) . ?
C130 H13A 0.9900 . ?
C130 H13B 0.9900 . ?
C131 C132 1.479(12) . ?
C131 H13C 0.9900 . ?
C131 H13D 0.9900 . ?
C132 C133 1.516(12) . ?
C132 H13E 0.9900 . ?
C132 H13F 0.9900 . ?
C133 H13G 0.9900 . ?
C133 H13H 0.9900 . ?
O134 C138 1.399(10) . ?
O134 C135 1.405(10) . ?
C135 C136 1.474(11) . ?
C135 H13I 0.9900 . ?
C135 H13J 0.9900 . ?
C136 C137 1.485(10) . ?
C136 H13K 0.9900 . ?
C136 H13L 0.9900 . ?
C137 C138 1.501(11) . ?
C137 H13M 0.9900 . ?
C137 H13N 0.9900 . ?
C138 H13O 0.9900 . ?
C138 H13P 0.9900 . ?
O139 C143 1.333(18) . ?
O139 C140 1.49(2) . ?
C140 C141 1.426(17) . ?
C140 H14A 0.9900 . ?
C140 H14B 0.9900 . ?
C141 C142 1.432(13) . ?
C141 H14C 0.9900 . ?
C141 H14D 0.9900 . ?
C142 C143 1.450(15) . ?
C142 H14E 0.9900 . ?
C142 H14F 0.9900 . ?
C143 H14G 0.9900 . ?
C143 H14H 0.9900 . ?
O144 C148 1.408(8) . ?
O144 C145 1.434(8) . ?
C145 C146 1.498(9) . ?
C145 H14I 0.9900 . ?
C145 H14J 0.9900 . ?
C146 C147 1.514(9) . ?
C146 H14K 0.9900 . ?
C146 H14L 0.9900 . ?
C147 C148 1.518(9) . ?
C147 H14M 0.9900 . ?
C147 H14N 0.9900 . ?
C148 H14O 0.9900 . ?
C148 H14P 0.9900 . ?
O149 C150 1.39(2) . ?
O149 C153 1.58(3) . ?
C150 C151 1.25(3) . ?
C150 H15A 0.9900 . ?
C150 H15B 0.9900 . ?
C151 C152 1.530(14) . ?
C151 H15C 0.9900 . ?
C151 H15D 0.9900 . ?
C152 C153 1.58(4) . ?
C152 H15E 0.9900 . ?
C152 H15F 0.9900 . ?
C153 H15G 0.9900 . ?
C153 H15H 0.9900 . ?
O154 C158 1.319(17) . ?
O154 C155 1.42(3) . ?
C155 C156 1.494(17) . ?
C155 H15I 0.9900 . ?
C155 H15J 0.9900 . ?
C156 C157 1.55(2) . ?
C156 H15K 0.9900 . ?
C156 H15L 0.9900 . ?
C157 C158 1.69(7) . ?
C157 H15M 0.9900 . ?
C157 H15N 0.9900 . ?
C158 H15O 0.9900 . ?
C158 H15P 0.9900 . ?
 
loop_
 _geom_angle_atom_site_label_1
 _geom_angle_atom_site_label_2
 _geom_angle_atom_site_label_3
 _geom_angle
 _geom_angle_site_symmetry_1
 _geom_angle_site_symmetry_3
 _geom_angle_publ_flag
C1 Ru1 C14 91.5(2) . . ?
C1 Ru1 C13 92.50(19) . . ?
C14 Ru1 C13 37.38(19) . . ?
C1 Ru1 C17 125.19(19) . . ?
C14 Ru1 C17 61.42(19) . . ?
C13 Ru1 C17 36.72(19) . . ?
C1 Ru1 P6 87.72(15) . . ?
C14 Ru1 P6 155.34(14) . . ?
C13 Ru1 P6 118.01(15) . . ?
C17 Ru1 P6 99.41(14) . . ?
C1 Ru1 P5 84.97(14) . . ?
C14 Ru1 P5 122.97(14) . . ?
C13 Ru1 P5 160.24(15) . . ?
C17 Ru1 P5 149.81(14) . . ?
P6 Ru1 P5 81.52(5) . . ?
C1 Ru1 C15 122.7(2) . . ?
C14 Ru1 C15 36.56(18) . . ?
C13 Ru1 C15 61.70(19) . . ?
C17 Ru1 C15 61.19(19) . . ?
P6 Ru1 C15 149.30(14) . . ?
P5 Ru1 C15 103.44(13) . . ?
C1 Ru1 C16 151.81(19) . . ?
C14 Ru1 C16 61.32(19) . . ?
C13 Ru1 C16 61.75(18) . . ?
C17 Ru1 C16 36.91(18) . . ?
P6 Ru1 C16 113.65(14) . . ?
P5 Ru1 C16 115.09(13) . . ?
C15 Ru1 C16 36.59(18) . . ?
C2 C1 Ru1 175.6(4) . . ?
C4 Ag3 P9 123.49(13) . . ?
C4 Ag3 P8 116.29(13) . . ?
P9 Ag3 P8 119.14(4) . . ?
C4 Ag3 Ag5 47.12(13) . . ?
P9 Ag3 Ag5 138.89(4) . . ?
P8 Ag3 Ag5 90.66(3) . . ?
C4 Ag3 Ag4 44.12(12) . . ?
P9 Ag3 Ag4 88.09(3) . . ?
P8 Ag3 Ag4 148.99(3) . . ?
Ag5 Ag3 Ag4 58.341(12) . . ?
C1 C2 C3 178.6(5) . . ?
C4 Ag4 P11 122.11(13) . . ?
C4 Ag4 P10 118.50(13) . . ?
P11 Ag4 P10 117.87(5) . . ?
C4 Ag4 Ag5 47.31(13) . . ?
P11 Ag4 Ag5 90.31(3) . . ?
P10 Ag4 Ag5 144.32(3) . . ?
C4 Ag4 Ag3 44.70(11) . . ?
P11 Ag4 Ag3 147.17(3) . . ?
P10 Ag4 Ag3 88.36(3) . . ?
Ag5 Ag4 Ag3 58.606(12) . . ?
C4 C3 C2 179.6(6) . . ?
C4 Ag5 P12 121.46(12) . . ?
C4 Ag5 P7 117.93(12) . . ?
P12 Ag5 P7 116.56(5) . . ?
C4 Ag5 Ag4 46.67(12) . . ?
P12 Ag5 Ag4 89.31(3) . . ?
P7 Ag5 Ag4 151.43(3) . . ?
C4 Ag5 Ag3 47.12(11) . . ?
P12 Ag5 Ag3 150.02(4) . . ?
P7 Ag5 Ag3 88.91(3) . . ?
Ag4 Ag5 Ag3 63.053(13) . . ?
C3 C4 Ag4 131.6(4) . . ?
C3 C4 Ag3 121.7(4) . . ?
Ag4 C4 Ag3 91.18(17) . . ?
C3 C4 Ag5 127.0(4) . . ?
Ag4 C4 Ag5 86.02(17) . . ?
Ag3 C4 Ag5 85.77(16) . . ?
C23 P5 C5 106.4(2) . . ?
C23 P5 C29 101.0(2) . . ?
C5 P5 C29 101.9(2) . . ?
C23 P5 Ru1 118.76(17) . . ?
C5 P5 Ru1 106.78(16) . . ?
C29 P5 Ru1 120.17(17) . . ?
C6 C5 P5 107.0(3) . . ?
C6 C5 H5A 110.3 . . ?
P5 C5 H5A 110.3 . . ?
C6 C5 H5B 110.3 . . ?
P5 C5 H5B 110.3 . . ?
H5A C5 H5B 108.6 . . ?
C41 P6 C35 101.9(2) . . ?
C41 P6 C6 102.9(2) . . ?
C35 P6 C6 103.8(2) . . ?
C41 P6 Ru1 119.90(18) . . ?
C35 P6 Ru1 115.08(17) . . ?
C6 P6 Ru1 111.34(17) . . ?
C5 C6 P6 110.4(4) . . ?
C5 C6 H6A 109.6 . . ?
P6 C6 H6A 109.6 . . ?
C5 C6 H6B 109.6 . . ?
P6 C6 H6B 109.6 . . ?
H6A C6 H6B 108.1 . . ?
C53 P7 C7 106.0(2) . . ?
C53 P7 C47 104.3(2) . . ?
C7 P7 C47 102.5(2) . . ?
C53 P7 Ag5 122.71(17) . . ?
C7 P7 Ag5 112.49(17) . . ?
C47 P7 Ag5 106.75(16) . . ?
P8 C7 P7 113.6(3) . . ?
P8 C7 H7A 108.8 . . ?
P7 C7 H7A 108.8 . . ?
P8 C7 H7B 108.8 . . ?
P7 C7 H7B 108.8 . . ?
H7A C7 H7B 107.7 . . ?
C65 P8 C59 109.2(2) . . ?
C65 P8 C7 105.0(2) . . ?
C59 P8 C7 100.6(2) . . ?
C65 P8 Ag3 113.35(17) . . ?
C59 P8 Ag3 114.42(17) . . ?
C7 P8 Ag3 113.15(16) . . ?
C77 P9 C71A 105.4(2) . . ?
C77 P9 C9 104.3(2) . . ?
C71A P9 C9 101.7(2) . . ?
C77 P9 Ag3 110.01(17) . . ?
C71A P9 Ag3 116.11(17) . . ?
C9 P9 Ag3 117.93(16) . . ?
P9 C9 P10 114.7(3) . . ?
P9 C9 H9A 108.6 . . ?
P10 C9 H9A 108.6 . . ?
P9 C9 H9B 108.6 . . ?
P10 C9 H9B 108.6 . . ?
H9A C9 H9B 107.6 . . ?
C83 P10 C89 105.0(2) . . ?
C83 P10 C9 105.1(2) . . ?
C89 P10 C9 99.4(2) . . ?
C83 P10 Ag4 113.07(17) . . ?
C89 P10 Ag4 119.36(17) . . ?
C9 P10 Ag4 113.18(17) . . ?
C95 P11 C101 103.5(2) . . ?
C95 P11 C11 103.7(2) . . ?
C101 P11 C11 104.6(2) . . ?
C95 P11 Ag4 117.10(17) . . ?
C101 P11 Ag4 112.16(18) . . ?
C11 P11 Ag4 114.41(17) . . ?
P12 C11 P11 112.3(3) . . ?
P12 C11 H11A 109.1 . . ?
P11 C11 H11A 109.1 . . ?
P12 C11 H11B 109.1 . . ?
P11 C11 H11B 109.1 . . ?
H11A C11 H11B 107.9 . . ?
C107 P12 C113 102.3(3) . . ?
C107 P12 C11 105.8(2) . . ?
C113 P12 C11 103.3(2) . . ?
C107 P12 Ag5 114.16(18) . . ?
C113 P12 Ag5 113.83(17) . . ?
C11 P12 Ag5 115.97(17) . . ?
C17 C13 C14 107.2(4) . . ?
C17 C13 C18 128.1(5) . . ?
C14 C13 C18 124.1(5) . . ?
C17 C13 Ru1 72.3(3) . . ?
C14 C13 Ru1 71.3(3) . . ?
C18 C13 Ru1 128.4(4) . . ?
C15 C14 C13 108.6(5) . . ?
C15 C14 C19 126.8(5) . . ?
C13 C14 C19 124.3(5) . . ?
C15 C14 Ru1 73.1(3) . . ?
C13 C14 Ru1 71.3(3) . . ?
C19 C14 Ru1 126.4(4) . . ?
C14 C15 C16 108.3(5) . . ?
C14 C15 C20 124.3(5) . . ?
C16 C15 C20 126.9(5) . . ?
C14 C15 Ru1 70.4(3) . . ?
C16 C15 Ru1 72.2(3) . . ?
C20 C15 Ru1 129.7(4) . . ?
C15 C16 C17 106.9(4) . . ?
C15 C16 C21 127.7(5) . . ?
C17 C16 C21 124.4(5) . . ?
C15 C16 Ru1 71.2(3) . . ?
C17 C16 Ru1 70.4(3) . . ?
C21 C16 Ru1 132.2(4) . . ?
C13 C17 C16 108.9(5) . . ?
C13 C17 C22 126.6(5) . . ?
C16 C17 C22 124.2(5) . . ?
C13 C17 Ru1 71.0(3) . . ?
C16 C17 Ru1 72.7(3) . . ?
C22 C17 Ru1 127.5(4) . . ?
C13 C18 H18A 109.5 . . ?
C13 C18 H18B 109.5 . . ?
H18A C18 H18B 109.5 . . ?
C13 C18 H18C 109.5 . . ?
H18A C18 H18C 109.5 . . ?
H18B C18 H18C 109.5 . . ?
C14 C19 H19A 109.5 . . ?
C14 C19 H19B 109.5 . . ?
H19A C19 H19B 109.5 . . ?
C14 C19 H19C 109.5 . . ?
H19A C19 H19C 109.5 . . ?
H19B C19 H19C 109.5 . . ?
C15 C20 H20A 109.5 . . ?
C15 C20 H20B 109.5 . . ?
H20A C20 H20B 109.5 . . ?
C15 C20 H20C 109.5 . . ?
H20A C20 H20C 109.5 . . ?
H20B C20 H20C 109.5 . . ?
C16 C21 H21A 109.5 . . ?
C16 C21 H21B 109.5 . . ?
H21A C21 H21B 109.5 . . ?
C16 C21 H21C 109.5 . . ?
H21A C21 H21C 109.5 . . ?
H21B C21 H21C 109.5 . . ?
C17 C22 H22A 109.5 . . ?
C17 C22 H22B 109.5 . . ?
H22A C22 H22B 109.5 . . ?
C17 C22 H22C 109.5 . . ?
H22A C22 H22C 109.5 . . ?
H22B C22 H22C 109.5 . . ?
C24 C23 C28 117.6(5) . . ?
C24 C23 P5 120.4(4) . . ?
C28 C23 P5 122.0(4) . . ?
C25 C24 C23 120.5(5) . . ?
C25 C24 H24 119.7 . . ?
C23 C24 H24 119.7 . . ?
C26 C25 C24 121.3(6) . . ?
C26 C25 H25 119.4 . . ?
C24 C25 H25 119.4 . . ?
C25 C26 C27 119.1(5) . . ?
C25 C26 H26 120.5 . . ?
C27 C26 H26 120.5 . . ?
C26 C27 C28 121.1(5) . . ?
C26 C27 H27 119.4 . . ?
C28 C27 H27 119.4 . . ?
C27 C28 C23 120.3(5) . . ?
C27 C28 H28 119.9 . . ?
C23 C28 H28 119.9 . . ?
C34 C29 C30 118.9(5) . . ?
C34 C29 P5 123.6(4) . . ?
C30 C29 P5 117.3(4) . . ?
C31 C30 C29 119.6(5) . . ?
C31 C30 H30 120.2 . . ?
C29 C30 H30 120.2 . . ?
C32 C31 C30 121.8(5) . . ?
C32 C31 H31 119.1 . . ?
C30 C31 H31 119.1 . . ?
C31 C32 C33 119.1(5) . . ?
C31 C32 H32 120.5 . . ?
C33 C32 H32 120.5 . . ?
C32 C33 C34 120.4(6) . . ?
C32 C33 H33 119.8 . . ?
C34 C33 H33 119.8 . . ?
C29 C34 C33 120.2(5) . . ?
C29 C34 H34 119.9 . . ?
C33 C34 H34 119.9 . . ?
C40 C35 C36 118.3(5) . . ?
C40 C35 P6 123.6(4) . . ?
C36 C35 P6 117.9(4) . . ?
C37 C36 C35 120.8(5) . . ?
C37 C36 H36 119.6 . . ?
C35 C36 H36 119.6 . . ?
C38 C37 C36 119.6(5) . . ?
C38 C37 H37 120.2 . . ?
C36 C37 H37 120.2 . . ?
C39 C38 C37 120.0(5) . . ?
C39 C38 H38 120.0 . . ?
C37 C38 H38 120.0 . . ?
C38 C39 C40 120.7(5) . . ?
C38 C39 H39 119.6 . . ?
C40 C39 H39 119.6 . . ?
C39 C40 C35 120.5(5) . . ?
C39 C40 H40 119.7 . . ?
C35 C40 H40 119.7 . . ?
C46 C41 C42 120.3(5) . . ?
C46 C41 P6 120.9(4) . . ?
C42 C41 P6 118.8(4) . . ?
C43 C42 C41 119.9(6) . . ?
C43 C42 H42 120.1 . . ?
C41 C42 H42 120.1 . . ?
C44 C43 C42 119.8(6) . . ?
C44 C43 H43 120.1 . . ?
C42 C43 H43 120.1 . . ?
C43 C44 C45 120.4(6) . . ?
C43 C44 H44 119.8 . . ?
C45 C44 H44 119.8 . . ?
C44 C45 C46 120.2(6) . . ?
C44 C45 H45 119.9 . . ?
C46 C45 H45 119.9 . . ?
C41 C46 C45 119.5(6) . . ?
C41 C46 H46 120.3 . . ?
C45 C46 H46 120.3 . . ?
C52 C47 C48 119.9(5) . . ?
C52 C47 P7 123.4(4) . . ?
C48 C47 P7 116.6(4) . . ?
C47 C48 C49 119.1(6) . . ?
C47 C48 H48 120.4 . . ?
C49 C48 H48 120.4 . . ?
C50 C49 C48 122.0(6) . . ?
C50 C49 H49 119.0 . . ?
C48 C49 H49 119.0 . . ?
C49 C50 C51 118.5(6) . . ?
C49 C50 H50 120.8 . . ?
C51 C50 H50 120.8 . . ?
C50 C51 C52 120.1(6) . . ?
C50 C51 H51 120.0 . . ?
C52 C51 H51 120.0 . . ?
C47 C52 C51 120.3(6) . . ?
C47 C52 H52 119.8 . . ?
C51 C52 H52 119.8 . . ?
C58 C53 C54 119.0(5) . . ?
C58 C53 P7 117.7(4) . . ?
C54 C53 P7 123.2(4) . . ?
C55 C54 C53 120.6(6) . . ?
C55 C54 H54 119.7 . . ?
C53 C54 H54 119.7 . . ?
C56 C55 C54 119.9(6) . . ?
C56 C55 H55 120.0 . . ?
C54 C55 H55 120.0 . . ?
C55 C56 C57 120.6(5) . . ?
C55 C56 H56 119.7 . . ?
C57 C56 H56 119.7 . . ?
C56 C57 C58 119.7(6) . . ?
C56 C57 H57 120.1 . . ?
C58 C57 H57 120.1 . . ?
C53 C58 C57 120.2(5) . . ?
C53 C58 H58 119.9 . . ?
C57 C58 H58 119.9 . . ?
C64 C59 C60 118.5(5) . . ?
C64 C59 P8 117.6(4) . . ?
C60 C59 P8 123.7(4) . . ?
C61 C60 C59 120.1(5) . . ?
C61 C60 H60 119.9 . . ?
C59 C60 H60 119.9 . . ?
C60 C61 C62 119.9(6) . . ?
C60 C61 H61 120.0 . . ?
C62 C61 H61 120.0 . . ?
C63 C62 C61 120.1(6) . . ?
C63 C62 H62 120.0 . . ?
C61 C62 H62 120.0 . . ?
C62 C63 C64 120.5(6) . . ?
C62 C63 H63 119.8 . . ?
C64 C63 H63 119.8 . . ?
C59 C64 C63 120.9(5) . . ?
C59 C64 H64 119.6 . . ?
C63 C64 H64 119.6 . . ?
C66 C65 C70 118.6(5) . . ?
C66 C65 P8 116.7(4) . . ?
C70 C65 P8 124.6(4) . . ?
C65 C66 C67 120.6(6) . . ?
C65 C66 H66 119.7 . . ?
C67 C66 H66 119.7 . . ?
C68 C67 C66 119.7(6) . . ?
C68 C67 H67 120.1 . . ?
C66 C67 H67 120.1 . . ?
C69 C68 C67 120.0(6) . . ?
C69 C68 H68 120.0 . . ?
C67 C68 H68 120.0 . . ?
C68 C69 C70 120.7(6) . . ?
C68 C69 H69 119.6 . . ?
C70 C69 H69 119.6 . . ?
C65 C70 C69 120.2(6) . . ?
C65 C70 H70 119.9 . . ?
C69 C70 H70 119.9 . . ?
C72A C71A C76A 119.9(11) . . ?
C72A C71A P9 117.8(9) . . ?
C76A C71A P9 121.9(8) . . ?
C71A C72A C73A 120.3(18) . . ?
C71A C72A H72A 119.8 . . ?
C73A C72A H72A 119.8 . . ?
C74A C73A C72A 119.5(19) . . ?
C74A C73A H73A 120.2 . . ?
C72A C73A H73A 120.2 . . ?
C73A C74A C75A 119.8(13) . . ?
C73A C74A H74A 120.1 . . ?
C75A C74A H74A 120.1 . . ?
C76A C75A C74A 119.0(19) . . ?
C76A C75A H75A 120.5 . . ?
C74A C75A H75A 120.5 . . ?
C71A C76A C75A 119.2(17) . . ?
C71A C76A H76A 120.4 . . ?
C75A C76A H76A 120.4 . . ?
C73B C72B H72B 119.2 . . ?
C72B C73B H73B 119.8 . . ?
C76B C75B H75B 119.5 . . ?
C75B C76B H76B 120.5 . . ?
C82 C77 C78 119.6(5) . . ?
C82 C77 P9 118.1(4) . . ?
C78 C77 P9 122.3(4) . . ?
C79 C78 C77 118.9(5) . . ?
C79 C78 H78 120.5 . . ?
C77 C78 H78 120.5 . . ?
C80 C79 C78 121.0(6) . . ?
C80 C79 H79 119.5 . . ?
C78 C79 H79 119.5 . . ?
C81 C80 C79 119.8(6) . . ?
C81 C80 H80 120.1 . . ?
C79 C80 H80 120.1 . . ?
C80 C81 C82 120.7(6) . . ?
C80 C81 H81 119.6 . . ?
C82 C81 H81 119.6 . . ?
C81 C82 C77 119.9(5) . . ?
C81 C82 H82 120.0 . . ?
C77 C82 H82 120.0 . . ?
C84 C83 C88 118.8(5) . . ?
C84 C83 P10 123.3(4) . . ?
C88 C83 P10 117.9(4) . . ?
C83 C84 C85 120.1(5) . . ?
C83 C84 H84 120.0 . . ?
C85 C84 H84 120.0 . . ?
C86 C85 C84 120.8(6) . . ?
C86 C85 H85 119.6 . . ?
C84 C85 H85 119.6 . . ?
C87 C86 C85 119.7(6) . . ?
C87 C86 H86 120.2 . . ?
C85 C86 H86 120.2 . . ?
C86 C87 C88 120.4(5) . . ?
C86 C87 H87 119.8 . . ?
C88 C87 H87 119.8 . . ?
C87 C88 C83 120.3(5) . . ?
C87 C88 H88 119.8 . . ?
C83 C88 H88 119.8 . . ?
C94 C89 C90 118.6(5) . . ?
C94 C89 P10 124.0(4) . . ?
C90 C89 P10 117.4(4) . . ?
C91 C90 C89 120.4(5) . . ?
C91 C90 H90 119.8 . . ?
C89 C90 H90 119.8 . . ?
C92 C91 C90 120.6(5) . . ?
C92 C91 H91 119.7 . . ?
C90 C91 H91 119.7 . . ?
C91 C92 C93 119.6(5) . . ?
C91 C92 H92 120.2 . . ?
C93 C92 H92 120.2 . . ?
C94 C93 C92 120.1(5) . . ?
C94 C93 H93 120.0 . . ?
C92 C93 H93 120.0 . . ?
C93 C94 C89 120.7(5) . . ?
C93 C94 H94 119.7 . . ?
C89 C94 H94 119.7 . . ?
C96 C95 C100 118.3(5) . . ?
C96 C95 P11 124.0(4) . . ?
C100 C95 P11 117.6(4) . . ?
C95 C96 C97 120.1(5) . . ?
C95 C96 H96 120.0 . . ?
C97 C96 H96 120.0 . . ?
C98 C97 C96 120.9(6) . . ?
C98 C97 H97 119.5 . . ?
C96 C97 H97 119.5 . . ?
C97 C98 C99 119.4(6) . . ?
C97 C98 H98 120.3 . . ?
C99 C98 H98 120.3 . . ?
C100 C99 C98 120.1(6) . . ?
C100 C99 H99 119.9 . . ?
C98 C99 H99 119.9 . . ?
C99 C100 C95 121.1(5) . . ?
C99 C100 H100 119.4 . . ?
C95 C100 H100 119.4 . . ?
C102 C101 C106 119.9(5) . . ?
C102 C101 P11 118.1(4) . . ?
C106 C101 P11 122.0(4) . . ?
C101 C102 C103 120.1(6) . . ?
C101 C102 H102 120.0 . . ?
C103 C102 H102 119.9 . . ?
C104 C103 C102 119.9(6) . . ?
C104 C103 H103 120.1 . . ?
C102 C103 H103 120.1 . . ?
C103 C104 C105 120.8(6) . . ?
C103 C104 H104 119.6 . . ?
C105 C104 H104 119.6 . . ?
C104 C105 C106 119.2(6) . . ?
C104 C105 H105 120.4 . . ?
C106 C105 H105 120.4 . . ?
C101 C106 C105 120.1(6) . . ?
C101 C106 H106 120.0 . . ?
C105 C106 H106 120.0 . . ?
C112 C107 C108 118.4(6) . . ?
C112 C107 P12 118.3(4) . . ?
C108 C107 P12 123.3(5) . . ?
C107 C108 C109 121.0(7) . . ?
C107 C108 H108 119.5 . . ?
C109 C108 H108 119.5 . . ?
C110 C109 C108 120.3(6) . . ?
C110 C109 H109 119.8 . . ?
C108 C109 H109 119.8 . . ?
C111 C110 C109 119.2(6) . . ?
C111 C110 H110 120.4 . . ?
C109 C110 H110 120.4 . . ?
C110 C111 C112 120.9(7) . . ?
C110 C111 H111 119.5 . . ?
C112 C111 H111 119.5 . . ?
C107 C112 C111 120.0(6) . . ?
C107 C112 H112 120.0 . . ?
C111 C112 H112 120.0 . . ?
C118 C113 C114 118.6(5) . . ?
C118 C113 P12 119.2(5) . . ?
C114 C113 P12 121.8(4) . . ?
C113 C114 C115 119.0(6) . . ?
C113 C114 H114 120.5 . . ?
C115 C114 H114 120.5 . . ?
C116 C115 C114 121.3(7) . . ?
C116 C115 H115 119.3 . . ?
C114 C115 H115 119.3 . . ?
C115 C116 C117 119.7(6) . . ?
C115 C116 H116 120.1 . . ?
C117 C116 H116 120.1 . . ?
C116 C117 C118 120.2(7) . . ?
C116 C117 H117 119.9 . . ?
C118 C117 H117 119.9 . . ?
C117 C118 C113 121.2(7) . . ?
C117 C118 H118 119.4 . . ?
C113 C118 H118 119.4 . . ?
F121 B119 F122 110.1(6) . . ?
F121 B119 F123 106.3(6) . . ?
F122 B119 F123 109.7(6) . . ?
F121 B119 F120 110.8(6) . . ?
F122 B119 F120 111.6(6) . . ?
F123 B119 F120 108.1(5) . . ?
F125 B124 F128 107.9(9) . . ?
F125 B124 F127 112.1(8) . . ?
F128 B124 F127 108.6(8) . . ?
F125 B124 F126 110.3(8) . . ?
F128 B124 F126 110.3(8) . . ?
F127 B124 F126 107.6(8) . . ?
C133 O129 C130 109.1(8) . . ?
O129 C130 C131 105.2(8) . . ?
O129 C130 H13A 110.7 . . ?
C131 C130 H13A 110.7 . . ?
O129 C130 H13B 110.7 . . ?
C131 C130 H13B 110.7 . . ?
H13A C130 H13B 108.8 . . ?
C130 C131 C132 106.2(8) . . ?
C130 C131 H13C 110.5 . . ?
C132 C131 H13C 110.5 . . ?
C130 C131 H13D 110.5 . . ?
C132 C131 H13D 110.5 . . ?
H13C C131 H13D 108.7 . . ?
C131 C132 C133 101.6(8) . . ?
C131 C132 H13E 111.4 . . ?
C133 C132 H13E 111.4 . . ?
C131 C132 H13F 111.4 . . ?
C133 C132 H13F 111.4 . . ?
H13E C132 H13F 109.3 . . ?
O129 C133 C132 109.5(8) . . ?
O129 C133 H13G 109.8 . . ?
C132 C133 H13G 109.8 . . ?
O129 C133 H13H 109.8 . . ?
C132 C133 H13H 109.8 . . ?
H13G C133 H13H 108.2 . . ?
C138 O134 C135 105.4(6) . . ?
O134 C135 C136 106.6(6) . . ?
O134 C135 H13I 110.4 . . ?
C136 C135 H13I 110.4 . . ?
O134 C135 H13J 110.4 . . ?
C136 C135 H13J 110.4 . . ?
H13I C135 H13J 108.6 . . ?
C135 C136 C137 104.1(7) . . ?
C135 C136 H13K 110.9 . . ?
C137 C136 H13K 110.9 . . ?
C135 C136 H13L 110.9 . . ?
C137 C136 H13L 110.9 . . ?
H13K C136 H13L 109.0 . . ?
C136 C137 C138 103.0(7) . . ?
C136 C137 H13M 111.2 . . ?
C138 C137 H13M 111.2 . . ?
C136 C137 H13N 111.2 . . ?
C138 C137 H13N 111.2 . . ?
H13M C137 H13N 109.1 . . ?
O134 C138 C137 109.6(7) . . ?
O134 C138 H13O 109.7 . . ?
C137 C138 H13O 109.7 . . ?
O134 C138 H13P 109.7 . . ?
C137 C138 H13P 109.7 . . ?
H13O C138 H13P 108.2 . . ?
C143 O139 C140 109.2(13) . . ?
C141 C140 O139 105.1(11) . . ?
C141 C140 H14A 110.7 . . ?
O139 C140 H14A 110.7 . . ?
C141 C140 H14B 110.7 . . ?
O139 C140 H14B 110.7 . . ?
H14A C140 H14B 108.8 . . ?
C140 C141 C142 102.7(11) . . ?
C140 C141 H14C 111.2 . . ?
C142 C141 H14C 111.2 . . ?
C140 C141 H14D 111.2 . . ?
C142 C141 H14D 111.2 . . ?
H14C C141 H14D 109.1 . . ?
C141 C142 C143 109.0(11) . . ?
C141 C142 H14E 109.9 . . ?
C143 C142 H14E 109.9 . . ?
C141 C142 H14F 109.9 . . ?
C143 C142 H14F 109.9 . . ?
H14E C142 H14F 108.3 . . ?
O139 C143 C142 106.3(13) . . ?
O139 C143 H14G 110.5 . . ?
C142 C143 H14G 110.5 . . ?
O139 C143 H14H 110.5 . . ?
C142 C143 H14H 110.5 . . ?
H14G C143 H14H 108.7 . . ?
C148 O144 C145 109.3(5) . . ?
O144 C145 C146 105.4(5) . . ?
O144 C145 H14I 110.7 . . ?
C146 C145 H14I 110.7 . . ?
O144 C145 H14J 110.7 . . ?
C146 C145 H14J 110.7 . . ?
H14I C145 H14J 108.8 . . ?
C145 C146 C147 102.9(5) . . ?
C145 C146 H14K 111.2 . . ?
C147 C146 H14K 111.2 . . ?
C145 C146 H14L 111.2 . . ?
C147 C146 H14L 111.2 . . ?
H14K C146 H14L 109.1 . . ?
C146 C147 C148 99.5(6) . . ?
C146 C147 H14M 111.9 . . ?
C148 C147 H14M 111.9 . . ?
C146 C147 H14N 111.9 . . ?
C148 C147 H14N 111.9 . . ?
H14M C147 H14N 109.6 . . ?
O144 C148 C147 107.1(5) . . ?
O144 C148 H14O 110.3 . . ?
C147 C148 H14O 110.3 . . ?
O144 C148 H14P 110.3 . . ?
C147 C148 H14P 110.3 . . ?
H14O C148 H14P 108.6 . . ?
C150 O149 C153 102.6(17) . . ?
C151 C150 O149 107.1(16) . . ?
C151 C150 H15A 110.3 . . ?
O149 C150 H15A 110.3 . . ?
C151 C150 H15B 110.3 . . ?
O149 C150 H15B 110.3 . . ?
H15A C150 H15B 108.5 . . ?
C150 C151 C152 109.7(18) . . ?
C150 C151 H15C 109.7 . . ?
C152 C151 H15C 109.7 . . ?
C150 C151 H15D 109.7 . . ?
C152 C151 H15D 109.7 . . ?
H15C C151 H15D 108.2 . . ?
C151 C152 C153 102.3(19) . . ?
C151 C152 H15E 111.3 . . ?
C153 C152 H15E 111.3 . . ?
C151 C152 H15F 111.3 . . ?
C153 C152 H15F 111.3 . . ?
H15E C152 H15F 109.2 . . ?
C152 C153 O149 92.1(18) . . ?
C152 C153 H15G 113.3 . . ?
O149 C153 H15G 113.3 . . ?
C152 C153 H15H 113.3 . . ?
O149 C153 H15H 113.3 . . ?
H15G C153 H15H 110.6 . . ?
C158 O154 C155 108(2) . . ?
O154 C155 C156 103.9(16) . . ?
O154 C155 H15I 111.0 . . ?
C156 C155 H15I 111.0 . . ?
O154 C155 H15J 111.0 . . ?
C156 C155 H15J 111.0 . . ?
H15I C155 H15J 109.0 . . ?
C155 C156 C157 120(3) . . ?
C155 C156 H15K 107.2 . . ?
C157 C156 H15K 107.2 . . ?
C155 C156 H15L 107.2 . . ?
C157 C156 H15L 107.2 . . ?
H15K C156 H15L 106.8 . . ?
C156 C157 C158 85(3) . . ?
C156 C157 H15M 114.5 . . ?
C158 C157 H15M 114.5 . . ?
C156 C157 H15N 114.5 . . ?
C158 C157 H15N 114.5 . . ?
H15M C157 H15N 111.6 . . ?
O154 C158 C157 122(3) . . ?
O154 C158 H15O 106.9 . . ?
C157 C158 H15O 106.9 . . ?
O154 C158 H15P 106.9 . . ?
C157 C158 H15P 106.9 . . ?
H15O C158 H15P 106.7 . . ?
 
loop_
 _geom_torsion_atom_site_label_1
 _geom_torsion_atom_site_label_2
 _geom_torsion_atom_site_label_3
 _geom_torsion_atom_site_label_4
 _geom_torsion
 _geom_torsion_site_symmetry_1
 _geom_torsion_site_symmetry_2
 _geom_torsion_site_symmetry_3
 _geom_torsion_site_symmetry_4
 _geom_torsion_publ_flag
C23 P5 C5 C6 -179.4(3) . . . . ?
C29 P5 C5 C6 -74.0(4) . . . . ?
Ru1 P5 C5 C6 52.8(3) . . . . ?
P5 C5 C6 P6 -39.9(4) . . . . ?
C41 P6 C6 C5 -117.5(4) . . . . ?
C35 P6 C6 C5 136.6(4) . . . . ?
Ru1 P6 C6 C5 12.2(4) . . . . ?
C53 P7 C7 P8 83.9(3) . . . . ?
C47 P7 C7 P8 -167.0(3) . . . . ?
Ag5 P7 C7 P8 -52.7(3) . . . . ?
P7 C7 P8 C65 -76.7(3) . . . . ?
P7 C7 P8 C59 170.0(3) . . . . ?
P7 C7 P8 Ag3 47.4(3) . . . . ?
C77 P9 C9 P10 -83.8(3) . . . . ?
C71A P9 C9 P10 166.8(3) . . . . ?
Ag3 P9 C9 P10 38.5(3) . . . . ?
P9 C9 P10 C83 74.1(3) . . . . ?
P9 C9 P10 C89 -177.5(3) . . . . ?
P9 C9 P10 Ag4 -49.8(3) . . . . ?
C95 P11 C11 P12 174.8(3) . . . . ?
C101 P11 C11 P12 -77.0(3) . . . . ?
Ag4 P11 C11 P12 46.1(3) . . . . ?
P11 C11 P12 C107 81.9(3) . . . . ?
P11 C11 P12 C113 -171.0(3) . . . . ?
P11 C11 P12 Ag5 -45.8(3) . . . . ?
C17 C13 C14 C15 0.2(6) . . . . ?
C18 C13 C14 C15 -171.7(5) . . . . ?
Ru1 C13 C14 C15 64.1(4) . . . . ?
C17 C13 C14 C19 174.3(5) . . . . ?
C18 C13 C14 C19 2.4(9) . . . . ?
Ru1 C13 C14 C19 -121.9(5) . . . . ?
C17 C13 C14 Ru1 -63.8(4) . . . . ?
C18 C13 C14 Ru1 124.3(5) . . . . ?
C13 C14 C15 C16 -0.3(6) . . . . ?
C19 C14 C15 C16 -174.2(5) . . . . ?
Ru1 C14 C15 C16 62.6(4) . . . . ?
C13 C14 C15 C20 171.8(5) . . . . ?
C19 C14 C15 C20 -2.1(9) . . . . ?
Ru1 C14 C15 C20 -125.3(5) . . . . ?
C13 C14 C15 Ru1 -62.9(4) . . . . ?
C19 C14 C15 Ru1 123.2(6) . . . . ?
C14 C15 C16 C17 0.3(6) . . . . ?
C20 C15 C16 C17 -171.5(5) . . . . ?
Ru1 C15 C16 C17 61.7(3) . . . . ?
C14 C15 C16 C21 169.2(5) . . . . ?
C20 C15 C16 C21 -2.6(9) . . . . ?
Ru1 C15 C16 C21 -129.4(5) . . . . ?
C14 C15 C16 Ru1 -61.4(4) . . . . ?
C20 C15 C16 Ru1 126.7(5) . . . . ?
C14 C13 C17 C16 -0.1(6) . . . . ?
C18 C13 C17 C16 171.4(5) . . . . ?
Ru1 C13 C17 C16 -63.2(4) . . . . ?
C14 C13 C17 C22 -173.8(5) . . . . ?
C18 C13 C17 C22 -2.3(9) . . . . ?
Ru1 C13 C17 C22 123.1(5) . . . . ?
C14 C13 C17 Ru1 63.1(4) . . . . ?
C18 C13 C17 Ru1 -125.4(6) . . . . ?
C15 C16 C17 C13 -0.1(6) . . . . ?
C21 C16 C17 C13 -169.5(5) . . . . ?
Ru1 C16 C17 C13 62.1(4) . . . . ?
C15 C16 C17 C22 173.8(5) . . . . ?
C21 C16 C17 C22 4.4(8) . . . . ?
Ru1 C16 C17 C22 -124.0(5) . . . . ?
C15 C16 C17 Ru1 -62.2(3) . . . . ?
C21 C16 C17 Ru1 128.4(5) . . . . ?
C5 P5 C23 C24 -105.3(5) . . . . ?
C29 P5 C23 C24 148.7(5) . . . . ?
Ru1 P5 C23 C24 15.1(5) . . . . ?
C5 P5 C23 C28 73.2(5) . . . . ?
C29 P5 C23 C28 -32.7(5) . . . . ?
Ru1 P5 C23 C28 -166.4(4) . . . . ?
C28 C23 C24 C25 3.6(8) . . . . ?
P5 C23 C24 C25 -177.8(5) . . . . ?
C23 C24 C25 C26 -2.9(9) . . . . ?
C24 C25 C26 C27 0.3(9) . . . . ?
C25 C26 C27 C28 1.4(9) . . . . ?
C26 C27 C28 C23 -0.6(9) . . . . ?
C24 C23 C28 C27 -1.9(8) . . . . ?
P5 C23 C28 C27 179.5(4) . . . . ?
C23 P5 C29 C34 97.2(5) . . . . ?
C5 P5 C29 C34 -12.4(5) . . . . ?
Ru1 P5 C29 C34 -130.0(4) . . . . ?
C23 P5 C29 C30 -86.5(4) . . . . ?
C5 P5 C29 C30 163.9(4) . . . . ?
Ru1 P5 C29 C30 46.3(4) . . . . ?
C34 C29 C30 C31 0.9(7) . . . . ?
P5 C29 C30 C31 -175.7(4) . . . . ?
C29 C30 C31 C32 0.4(8) . . . . ?
C30 C31 C32 C33 -1.1(8) . . . . ?
C31 C32 C33 C34 0.4(8) . . . . ?
C30 C29 C34 C33 -1.5(8) . . . . ?
P5 C29 C34 C33 174.8(4) . . . . ?
C32 C33 C34 C29 0.8(8) . . . . ?
C41 P6 C35 C40 13.3(5) . . . . ?
C6 P6 C35 C40 120.0(5) . . . . ?
Ru1 P6 C35 C40 -118.0(4) . . . . ?
C41 P6 C35 C36 -171.8(4) . . . . ?
C6 P6 C35 C36 -65.1(5) . . . . ?
Ru1 P6 C35 C36 56.8(5) . . . . ?
C40 C35 C36 C37 1.0(8) . . . . ?
P6 C35 C36 C37 -174.1(4) . . . . ?
C35 C36 C37 C38 0.0(9) . . . . ?
C36 C37 C38 C39 -0.3(9) . . . . ?
C37 C38 C39 C40 -0.5(9) . . . . ?
C38 C39 C40 C35 1.5(9) . . . . ?
C36 C35 C40 C39 -1.8(8) . . . . ?
P6 C35 C40 C39 173.1(4) . . . . ?
C35 P6 C41 C46 59.5(5) . . . . ?
C6 P6 C41 C46 -47.8(5) . . . . ?
Ru1 P6 C41 C46 -172.1(4) . . . . ?
C35 P6 C41 C42 -119.7(4) . . . . ?
C6 P6 C41 C42 132.9(4) . . . . ?
Ru1 P6 C41 C42 8.7(5) . . . . ?
C46 C41 C42 C43 -0.2(8) . . . . ?
P6 C41 C42 C43 179.1(4) . . . . ?
C41 C42 C43 C44 -0.1(9) . . . . ?
C42 C43 C44 C45 0.2(9) . . . . ?
C43 C44 C45 C46 -0.1(9) . . . . ?
C42 C41 C46 C45 0.3(8) . . . . ?
P6 C41 C46 C45 -179.0(4) . . . . ?
C44 C45 C46 C41 -0.2(9) . . . . ?
C53 P7 C47 C52 1.1(5) . . . . ?
C7 P7 C47 C52 -109.2(5) . . . . ?
Ag5 P7 C47 C52 132.4(5) . . . . ?
C53 P7 C47 C48 -175.9(4) . . . . ?
C7 P7 C47 C48 73.8(5) . . . . ?
Ag5 P7 C47 C48 -44.7(5) . . . . ?
C52 C47 C48 C49 0.9(9) . . . . ?
P7 C47 C48 C49 178.0(5) . . . . ?
C47 C48 C49 C50 -1.2(10) . . . . ?
C48 C49 C50 C51 2.1(10) . . . . ?
C49 C50 C51 C52 -2.6(11) . . . . ?
C48 C47 C52 C51 -1.4(9) . . . . ?
P7 C47 C52 C51 -178.3(5) . . . . ?
C50 C51 C52 C47 2.3(10) . . . . ?
C7 P7 C53 C58 -154.2(4) . . . . ?
C47 P7 C53 C58 98.0(5) . . . . ?
Ag5 P7 C53 C58 -23.1(5) . . . . ?
C7 P7 C53 C54 28.4(5) . . . . ?
C47 P7 C53 C54 -79.4(5) . . . . ?
Ag5 P7 C53 C54 159.4(4) . . . . ?
C58 C53 C54 C55 -0.4(9) . . . . ?
P7 C53 C54 C55 177.1(5) . . . . ?
C53 C54 C55 C56 0.2(9) . . . . ?
C54 C55 C56 C57 -0.4(10) . . . . ?
C55 C56 C57 C58 0.9(10) . . . . ?
C54 C53 C58 C57 0.9(9) . . . . ?
P7 C53 C58 C57 -176.7(5) . . . . ?
C56 C57 C58 C53 -1.1(10) . . . . ?
C65 P8 C59 C64 122.3(4) . . . . ?
C7 P8 C59 C64 -127.6(4) . . . . ?
Ag3 P8 C59 C64 -5.9(4) . . . . ?
C65 P8 C59 C60 -63.2(5) . . . . ?
C7 P8 C59 C60 47.0(4) . . . . ?
Ag3 P8 C59 C60 168.6(3) . . . . ?
C64 C59 C60 C61 0.3(7) . . . . ?
P8 C59 C60 C61 -174.2(4) . . . . ?
C59 C60 C61 C62 0.8(8) . . . . ?
C60 C61 C62 C63 -0.8(8) . . . . ?
C61 C62 C63 C64 -0.5(8) . . . . ?
C60 C59 C64 C63 -1.6(7) . . . . ?
P8 C59 C64 C63 173.3(4) . . . . ?
C62 C63 C64 C59 1.7(8) . . . . ?
C59 P8 C65 C66 -151.6(5) . . . . ?
C7 P8 C65 C66 101.2(5) . . . . ?
Ag3 P8 C65 C66 -22.8(5) . . . . ?
C59 P8 C65 C70 30.2(6) . . . . ?
C7 P8 C65 C70 -77.0(5) . . . . ?
Ag3 P8 C65 C70 159.0(4) . . . . ?
C70 C65 C66 C67 0.8(11) . . . . ?
P8 C65 C66 C67 -177.6(6) . . . . ?
C65 C66 C67 C68 -2.1(13) . . . . ?
C66 C67 C68 C69 2.9(13) . . . . ?
C67 C68 C69 C70 -2.4(12) . . . . ?
C66 C65 C70 C69 -0.3(9) . . . . ?
P8 C65 C70 C69 177.9(5) . . . . ?
C68 C69 C70 C65 1.1(10) . . . . ?
C77 P9 C71A C72A 87.0(16) . . . . ?
C9 P9 C71A C72A -164.4(16) . . . . ?
Ag3 P9 C71A C72A -35.0(16) . . . . ?
C77 P9 C71A C76A -85(2) . . . . ?
C9 P9 C71A C76A 24(2) . . . . ?
Ag3 P9 C71A C76A 153(2) . . . . ?
C76A C71A C72A C73A -9(3) . . . . ?
P9 C71A C72A C73A 178.7(18) . . . . ?
C71A C72A C73A C74A -4(4) . . . . ?
C72A C73A C74A C75A 15(3) . . . . ?
C73A C74A C75A C76A -14(4) . . . . ?
C72A C71A C76A C75A 10(4) . . . . ?
P9 C71A C76A C75A -178(2) . . . . ?
C74A C75A C76A C71A 1(4) . . . . ?
C71A P9 C77 C82 -148.1(4) . . . . ?
C9 P9 C77 C82 105.2(4) . . . . ?
Ag3 P9 C77 C82 -22.2(4) . . . . ?
C71A P9 C77 C78 32.5(5) . . . . ?
C9 P9 C77 C78 -74.3(5) . . . . ?
Ag3 P9 C77 C78 158.3(4) . . . . ?
C82 C77 C78 C79 1.8(8) . . . . ?
P9 C77 C78 C79 -178.8(4) . . . . ?
C77 C78 C79 C80 -1.6(9) . . . . ?
C78 C79 C80 C81 0.5(10) . . . . ?
C79 C80 C81 C82 0.3(9) . . . . ?
C80 C81 C82 C77 0.0(8) . . . . ?
C78 C77 C82 C81 -1.0(8) . . . . ?
P9 C77 C82 C81 179.5(4) . . . . ?
C89 P10 C83 C84 -62.0(5) . . . . ?
C9 P10 C83 C84 42.3(5) . . . . ?
Ag4 P10 C83 C84 166.2(4) . . . . ?
C89 P10 C83 C88 118.5(4) . . . . ?
C9 P10 C83 C88 -137.2(4) . . . . ?
Ag4 P10 C83 C88 -13.3(4) . . . . ?
C88 C83 C84 C85 -0.3(8) . . . . ?
P10 C83 C84 C85 -179.8(4) . . . . ?
C83 C84 C85 C86 -0.9(9) . . . . ?
C84 C85 C86 C87 1.6(9) . . . . ?
C85 C86 C87 C88 -1.0(9) . . . . ?
C86 C87 C88 C83 -0.2(8) . . . . ?
C84 C83 C88 C87 0.9(7) . . . . ?
P10 C83 C88 C87 -179.6(4) . . . . ?
C83 P10 C89 C94 -6.5(5) . . . . ?
C9 P10 C89 C94 -115.1(5) . . . . ?
Ag4 P10 C89 C94 121.5(4) . . . . ?
C83 P10 C89 C90 173.9(4) . . . . ?
C9 P10 C89 C90 65.3(4) . . . . ?
Ag4 P10 C89 C90 -58.1(4) . . . . ?
C94 C89 C90 C91 2.1(7) . . . . ?
P10 C89 C90 C91 -178.3(4) . . . . ?
C89 C90 C91 C92 -1.6(8) . . . . ?
C90 C91 C92 C93 -1.0(8) . . . . ?
C91 C92 C93 C94 3.1(8) . . . . ?
C92 C93 C94 C89 -2.5(8) . . . . ?
C90 C89 C94 C93 -0.1(8) . . . . ?
P10 C89 C94 C93 -179.6(4) . . . . ?
C101 P11 C95 C96 -128.7(5) . . . . ?
C11 P11 C95 C96 -19.7(5) . . . . ?
Ag4 P11 C95 C96 107.4(4) . . . . ?
C101 P11 C95 C100 54.7(4) . . . . ?
C11 P11 C95 C100 163.7(4) . . . . ?
Ag4 P11 C95 C100 -69.3(4) . . . . ?
C100 C95 C96 C97 -0.3(8) . . . . ?
P11 C95 C96 C97 -177.0(4) . . . . ?
C95 C96 C97 C98 0.3(9) . . . . ?
C96 C97 C98 C99 0.2(9) . . . . ?
C97 C98 C99 C100 -0.7(9) . . . . ?
C98 C99 C100 C95 0.7(9) . . . . ?
C96 C95 C100 C99 -0.2(8) . . . . ?
P11 C95 C100 C99 176.7(4) . . . . ?
C95 P11 C101 C102 -142.4(4) . . . . ?
C11 P11 C101 C102 109.3(5) . . . . ?
Ag4 P11 C101 C102 -15.2(5) . . . . ?
C95 P11 C101 C106 37.4(5) . . . . ?
C11 P11 C101 C106 -70.9(5) . . . . ?
Ag4 P11 C101 C106 164.5(4) . . . . ?
C106 C101 C102 C103 0.7(9) . . . . ?
P11 C101 C102 C103 -179.5(5) . . . . ?
C101 C102 C103 C104 -0.6(10) . . . . ?
C102 C103 C104 C105 0.8(11) . . . . ?
C103 C104 C105 C106 -1.2(11) . . . . ?
C102 C101 C106 C105 -1.1(9) . . . . ?
P11 C101 C106 C105 179.1(5) . . . . ?
C104 C105 C106 C101 1.3(10) . . . . ?
C113 P12 C107 C112 117.3(5) . . . . ?
C11 P12 C107 C112 -134.9(5) . . . . ?
Ag5 P12 C107 C112 -6.2(5) . . . . ?
C113 P12 C107 C108 -61.1(6) . . . . ?
C11 P12 C107 C108 46.7(6) . . . . ?
Ag5 P12 C107 C108 175.5(5) . . . . ?
C112 C107 C108 C109 -0.2(10) . . . . ?
P12 C107 C108 C109 178.1(6) . . . . ?
C107 C108 C109 C110 -2.5(11) . . . . ?
C108 C109 C110 C111 3.4(11) . . . . ?
C109 C110 C111 C112 -1.8(11) . . . . ?
C108 C107 C112 C111 1.9(10) . . . . ?
P12 C107 C112 C111 -176.6(5) . . . . ?
C110 C111 C112 C107 -0.9(11) . . . . ?
C107 P12 C113 C118 -43.8(5) . . . . ?
C11 P12 C113 C118 -153.6(5) . . . . ?
Ag5 P12 C113 C118 79.8(5) . . . . ?
C107 P12 C113 C114 144.1(5) . . . . ?
C11 P12 C113 C114 34.4(5) . . . . ?
Ag5 P12 C113 C114 -92.2(5) . . . . ?
C118 C113 C114 C115 1.5(9) . . . . ?
P12 C113 C114 C115 173.6(5) . . . . ?
C113 C114 C115 C116 -0.1(11) . . . . ?
C114 C115 C116 C117 -1.2(12) . . . . ?
C115 C116 C117 C118 1.2(12) . . . . ?
C116 C117 C118 C113 0.2(11) . . . . ?
C114 C113 C118 C117 -1.6(9) . . . . ?
P12 C113 C118 C117 -173.9(5) . . . . ?
C133 O129 C130 C131 -22.2(12) . . . . ?
O129 C130 C131 C132 29.8(12) . . . . ?
C130 C131 C132 C133 -24.9(11) . . . . ?
C130 O129 C133 C132 6.3(12) . . . . ?
C131 C132 C133 O129 12.0(11) . . . . ?
C138 O134 C135 C136 -33.1(9) . . . . ?
O134 C135 C136 C137 32.6(9) . . . . ?
C135 C136 C137 C138 -18.9(9) . . . . ?
C135 O134 C138 C137 20.6(10) . . . . ?
C136 C137 C138 O134 -0.4(10) . . . . ?
C143 O139 C140 C141 -19(2) . . . . ?
O139 C140 C141 C142 26.7(15) . . . . ?
C140 C141 C142 C143 -26.4(14) . . . . ?
C140 O139 C143 C142 2(2) . . . . ?
C141 C142 C143 O139 15.1(19) . . . . ?
C148 O144 C145 C146 -11.3(7) . . . . ?
O144 C145 C146 C147 32.1(7) . . . . ?
C145 C146 C147 C148 -38.8(7) . . . . ?
C145 O144 C148 C147 -14.3(8) . . . . ?
C146 C147 C148 O144 33.2(7) . . . . ?
C153 O149 C150 C151 -50(2) . . . . ?
O149 C150 C151 C152 27(2) . . . . ?
C150 C151 C152 C153 6(3) . . . . ?
C151 C152 C153 O149 -31(2) . . . . ?
C150 O149 C153 C152 48(2) . . . . ?
C158 O154 C155 C156 3(3) . . . . ?
O154 C155 C156 C157 -12(4) . . . . ?
C155 C156 C157 C158 12(4) . . . . ?
C155 O154 C158 C157 5(4) . . . . ?
C156 C157 C158 O154 -10(5) . . . . ?
 
_refine_diff_density_max    1.527
_refine_diff_density_min   -0.938
_refine_diff_density_rms    0.127

_shelxl_version_number 2013-4

_shelx_res_file
;
REM  NZX03 in P-1
REM R1 =  0.0761 for  14159 Fo > 4sig(Fo)  and  0.1302 for all  22621 data
REM   1355 parameters refined using      6 restraints
REM Highest difference peak  1.798,  deepest hole -0.858,  1-sigma level  0.161
REM  NZX03 in P-1
REM R1 =  0.0617 for  17265 Fo > 4sig(Fo)  and  0.1080 for all  26131 data
REM   1460 parameters refined using      4 restraints
REM Highest difference peak  1.948,  deepest hole -0.945,  1-sigma level  0.139
REM  NZX03 in P-1
REM R1 =  0.0585 for  17265 Fo > 4sig(Fo)  and  0.1051 for all  26131 data
REM   1460 parameters refined using      5 restraints
REM Highest difference peak  1.531,  deepest hole -0.928,  1-sigma level  0.129
REM  NZX03 in P-1
REM R1 =  0.0585 for  17265 Fo > 4sig(Fo)  and  0.1051 for all  26131 data
REM   1460 parameters refined using      5 restraints
REM Highest difference peak  1.531,  deepest hole -0.928,  1-sigma level  0.129
REM  NZX03 in P-1
REM R1 =  0.0575 for  17265 Fo > 4sig(Fo)  and  0.1041 for all  26131 data
REM   1494 parameters refined using      5 restraints
REM Highest difference peak  1.527,  deepest hole -0.938,  1-sigma level  0.127
REM  NZX03 in P-1
REM R1 =  0.0575 for   17265 Fo > 4sig(Fo)  and  0.1041 for all   26131 data
REM   1497 parameters refined using     11 restraints
REM Highest difference peak  1.527,  deepest hole -0.938,  1-sigma level  0.127
TITL NZX03 in P-1
CELL 0.71073 18.5753 18.6769 20.2553 83.513 85.582 62.139
ZERR 2.0000 0.0009 0.0009 0.0010 0.004 0.004 0.005
LATT 1
SFAC C H F P RU AG B O
UNIT 270 290 16 16 2 6 4 10
MERG 2
FMAP 2
GRID
PLAN 20
TEMP -123
SIZE 0.38 0.19 0.04
BOND $H
CONF
EXYZ C71A C71B
EADP C71A C71B
EXYZ C74A C74B
EADP C74A C74B
ISOR O139
DFIX 1.54 0.02 C151 C152
DFIX -1.35 0.02 O149 C150
DFIX -1.35 0.02 O154 C158
DFIX -1.35 0.02 O154 C155
DFIX -1.5 0.02 C158 C157
DFIX -1.5 0.02 C156 C155
DFIX 1.54 0.02 C151 C152
DFIX 1.54 0.02 C156 C157
L.S. 20
ACTA 54
WGHT    0.061300   10.866100
FVAR       0.58884   0.44952   0.39247
RU1   5    0.356205    0.151433    0.681823    11.00000    0.01613    0.03152 =
         0.02134   -0.00385    0.00107   -0.01215
C1    1    0.451750    0.157031    0.712843    11.00000    0.01880    0.03424 =
         0.02096   -0.00431    0.00460   -0.01093
AG3   6    0.759602    0.110197    0.694793    11.00000    0.02085    0.03048 =
         0.02126   -0.00224    0.00400   -0.01231
C2    1    0.514567    0.156083    0.729640    11.00000    0.01883    0.03574 =
         0.02400   -0.00247    0.00185   -0.01279
AG4   6    0.723486    0.098245    0.852144    11.00000    0.02120    0.03164 =
         0.02163   -0.00130    0.00113   -0.01391
C3    1    0.584371    0.155430    0.746646    11.00000    0.01625    0.03092 =
         0.01908   -0.00353    0.00520   -0.01096
AG5   6    0.668020    0.262962    0.770724    11.00000    0.02551    0.02980 =
         0.02103   -0.00276    0.00268   -0.01557
C4    1    0.647335    0.154434    0.762221    11.00000    0.02219    0.03044 =
         0.01735   -0.00353    0.00516   -0.01266
P5    4    0.296339    0.200843    0.780274    11.00000    0.01952    0.03416 =
         0.02079   -0.00229    0.00093   -0.01343
C5    1    0.306340    0.293713    0.785658    11.00000    0.02249    0.03460 =
         0.02815   -0.01020    0.00546   -0.01358
AFIX  23
H5A   2    0.275237    0.321774    0.824883    11.00000   -1.20000
H5B   2    0.364238    0.279884    0.789861    11.00000   -1.20000
AFIX   0
P6    4    0.303324    0.286519    0.648958    11.00000    0.01974    0.03208 =
         0.02371   -0.00186    0.00248   -0.01477
C6    1    0.272411    0.348383    0.721675    11.00000    0.03177    0.03256 =
         0.02910   -0.00743    0.01021   -0.01976
AFIX  23
H6A   2    0.293115    0.388912    0.715013    11.00000   -1.20000
H6B   2    0.212234    0.378050    0.725548    11.00000   -1.20000
AFIX   0
P7    4    0.669798    0.346543    0.667378    11.00000    0.02587    0.02846 =
         0.02086   -0.00079    0.00043   -0.01600
C7    1    0.669857    0.299839    0.592556    11.00000    0.03362    0.02824 =
         0.02123   -0.00510    0.00215   -0.01988
AFIX  23
H7A   2    0.616412    0.300780    0.589976    11.00000   -1.20000
H7B   2    0.676419    0.332857    0.553020    11.00000   -1.20000
AFIX   0
P8    4    0.750213    0.195079    0.590038    11.00000    0.01977    0.02925 =
         0.01908   -0.00187    0.00326   -0.01257
P9    4    0.876243   -0.026430    0.710032    11.00000    0.01818    0.03186 =
         0.02028    0.00042    0.00402   -0.01110
C9    1    0.907744   -0.069372    0.795097    11.00000    0.02052    0.03254 =
         0.01901   -0.00048    0.00453   -0.01058
AFIX  23
H9A   2    0.943452   -0.048176    0.809307    11.00000   -1.20000
H9B   2    0.940434   -0.129095    0.795021    11.00000   -1.20000
AFIX   0
P10   4    0.823353   -0.047135    0.856524    11.00000    0.01919    0.03083 =
         0.01911   -0.00005    0.00278   -0.01116
P11   4    0.690441    0.165669    0.955876    11.00000    0.02416    0.03109 =
         0.02151   -0.00290    0.00274   -0.01680
C11   1    0.691439    0.264571    0.947750    11.00000    0.02899    0.03094 =
         0.02584   -0.00532    0.00370   -0.01628
AFIX  23
H11A  2    0.665790    0.293000    0.988147    11.00000   -1.20000
H11B  2    0.748583    0.255221    0.944511    11.00000   -1.20000
AFIX   0
P12   4    0.637461    0.329228    0.874853    11.00000    0.03220    0.03001 =
         0.02105   -0.00377    0.00368   -0.01759
C13   1    0.432020    0.062858    0.607603    11.00000    0.02473    0.03589 =
         0.03482   -0.01137    0.00482   -0.01436
C14   1    0.430301    0.018130    0.669832    11.00000    0.02880    0.02996 =
         0.03183   -0.01103    0.00074   -0.01002
C15   1    0.348955    0.032615    0.684710    11.00000    0.03292    0.02629 =
         0.02592   -0.00669    0.00022   -0.01202
C16   1    0.298465    0.086963    0.632251    11.00000    0.02278    0.03210 =
         0.02961   -0.00873    0.00158   -0.01287
C17   1    0.351001    0.105008    0.584802    11.00000    0.03628    0.03305 =
         0.02367   -0.00884    0.00123   -0.01895
C18   1    0.508354    0.054343    0.571318    11.00000    0.02900    0.05061 =
         0.05431   -0.02071    0.01727   -0.01888
AFIX 137
H18A  2    0.539002   -0.000683    0.556938    11.00000   -1.50000
H18B  2    0.541687    0.064039    0.600853    11.00000   -1.50000
H18C  2    0.494455    0.094088    0.532355    11.00000   -1.50000
AFIX   0
C19   1    0.504804   -0.040601    0.707722    11.00000    0.04171    0.04412 =
         0.04729   -0.00849   -0.00831   -0.01218
AFIX 137
H19A  2    0.488230   -0.059586    0.750426    11.00000   -1.50000
H19B  2    0.537032   -0.013351    0.715574    11.00000   -1.50000
H19C  2    0.537695   -0.087134    0.681855    11.00000   -1.50000
AFIX   0
C20   1    0.324444   -0.011599    0.740807    11.00000    0.05589    0.03874 =
         0.04223   -0.00451    0.00847   -0.02917
AFIX 137
H20A  2    0.351511   -0.069852    0.734811    11.00000   -1.50000
H20B  2    0.265255    0.009053    0.741363    11.00000   -1.50000
H20C  2    0.340515   -0.002951    0.782979    11.00000   -1.50000
AFIX   0
C21   1    0.211322    0.109143    0.620225    11.00000    0.02344    0.05122 =
         0.05006   -0.01096   -0.00588   -0.01759
AFIX 137
H21A  2    0.180384    0.168036    0.609745    11.00000   -1.50000
H21B  2    0.187514    0.092760    0.660208    11.00000   -1.50000
H21C  2    0.209291    0.081086    0.582888    11.00000   -1.50000
AFIX   0
C22   1    0.324107    0.153117    0.519257    11.00000    0.05537    0.04558 =
         0.02706   -0.00475   -0.00527   -0.02436
AFIX 137
H22A  2    0.360972    0.176070    0.503958    11.00000   -1.50000
H22B  2    0.268603    0.197250    0.524099    11.00000   -1.50000
H22C  2    0.325106    0.117583    0.486725    11.00000   -1.50000
AFIX   0
C23   1    0.335805    0.137104    0.856972    11.00000    0.02027    0.02879 =
         0.02842   -0.00384    0.00380   -0.01104
C24   1    0.411608    0.068707    0.857062    11.00000    0.03248    0.04389 =
         0.02822   -0.00418   -0.00359   -0.01226
AFIX  43
H24   2    0.443752    0.056324    0.817147    11.00000   -1.20000
AFIX   0
C25   1    0.440649    0.018452    0.914908    11.00000    0.03112    0.04801 =
         0.04168    0.00121   -0.01270   -0.00678
AFIX  43
H25   2    0.491426   -0.029385    0.913578    11.00000   -1.20000
AFIX   0
C26   1    0.397688    0.036365    0.973788    11.00000    0.03450    0.05172 =
         0.03234    0.01127   -0.00920   -0.02490
AFIX  43
H26   2    0.418398    0.001566    1.013149    11.00000   -1.20000
AFIX   0
C27   1    0.324405    0.105130    0.975291    11.00000    0.02397    0.06703 =
         0.02802    0.00888   -0.00238   -0.02376
AFIX  43
H27   2    0.294839    0.118554    1.016299    11.00000   -1.20000
AFIX   0
C28   1    0.292561    0.155548    0.918001    11.00000    0.02530    0.05776 =
         0.02610    0.00174   -0.00060   -0.01984
AFIX  43
H28   2    0.241320    0.202744    0.919983    11.00000   -1.20000
AFIX   0
C29   1    0.185532    0.238002    0.794875    11.00000    0.02370    0.02902 =
         0.02059    0.00444    0.00047   -0.00867
C30   1    0.152724    0.189529    0.777713    11.00000    0.02989    0.04639 =
         0.02778    0.00587   -0.00362   -0.02458
AFIX  43
H30   2    0.187289    0.137817    0.762145    11.00000   -1.20000
AFIX   0
C31   1    0.069241    0.217081    0.783443    11.00000    0.02822    0.05294 =
         0.02773    0.01058   -0.00625   -0.02719
AFIX  43
H31   2    0.047324    0.183424    0.771910    11.00000   -1.20000
AFIX   0
C32   1    0.017885    0.290984    0.805129    11.00000    0.01640    0.06103 =
         0.04024    0.02002    0.00080   -0.01360
AFIX  43
H32   2   -0.039222    0.309117    0.807972    11.00000   -1.20000
AFIX   0
C33   1    0.049861    0.339200    0.822923    11.00000    0.02421    0.04583 =
         0.03868    0.00635    0.00476   -0.00946
AFIX  43
H33   2    0.014596    0.390770    0.838437    11.00000   -1.20000
AFIX   0
C34   1    0.133739    0.312732    0.818290    11.00000    0.02676    0.04114 =
         0.03013   -0.00109    0.00175   -0.01608
AFIX  43
H34   2    0.155386    0.345994    0.831210    11.00000   -1.20000
AFIX   0
C35   1    0.209934    0.329144    0.600840    11.00000    0.02487    0.03240 =
         0.02683   -0.00633    0.00212   -0.01700
C36   1    0.143287    0.320658    0.629758    11.00000    0.02481    0.03626 =
         0.02995    0.00444   -0.00040   -0.01518
AFIX  43
H36   2    0.145627    0.298097    0.674474    11.00000   -1.20000
AFIX   0
C37   1    0.073440    0.344875    0.593819    11.00000    0.02887    0.05324 =
         0.03948    0.00469    0.00048   -0.02481
AFIX  43
H37   2    0.028415    0.338877    0.613911    11.00000   -1.20000
AFIX   0
C38   1    0.070025    0.377730    0.528659    11.00000    0.03175    0.04458 =
         0.04241    0.00553   -0.01623   -0.02020
AFIX  43
H38   2    0.022650    0.394147    0.503830    11.00000   -1.20000
AFIX   0
C39   1    0.135016    0.386573    0.499967    11.00000    0.04230    0.04593 =
         0.02851    0.00181   -0.00635   -0.02139
AFIX  43
H39   2    0.132519    0.408749    0.455117    11.00000   -1.20000
AFIX   0
C40   1    0.204254    0.363544    0.535626    11.00000    0.02848    0.03418 =
         0.03084    0.00177    0.00064   -0.01560
AFIX  43
H40   2    0.248252    0.371297    0.515391    11.00000   -1.20000
AFIX   0
C41   1    0.365715    0.325352    0.597572    11.00000    0.02103    0.04510 =
         0.02336   -0.00575    0.00214   -0.02217
C42   1    0.440641    0.269992    0.571962    11.00000    0.03212    0.05052 =
         0.02621   -0.00171    0.00023   -0.02311
AFIX  43
H42   2    0.459120    0.213258    0.581638    11.00000   -1.20000
AFIX   0
C43   1    0.488289    0.297925    0.532237    11.00000    0.03150    0.08582 =
         0.02863   -0.00172    0.00550   -0.03461
AFIX  43
H43   2    0.539457    0.260370    0.514714    11.00000   -1.20000
AFIX   0
C44   1    0.461116    0.380151    0.518366    11.00000    0.04279    0.09813 =
         0.03855    0.01226   -0.00390   -0.05236
AFIX  43
H44   2    0.493610    0.399267    0.491089    11.00000   -1.20000
AFIX   0
C45   1    0.386645    0.435296    0.543921    11.00000    0.05278    0.06588 =
         0.04858    0.02250   -0.01961   -0.04510
AFIX  43
H45   2    0.368346    0.491990    0.534155    11.00000   -1.20000
AFIX   0
C46   1    0.338682    0.407867    0.583789    11.00000    0.03555    0.04711 =
         0.03358    0.00349   -0.00294   -0.02441
AFIX  43
H46   2    0.287682    0.445599    0.601429    11.00000   -1.20000
AFIX   0
C47   1    0.570907    0.438279    0.664380    11.00000    0.02675    0.03216 =
         0.02235   -0.00461    0.00347   -0.01334
C48   1    0.502774    0.427104    0.679898    11.00000    0.02588    0.04071 =
         0.05708   -0.00911    0.00387   -0.01206
AFIX  43
H48   2    0.508111    0.373953    0.690023    11.00000   -1.20000
AFIX   0
C49   1    0.426481    0.494623    0.680476    11.00000    0.02813    0.04985 =
         0.06717   -0.01489    0.00115   -0.01608
AFIX  43
H49   2    0.379693    0.486761    0.690291    11.00000   -1.20000
AFIX   0
C50   1    0.416681    0.571861    0.667385    11.00000    0.03530    0.05170 =
         0.05241   -0.01926    0.00079   -0.00855
AFIX  43
H50   2    0.364148    0.617340    0.669451    11.00000   -1.20000
AFIX   0
C51   1    0.484960    0.582484    0.651031    11.00000    0.05110    0.03251 =
         0.07564   -0.00377    0.00984   -0.00957
AFIX  43
H51   2    0.479355    0.635609    0.639936    11.00000   -1.20000
AFIX   0
C52   1    0.562568    0.514824    0.650809    11.00000    0.03993    0.03047 =
         0.05736    0.00133    0.00326   -0.01385
AFIX  43
H52   2    0.609483    0.522502    0.641142    11.00000   -1.20000
AFIX   0
C53   1    0.743837    0.384624    0.650660    11.00000    0.02788    0.02989 =
         0.02412   -0.00285    0.00350   -0.01753
C54   1    0.762708    0.409057    0.587018    11.00000    0.04023    0.04091 =
         0.03770    0.00311    0.00444   -0.02618
AFIX  43
H54   2    0.738126    0.403742    0.549691    11.00000   -1.20000
AFIX   0
C55   1    0.816928    0.440990    0.577710    11.00000    0.04851    0.05352 =
         0.04198   -0.00004    0.00810   -0.03209
AFIX  43
H55   2    0.829379    0.457639    0.534149    11.00000   -1.20000
AFIX   0
C56   1    0.852666    0.448585    0.631387    11.00000    0.03012    0.04246 =
         0.07280    0.00424    0.00499   -0.02492
AFIX  43
H56   2    0.890149    0.470226    0.624774    11.00000   -1.20000
AFIX   0
C57   1    0.834825    0.425209    0.694687    11.00000    0.05048    0.06049 =
         0.05495    0.00005   -0.01081   -0.04029
AFIX  43
H57   2    0.859289    0.431369    0.731695    11.00000   -1.20000
AFIX   0
C58   1    0.780536    0.392326    0.704421    11.00000    0.03791    0.04765 =
         0.03539    0.00172   -0.00154   -0.02633
AFIX  43
H58   2    0.768822    0.375227    0.748069    11.00000   -1.20000
AFIX   0
C59   1    0.719309    0.164650    0.519056    11.00000    0.01873    0.03760 =
         0.01791   -0.00737    0.00779   -0.01304
C60   1    0.696651    0.212204    0.458079    11.00000    0.02857    0.03391 =
         0.02303   -0.00529    0.00429   -0.01388
AFIX  43
H60   2    0.701717    0.260815    0.450701    11.00000   -1.20000
AFIX   0
C61   1    0.666938    0.188350    0.408697    11.00000    0.03250    0.05015 =
         0.02654   -0.01268    0.00064   -0.01440
AFIX  43
H61   2    0.652301    0.220199    0.367288    11.00000   -1.20000
AFIX   0
C62   1    0.658575    0.117827    0.419796    11.00000    0.03306    0.06330 =
         0.03759   -0.02364    0.00652   -0.02602
AFIX  43
H62   2    0.637589    0.101785    0.386147    11.00000   -1.20000
AFIX   0
C63   1    0.680422    0.071639    0.478862    11.00000    0.03766    0.05207 =
         0.04253   -0.01685    0.01410   -0.02952
AFIX  43
H63   2    0.674214    0.023659    0.486349    11.00000   -1.20000
AFIX   0
C64   1    0.711631    0.094135    0.528095    11.00000    0.03160    0.03562 =
         0.02924   -0.00437    0.00790   -0.01843
AFIX  43
H64   2    0.727964    0.060597    0.568612    11.00000   -1.20000
AFIX   0
C65   1    0.842915    0.203460    0.567645    11.00000    0.02050    0.03088 =
         0.02842   -0.00341    0.00564   -0.01395
C66   1    0.894176    0.189460    0.618503    11.00000    0.04721    0.10436 =
         0.03669    0.01050   -0.00694   -0.05263
AFIX  43
H66   2    0.881166    0.174126    0.662325    11.00000   -1.20000
AFIX   0
C67   1    0.964909    0.197557    0.606330    11.00000    0.05920    0.14610 =
         0.06000    0.01405   -0.02119   -0.07314
AFIX  43
H67   2    0.999079    0.189536    0.641929    11.00000   -1.20000
AFIX   0
C68   1    0.985093    0.217180    0.542677    11.00000    0.03182    0.07637 =
         0.06305   -0.00701    0.00705   -0.03583
AFIX  43
H68   2    1.034564    0.220317    0.533842    11.00000   -1.20000
AFIX   0
C69   1    0.934753    0.231990    0.492739    11.00000    0.04104    0.08789 =
         0.03861   -0.01532    0.01896   -0.04248
AFIX  43
H69   2    0.948006    0.247602    0.449093    11.00000   -1.20000
AFIX   0
C70   1    0.863575    0.224679    0.504361    11.00000    0.02853    0.07305 =
         0.02846   -0.00609    0.00932   -0.02998
AFIX  43
H70   2    0.829104    0.234347    0.468555    11.00000   -1.20000
PART 1
AFIX   0
C71A  1    0.972460   -0.038940    0.669617    31.00000    0.01554    0.03410 =
         0.02954    0.00187    0.00781   -0.00828
C72A  1    0.969006    0.004219    0.609506    31.00000    0.03337    0.03114 =
         0.07513    0.02768    0.01759    0.00753
AFIX  43
H72A  2    0.917817    0.038240    0.589870    31.00000   -1.20000
AFIX   0
C73A  1    1.041871   -0.001686    0.576285    31.00000    0.05342    0.05402 =
         0.08348    0.01136    0.05179   -0.01079
AFIX  43
H73A  2    1.039700    0.025800    0.533475    31.00000   -1.20000
AFIX   0
C74A  1    1.113158   -0.046131    0.605800    31.00000    0.03017    0.06656 =
         0.06344   -0.00462    0.02121   -0.02469
AFIX  43
H74A  2    1.159757   -0.040425    0.589634    31.00000   -1.20000
AFIX   0
C75A  1    1.119089   -0.102145    0.661626    31.00000    0.04137    0.18559 =
         0.04030    0.02566   -0.00428   -0.05993
AFIX  43
H75A  2    1.170851   -0.142319    0.676920    31.00000   -1.20000
AFIX   0
C76A  1    1.047094   -0.097104    0.693823    31.00000    0.01755    0.15258 =
         0.06343    0.06105    0.01693   -0.01580
AFIX  43
H76A  2    1.049691   -0.133158    0.731683    31.00000   -1.20000
PART 2
AFIX   0
C71B  1    0.972460   -0.038940    0.669617   -31.00000    0.01554    0.03410 =
         0.02954    0.00187    0.00781   -0.00828
C72B  1    0.984519   -0.044846    0.604108   -31.00000    0.03069    0.06461 =
         0.03286   -0.00914    0.01220   -0.02643
AFIX  43
H72B  2    0.943640   -0.045431    0.579059   -31.00000   -1.20000
AFIX   0
C73B  1    1.055334   -0.050149    0.571752   -31.00000    0.05949    0.06150 =
         0.03632   -0.00487    0.02394   -0.03674
AFIX  43
H73B  2    1.063270   -0.056632    0.525480   -31.00000   -1.20000
AFIX   0
C74B  1    1.113158   -0.046131    0.605800   -31.00000    0.03017    0.06656 =
         0.06344   -0.00462    0.02121   -0.02469
AFIX  43
H74B  2    1.162315   -0.051550    0.583877   -31.00000   -1.20000
AFIX   0
C75B  1    1.100505   -0.034458    0.670622   -31.00000    0.04186    0.10135 =
         0.06380   -0.00292    0.00618   -0.05384
AFIX  43
H75B  2    1.139749   -0.028713    0.693889   -31.00000   -1.20000
AFIX   0
C76B  1    1.030457   -0.030593    0.704592   -31.00000    0.03971    0.07491 =
         0.03409    0.00452    0.00122   -0.03342
AFIX  43
H76B  2    1.022103   -0.022457    0.750579   -31.00000   -1.20000
PART 0
AFIX   0
C77   1    0.854132   -0.100100    0.676348    11.00000    0.02864    0.02694 =
         0.01942   -0.00084    0.00598   -0.01426
C78   1    0.915524   -0.174737    0.657919    11.00000    0.03476    0.03576 =
         0.03711   -0.00181    0.00828   -0.01576
AFIX  43
H78   2    0.971181   -0.189426    0.663458    11.00000   -1.20000
AFIX   0
C79   1    0.893945   -0.227096    0.631389    11.00000    0.05217    0.03751 =
         0.04840   -0.01409    0.02156   -0.01835
AFIX  43
H79   2    0.935366   -0.277416    0.617684    11.00000   -1.20000
AFIX   0
C80   1    0.813818   -0.207364    0.624645    11.00000    0.07392    0.04974 =
         0.04170   -0.00823    0.00637   -0.03931
AFIX  43
H80   2    0.799933   -0.244019    0.606728    11.00000   -1.20000
AFIX   0
C81   1    0.753863   -0.134723    0.643789    11.00000    0.04214    0.05125 =
         0.03677   -0.00048   -0.00600   -0.02826
AFIX  43
H81   2    0.698344   -0.121295    0.639257    11.00000   -1.20000
AFIX   0
C82   1    0.773137   -0.080801    0.669584    11.00000    0.02915    0.03783 =
         0.02353   -0.00047    0.00455   -0.01561
AFIX  43
H82   2    0.731039   -0.030503    0.682711    11.00000   -1.20000
AFIX   0
C83   1    0.779096   -0.111802    0.840026    11.00000    0.02563    0.03674 =
         0.01637    0.00355   -0.00257   -0.01672
C84   1    0.824957   -0.191605    0.826369    11.00000    0.03033    0.03959 =
         0.02972   -0.00100    0.00259   -0.01701
AFIX  43
H84   2    0.882737   -0.215492    0.825337    11.00000   -1.20000
AFIX   0
C85   1    0.786877   -0.237220    0.814101    11.00000    0.06087    0.03903 =
         0.03837   -0.00680    0.00583   -0.02965
AFIX  43
H85   2    0.818909   -0.292040    0.804079    11.00000   -1.20000
AFIX   0
C86   1    0.703502   -0.204080    0.816275    11.00000    0.05350    0.06055 =
         0.03478   -0.00566    0.00277   -0.04014
AFIX  43
H86   2    0.678023   -0.236197    0.808913    11.00000   -1.20000
AFIX   0
C87   1    0.657207   -0.124459    0.829113    11.00000    0.03361    0.06215 =
         0.03169    0.00356   -0.00176   -0.02903
AFIX  43
H87   2    0.599469   -0.101126    0.829914    11.00000   -1.20000
AFIX   0
C88   1    0.693966   -0.077969    0.840886    11.00000    0.02141    0.03681 =
         0.02426   -0.00057    0.00119   -0.01165
AFIX  43
H88   2    0.661417   -0.022747    0.849619    11.00000   -1.20000
AFIX   0
C89   1    0.881756   -0.095855    0.931277    11.00000    0.01757    0.03218 =
         0.02107    0.00261   -0.00035   -0.00865
C90   1    0.929406   -0.063064    0.952046    11.00000    0.02481    0.03419 =
         0.02741   -0.00180    0.00157   -0.01676
AFIX  43
H90   2    0.929126   -0.016224    0.927995    11.00000   -1.20000
AFIX   0
C91   1    0.976887   -0.098461    1.007375    11.00000    0.03270    0.04797 =
         0.02612   -0.00317   -0.00152   -0.02030
AFIX  43
H91   2    1.010084   -0.076556    1.020400    11.00000   -1.20000
AFIX   0
C92   1    0.976519   -0.165241    1.043826    11.00000    0.03279    0.05935 =
         0.01913    0.00375   -0.00350   -0.02088
AFIX  43
H92   2    1.009958   -0.189821    1.081378    11.00000   -1.20000
AFIX   0
C93   1    0.926932   -0.196390    1.025303    11.00000    0.03261    0.05479 =
         0.02550    0.00080    0.00233   -0.02255
AFIX  43
H93   2    0.924407   -0.240729    1.051488    11.00000   -1.20000
AFIX   0
C94   1    0.881220   -0.162908    0.968764    11.00000    0.02515    0.03721 =
         0.02771    0.00114   -0.00134   -0.01533
AFIX  43
H94   2    0.849151   -0.185883    0.955382    11.00000   -1.20000
AFIX   0
C95   1    0.755050    0.110307    1.026122    11.00000    0.02931    0.03688 =
         0.01740   -0.00747    0.00778   -0.01776
C96   1    0.811357    0.129869    1.049417    11.00000    0.03522    0.04452 =
         0.02908    0.00181    0.00132   -0.02466
AFIX  43
H96   2    0.816056    0.176199    1.029742    11.00000   -1.20000
AFIX   0
C97   1    0.860820    0.081870    1.101409    11.00000    0.03356    0.05546 =
         0.03059   -0.00218   -0.00819   -0.02058
AFIX  43
H97   2    0.899061    0.095841    1.117225    11.00000   -1.20000
AFIX   0
C98   1    0.855287    0.014262    1.130423    11.00000    0.03746    0.05941 =
         0.02510    0.00256   -0.00147   -0.01635
AFIX  43
H98   2    0.889341   -0.018139    1.166104    11.00000   -1.20000
AFIX   0
C99   1    0.799920   -0.006039    1.107273    11.00000    0.04395    0.04669 =
         0.03033    0.00960    0.00337   -0.01818
AFIX  43
H99   2    0.796144   -0.052932    1.126731    11.00000   -1.20000
AFIX   0
C100  1    0.750171    0.041440    1.056093    11.00000    0.02999    0.03663 =
         0.03767   -0.00143    0.00352   -0.02017
AFIX  43
H100  2    0.711828    0.027231    1.040823    11.00000   -1.20000
AFIX   0
C101  1    0.587889    0.188112    0.988595    11.00000    0.02981    0.03546 =
         0.02579   -0.00123    0.00650   -0.02055
C102  1    0.534860    0.184522    0.947027    11.00000    0.03150    0.05000 =
         0.03902    0.00092    0.00066   -0.02416
AFIX  43
H102  2    0.551885    0.170299    0.902861    11.00000   -1.20000
AFIX   0
C103  1    0.456085    0.201719    0.969544    11.00000    0.03232    0.07112 =
         0.05745    0.00968   -0.00639   -0.03172
AFIX  43
H103  2    0.419267    0.199701    0.940646    11.00000   -1.20000
AFIX   0
C104  1    0.431985    0.221444    1.033139    11.00000    0.02740    0.06106 =
         0.07101    0.00085    0.01591   -0.02179
AFIX  43
H104  2    0.378474    0.232456    1.048466    11.00000   -1.20000
AFIX   0
C105  1    0.484388    0.225598    1.075487    11.00000    0.04433    0.06611 =
         0.05031   -0.00919    0.02665   -0.02363
AFIX  43
H105  2    0.466905    0.240353    1.119474    11.00000   -1.20000
AFIX   0
C106  1    0.563485    0.207847    1.052921    11.00000    0.03420    0.05586 =
         0.03936   -0.01182    0.00796   -0.02076
AFIX  43
H106  2    0.600466    0.209381    1.081935    11.00000   -1.20000
AFIX   0
C107  1    0.529762    0.377131    0.899474    11.00000    0.03508    0.03134 =
         0.02738   -0.00223    0.00167   -0.01535
C108  1    0.500500    0.412665    0.958366    11.00000    0.05151    0.06658 =
         0.03958   -0.02144    0.00784   -0.01687
AFIX  43
H108  2    0.537626    0.411324    0.988815    11.00000   -1.20000
AFIX   0
C109  1    0.417901    0.450241    0.973792    11.00000    0.05130    0.07136 =
         0.05689   -0.02822    0.02689   -0.01954
AFIX  43
H109  2    0.399007    0.472534    1.015358    11.00000   -1.20000
AFIX   0
C110  1    0.363273    0.455469    0.929499    11.00000    0.04111    0.05031 =
         0.06543   -0.00512    0.01862   -0.01899
AFIX  43
H110  2    0.306402    0.483829    0.939030    11.00000   -1.20000
AFIX   0
C111  1    0.391134    0.419851    0.872085    11.00000    0.03655    0.07092 =
         0.07242   -0.01535   -0.00739   -0.02027
AFIX  43
H111  2    0.353503    0.422002    0.841736    11.00000   -1.20000
AFIX   0
C112  1    0.475104    0.379607    0.856587    11.00000    0.03626    0.05433 =
         0.04646   -0.01473    0.00001   -0.01503
AFIX  43
H112  2    0.493861    0.354131    0.816306    11.00000   -1.20000
AFIX   0
C113  1    0.661783    0.413769    0.870944    11.00000    0.04937    0.03430 =
         0.02213   -0.00240    0.00766   -0.02618
C114  1    0.737015    0.402758    0.889713    11.00000    0.05592    0.03998 =
         0.05150    0.00590   -0.01015   -0.03308
AFIX  43
H114  2    0.775654    0.351613    0.909305    11.00000   -1.20000
AFIX   0
C115  1    0.754864    0.468067    0.879306    11.00000    0.08123    0.06867 =
         0.06710    0.00473   -0.01777   -0.05661
AFIX  43
H115  2    0.806094    0.460938    0.892121    11.00000   -1.20000
AFIX   0
C116  1    0.700575    0.541361    0.851306    11.00000    0.10751    0.05546 =
         0.06379    0.00222   -0.01149   -0.06192
AFIX  43
H116  2    0.713343    0.585392    0.845414    11.00000   -1.20000
AFIX   0
C117  1    0.627411    0.551687    0.831584    11.00000    0.09443    0.04452 =
         0.06196    0.01125   -0.01351   -0.03968
AFIX  43
H117  2    0.589650    0.602727    0.811159    11.00000   -1.20000
AFIX   0
C118  1    0.608245    0.488525    0.841181    11.00000    0.05559    0.04772 =
         0.04431    0.00511   -0.00835   -0.02827
AFIX  43
H118  2    0.557240    0.496412    0.827089    11.00000   -1.20000
AFIX   0
B119  7    0.887042    0.157247    0.827545    11.00000    0.02777    0.05049 =
         0.03593    0.00191    0.00113   -0.02688
F120  3    0.833270    0.156477    0.785470    11.00000    0.04141    0.12458 =
         0.05088   -0.02580   -0.00084   -0.04773
F121  3    0.878383    0.232052    0.828250    11.00000    0.12145    0.07727 =
         0.17147    0.02438   -0.06283   -0.06708
F122  3    0.963899    0.106151    0.811354    11.00000    0.02910    0.16244 =
         0.12917   -0.06890    0.00248   -0.02365
F123  3    0.868564    0.135557    0.889932    11.00000    0.07294    0.16350 =
         0.05294    0.02621   -0.00146   -0.06324
B124  7    0.189974    0.634131    0.655598    11.00000    0.03279    0.07409 =
         0.08838    0.01017   -0.00098   -0.01373
F125  3    0.226720    0.577045    0.706128    11.00000    0.04045    0.10786 =
         0.12621    0.05374   -0.00185   -0.02392
F126  3    0.224761    0.685349    0.644748    11.00000    0.07339    0.11577 =
         0.13478    0.04273   -0.02275   -0.05960
F127  3    0.108524    0.680755    0.668584    11.00000    0.03948    0.07653 =
         0.11989    0.00058   -0.00313   -0.01250
F128  3    0.198871    0.595294    0.600506    11.00000    0.14932    0.09800 =
         0.11663   -0.03833   -0.01029    0.01696
O129  8    0.149445    0.577219    0.933022    11.00000    0.10803    0.10770 =
         0.10418    0.00487   -0.00890   -0.03260
C130  1    0.139956    0.585275    0.863330    11.00000    0.10421    0.10342 =
         0.11384   -0.03569   -0.03392   -0.02490
AFIX  23
H13A  2    0.118320    0.549289    0.851098    11.00000   -1.20000
H13B  2    0.192720    0.571260    0.839381    11.00000   -1.20000
AFIX   0
C131  1    0.081546    0.671613    0.847095    11.00000    0.09065    0.08964 =
         0.12763   -0.00348   -0.05842   -0.01546
AFIX  23
H13C  2    0.025001    0.679193    0.849977    11.00000   -1.20000
H13D  2    0.092549    0.690304    0.801535    11.00000   -1.20000
AFIX   0
C132  1    0.093204    0.717549    0.896537    11.00000    0.06204    0.08318 =
         0.06909   -0.01620    0.01852   -0.02933
AFIX  23
H13E  2    0.040905    0.763504    0.909364    11.00000   -1.20000
H13F  2    0.131936    0.738390    0.879627    11.00000   -1.20000
AFIX   0
C133  1    0.127842    0.652962    0.954054    11.00000    0.10522    0.09672 =
         0.07559   -0.02174   -0.02172    0.01198
AFIX  23
H13G  2    0.176284    0.653542    0.970695    11.00000   -1.20000
H13H  2    0.086710    0.664478    0.990839    11.00000   -1.20000
AFIX   0
O134  8    0.615623    0.713502    0.731146    11.00000    0.10032    0.10140 =
         0.05781   -0.00577    0.00366   -0.06619
C135  1    0.544034    0.745728    0.694804    11.00000    0.06146    0.08394 =
         0.11055   -0.03029    0.03426   -0.04351
AFIX  23
H13I  2    0.504173    0.799307    0.709574    11.00000   -1.20000
H13J  2    0.518989    0.708777    0.701214    11.00000   -1.20000
AFIX   0
C136  1    0.567914    0.754178    0.624389    11.00000    0.07973    0.08113 =
         0.05977   -0.01803   -0.01099   -0.03808
AFIX  23
H13K  2    0.568190    0.807005    0.612951    11.00000   -1.20000
H13L  2    0.530306    0.749900    0.594836    11.00000   -1.20000
AFIX   0
C137  1    0.651256    0.685577    0.618573    11.00000    0.07476    0.08630 =
         0.06815   -0.01397    0.02345   -0.04815
AFIX  23
H13M  2    0.687660    0.702944    0.591011    11.00000   -1.20000
H13N  2    0.650397    0.639747    0.599020    11.00000   -1.20000
AFIX   0
C138  1    0.677678    0.662532    0.689345    11.00000    0.05033    0.14180 =
         0.08286    0.02534   -0.00303   -0.03039
AFIX  23
H13O  2    0.690046    0.605281    0.702119    11.00000   -1.20000
H13P  2    0.727729    0.667612    0.693981    11.00000   -1.20000
AFIX   0
O139  8    0.878875    0.633512    1.018629    11.00000    0.41836    0.48592 =
         0.14674   -0.03091   -0.00499   -0.39154
C140  1    0.919199    0.601743    0.954091    11.00000    0.13220    0.21707 =
         0.21103    0.10798   -0.05386   -0.11603
AFIX  23
H14A  2    0.915728    0.646663    0.921266    11.00000   -1.20000
H14B  2    0.977267    0.562194    0.960302    11.00000   -1.20000
AFIX   0
C141  1    0.875517    0.563329    0.932540    11.00000    0.12163    0.08484 =
         0.13614   -0.02548    0.05109   -0.06740
AFIX  23
H14C  2    0.901146    0.504743    0.947941    11.00000   -1.20000
H14D  2    0.872330    0.569638    0.883501    11.00000   -1.20000
AFIX   0
C142  1    0.796672    0.606217    0.963316    11.00000    0.11360    0.11217 =
         0.07777   -0.01584    0.00350   -0.05924
AFIX  23
H14E  2    0.772395    0.569053    0.974989    11.00000   -1.20000
H14F  2    0.760306    0.651416    0.932135    11.00000   -1.20000
AFIX   0
C143  1    0.804925    0.637967    1.022803    11.00000    0.16805    0.13497 =
         0.17639   -0.09461    0.01003   -0.02117
AFIX  23
H14G  2    0.762474    0.695031    1.025147    11.00000   -1.20000
H14H  2    0.799447    0.605210    1.062989    11.00000   -1.20000
AFIX   0
O144  8    0.046952    0.434410    0.355805    11.00000    0.05838    0.06911 =
         0.05359   -0.00628   -0.01450   -0.03263
C145  1   -0.038046    0.455908    0.357620    11.00000    0.05609    0.05294 =
         0.05480   -0.01278    0.00419   -0.02367
AFIX  23
H14I  2   -0.069909    0.504374    0.382504    11.00000   -1.20000
H14J  2   -0.047209    0.410443    0.379145    11.00000   -1.20000
AFIX   0
C146  1   -0.062191    0.473631    0.286434    11.00000    0.04161    0.06857 =
         0.05986    0.00937   -0.00572   -0.01869
AFIX  23
H14K  2   -0.078191    0.531056    0.270650    11.00000   -1.20000
H14L  2   -0.107823    0.461866    0.280136    11.00000   -1.20000
AFIX   0
C147  1    0.014740    0.416467    0.250767    11.00000    0.05643    0.07698 =
         0.05542   -0.01327   -0.00528   -0.03716
AFIX  23
H14M  2    0.016223    0.435475    0.203274    11.00000   -1.20000
H14N  2    0.021560    0.360335    0.254619    11.00000   -1.20000
AFIX   0
C148  1    0.077584    0.422923    0.289960    11.00000    0.03905    0.07495 =
         0.06360   -0.01557    0.00458   -0.02738
AFIX  23
H14O  2    0.130120    0.372629    0.288716    11.00000   -1.20000
H14P  2    0.086497    0.469417    0.270828    11.00000   -1.20000
PART 1
AFIX   0
O149  8    0.731314    0.254759    1.209489    21.00000    0.07417
C150  1    0.696864    0.202503    1.214523    21.00000    0.06152
AFIX  23
H15A  2    0.714144    0.169426    1.175954    21.00000   -1.20000
H15B  2    0.714255    0.165392    1.255639    21.00000   -1.20000
AFIX   0
C151  1    0.621161    0.245635    1.215792    21.00000    0.05465
AFIX  23
H15C  2    0.600581    0.251814    1.262443    21.00000   -1.20000
H15D  2    0.595124    0.219054    1.194090    21.00000   -1.20000
AFIX   0
C152  1    0.599364    0.329278    1.179504    21.00000    0.11148
AFIX  23
H15E  2    0.576177    0.372371    1.210648    21.00000   -1.20000
H15F  2    0.560156    0.342643    1.144000    21.00000   -1.20000
AFIX   0
C153  1    0.684481    0.318088    1.149647    21.00000    0.09825
AFIX  23
H15G  2    0.690287    0.368406    1.146966    21.00000   -1.20000
H15H  2    0.698499    0.294502    1.106235    21.00000   -1.20000
PART 2
AFIX   0
O154  8    0.591276    0.288542    1.186222   -21.00000    0.09933
C155  1    0.608950    0.351608    1.156870   -21.00000    0.08597
AFIX  23
H15I  2    0.573695    0.403433    1.176600   -21.00000   -1.20000
H15J  2    0.601262    0.359798    1.108269   -21.00000   -1.20000
AFIX   0
C156  1    0.696239    0.321810    1.172240   -21.00000    0.10109
AFIX  23
H15K  2    0.700686    0.367784    1.188106   -21.00000   -1.20000
H15L  2    0.727864    0.309357    1.129734   -21.00000   -1.20000
AFIX   0
C157  1    0.739799    0.247139    1.222957   -21.00000    0.33943
AFIX  23
H15M  2    0.746426    0.260674    1.267218   -21.00000   -1.20000
H15N  2    0.791221    0.203556    1.205914   -21.00000   -1.20000
AFIX   0
C158  1    0.656856    0.233164    1.217141   -21.00000    0.15939
AFIX  23
H15O  2    0.675372    0.182259    1.195479   -21.00000   -1.20000
H15P  2    0.639233    0.223073    1.263093   -21.00000   -1.20000
AFIX   0
HKLF 4

REM  NZX03 in P-1
REM R1 =  0.0575 for   17265 Fo > 4sig(Fo)  and  0.1041 for all   26131 data
REM   1497 parameters refined using     11 restraints

END

WGHT      0.0613     10.8896

REM Highest difference peak  1.527,  deepest hole -0.938,  1-sigma level  0.127
Q1    1   0.3228  0.2176  0.6703  11.00000  0.05    1.53
Q2    1   0.7002  0.1607  0.8525  11.00000  0.05    1.46
Q3    1   0.6801  0.2081  0.7594  11.00000  0.05    1.45
Q4    1   0.7634  0.0333  0.8585  11.00000  0.05    1.41
Q5    1   0.6393  0.3226  0.7622  11.00000  0.05    1.38
Q6    1   0.7823  0.0509  0.6856  11.00000  0.05    1.33
Q7    1   0.7440  0.0425  0.8454  11.00000  0.05    1.27
Q8    1   0.7376  0.1705  0.6948  11.00000  0.05    1.27
Q9    1   0.6623  0.3130  0.7866  11.00000  0.05    1.19
Q10   1   0.3835  0.0927  0.6806  11.00000  0.05    1.18
Q11   1   0.7193  0.2639  0.6133  11.00000  0.05    1.01
Q12   1   0.4462  0.0030  0.6085  11.00000  0.05    0.98
Q13   1   0.2634  0.3109  0.7568  11.00000  0.05    0.95
Q14   1   0.2002  0.4782  0.8373  11.00000  0.05    0.92
Q15   1   0.8462  0.6699  1.0237  11.00000  0.05    0.90
Q16   1   0.7632  0.1114  0.6494  11.00000  0.05    0.88
Q17   1   0.8730 -0.0590  1.1348  11.00000  0.05    0.88
Q18   1   0.6666  0.2634  0.8158  11.00000  0.05    0.87
Q19   1   0.3022  0.3184  0.6007  11.00000  0.05    0.85
Q20   1   0.3595  0.1241  0.7311  11.00000  0.05    0.85
;
_shelx_res_checksum    4075

_shelx_hkl_file
;
   0   0  -3 13294.5 332.073   1
   0   0  -3 13379.1 349.675  10
   0   0  -3 13143.9 370.512   9
   0   0   3 12943.4 370.262   9
   0   0  -3 12249.7 341.218   6
   0   0   3 13096.2 346.022  10
   0   0   3 14534.9 307.489   7
   0   0   3 13917.5 335.930   1
   0   0   4 12727.1 301.771   7
   0   0  -4 10596.7 341.408   6
   0   0   4 12774.2 357.026  10
   0   0   4 13094.5 342.873   1
   0   0  -4 11197.9 352.079  10
   0   0   4 12736.6 390.001   9
   0   0  -4 12231.6 385.432   9
   0   0  -4 12464.6 337.621   1
   0   0  -5 89.0410 53.3855  10
   0   0   5 185.495 54.4944  10
   0   0  -5 56.8157 55.2452   9
   0   0  -5 189.918 47.3978   1
   0   0   5 98.0830 30.0191   7
   0   0  -5 84.6445 51.4258   6
   0   0   5 146.871 46.1446   1
   0   0   5 67.0626 49.7771   9
   0   0   6 25302.8 659.082  10
   0   0   6 25123.0 712.355   9
   0   0   6 24854.5 567.210   7
   0   0  -6 24836.1 651.840   6
   0   0  -6 25458.2 629.999   1
   0   0  -6 22533.9 649.106  10
   0   0   6 24945.1 627.584   1
   0   0  -6 22860.9 692.560   9
   0   0   7 850.162 74.5365   7
   0   0   7 839.630 100.524   1
   0   0  -7 589.693 106.786   9
   0   0   7 786.790 118.345   9
   0   0   7 730.833 95.8813  10
   0   0  -7 880.651 94.7781   1
   0   0  -7 861.063 107.486   6
   0   0  -7 783.182 104.958  10
   0   0   8 4972.93 265.943  10
   0   0   8 5001.67 204.603   7
   0   0  -8 5317.43 254.900   1
   0   0   8 4693.93 245.086   1
   0   0  -8 4776.20 271.710  10
   0   0  -8 4796.38 262.519   6
   0   0   8 5028.69 307.205   9
   0   0  -8 4407.58 289.314   9
   0   0  -9 86.7022 59.4228  10
   0   0  -9 16.8543 50.7881   6
   0   0   9 11.1359 28.8616   7
   0   0   9-2.17267 51.8998   1
   0   0   9 4.76934 44.0439  10
   0   0  -9-75.4381 83.7737   9
   0   0 -10 21.1335 54.0287   6
   0   0  10 51.4603 40.9713   7
   0   0  10-20.5594 54.3840   1
   0   0 -10-67.9414 80.1809  10
   0   0 -10 26.2355 76.8213   9
   0   0  11 31524.0 784.606   7
   0   0 -11 31433.9 949.794  10
   0   0 -11 32240.2 923.247   6
   0   0  11 29834.4 882.207   1
   0   0  12 611.786 114.836   1
   0   0 -12 514.962 116.127   6
   0   0 -12 529.196 123.874  10
   0   0  12 507.265 79.4838   7
   0   0  13 3469.25 265.074   1
   0   0  13 3653.88 218.395   7
   0   0 -13 3873.17 304.893  10
   0   0 -13 4028.80 295.112   6
   0   0 -14 54.5346 78.9078  10
   0   0 -14 29.3302 59.9648   6
   0   0  14 41.7205 53.5053   1
   0   0 -15 646.526 138.816   6
   0   0  15 602.839 125.841   1
   0   0 -15 558.828 127.682  10
   0   0 -16 1557.89 225.367  10
   0   0  16 1660.22 205.126   1
   0   0 -16 1303.12 189.389   6
   0   0 -17 56.3199 81.6612  10
   0   0 -17-31.1254 62.3988   6
   0   0  17 99.9941 88.1943   1
   0   0 -18 617.622 161.557  10
   0   0 -18 271.124 105.163   6
   0   0  18 441.928 125.278   1
   0   0  19 350.960 112.478   1
   0   0 -19 477.029 154.131  10
   0   0 -19 508.963 140.021   6
   0   0 -20-21.8908 89.3481  10
   0   0  20-92.3737 99.0454   1
   0   0 -20 14.3048 89.5184   6
   0   0  21 153.637 87.4050   1
   0   0 -21 13.0080 79.8088   6
   0   0 -21-84.7750 125.352  10
   0   0 -22 1016.90 236.935  10
   0   0  22 1325.58 222.642   1
   0   0 -22 1222.09 221.296   6
   0   0  22 1389.74 275.485   2
   0   0  23 42.7448 99.2886   2
   0   0 -23 5.54574 93.9185  10
   0   0 -23 93.2270 101.530   6
   0   0  23 89.0976 89.1645   1
   0   0 -24 1082.79 214.979   6
   0   0 -24 400.409 167.459  10
   0   0  24 630.720 209.811   2
   0   0  24 674.545 178.791   1
   0   0 -25 75.8856 118.824  10
   0   1 -25 402.151 161.194  10
   0   1 -24 713.961 187.697   6
   0  -1  24 996.458 267.932   2
   0   1 -24 668.871 213.283  10
   0  -1  24 643.790 167.101   1
   0  -1  23 1371.50 246.648   1
   0   1 -23 1600.52 248.100   6
   0   1 -23 1532.90 292.060  10
   0   1 -22 62.3196 101.872   6
   0  -1  22 128.568 110.565   1
   0   1 -22 146.663 114.222  10
   0   1 -21 1320.25 219.486   6
   0  -1  21 1109.38 209.224   1
   0   1 -21 1691.52 283.027  10
   0  -1  20 192.689 94.7565   1
   0   1 -20 131.458 92.4860  10
   0   1 -20-36.9304 86.0815   6
   0   1 -19 644.620 152.474   6
   0   1 -19 1017.90 211.568  10
   0  -1  19 939.876 175.298   1
   0  -1  18 577.818 131.837   1
   0   1 -18 710.874 154.320   6
   0   1 -18 1061.49 205.187  10
   0  -1  17 1126.98 183.494   1
   0   1 -17 1416.37 221.342  10
   0   1 -17 1296.90 193.976   6
   0  -1  16 418.402 108.098   1
   0   1 -16 476.971 125.496   6
   0   1 -16 717.979 160.038  10
   0  -1  15 1221.05 172.193   1
   0   1 -15 1326.59 185.623   6
   0   1 -15 1058.93 172.464  10
   0  -1  14 410.199 73.4490   7
   0   1 -14 632.283 124.970   6
   0  -1  14 483.914 114.517   1
   0   1 -14 446.586 116.182  10
   0   1 -13 3045.48 258.578   6
   0  -1  13 3478.46 264.668   1
   0   1 -13 2507.35 122.416   4
   0   1 -13 3366.29 292.991  10
   0  -1  13 3043.97 186.872   7
   0   1 -12 8681.78 423.935   6
   0   1 -12 7263.55 234.821   4
   0  -1  12 8122.12 402.021   1
   0   1 -12 7726.93 427.248  10
   0  -1  12 6958.30 292.962   7
   0   1 -11 12278.6 500.383   6
   0  -1  11 10831.3 365.570   7
   0  -1  11 11225.5 467.802   1
   0   1 -11 12005.3 528.900  10
   0   1 -11 10772.4 309.414   4
   0  -1  10 10205.2 417.422   1
   0   1 -10 8887.48 268.909   4
   0   1 -10 9513.11 425.203   6
   0   1 -10 9451.25 442.974  10
   0  -1  10 9359.92 316.246   7
   0   1  -9 370.945 87.5317   6
   0  -1   9 440.973 62.1617   7
   0   1  -9 321.134 93.9452  10
   0  -1   9 359.898 77.8017   1
   0   1  -9 386.167 46.1972   4
   0   1  -8 607.078 104.659  10
   0  -1   8 428.613 86.7059  10
   0   1  -8 564.135 80.9475   1
   0  -1   8 528.854 90.5843   1
   0  -1   8 617.025 64.1826   7
   0  -1   8 628.406 122.545   9
   0   1  -8 503.673 48.8202   4
   0   1  -7 3984.59 209.052   1
   0  -1   7 4173.44 264.245   9
   0  -1   7 3988.83 225.760  10
   0   1  -7 4026.05 233.866  10
   0  -1   7 3883.48 210.572   1
   0  -1   7 3909.02 152.897   7
   0   1  -7 3392.38 130.770   4
   0   1  -6 3200.41 171.743   1
   0  -1   6 3109.91 123.146   7
   0  -1   6 2885.66 167.787   1
   0   1  -6 2764.02 108.573   4
   0  -1   6 2842.86 208.375   9
   0  -1   6 3255.84 192.497  10
   0   1  -6 2884.90 184.289  10
   0   1  -5 8735.80 284.672   1
   0   1  -5 7859.91 301.687  10
   0  -1   5 8352.56 300.300  10
   0  -1   5 8166.36 341.191   9
   0  -1   5 8164.38 214.226   7
   0   1  -5 7661.61 208.448   4
   0  -1   5 7777.60 278.951   1
   0  -1   4 4864.42 135.290   7
   0   1  -4 4389.75 135.820   4
   0  -1   4 4632.62 186.724   1
   0   1  -4 4387.20 197.363  10
   0  -1   4 4706.78 200.116  10
   0   1  -4 5123.09 191.934   1
   0   1  -3 20.0256 29.0293  10
   0  -1   3 35.6439 25.9528  10
   0  -1   3 43.7989 25.6450   1
   0   1  -3 41.9886 17.0395   4
   0   1  -3-4.48155 21.3148   1
   0   1  -2 814.443 54.6727   1
   0   1   3 79.9704 35.2948   2
   0   1   3 166.450 34.1061   6
   0   1   3 184.558 42.8150   9
   0  -1  -3 201.722 32.3381   1
   0  -1  -3 199.274 47.2993   9
   0   1   3 209.918 40.2099  10
   0   1   3 142.723 30.2897   1
   0  -1  -3 212.827 44.3207   6
   0  -1  -3 231.263 44.5482  10
   0   1   4 1424.66 114.735   9
   0   1   4 1332.80 91.8867   1
   0  -1  -4 1391.37 88.5445   1
   0  -1  -4 1344.17 115.197   9
   0   1   4 1306.13 101.433   6
   0  -1  -4 1442.86 105.098  10
   0  -1  -4 1389.44 106.090   6
   0   1   4 1323.64 98.2823  10
   0  -1  -5 1955.64 118.168   1
   0   1   5 1917.57 122.216   1
   0  -1  -5 2045.73 141.424   6
   0  -1  -5 1567.78 148.656   9
   0   1   5 2234.13 146.751   6
   0   1   5 1958.59 152.565   9
   0  -1  -5 2139.25 139.955  10
   0   1   5 2048.42 134.372  10
   0  -1  -6 59.9328 36.2072   1
   0   1   6 95.5695 51.6300   6
   0   1   6 23.8738 40.6488  10
   0   1   6 132.710 62.4854   9
   0  -1  -6 38.1555 58.9853   9
   0   1   6 68.0426 35.5162   7
   0  -1  -6 106.685 49.1570  10
   0   1   6 128.847 52.1953   1
   0  -1  -6 102.997 51.0762   6
   0  -1  -7 6637.28 272.783   1
   0   1   7 7347.19 308.338  10
   0  -1  -7 6365.29 335.075   9
   0   1   7 7048.57 255.736   7
   0   1   7 6425.83 273.128   1
   0  -1  -7 6668.00 301.489  10
   0  -1  -7 6328.40 294.351   6
   0   1   7 6955.01 342.588   9
   0   1   8 6623.25 341.546   9
   0   1   8 5472.22 267.340   1
   0  -1  -8 5791.54 292.989   6
   0   1   8 6065.54 295.232  10
   0   1   8 5764.26 243.042   7
   0  -1  -8 6053.77 301.054  10
   0  -1  -8 5644.04 328.731   9
   0  -1  -8 5653.85 265.770   1
   0  -1  -9 438.099 110.466   9
   0   1   9 362.621 66.7649   7
   0  -1  -9 483.189 85.6028   1
   0  -1  -9 339.796 84.3143   6
   0   1   9 396.916 85.4747  10
   0  -1  -9 433.745 92.2320  10
   0   1   9 380.308 77.6931   1
   0  -1 -10 24020.0 821.028   9
   0  -1 -10 24079.8 743.392  10
   0   1  10 22459.9 621.566   7
   0   1  10 21507.7 674.227   1
   0  -1 -10 20760.6 699.431   6
   0  -1 -11 1443.07 176.819  10
   0   1  11 1118.42 114.527   7
   0  -1 -11 1392.08 164.377   6
   0   1  11 1120.75 139.226   1
   0  -1 -11 1037.91 175.453   9
   0   1  12 12232.4 506.534   1
   0  -1 -12 12932.7 629.292   9
   0  -1 -12 13837.9 576.143  10
   0  -1 -12 12674.0 540.204   6
   0  -1 -13 5664.92 373.900  10
   0  -1 -13 5175.94 342.966   6
   0  -1 -13 5541.60 420.857   9
   0   1  13 5595.94 336.073   1
   0  -1 -14 918.898 166.244  10
   0  -1 -14 804.127 169.610   9
   0   1  14 848.404 138.915   1
   0  -1 -14 873.986 149.213   6
   0   1  15-33.3344 54.6382   1
   0  -1 -15 80.0527 100.094   9
   0  -1 -15-18.4535 55.2240   6
   0  -1 -15-42.3240 87.1007  10
   0  -1 -16 163.137 75.7518   6
   0   1  16 245.556 102.829   1
   0  -1 -16 111.377 84.5591  10
   0   1  17 1909.54 228.684   1
   0  -1 -17 1578.32 240.382  10
   0  -1 -17 1747.26 220.836   6
   0  -1 -18 859.060 180.524  10
   0  -1 -18 1124.24 185.128   6
   0   1  18 1195.50 189.321   1
   0  -1 -19 716.465 183.676  10
   0   1  19 495.153 153.891   2
   0  -1 -19 931.414 173.445   6
   0   1  19 631.117 149.694   1
   0   1  20 1213.95 200.910   1
   0   1  20 938.267 225.353   2
   0  -1 -20 1287.72 235.752  10
   0  -1 -20 1004.63 184.681   6
   0   1  21-18.2750 96.5208   2
   0  -1 -21 119.854 84.2267   6
   0  -1 -21 18.6704 99.0606  10
   0   1  21 209.315 107.116   1
   0  -1 -22-91.8344 101.622   6
   0  -1 -22-32.5845 100.539  10
   0   1  22 188.434 157.139   2
   0   1  22-8.36874 109.311   1
   0   1  23 879.749 222.844   2
   0   1  23 754.072 177.868   1
   0  -1 -23 814.893 174.669   6
   0  -1 -23 977.093 229.696  10
   0  -1 -24 377.483 154.346   6
   0   1  24 320.391 137.007   1
   0   1  24 414.824 180.447   2
   0  -1 -24 310.322 174.891  10
   0  -1 -25 973.043 202.548   6
   0  -1 -25 926.942 243.975  10
   0  -1 -26-47.7945 144.319  10
   0   2 -25 317.175 163.233  10
   0   2 -24 13.7515 102.675  10
   0   2 -23 1525.27 250.856   6
   0   2 -23 1524.87 292.848  10
   0  -2  23 1804.66 281.684   1
   0   2 -22 871.098 225.268  10
   0   2 -22 1201.84 214.091   6
   0  -2  22 773.869 174.517   1
   0  -2  21-15.6563 86.3932   1
   0   2 -21 67.9797 75.6795   6
   0   2 -21 141.829 137.678  10
   0   2 -20 295.064 153.841  10
   0  -2  20 103.616 82.8716   1
   0   2 -20 173.442 109.352   6
   0   2 -19 1958.74 250.883   6
   0   2 -19 1500.35 251.179  10
   0  -2  19 1604.56 225.585   1
   0   2 -18 537.151 139.929   6
   0  -2  18 502.588 137.943   1
   0   2 -18 725.306 175.185  10
   0   2 -17 3671.00 360.204  10
   0   2 -17 3929.03 331.836   6
   0  -2  17 3011.96 293.450   1
   0   2 -16 94.5944 75.7280   6
   0   2 -16-40.5304 95.6051  10
   0   2 -16 0.70808 21.1693   4
   0  -2  16-68.2328 96.9833   1
   0  -2  15 767.665 147.049   1
   0   2 -15 765.745 153.158   6
   0   2 -15 608.034 69.4993   4
   0  -2  15 554.629 85.6399   7
   0   2 -15 409.723 124.027  10
   0   2 -14 1847.53 213.235   6
   0  -2  14 1891.61 143.740   7
   0   2 -14 1786.24 228.481  10
   0   2 -14 1740.12 119.407   4
   0  -2  14 1668.21 192.412   1
   0  -2  13 244.551 90.9779   1
   0   2 -13 227.829 48.5581   4
   0   2 -13 145.977 94.6012  10
   0   2 -13 150.079 78.2316   6
   0  -2  13 228.329 51.6553   7
   0   2 -12 6924.81 384.431   6
   0  -2  12 6597.23 266.087   7
   0   2 -12 6773.79 413.059  10
   0   2 -12 7112.89 254.020   4
   0  -2  12 7274.15 381.413   1
   0  -2  11 186.357 74.5979   1
   0  -2  11 169.272 40.6566   7
   0   2 -11 106.311 77.5728  10
   0   2 -11 206.632 40.9679   4
   0   2 -10 1509.73 177.846  10
   0  -2  10 1945.20 174.691   1
   0   2 -10 1436.78 99.5360   4
   0  -2  10 1440.24 101.843   7
   0  -2   9 713.946 111.206   1
   0   2  -9 728.738 67.7319   4
   0   2  -9 739.856 128.749  10
   0  -2   9 652.369 63.7233   7
   0  -2   8 4074.20 234.776   1
   0   2  -8 3440.45 238.534  10
   0  -2   8 3997.66 246.124  10
   0  -2   8 3459.45 268.137   9
   0   2  -8 3551.83 153.725   4
   0  -2   8 3634.27 146.844   7
   0  -2   7 9020.67 252.583   7
   0  -2   7 10763.5 458.598   9
   0   2  -7 9330.30 391.180  10
   0   2  -7 10295.8 368.090   1
   0   2  -7 9380.39 277.217   4
   0  -2   7 9829.10 362.860   1
   0  -2   6 6889.84 194.170   7
   0   2  -6 7219.78 228.727   4
   0   2  -6 7240.82 318.995  10
   0  -2   6 7432.10 294.163   1
   0   2  -6 8631.15 306.967   1
   0  -2   5 17666.0 488.842   1
   0   2  -5 17622.1 421.846   4
   0   2  -5 16807.5 514.891  10
   0   2  -5 18490.4 494.283   1
   0  -2   4 31106.7 732.365   3
   0  -2   4 32603.8 734.492   1
   0   2  -4 33221.4 736.632   1
   0   2  -4 32128.7 677.924   4
   0   2  -4 30402.1 756.372  10
   0  -2   3 15580.9 416.399   3
   0  -2   3 17681.5 425.653   1
   0   2  -3 16950.1 424.899   1
   0  -2   2 1051.88 75.1758   3
   0   2  -2 1164.14 74.4322   1
   0   2  -2 1008.17 70.2816   3
   0  -2   2 1176.89 73.9233   1
   0  -2   1 8764.74 217.763   1
   0  -2   1 7687.69 210.884   3
   0   2  -1 7808.92 228.765   6
   0   2  -1 8158.41 214.195   3
   0   2   0 7986.29 227.770   6
   0  -2   0 8435.74 232.761   2
   0  -2  -1 18742.9 433.335   6
   0   2   1 19949.9 442.663   2
   0  -2  -1 17253.6 430.693   2
   0   2   1 18848.3 436.136   6
   0   2   2 648.646 64.7822   9
   0  -2  -2 554.789 62.8140   2
   0   2   2 615.438 43.4309   1
   0  -2  -2 599.603 62.1597   9
   0   2   2 707.760 66.6267   2
   0  -2  -2 677.427 63.3241   6
   0  -2  -2 616.025 43.4084   1
   0   2   2 578.938 60.2017   6
   0  -2  -3-2.11859 31.4734   6
   0   2   3 10.5203 30.8517   6
   0   2   3 34.5166 28.5569   1
   0  -2  -3 19.5129 39.6188   9
   0  -2  -3 23.1047 22.1591   1
   0  -2  -3 16.9241 34.1660   2
   0   2   3 8.80417 35.2093   2
   0   2   3-19.3594 34.2500   9
   0   2   4 1205.53 88.1601   1
   0   2   4 1570.40 116.921   9
   0  -2  -4 1278.70 88.4255   1
   0  -2  -4 1169.37 111.032   9
   0   2   4 1222.93 117.045   2
   0   2   4 1416.22 103.489  10
   0   2   4 1396.81 115.705   6
   0  -2  -4 1272.45 109.051   2
   0  -2  -4 1291.35 107.820   6
   0   2   5 36594.4 811.104   1
   0  -2  -5 37914.1 812.335   1
   0   2   5 35829.2 874.115   6
   0   2   5 34578.8 884.641   2
   0  -2  -5 36980.7 851.722  10
   0   2   5 38702.1 896.351   9
   0   2   5 36295.9 842.143  10
   0  -2  -5 35908.4 868.962   6
   0  -2  -5 36629.2 899.331   9
   0   2   6 421.421 68.9865   1
   0   2   6 321.877 72.0315   6
   0   2   6 325.384 62.2340  10
   0   2   6 306.541 69.6806   9
   0  -2  -6 207.221 61.0615   9
   0  -2  -6 392.953 74.0279   6
   0   2   6 206.218 67.4547   2
   0  -2  -6 321.922 66.9225  10
   0  -2  -6 369.903 59.0305   1
   0   2   7 38056.0 1013.28   2
   0  -2  -7 35766.2 1001.98   9
   0  -2  -7 38844.3 970.422   6
   0   2   7 37867.5 1004.17   9
   0   2   7 42094.8 919.237   7
   0  -2  -7 37406.8 967.707  10
   0   2   7 38400.7 951.245  10
   0   2   7 39609.0 915.240   1
   0   2   7 42247.2 1005.59   6
   0  -2  -7 39167.3 910.518   1
   0  -2  -8 1771.29 164.436   6
   0   2   8 1689.37 170.120   9
   0   2   8 1631.74 140.666   1
   0   2   8 1775.95 165.381   6
   0   2   8 1606.18 175.635   2
   0  -2  -8 1658.86 135.676   1
   0   2   8 1513.74 140.605  10
   0  -2  -8 1397.75 171.696   9
   0  -2  -8 1395.01 146.125  10
   0   2   8 1694.25 129.785   7
   0   2   9 6148.82 357.824   2
   0   2   9 5656.53 320.230   6
   0  -2  -9 5280.07 304.749  10
   0  -2  -9 5564.30 347.531   9
   0   2   9 5550.18 276.255   1
   0  -2  -9 5859.00 317.637   6
   0   2   9 6062.20 306.825  10
   0   2   9 5539.81 263.000   7
   0  -2  -9 5546.06 272.438   1
   0   2  10 218.132 97.2449   2
   0  -2 -10 104.642 63.6447   6
   0  -2 -10 72.6737 68.0688   9
   0   2  10 43.4730 43.7830   7
   0  -2 -10 79.0600 63.5448  10
   0   2  10 125.555 68.7147   1
   0   2  11 1413.72 188.069   2
   0   2  11 1410.75 153.009   1
   0  -2 -11 1328.21 165.661  10
   0  -2 -11 1360.65 166.823   6
   0  -2 -11 1450.18 194.726   9
   0  -2 -12 5584.19 399.762   9
   0   2  12 5276.89 311.155   1
   0  -2 -12 5414.17 338.260   6
   0   2  12 5403.05 377.667   2
   0  -2 -12 5047.59 336.040  10
   0  -2 -13 212.160 97.7633   9
   0  -2 -13 63.0808 62.2510   6
   0   2  13 45.1158 70.6011   2
   0  -2 -13-40.2060 66.0118  10
   0   2  13 72.9560 63.2064   1
   0   2  14 6355.00 377.056   1
   0  -2 -14 6891.50 432.181  10
   0  -2 -14 7082.30 490.210   9
   0  -2 -14 6938.67 412.818   6
   0   2  14 6607.26 461.174   2
   0   2  15 303.066 94.7268   1
   0  -2 -15 186.939 92.7485  10
   0  -2 -15 205.292 92.5741   6
   0  -2 -15 102.480 99.2982   9
   0   2  15 193.085 108.143   2
   0  -2 -16 342.655 121.979  10
   0   2  16 346.151 150.186   2
   0  -2 -16 189.727 118.475   9
   0  -2 -16 336.666 110.187   6
   0   2  16 403.467 107.840   1
   0  -2 -17 43.3381 101.969  10
   0   2  17 24.0331 83.1982   2
   0  -2 -17-34.9574 99.8188   9
   0  -2 -17 121.373 91.5156   6
   0   2  17 43.4352 81.1480   1
   0   2  18 7574.80 563.856   2
   0  -2 -18 8132.12 609.382   9
   0  -2 -18 7648.34 533.087  10
   0  -2 -18 7940.50 490.874   6
   0   2  18 7311.08 462.605   1
   0   2  19 991.068 173.770   1
   0  -2 -19 1267.43 231.357  10
   0  -2 -19 1057.60 189.829   6
   0   2  19 1201.16 249.919   2
   0   2  20 3044.27 316.678   1
   0  -2 -20 3254.81 326.836   6
   0  -2 -20 3709.15 391.943  10
   0   2  20 3132.87 387.835   2
   0  -2 -21 712.341 188.116  10
   0   2  21 396.018 117.048   1
   0   2  21 695.993 200.580   2
   0  -2 -21 477.667 135.342   6
   0  -2 -22 2009.66 301.445  10
   0   2  22 1814.18 257.251   1
   0   2  22 1893.43 315.512   2
   0  -2 -22 1628.74 241.992   6
   0  -2 -23 496.151 152.929   6
   0   2  23 410.656 139.988   1
   0   2  23 383.060 164.075   2
   0  -2 -23 366.557 169.037  10
   0  -2 -24 172.506 120.217  10
   0  -2 -24 210.851 129.757   6
   0   2  24-3.69575 123.986   2
   0   2  24-27.2046 101.064   1
   0  -2 -25 788.259 230.470  10
   0  -2 -25 719.487 182.132   6
   0  -2 -26 168.720 143.924  10
   0  -2 -26 108.438 123.190   6
   0   3 -24 30.7126 97.5650  10
   0   3 -23 47.7177 125.688  10
   0  -3  23-11.6898 98.2828   1
   0   3 -22 408.431 134.149   6
   0   3 -22 610.269 191.169  10
   0  -3  22 236.729 116.319   1
   0   3 -21 59.6338 126.465  10
   0  -3  21-83.4292 106.140   1
   0   3 -21-129.160 105.123   6
   0   3 -20 272.555 120.903   6
   0   3 -20 82.7805 89.4177  10
   0  -3  20 147.072 87.0146   1
   0   3 -19 105.529 99.1064   6
   0   3 -19 10.1410 94.0991  10
   0  -3  19-39.8419 90.1558   1
   0   3 -18 2785.40 331.985  10
   0  -3  18 2464.39 271.925   1
   0   3 -18 2982.89 298.832   6
   0  -3  17 548.501 128.554   1
   0   3 -17 647.134 160.796  10
   0   3 -17 870.140 167.465   6
   0   3 -16 1917.07 141.934   4
   0   3 -16 1933.58 232.955   6
   0   3 -16 1749.30 247.904  10
   0  -3  16 1979.45 231.616   1
   0  -3  15 2976.80 270.171   1
   0   3 -15 2959.47 306.785  10
   0   3 -15 3197.86 287.830   6
   0   3 -15 2878.54 176.937   4
   0  -3  14-26.3626 37.2306   7
   0   3 -14-40.6142 83.2133   6
   0   3 -14 40.7681 69.1116  10
   0   3 -14 7.68108 30.2849   4
   0  -3  14 48.2159 73.0224   1
   0  -3  13 1762.89 127.922   7
   0   3 -13 2389.78 250.964  10
   0   3 -13 2164.92 143.908   4
   0  -3  13 1897.70 201.411   1
   0   3 -12 267.090 113.162  10
   0  -3  12 155.224 57.5576   1
   0   3 -12 154.101 46.4214   4
   0  -3  12 110.769 36.5972   7
   0   3 -11 56.4090 33.5227   4
   0  -3  11 92.4982 34.2493   7
   0  -3  11 161.073 71.3080   1
   0   3 -11 89.9982 74.9372  10
   0  -3  10 149.855 58.7803   1
   0  -3  10 107.522 30.1700   7
   0   3 -10 219.987 89.8592  10
   0   3 -10 121.640 40.1398   4
   0   3  -9 256.482 51.0203   4
   0   3  -9 268.751 90.0312  10
   0  -3   9 211.701 38.0433   7
   0  -3   9 319.122 84.9022   1
   0   3  -8 8.91776 33.3669   4
   0  -3   8-11.5996 55.7037   1
   0  -3   8 40.4643 51.4368   3
   0   3  -8 65.4002 71.0919  10
   0  -3   8 27.2117 20.2283   7
   0  -3   7 486.466 45.1057   7
   0   3  -7 609.313 113.283  10
   0  -3   7 794.174 101.959   1
   0   3  -7 756.574 99.3785   1
   0   3  -7 809.973 78.5497   4
   0  -3   7 894.921 110.741   3
   0   3  -6 10787.6 382.062   1
   0  -3   6 10411.1 382.528   3
   0  -3   6 11260.9 388.402   1
   0   3  -6 10870.9 421.215  10
   0   3  -6 11329.0 331.169   4
   0   3  -5 7221.80 283.583   1
   0  -3   5 7434.76 283.461   1
   0  -3   5 7308.52 285.915   3
   0   3  -5 7017.90 243.900   4
   0   3  -5 7120.46 313.373  10
   0   3  -4 6616.93 251.149   1
   0  -3   4 5959.63 243.603   3
   0  -3   4 6454.07 245.319   1
   0  -3   3 10311.5 311.551   1
   0   3  -3 10639.8 316.762   1
   0  -3   3 10193.8 312.832   3
   0   3  -3 9973.80 306.771   3
   0   3  -2-1.25789 30.2732   6
   0   3  -2 23.8313 29.9908   3
   0  -3   2 59.6858 37.9232   3
   0  -3   2-24.1707 35.0595   1
   0   3  -2 29.2654 25.9608   1
   0   3  -1 1418.29 88.3657   3
   0  -3   1 1486.08 99.3911   6
   0  -3   1 1252.24 84.0377   3
   0  -3   1 1449.58 80.7386   1
   0   3  -1 1544.90 98.4639   6
   0  -3   0 4796.19 184.698   6
   0   3   0 4635.66 165.833   3
   0   3   0 4406.81 184.148   6
   0   3   0 4624.19 187.824   2
   0  -3   0 4500.78 183.442   2
   0  -3   0 4653.39 166.791   3
   0  -3  -1 397.192 56.9442   6
   0   3   1 416.878 35.6156   8
   0  -3  -1 447.627 34.9801   8
   0  -3  -1 419.929 59.4990   2
   0   3   1 363.632 55.1894   6
   0   3   1 323.065 58.8694   2
   0   3   2 162.203 50.0676   2
   0   3   2 133.860 24.5115   8
   0  -3  -2 246.673 58.0188   9
   0   3   2 175.506 43.4968   6
   0  -3  -2 193.263 30.6114   1
   0  -3  -2 184.862 48.3998   2
   0  -3  -2 159.887 47.2236   6
   0   3   3 417.410 46.0756   1
   0  -3  -3 408.303 78.1707   9
   0   3   3 492.893 68.0710   6
   0  -3  -3 492.287 47.1871   1
   0  -3  -3 474.763 74.9849   2
   0   3   3 518.992 70.9329   9
   0   3   3 394.465 68.6759   2
   0  -3  -3 476.187 73.9997   6
   0   3   4 624.086 88.8598   2
   0   3   4 671.052 87.0716   6
   0   3   4 669.716 91.7868   9
   0  -3  -4 764.214 92.2792   6
   0  -3  -4 573.259 81.2968   9
   0   3   4 748.748 69.3461   1
   0  -3  -4 655.018 60.4634   1
   0  -3  -4 651.884 86.8069   2
   0   3   5 11219.5 380.092   6
   0   3   5 9943.92 308.474   1
   0   3   5 10016.8 338.615  10
   0  -3  -5 9932.13 374.690   9
   0   3   5 10364.7 383.206   2
   0  -3  -5 9894.89 303.539   1
   0  -3  -5 10039.5 373.370   2
   0   3   5 10564.9 382.867   9
   0  -3  -5 9977.14 366.364   6
   0   3   6 26783.8 744.841   2
   0   3   6 24546.4 670.651  10
   0   3   6 25080.3 636.151   1
   0  -3  -6 27110.8 743.148   2
   0   3   6 25974.8 719.119   6
   0  -3  -6 24116.6 729.045   9
   0  -3  -6 27023.4 639.747   1
   0   3   6 27246.8 738.593   9
   0  -3  -6 26057.4 715.808   6
   0  -3  -7 4173.91 263.862   9
   0   3   7 4394.30 215.207   1
   0   3   7 4296.94 256.643   6
   0  -3  -7 4032.81 244.505   6
   0   3   7 4594.38 266.351   9
   0   3   7 4167.61 266.768   2
   0  -3  -7 4503.02 211.362   1
   0   3   7 4544.76 234.175  10
   0   3   8 16090.2 505.681   1
   0  -3  -8 17078.0 575.075   6
   0  -3  -8 17253.0 566.557  10
   0   3   8 17490.9 600.169   9
   0   3   8 16999.6 587.480   6
   0  -3  -8 17724.6 515.290   1
   0   3   8 16345.9 538.302  10
   0  -3  -8 16259.7 612.566   9
   0   3   8 17687.1 528.731   7
   0   3   8 17509.7 619.088   2
   0   3   9-22.9240 44.4564  10
   0  -3  -9 7.55386 51.0610  10
   0   3   9 77.7820 72.3736   2
   0  -3  -9-2.87621 39.1580   1
   0  -3  -9-13.1775 57.3291   6
   0   3   9 51.3291 44.3918   7
   0  -3  -9 0.05206 83.4390   9
   0   3   9-0.28324 42.0884   1
   0   3  10 431.587 88.8541  10
   0  -3 -10 298.181 77.9953   6
   0  -3 -10 469.254 119.013   9
   0   3  10 358.551 102.240   2
   0  -3 -10 428.656 102.140  10
   0   3  10 415.514 84.8302   1
   0  -3 -11 7134.20 436.966   9
   0   3  11 7432.92 353.780   1
   0  -3 -11 7618.84 399.751   6
   0  -3 -11 7689.38 399.259  10
   0   3  11 7481.75 434.306   2
   0   3  12-5.87781 70.9906   2
   0  -3 -12 11.1458 74.7217   9
   0  -3 -12 160.019 90.3112   6
   0   3  12 80.1444 52.9715   1
   0  -3 -12 9.34702 62.3389  10
   0   3  13 530.915 131.296   2
   0  -3 -13 504.775 113.406   6
   0  -3 -13 414.527 113.369  10
   0  -3 -13 497.923 143.366   9
   0   3  13 566.731 106.726   1
   0  -3 -14 1397.00 220.204   9
   0  -3 -14 1319.35 191.256  10
   0   3  14 1433.57 219.497   2
   0  -3 -14 1341.40 186.773   6
   0   3  14 1424.92 176.583   1
   0  -3 -15-55.2548 104.882   9
   0   3  15-57.4495 88.3181   2
   0  -3 -15-54.9484 67.2569   6
   0   3  15-36.9197 54.4881   1
   0  -3 -15-68.4092 88.2963  10
   0   3  16 376.108 106.721   1
   0  -3 -16 271.065 118.921  10
   0  -3 -16 211.890 115.845   9
   0  -3 -16 319.182 117.898   6
   0   3  16 362.250 141.597   2
   0  -3 -17 5928.38 448.119  10
   0  -3 -17 6187.19 512.952   9
   0  -3 -17 5684.56 409.502   6
   0   3  17 6620.45 506.918   2
   0   3  17 5867.87 403.003   1
   0  -3 -18 625.195 162.006  10
   0  -3 -18 495.463 172.740   9
   0  -3 -18 711.990 165.517   6
   0   3  18 509.014 137.249   1
   0   3  18 677.517 196.671   2
   0   3  19 8386.10 608.685   2
   0  -3 -19 7877.42 507.127   6
   0   3  19 8181.85 505.337   1
   0  -3 -19 7796.40 612.562   9
   0  -3 -19 6477.20 498.760  10
   0  -3 -20 469.151 138.329   6
   0  -3 -20 585.354 186.686  10
   0   3  20 354.967 142.880   2
   0  -3 -20 238.682 153.962   9
   0   3  20 78.6608 77.2896   1
   0  -3 -21 1476.76 234.520   6
   0  -3 -21 1569.60 266.225  10
   0   3  21 1620.99 242.758   1
   0   3  21 1927.17 310.889   2
   0   3  22 343.665 131.490   1
   0  -3 -22 233.525 113.462   6
   0  -3 -22 83.5642 113.057  10
   0   3  22 402.032 181.908   2
   0  -3 -23-53.3871 105.143  10
   0  -3 -23 133.900 81.8815   6
   0   3  23 33.0530 84.9225   1
   0   3  24 299.602 149.473   1
   0  -3 -24 273.177 123.933  10
   0   3  24 271.755 152.063   2
   0  -3 -24 38.6895 81.4449   6
   0  -3 -25 181.314 111.152  10
   0  -3 -25 118.118 102.098   6
   0   3  25 123.993 98.7104   1
   0  -3 -26 249.072 135.054   6
   0  -4  23 36.2481 100.381   1
   0   4 -23-94.0754 123.611  10
   0   4 -22 203.457 123.424   6
   0  -4  22-2.98272 71.6414   1
   0   4 -22 52.9164 96.5360  10
   0   4 -21 2.87535 78.6881   6
   0  -4  21-129.221 99.0352   1
   0   4 -21-128.419 130.331  10
   0   4 -20 298.769 121.096   6
   0  -4  20 218.110 105.691   1
   0   4 -20 182.265 122.962  10
   0   4 -19 842.629 216.771  10
   0  -4  19 220.776 99.9019   1
   0   4 -19 487.058 139.058   6
   0   4 -18-183.181 134.998  10
   0   4 -18 169.810 105.942   6
   0  -4  18-79.9955 93.3394   1
   0   4 -17 357.097 131.837  10
   0  -4  17 228.667 100.547   1
   0   4 -17 295.212 113.238   6
   0   4 -16 377.831 72.1206   4
   0   4 -16 383.449 135.305  10
   0   4 -16 229.762 78.5123   6
   0  -4  16 227.991 85.2228   1
   0  -4  15 665.353 131.655   1
   0   4 -15 716.603 94.1550   4
   0   4 -15 690.684 165.022  10
   0   4 -14 218.057 84.7674  10
   0  -4  14 298.730 93.6981   1
   0  -4  14 282.707 48.0636   7
   0   4 -14 409.309 74.7118   4
   0   4 -13 25.8491 46.1465   4
   0  -4  13-24.8327 27.8731   7
   0  -4  13-12.9756 67.4243   1
   0   4 -13 1.94688 75.5587  10
   0   4 -12 779.676 91.5327   4
   0  -4  12 931.351 142.963   1
   0  -4  12 678.993 64.4696   7
   0   4 -12 767.105 146.955  10
   0   4 -11 3609.31 197.567   4
   0  -4  11 2880.52 130.589   7
   0   4 -11 3574.04 292.125  10
   0  -4  11 2979.44 129.956   5
   0  -4  11 4152.81 278.742   1
   0   4 -10 587.517 79.9849   4
   0  -4  10 661.296 113.151   1
   0  -4  10 493.633 45.8441   5
   0  -4  10 491.352 47.1893   7
   0   4 -10 588.936 132.186  10
   0   4  -9 22.4113 64.7979  10
   0   4  -9-29.3885 36.3920   4
   0  -4   9 4.84198 46.2990   1
   0   4  -8 1110.00 151.320  10
   0  -4   8 1202.37 135.272   1
   0   4  -8 1244.93 110.968   4
   0   4  -7 6515.68 262.002   4
   0  -4   7 6608.80 306.055   1
   0  -4   7 6495.46 308.373   3
   0   4  -7 6475.26 340.565  10
   0   4  -6 17405.5 487.815   4
   0   4  -6 17833.3 541.969   1
   0   4  -6 17756.7 584.320  10
   0  -4   6 17537.2 537.925   3
   0  -4   6 17452.9 536.017   1
   0  -4   5 31111.6 759.345   3
   0   4  -5 29139.3 713.328   4
   0  -4   5 30240.4 752.273   1
   0   4  -5 28832.4 750.993   1
   0  -4   4 13652.5 409.315   1
   0   4  -4 12573.4 395.946   3
   0  -4   4 12130.9 395.272   3
   0   4  -4 13805.0 410.688   1
   0   4  -3 4124.80 188.074   3
   0   4  -3 3666.25 125.260   5
   0   4  -3 4205.02 196.656   6
   0  -4   3 3961.45 183.610   3
   0  -4   3 4411.37 190.079   1
   0   4  -3 4248.84 188.615   1
   0   4  -2 952.362 83.9623   3
   0  -4   2 897.649 80.8918   3
   0   4  -2 1046.87 96.3297   6
   0  -4   2 1033.35 85.7536   1
   0  -4   1 408.137 55.6184   3
   0   4  -1 329.327 54.1478   3
   0  -4   1 272.987 54.9894   2
   0   4  -1 496.699 70.7305   6
   0  -4   1 337.816 58.7894   6
   0  -4   1 427.411 53.8557   1
   0  -4   0 17042.5 385.810   8
   0  -4   0 16745.2 438.179   3
   0  -4   0 17049.0 471.259   6
   0   4   0 17313.6 474.358   6
   0  -4   0 18355.5 483.977   2
   0   4   0 16998.1 481.313   2
   0   4   0 17076.4 442.453   3
   0   4   1 1439.45 120.543   2
   0  -4  -1 1042.54 102.750   6
   0  -4  -1 1301.84 67.6783   8
   0  -4  -1 1274.68 115.165   2
   0   4   1 1225.23 108.511   6
   0   4   1 1000.48 85.8212   3
   0   4   1 1136.37 67.2722   8
   0  -4  -2 1060.32 106.689   2
   0   4   2 1226.30 117.234   2
   0   4   2 1056.11 102.360   6
   0  -4  -2 1311.10 119.286   6
   0  -4  -2 1182.46 63.2227   8
   0   4   2 1229.94 69.1711   8
   0   4   3 3781.34 205.342   2
   0   4   3 4348.21 215.302   6
   0  -4  -3 4371.42 223.283   2
   0  -4  -3 3495.43 198.948   6
   0   4   3 3963.99 142.967   8
   0  -4  -3 4025.04 143.825   1
   0  -4  -3 4032.53 213.100   9
   0  -4  -4 74.1965 28.6576   1
   0  -4  -4 60.1500 47.4132   2
   0  -4  -4 102.100 61.1066   9
   0   4   4 26.8685 38.8740   6
   0   4   4 90.5561 46.4968   9
   0   4   4 101.113 33.9360   1
   0   4   4 93.6617 53.3413   2
   0  -4  -4 90.3475 48.1827   6
   0  -4  -5 828.563 107.311   2
   0  -4  -5 872.231 106.620   6
   0  -4  -5 1046.10 82.9208   1
   0   4   5 943.194 113.350   6
   0   4   5 882.028 110.405   9
   0   4   5 951.129 127.977   2
   0   4   5 919.501 80.8022   1
   0  -4  -5 893.262 117.750   9
   0  -4  -6 10869.0 424.638   9
   0   4   6 11423.7 423.081   6
   0   4   6 10570.1 416.591   9
   0  -4  -6 10377.6 332.304   1
   0   4   6 10007.7 416.520   2
   0  -4  -6 10093.4 402.775   6
   0  -4  -6 10662.7 428.738   2
   0   4   6 10027.5 367.817  10
   0   4   6 10301.9 334.530   1
   0   4   7 17000.7 577.940   6
   0   4   7 16617.2 576.696   9
   0  -4  -7 17109.3 592.079   2
   0  -4  -7 16534.0 564.597   6
   0   4   7 15961.2 481.214   1
   0  -4  -7 16741.1 590.163   9
   0   4   7 16558.2 585.984   2
   0  -4  -7 17676.5 486.280   1
   0   4   7 16265.9 523.002  10
   0   4   8 1704.35 187.707   2
   0  -4  -8 1635.26 190.716   9
   0  -4  -8 2031.52 145.152   1
   0   4   8 1765.48 143.854   1
   0  -4  -8 1795.90 174.612   6
   0   4   8 1683.94 150.588  10
   0  -4  -9 4324.09 287.419   6
   0   4   9 4813.18 269.896  10
   0   4   9 4249.84 302.454   2
   0   4   9 4167.54 240.911   1
   0  -4  -9 4701.33 241.179   1
   0  -4  -9 4712.90 324.407   9
   0  -4 -10 2180.34 211.647   6
   0   4  10 2043.09 172.546   1
   0   4  10 2151.75 188.560  10
   0   4  10 2163.06 229.683   2
   0  -4 -10 2172.44 228.570   9
   0  -4 -11 776.347 131.707   6
   0   4  11 831.804 149.478   2
   0  -4 -11 722.486 149.098   9
   0   4  11 653.249 107.954   1
   0  -4 -12-75.4683 77.5775   6
   0   4  12 50.8948 78.6932   2
   0   4  12-22.4723 53.4312   1
   0  -4 -12-58.5475 90.5811   9
   0   4  12 3.92726 12.5787   4
   0  -4 -13 1139.81 165.737  10
   0   4  13 968.260 169.834   2
   0   4  13 850.475 50.0979   4
   0  -4 -13 1026.49 160.912   6
   0   4  13 765.082 57.2153   4
   0   4  13 1140.58 147.968   1
   0  -4 -13 696.873 161.708   9
   0   4  14 2811.33 245.362   1
   0  -4 -14 2871.40 271.020  10
   0  -4 -14 2508.80 292.706   9
   0   4  14 3237.21 320.396   2
   0  -4 -14 2751.72 264.856   6
   0   4  15-30.1478 70.9493   1
   0  -4 -15 3.21946 66.6463   6
   0  -4 -15 15.8528 75.8603  10
   0   4  15-39.3445 76.5553   2
   0  -4 -15-170.248 108.365   9
   0  -4 -16 477.927 127.426   6
   0   4  16 433.243 138.895   2
   0  -4 -16 272.528 118.916   9
   0  -4 -16 634.280 146.955  10
   0   4  16 369.142 101.329   1
   0   4  17 1817.96 225.522   1
   0  -4 -17 2144.96 312.876   9
   0  -4 -17 2292.64 266.598   6
   0  -4 -17 2335.12 275.913  10
   0   4  17 2150.24 298.762   2
   0   4  18 6740.67 442.029   1
   0  -4 -18 7341.06 576.733   9
   0  -4 -18 6208.40 449.216   6
   0   4  18 7582.74 560.977   2
   0  -4 -18 6976.57 487.834  10
   0   4  19 3719.05 412.032   2
   0  -4 -19 3318.84 345.561  10
   0  -4 -19 3037.84 318.969   6
   0   4  19 3322.60 327.754   1
   0  -4 -19 3972.42 441.854   9
   0  -4 -20 983.507 194.740  10
   0  -4 -20 1165.12 216.981   6
   0   4  20 1243.32 247.801   2
   0   4  20 1024.85 176.246   1
   0  -4 -20 1025.85 241.859   9
   0   4  21 108.674 81.7193   1
   0   4  21 531.602 176.696   2
   0  -4 -21 420.224 186.864   9
   0  -4 -21 379.651 129.789   6
   0   4  22 24.9328 102.277   2
   0   4  22-127.926 126.061   1
   0  -4 -22-27.0534 137.199   9
   0  -4 -22-113.208 90.3465   6
   0  -4 -23 6.57944 85.7933   6
   0   4  23 48.9158 120.077   2
   0   4  23 2.05049 108.373   1
   0   4  24-31.1551 91.4837   1
   0  -4 -24 15.6056 101.585   6
   0   4  24 92.5243 124.005   2
   0   4  25 651.506 184.921   1
   0  -4 -25 566.058 169.472   6
   0  -4 -26-9.01632 106.113   6
   0   5 -23-129.032 137.830  10
   0  -5  22 168.935 120.407   1
   0   5 -22 91.3809 104.017  10
   0   5 -21 75.0182 92.5196  10
   0   5 -21-166.011 94.4422   6
   0  -5  21-46.8919 78.3518   1
   0   5 -20 345.897 152.029  10
   0  -5  20 430.207 150.575   1
   0   5 -20 329.757 127.870   6
   0   5 -19 699.922 149.528   6
   0   5 -19 733.908 200.866  10
   0  -5  19 787.304 170.001   1
   0   5 -18-83.8139 86.4277   6
   0  -5  18-45.8876 79.8217   1
   0   5 -18-110.320 115.991  10
   0  -5  17 749.866 155.493   1
   0   5 -17 569.318 167.858  10
   0   5 -17 315.988 98.0454   6
   0   5 -16 119.616 87.3441  10
   0   5 -16 112.503 55.8510   4
   0  -5  16 38.7936 65.5301   1
   0   5 -15 144.722 92.2725  10
   0  -5  15 227.992 74.0333   1
   0   5 -15 196.144 64.4966   4
   0   5 -14 1875.34 160.599   4
   0   5 -14 2413.42 286.764  10
   0  -5  14 2040.33 225.139   1
   0   5 -13 2031.14 251.922  10
   0  -5  13 2052.19 215.915   1
   0   5 -13 1986.43 162.590   4
   0  -5  12 803.269 138.216   1
   0   5 -12 681.745 92.0491   4
   0   5 -12 833.177 161.084  10
   0  -5  11 2245.23 213.211   1
   0   5 -11 1955.64 234.797  10
   0   5 -11 2083.29 163.792   4
   0  -5  10-4.64358 53.4690   1
   0   5 -10 46.8228 38.9997   4
   0   5 -10-10.5390 68.0154  10
   0   5  -9 739.048 137.987  10
   0   5  -9 1139.18 118.256   4
   0  -5   9 1083.24 136.497   1
   0   5  -8 851.401 99.5977   4
   0  -5   8 687.578 107.209   1
   0   5  -8 794.327 142.872  10
   0   5  -7 12.4488 43.0406   4
   0  -5   7-4.49954 47.9388   3
   0  -5   7 21.8933 47.0085   1
   0  -5   6 26510.5 731.690   1
   0   5  -6 26760.9 737.142   1
   0   5  -6 25312.8 693.575   4
   0  -5   6 29116.9 753.665   3
   0   5  -5 242.099 64.3590   3
   0   5  -5 396.709 69.2527   1
   0  -5   5 253.123 59.7398   3
   0  -5   5 401.080 75.0616   1
   0   5  -4 28121.3 694.140   3
   0  -5   4 29506.0 700.907   1
   0   5  -4 28727.2 721.544   6
   0   5  -4 24192.1 556.848   5
   0   5  -4 27952.3 697.642   1
   0  -5   4 28904.3 706.305   3
   0   5  -3 1144.98 101.727   3
   0  -5   3 1216.58 104.241   1
   0   5  -3 1088.72 110.630   6
   0  -5   3 1028.01 100.376   3
   0  -5   2 3676.22 175.208   1
   0   5  -2 3622.60 178.743   3
   0  -5   2 3754.15 184.159   3
   0   5  -2 4011.27 207.507   6
   0  -5   1 13164.6 356.695   1
   0   5  -1 12540.8 378.924   3
   0  -5   1 12308.1 419.693   6
   0  -5   1 13488.9 428.400   2
   0   5  -1 12868.1 425.004   6
   0  -5   1 13016.8 383.974   3
   0   5   0 34.7716 44.1674   3
   0  -5   0-43.1524 41.0465   3
   0  -5   0 19.9925 43.9509   2
   0  -5   0 6.93083 22.9657   8
   0   5   0 47.0124 54.8292   2
   0  -5   0 82.7184 54.4259   6
   0   5   0 47.3328 38.5988   6
   0   5   1 19743.8 525.707   3
   0  -5  -1 18306.5 554.721   6
   0   5   1 19597.6 566.390   2
   0   5   1 20393.3 562.728   6
   0  -5  -1 19398.4 438.834   8
   0  -5  -1 20709.2 571.542   2
   0  -5  -2 15965.1 498.687   6
   0   5   2 15757.9 503.033   2
   0  -5  -2 16026.5 374.805   8
   0  -5  -2 17088.8 513.730   2
   0   5   2 15634.8 493.586   6
   0   5   2 16669.4 386.031   8
   0  -5  -3 319.573 43.6834   1
   0   5   3 458.502 84.0147   6
   0   5   3 396.195 81.7709   2
   0  -5  -3 355.622 75.4707   2
   0  -5  -3 300.075 76.3241   9
   0   5   3 335.760 43.8683   8
   0  -5  -3 312.275 70.7572   6
   0  -5  -4 597.438 96.6662   2
   0   5   4 607.874 58.5254   8
   0   5   4 504.346 94.9752   2
   0  -5  -4 501.896 55.0672   1
   0  -5  -4 511.165 88.8885   6
   0  -5  -4 632.849 104.928   9
   0   5   4 389.258 72.9718   6
   0   5   5 1738.53 112.084   1
   0  -5  -5 1810.31 164.795   6
   0   5   5 1583.41 155.628   9
   0  -5  -5 1904.70 113.654   1
   0  -5  -5 1950.40 171.193   2
   0  -5  -5 1782.01 168.515   9
   0   5   5 1844.39 165.454   6
   0   5   5 2037.45 116.763   8
   0   5   5 1847.67 167.943   2
   0  -5  -6 16.7794 31.7969   1
   0   5   6 80.8151 55.7584   6
   0   5   6 62.5391 55.7892   2
   0   5   6 40.0642 37.6084   1
   0   5   6-102.169 67.1041   9
   0  -5  -6 35.2598 44.8154   2
   0  -5  -6 49.8744 53.9076   6
   0  -5  -6 9.07444 58.1812   9
   0  -5  -7 10345.4 347.001   1
   0   5   7 10698.7 399.067  10
   0   5   7 9790.54 440.617   2
   0   5   7 10204.9 349.862   1
   0  -5  -7 10662.5 456.143   9
   0  -5  -7 10606.7 442.938   6
   0  -5  -8 726.159 92.0784   1
   0   5   8 758.419 94.2547   1
   0  -5  -8 564.174 107.567   6
   0   5   8 653.824 98.8231  10
   0   5   8 483.881 110.814   2
   0  -5  -8 778.394 136.769   9
   0   5   9 884.982 116.436  10
   0   5   9 968.277 152.164   2
   0  -5  -9 693.644 137.156   9
   0  -5  -9 830.559 133.853   6
   0   5   9 880.156 107.736   1
   0  -5  -9 954.422 108.503   1
   0  -5 -10 2314.46 218.311   6
   0   5  10 2088.30 227.759   2
   0  -5 -10 2454.87 249.910   9
   0   5  10 2187.93 179.709   1
   0  -5 -10 2484.88 179.350   1
   0   5  11 684.169 111.574   1
   0  -5 -11 649.606 122.213   6
   0   5  11 918.079 163.777   2
   0  -5 -11 512.337 133.213   9
   0   5  12 120.442 71.8032   2
   0  -5 -12 205.248 100.168   9
   0   5  12 200.720 68.1832   1
   0  -5 -12 201.317 80.2926   6
   0   5  13 5849.04 349.652   1
   0   5  13 6506.80 445.552   2
   0  -5 -13 6116.35 434.881   9
   0  -5 -13 5418.36 369.370   6
   0   5  13 5328.06 189.166   4
   0   5  14 129.119 69.6915   1
   0  -5 -14 110.807 68.4849   6
   0   5  14 147.860 91.6296   2
   0  -5 -14 151.535 99.6651   9
   0   5  14 157.245 29.8930   4
   0   5  15 2140.42 272.016   2
   0  -5 -15 1893.06 271.921   9
   0   5  15 2111.31 222.782   1
   0  -5 -15 1892.56 231.961   6
   0  -5 -16 850.245 159.300   6
   0   5  16 1213.71 225.518   2
   0   5  16 1138.52 171.980   1
   0  -5 -16 1333.34 241.309   9
   0  -5 -17-15.7327 90.1346   6
   0   5  17 100.024 86.4618   2
   0   5  17 236.003 100.822   1
   0  -5 -17 163.901 111.319   9
   0   5  18 3606.63 397.684   2
   0  -5 -18 3403.29 394.783   9
   0  -5 -18 2790.30 304.436   6
   0   5  18 2911.32 289.572   1
   0  -5 -19 62.4257 86.2308   6
   0  -5 -19-16.1758 104.543   9
   0   5  19-128.118 101.208   2
   0   5  19-33.6311 79.7857   1
   0   5  20 664.382 151.670   1
   0   5  20 633.649 196.090   2
   0  -5 -20 664.440 162.154   6
   0  -5 -20 624.827 205.059   9
   0   5  21 6.01026 79.4841   1
   0  -5 -21-123.837 108.579   9
   0   5  21 142.422 138.756   2
   0  -5 -21-57.9384 75.7496   6
   0   5  22 107.314 112.959   2
   0  -5 -22-70.5339 144.647   9
   0   5  22-10.1225 83.9667   1
   0  -5 -22-85.5180 103.092   6
   0   5  23 44.6265 110.675   2
   0  -5 -23 24.4366 113.695   9
   0   5  23-54.8269 94.8612   1
   0  -5 -23-110.601 92.3426   6
   0  -5 -24 1996.35 294.401   6
   0  -5 -24 2192.25 383.498   9
   0   5  24 1670.35 266.183   1
   0   5  25 412.167 159.119   1
   0  -5 -25 453.780 159.984   6
   0  -5 -26 1226.30 246.383   6
   0   6 -22 145.593 151.959  10
   0  -6  22 480.189 189.656   1
   0   6 -21 37.4340 105.820  10
   0  -6  21 46.6732 85.4627   1
   0   6 -20 1126.66 197.620   6
   0   6 -20 721.569 186.779  10
   0  -6  20 667.424 164.550   1
   0   6 -19 714.851 158.575   6
   0  -6  19 456.573 120.629   1
   0   6 -19 721.871 180.515  10
   0  -6  18 117.017 87.6474   1
   0   6 -18 134.869 135.349  10
   0  -6  17 378.674 128.870   1
   0   6 -17 302.840 134.712  10
   0  -6  16-89.3168 97.9236   1
   0   6 -16 97.8930 95.7991  10
   0   6 -16 64.0956 53.3627   4
   0   6 -15 409.079 146.024  10
   0  -6  15 100.604 67.2591   1
   0   6 -15 185.193 61.4696   4
   0  -6  14 810.450 143.219   1
   0   6 -14 767.466 111.353   4
   0   6 -14 850.315 174.924  10
   0  -6  13 5891.23 379.763   1
   0   6 -13 5556.02 415.325  10
   0   6 -13 5426.52 298.308   4
   0   6 -12 2046.57 178.317   4
   0   6 -12 2417.57 263.008  10
   0  -6  12 2208.62 222.284   1
   0   6 -11 794.406 160.355  10
   0  -6  11 780.723 134.090   1
   0   6 -11 640.180 100.288   4
   0  -6  10 1520.91 169.182   1
   0   6 -10 1401.77 149.427   4
   0   6 -10 1312.19 189.431  10
   0  -6   9 137.149 63.0567   1
   0   6  -9 41.9435 65.3432  10
   0   6  -9 255.547 65.1143   4
   0   6  -8 1.46326 68.4391  10
   0   6  -8 9.02205 42.2734   4
   0  -6   8-12.2392 45.7244   1
   0  -6   7 543.206 96.3336   1
   0   6  -7 586.279 121.609  10
   0   6  -7 536.443 87.6408   4
   0   6  -6 890.562 112.662   3
   0  -6   6 967.885 115.459   1
   0   6  -6 1037.35 119.861   4
   0  -6   6 1127.28 124.749   3
   0   6  -5 2376.79 170.465   1
   0  -6   5 2478.01 176.318   3
   0   6  -5 2208.57 165.166   3
   0  -6   5 2473.77 175.877   1
   0   6  -5 2014.90 93.6067   5
   0   6  -5 2371.50 177.755   6
   0   6  -4 691.922 96.9788   6
   0  -6   4 762.886 96.0417   3
   0   6  -4 630.357 88.2823   3
   0  -6   4 798.622 96.5927   1
   0   6  -4 750.403 63.3924   5
   0  -6   3 2687.74 164.170   1
   0  -6   3 2692.97 168.227   3
   0   6  -3 2705.47 168.611   3
   0   6  -3 2664.21 184.546   6
   0  -6   2 94.4759 41.4108   3
   0   6  -2 130.276 46.8146   3
   0   6  -2 179.913 54.0262   6
   0  -6   2 71.6050 34.9887   1
   0  -6   2 72.6282 50.3889   6
   0  -6   1 6750.01 309.979   6
   0   6  -1 6692.75 303.247   6
   0  -6   1 6866.66 306.720   2
   0  -6   1 6888.06 271.826   3
   0  -6   1 6596.63 240.647   1
   0   6  -1 6387.85 271.136   3
   0  -6   0 3048.35 197.783   2
   0  -6   0 2908.70 192.473   6
   0   6   0 3092.69 196.029   6
   0  -6   0 2918.28 127.972   8
   0   6   0 2935.98 174.237   3
   0  -6  -1 12636.2 445.275   2
   0   6   1 12136.3 447.343   2
   0  -6  -1 12694.8 321.889   8
   0  -6  -1 11303.8 429.651   6
   0   6   1 13107.8 448.131   6
   0   6   1 12408.7 406.969   3
   0  -6  -2 404.590 89.3764   2
   0   6   2 350.870 42.8378   8
   0  -6  -2 419.803 45.9072   8
   0   6   2 379.275 77.1309   6
   0  -6  -2 322.336 73.5282   6
   0   6   2 404.965 92.1563   2
   0   6   3 10583.6 411.564   6
   0  -6  -3 11540.1 429.129   2
   0   6   3 10060.8 409.766   2
   0  -6  -3 10579.4 417.851   6
   0  -6  -3 10438.9 292.951   1
   0  -6  -3 10199.1 282.456   8
   0   6   3 10445.4 292.700   8
   0  -6  -4 1146.51 81.6110   1
   0   6   4 1104.14 128.657   6
   0   6   4 1071.64 130.312   2
   0  -6  -4 1129.54 133.161   2
   0  -6  -4 1079.47 141.974   9
   0   6   4 1160.73 84.7527   8
   0  -6  -4 1283.81 143.760   6
   0   6   5-16.1680 54.8768   2
   0   6   5-17.9588 23.7592   8
   0  -6  -5-10.4858 29.9417   1
   0  -6  -5-2.92631 63.4735   6
   0  -6  -5 19.4263 46.1258   2
   0  -6  -5 2.67903 55.2256   9
   0   6   6 1906.08 123.495   8
   0   6   6 1822.25 122.465   1
   0  -6  -6 2066.32 126.057   1
   0  -6  -6 1708.13 181.597   9
   0   6   6 1749.11 185.794   2
   0  -6  -6 1699.72 177.339   6
   0   6   7 1090.96 153.292   2
   0  -6  -7 1188.45 156.044   6
   0  -6  -7 1229.99 106.140   1
   0  -6  -7 1174.93 155.231   9
   0   6   7 1167.66 107.497   1
   0   6   8 2055.33 209.433   2
   0   6   8 1750.16 144.787   1
   0  -6  -8 2203.91 215.670   9
   0  -6  -8 2062.69 148.258   1
   0   6   8 2006.96 174.073  10
   0  -6  -8 1911.42 195.688   6
   0   6   9 206.261 64.6487   1
   0  -6  -9 90.1759 64.6236   9
   0   6   9 149.911 87.1459   2
   0   6   9 143.249 50.3192  10
   0  -6  -9 261.853 98.4499   6
   0  -6  -9 222.683 56.0789   1
   0  -6 -10 30.5363 65.8161   9
   0  -6 -10 119.710 69.5755   6
   0   6  10 93.1938 71.7688   2
   0   6  10 45.7987 44.6823   1
   0  -6 -10 152.468 56.7683   1
   0  -6 -11-0.70018 64.9625   6
   0  -6 -11 8.61271 65.6487   9
   0   6  11 16.0155 42.1401   1
   0   6  11 6.62946 64.0624   2
   0  -6 -12 6083.96 391.648   6
   0   6  12 5669.57 407.032   2
   0  -6 -12 6518.00 439.657   9
   0   6  12 6176.17 337.546   1
   0  -6 -13 1049.97 189.099   9
   0   6  13 861.943 170.307   2
   0   6  13 904.111 136.388   1
   0  -6 -13 916.391 153.550   6
   0   6  13 819.165 78.6366   4
   0   6  14 8389.68 280.141   4
   0  -6 -14 9673.35 581.456   9
   0   6  14 9019.52 564.109   2
   0   6  14 9633.98 464.509   1
   0  -6 -14 9225.92 518.772   6
   0   6  15 2454.51 303.688   2
   0  -6 -15 2100.77 290.418   9
   0   6  15 2288.30 228.626   1
   0  -6 -15 2172.64 254.493   6
   0  -6 -16 130.790 91.5025   9
   0  -6 -16 201.983 88.4987   6
   0   6  16 370.852 139.120   2
   0   6  16 391.885 100.365   1
   0   6  17 1341.88 235.772   2
   0  -6 -17 1019.83 187.228   6
   0   6  17 1172.54 174.857   1
   0  -6 -17 804.588 199.153   9
   0   6  18 290.179 121.589   2
   0   6  18 348.821 104.563   1
   0  -6 -18 359.758 123.008   6
   0  -6 -18 74.1402 118.415   9
   0   6  19 1119.41 226.500   2
   0  -6 -19 1033.43 227.285   9
   0  -6 -19 1065.52 205.073   6
   0   6  19 1018.53 183.731   1
   0  -6 -20 445.347 149.246   6
   0  -6 -20 127.893 120.815   9
   0   6  20 321.033 154.581   2
   0   6  20 338.212 113.044   1
   0   6  21 285.376 146.394   2
   0   6  21 215.702 85.0022   1
   0  -6 -21 226.448 107.386   6
   0  -6 -21 350.322 172.987   9
   0  -6 -22-139.166 109.758   6
   0  -6 -22 14.1756 105.406   9
   0   6  22 129.351 108.320   1
   0   6  22 113.501 158.844   2
   0  -6 -23 143.384 113.294   6
   0   6  23 225.723 147.184   2
   0   6  23 147.422 93.8416   1
   0  -6 -23 370.985 186.498   9
   0  -6 -24 452.609 165.505   6
   0  -6 -24 787.577 255.354   9
   0   6  24 536.816 168.074   1
   0   6  25 2218.40 318.238   1
   0  -6 -25 1952.19 301.730   6
   0   7 -22 1159.21 266.756  10
   0  -7  21 147.999 102.873   1
   0   7 -21 252.652 128.050  10
   0   7 -20 532.423 175.287  10
   0  -7  20 498.793 150.898   1
   0  -7  19 733.070 170.234   1
   0   7 -19 883.452 222.494  10
   0  -7  18 33.8521 87.8427   1
   0   7 -18-173.498 144.058  10
   0  -7  17 805.350 170.601   1
   0   7 -17 678.559 177.267  10
   0   7 -16 15.8230 54.7069   4
   0   7 -16 19.8035 85.9215  10
   0  -7  16-125.697 103.565   1
   0   7 -15 219.660 107.229  10
   0   7 -15 348.563 91.7257   4
   0  -7  15 124.513 63.8846   1
   0   7 -14 1033.29 139.685   4
   0  -7  14 1174.91 180.754   1
   0   7 -14 1044.36 206.812  10
   0  -7  13 2129.47 229.006   1
   0   7 -13 1788.55 260.806  10
   0   7 -13 1746.89 177.021   4
   0  -7  12 2566.94 242.659   1
   0   7 -12 2349.65 272.158  10
   0   7 -12 2433.01 206.043   4
   0  -7  11 216.651 75.9187   1
   0   7 -11 158.363 81.9045  10
   0   7 -11 93.1898 48.3136   4
   0   7 -10 152.138 64.7318   4
   0   7 -10 240.606 104.753  10
   0  -7  10 238.717 86.7949   1
   0   7  -9 2838.02 215.462   4
   0   7  -9 2937.33 275.803  10
   0  -7   9 2377.72 214.237   1
   0   7  -8 55.1455 66.6454  10
   0  -7   8-28.4960 60.4839   1
   0   7  -8 50.2421 47.7638   4
   0  -7   7-39.8690 45.9502   1
   0   7  -7-51.0795 55.1589   6
   0   7  -7 20.9523 54.3030   4
   0  -7   6 8133.44 341.006   1
   0   7  -6 7911.78 355.618   6
   0   7  -6 6909.68 318.890   3
   0  -7   6 8104.26 346.902   3
   0   7  -6 7562.95 337.331   4
   0  -7   5 10441.0 388.337   1
   0   7  -5 9787.88 409.400   6
   0   7  -5 8468.14 263.910   5
   0  -7   5 10970.6 406.935   3
   0   7  -5 9671.28 386.853   3
   0  -7   4 213.217 61.8627   1
   0   7  -4 118.416 54.2755   6
   0   7  -4 197.571 64.2777   3
   0   7  -4 189.388 40.8982   5
   0  -7   4 199.443 58.2466   3
   0  -7   3 222.605 56.6103   1
   0   7  -3 342.519 81.0050   6
   0   7  -3 270.757 62.5713   3
   0  -7   3 298.536 66.9739   3
   0  -7   2 2120.05 178.704   6
   0  -7   2 1900.91 136.724   1
   0  -7   2 2152.89 159.870   3
   0   7  -2 2036.81 151.661   3
   0  -7   2 2202.59 181.641   2
   0   7  -2 2229.19 178.970   6
   0  -7   1 3498.28 174.928   1
   0   7  -1 3497.12 201.329   3
   0  -7   1 3770.70 208.132   3
   0   7  -1 3794.18 236.107   6
   0  -7   1 3981.41 241.205   2
   0  -7   1 3146.47 224.089   6
   0  -7   0 1385.40 149.312   6
   0  -7   0 1399.99 91.6338   8
   0   7   0 1685.52 156.077   6
   0   7   0 1349.90 124.067   3
   0  -7   0 1344.81 141.393   2
   0   7   1 5950.78 276.032   3
   0  -7  -1 5789.01 304.251   6
   0   7   1 6178.13 309.709   6
   0  -7  -1 6151.87 204.530   8
   0   7   1 6003.53 318.713   2
   0  -7  -1 6079.77 310.054   2
   0   7   2 9234.24 401.140   2
   0  -7  -2 9043.81 389.867   2
   0   7   2 8826.95 348.859   3
   0  -7  -2 8697.30 256.823   8
   0  -7  -2 7964.16 376.489   6
   0   7   2 8584.50 384.712   6
   0  -7  -3 18509.3 622.488   2
   0   7   3 18630.2 457.944   8
   0   7   3 17857.5 614.983   2
   0  -7  -3 18406.2 442.217   8
   0  -7  -3 17159.4 600.886   6
   0  -7  -4 962.729 131.694   6
   0   7   4 1018.37 138.109   2
   0  -7  -4 880.858 77.1100   1
   0   7   4 1012.98 80.4837   8
   0  -7  -4 1028.44 147.746   9
   0   7   5 79.7492 68.5023   2
   0   7   5 121.327 39.8854   8
   0  -7  -5 5.34399 28.4402   1
   0  -7  -5 67.6606 61.1317   9
   0  -7  -5 135.593 63.6913   6
   0   7   6 2434.60 221.073   2
   0  -7  -6 2573.40 145.133   1
   0  -7  -6 2688.34 233.588   9
   0  -7  -6 2468.20 217.158   6
   0   7   6 2446.77 144.375   8
   0  -7  -7 1255.02 105.132   1
   0   7   7 1207.65 107.171   8
   0  -7  -7 877.491 135.711   6
   0  -7  -7 945.955 143.959   9
   0   7   7 833.936 140.218   2
   0   7   8 2225.45 152.593   8
   0   7   8 2057.81 215.985   2
   0  -7  -8 1878.07 202.440   6
   0   7   8 2184.93 156.586   1
   0  -7  -8 2071.23 146.443   1
   0  -7  -8 2112.45 214.743   9
   0  -7  -9 547.100 80.7603   1
   0   7   9 320.588 65.1827   1
   0   7   9 368.943 107.089   2
   0  -7  -9 440.046 126.235   9
   0   7   9 451.518 96.4312  10
   0  -7  -9 389.440 101.050   6
   0  -7 -10-25.9677 59.6089   6
   0   7  10-23.2218 46.0714   1
   0  -7 -10-2.38530 83.2545   9
   0   7  10-11.7694 80.7684   2
   0  -7 -10 19.5523 33.1642   1
   0   7  11 97.9947 67.2247   2
   0  -7 -11-93.4464 81.6093   6
   0  -7 -11-70.8640 79.0367   9
   0   7  11 96.8328 54.4378   1
   0  -7 -12 3115.56 310.339   9
   0   7  12 3555.55 249.297   1
   0   7  12 3638.50 330.306   2
   0  -7 -12 3294.56 293.608   6
   0   7  13 2081.50 202.965   1
   0  -7 -13 1989.39 259.083   9
   0   7  13 2172.37 271.291   2
   0  -7 -13 2138.18 239.141   6
   0  -7 -14 6135.88 417.714   6
   0  -7 -14 6057.16 466.495   9
   0   7  14 6409.02 371.270   1
   0   7  14 5644.73 240.824   4
   0   7  14 6785.98 486.295   2
   0  -7 -15 4306.63 363.139   6
   0   7  15 4292.52 313.854   1
   0   7  15 3746.20 379.096   2
   0  -7 -15 4634.12 419.477   9
   0  -7 -16 1613.17 262.359   9
   0   7  16 2209.33 239.321   1
   0  -7 -16 1699.47 236.103   6
   0   7  16 1985.38 289.335   2
   0  -7 -17 210.116 95.5230   6
   0  -7 -17 23.3068 115.818   9
   0   7  17 110.977 60.7904   1
   0   7  17 143.406 86.9083   2
   0  -7 -18 49.8142 99.1867   9
   0  -7 -18 396.033 134.236   6
   0   7  18 168.688 96.1203   1
   0   7  18 103.693 92.6985   2
   0   7  19 1713.30 226.179   1
   0  -7 -19 1868.48 263.031   6
   0  -7 -19 1155.99 243.721   9
   0   7  19 1517.32 276.103   2
   0  -7 -20-2.91006 81.5510   6
   0   7  20 86.7264 116.230   2
   0  -7 -20-36.1703 126.759   9
   0   7  20-54.8003 81.9063   1
   0  -7 -21 1099.64 258.222   9
   0   7  21 1479.10 231.492   1
   0   7  21 1072.33 256.655   2
   0  -7 -21 995.512 206.666   6
   0  -7 -22-17.8036 128.993   9
   0  -7 -22 139.713 128.416   6
   0   7  22 186.780 133.793   2
   0   7  22 29.7642 82.2215   1
   0   7  23 80.9104 132.677   2
   0  -7 -23-161.142 157.585   9
   0  -7 -23 58.6767 79.1284   6
   0   7  23 197.285 118.816   1
   0   7  24 1525.19 253.558   1
   0  -7 -24 822.346 204.950   6
   0   7  25 2949.97 366.190   1
   0  -7 -25 2733.96 361.148   6
   0  -8  21 938.676 211.681   1
   0   8 -21 1389.12 287.397  10
   0   8 -20-186.276 130.190  10
   0  -8  20 191.420 114.774   1
   0   8 -19 257.235 131.732  10
   0  -8  19 307.547 116.077   1
   0   8 -18-30.5881 99.8869  10
   0  -8  18-145.251 113.481   1
   0  -8  17-105.921 106.921   1
   0   8 -17 100.869 126.563  10
   0   8 -16 1159.41 161.135   4
   0   8 -16 1256.67 240.753  10
   0  -8  16 1346.71 211.137   1
   0  -8  15 44.0037 74.2869   1
   0   8 -15-73.2732 126.210  10
   0   8 -15-61.8078 75.6128   4
   0   8 -14 39.3515 64.5159   4
   0  -8  14 19.3229 63.5555   1
   0   8 -14-75.8055 100.910  10
   0  -8  13-24.4090 59.0556   1
   0   8 -13-139.766 124.792  10
   0   8 -13-2.10755 59.8074   4
   0   8 -12 59.5691 53.7684   4
   0   8 -12-19.1979 83.8545  10
   0  -8  12-41.0832 70.0537   1
   0   8 -11-70.4222 87.2203  10
   0  -8  11-109.960 74.4612   1
   0   8 -11-59.1812 64.7989   4
   0  -8  10-3.98644 55.0765   1
   0   8 -10 11.4688 72.9076  10
   0   8 -10-1.52613 59.9346   4
   0   8  -9 967.285 133.947   4
   0   8  -9 1101.81 181.870  10
   0  -8   9 851.305 133.869   1
   0  -8   8 4299.40 283.923   1
   0   8  -8 5033.55 361.617  10
   0   8  -8 4456.65 287.049   4
   0  -8   7 180.258 55.6077   1
   0   8  -7 60.9387 14.6598   7
   0   8  -7 188.578 66.5435   3
   0   8  -7 83.8138 15.7606   7
   0   8  -7 171.601 75.9668   4
   0  -8   6 1633.26 161.056   1
   0   8  -6 1229.38 75.6911   7
   0   8  -6 1363.14 86.0688   5
   0   8  -6 1486.10 153.002   3
   0   8  -6 1698.44 171.669   4
   0  -8   5 9818.79 402.736   3
   0   8  -5 8198.89 260.153   7
   0   8  -5 9572.49 394.505   3
   0  -8   5 9618.82 381.840   1
   0   8  -5 8603.96 280.352   5
   0  -8   4 575.899 94.2289   3
   0   8  -4 427.191 77.0618   3
   0  -8   4 454.990 78.8987   1
   0   8  -4 452.463 62.6230   5
   0  -8   3 60.5450 41.9788   1
   0   8  -3 4.22652 53.1930   3
   0  -8   3-32.6232 45.2470   3
   0  -8   2 1267.49 151.788   6
   0  -8   2 1400.38 134.348   3
   0   8  -2 1092.79 119.185   3
   0  -8   2 1231.72 117.688   1
   0  -8   1 66.8644 43.3769   3
   0  -8   1-8.75730 63.8001   6
   0  -8   1 72.0199 36.1173   1
   0  -8   1 165.013 45.9197   8
   0   8  -1 75.5716 52.4704   3
   0  -8   0 237.326 45.9350   8
   0   8   0 125.527 54.6703   3
   0  -8   0 137.713 56.7371   6
   0  -8  -1 55.1643 58.7609   6
   0  -8  -1-6.89607 26.7881   8
   0   8   1-39.3235 48.8034   3
   0   8   1-33.3358 69.7899   2
   0  -8  -2 4055.34 275.973   6
   0   8   2 4760.13 262.414   3
   0  -8  -2 4731.88 180.534   8
   0   8   2 5076.61 308.362   2
   0   8   3 793.150 109.839   3
   0  -8  -3 879.120 69.4307   8
   0  -8  -3 705.882 114.512   6
   0   8   3 790.190 71.4679   8
   0   8   3 675.769 126.290   2
   0   8   4 7826.47 262.598   8
   0  -8  -4 6864.20 248.223   1
   0   8   4 7323.66 388.451   2
   0  -8  -4 7450.89 380.893   6
   0  -8  -4 7562.81 397.790   9
   0  -8  -5 158.062 76.7174   6
   0  -8  -5 104.076 73.4769   9
   0  -8  -5 144.023 35.2151   1
   0   8   5 89.9363 70.7907   2
   0   8   5 122.641 38.4159   8
   0   8   6 5149.33 223.439   8
   0  -8  -6 4717.11 316.306   6
   0   8   6 5078.54 328.130   2
   0  -8  -6 4790.44 209.287   1
   0  -8  -6 5210.64 338.514   9
   0  -8  -7 271.720 53.1014   1
   0  -8  -7 277.695 92.0426   6
   0   8   7 227.820 88.4886   2
   0   8   7 233.951 51.6596   8
   0  -8  -7 144.938 63.6087   9
   0  -8  -8 7772.60 446.428   9
   0  -8  -8 7257.70 422.970   6
   0   8   8 7768.77 435.403   2
   0   8   8 8054.95 315.294   8
   0  -8  -8 7560.29 298.769   1
   0  -8  -9 54.6708 77.1972   6
   0   8   9 153.949 67.6572   2
   0  -8  -9-28.1199 77.7232   9
   0   8   9 269.896 67.3817   1
   0  -8  -9 232.340 57.4176   1
   0  -8 -10 1358.18 203.936   9
   0   8  10 1102.47 181.866   2
   0  -8 -10 1141.35 171.686   6
   0   8  10 1399.03 145.375   1
   0  -8 -10 1423.34 133.259   1
   0   8  11 945.583 173.898   2
   0  -8 -11 744.358 158.817   9
   0   8  11 768.003 112.177   1
   0  -8 -11 927.534 150.558   6
   0   8  12 92.3933 85.3895   2
   0   8  12-8.51866 46.1121   1
   0  -8 -12-32.7244 80.1768   6
   0  -8 -12 75.7376 92.1861   9
   0   8  13 6779.27 473.550   2
   0  -8 -13 5774.25 414.577   6
   0   8  13 6760.16 364.865   1
   0  -8 -13 5750.68 445.159   9
   0   8  14 59.3390 37.9625   4
   0   8  14 35.6410 60.6009   1
   0   8  14 115.262 111.536   2
   0  -8 -14-59.9666 84.0353   6
   0  -8 -14 154.979 122.795   9
   0   8  15 6966.25 512.873   2
   0  -8 -15 5812.70 441.184   6
   0  -8 -15 6555.50 503.775   9
   0   8  15 7180.75 409.587   1
   0  -8 -16 72.2897 104.072   9
   0  -8 -16 346.251 145.872   6
   0   8  16 264.105 123.484   2
   0   8  16 156.714 77.9532   1
   0   8  17-32.8396 101.479   2
   0  -8 -17-48.6666 86.8038   6
   0  -8 -17-99.2336 137.461   9
   0   8  17 118.870 78.5255   1
   0  -8 -18 298.176 154.831   9
   0   8  18 266.283 102.729   1
   0  -8 -18 189.828 98.5550   6
   0   8  18 449.503 156.998   2
   0  -8 -19 692.618 200.405   9
   0   8  19 1246.73 200.612   1
   0  -8 -19 967.033 202.404   6
   0   8  19 892.271 234.269   2
   0  -8 -20 207.699 136.184   9
   0  -8 -20-19.9160 82.8555   6
   0   8  20 212.125 132.806   2
   0   8  20 78.3596 64.5679   1
   0  -8 -21 971.159 238.593   9
   0  -8 -21 1236.54 223.680   6
   0   8  21 1209.30 210.503   1
   0   8  21 1120.88 251.237   2
   0   8  22 5.51166 68.0618   1
   0   8  22 87.4367 119.605   2
   0  -8 -22-168.364 141.707   9
   0  -8 -22 224.435 120.635   6
   0  -8 -23 128.438 124.657   6
   0   8  23 283.353 125.517   1
   0  -8 -23 178.330 150.876   9
   0  -8 -24 1070.98 223.891   6
   0  -9  20 212.694 123.155   1
   0   9 -20 36.8038 121.624  10
   0   9 -19 822.268 221.682  10
   0  -9  19 824.370 182.917   1
   0   9 -18 164.682 129.418  10
   0  -9  18 148.326 90.8967   1
   0   9 -17 157.906 127.389  10
   0  -9  17 123.303 106.896   1
   0   9 -16 218.906 119.599  10
   0  -9  16 259.144 94.7890   1
   0   9 -16 273.471 99.0282   4
   0   9 -15 1686.05 202.028   4
   0   9 -15 1780.20 289.833  10
   0  -9  15 1581.35 228.096   1
   0   9 -14-80.2493 107.064  10
   0  -9  14-105.061 83.4762   1
   0   9 -14-89.7088 81.3164   4
   0   9 -13 173.128 88.9365  10
   0   9 -13 348.938 103.812   4
   0  -9  13 63.0357 69.1103   1
   0   9 -12-153.893 129.833  10
   0   9 -12-49.1347 73.2968   4
   0  -9  12 11.4655 66.6265   1
   0  -9  11 735.056 138.534   1
   0   9 -11 662.554 135.945   4
   0   9 -11 782.309 179.095  10
   0   9 -10 15.1623 51.9602   4
   0  -9  10-107.549 82.9797   1
   0   9 -10 93.4550 106.415  10
   0  -9   9-15.6079 55.0720   1
   0   9  -9-29.5910 53.7924   4
   0   9  -9 80.8451 85.7830  10
   0   9  -8 2621.29 230.101   4
   0  -9   8 2211.32 209.871   1
   0   9  -7 745.135 56.5198   7
   0   9  -7 1362.34 168.156   4
   0   9  -7 883.074 67.6268   7
   0   9  -7 1211.44 148.795   3
   0   9  -7 771.040 62.8856   5
   0  -9   7 983.557 134.001   1
   0   9  -6 1237.19 146.634   3
   0   9  -6 1135.08 87.4622   5
   0  -9   6 1245.56 138.752   1
   0   9  -6 983.125 75.4649   7
   0   9  -6 1238.78 158.105   4
   0   9  -5 944.692 89.7794   5
   0   9  -5 1160.56 135.469   3
   0  -9   5 948.776 122.669   1
   0   9  -5 798.567 77.5329   7
   0   9  -5 954.996 145.268   4
   0   9  -4 10318.4 330.890   7
   0   9  -4 8700.55 333.892   5
   0   9  -4 10678.9 423.076   3
   0  -9   4 10571.4 403.533   1
   0  -9   3 1321.76 130.285   1
   0  -9   3 1427.74 144.657   3
   0   9  -3 1208.91 131.783   3
   0  -9   2-25.8509 43.6249   3
   0  -9   2-20.3630 66.5826   6
   0  -9   2 6.86501 37.2137   1
   0   9  -2-16.6058 44.5117   3
   0  -9   1 25.2874 28.1534   8
   0  -9   1 143.333 51.2797   1
   0   9  -1-28.7326 50.2817   3
   0  -9   1 96.0436 52.6133   3
   0  -9   1-12.1737 59.4859   6
   0  -9   0 1506.36 105.320   8
   0  -9   0 1301.31 109.115   1
   0  -9   0 1175.36 152.855   6
   0   9   0 1454.18 150.053   3
   0   9   1 386.042 103.241   2
   0  -9  -1 364.777 94.1864   6
   0   9   1 543.713 100.100   3
   0  -9  -1 414.725 55.3560   8
   0  -9  -2 213.846 96.6543   6
   0   9   2 188.974 73.1783   2
   0  -9  -2 209.036 38.1711   8
   0   9   2 101.056 53.7514   3
   0  -9  -3 1836.13 196.812   6
   0   9   3 2084.10 214.684   2
   0   9   3 2184.14 191.580   3
   0  -9  -3 2166.12 118.139   8
   0  -9  -4 123.797 70.1313   9
   0  -9  -4 132.363 67.3364   6
   0   9   4 188.027 86.6284   2
   0  -9  -4 128.536 35.5261   1
   0   9   4 175.493 43.2589   8
   0   9   5 28.3230 30.2077   8
   0   9   5 55.0168 74.0111   2
   0  -9  -5 62.6708 64.0939   6
   0  -9  -5-89.1608 75.7452   9
   0  -9  -5 28.7202 23.1775   1
   0   9   6 2356.49 147.725   8
   0  -9  -6 2011.11 227.486   9
   0  -9  -6 2019.57 130.649   1
   0  -9  -6 2397.64 231.797   6
   0   9   6 2323.75 232.657   2
   0   9   7 4762.91 229.725   8
   0   9   7 4680.95 346.090   2
   0  -9  -7 4919.78 218.871   1
   0  -9  -7 4651.89 335.181   6
   0  -9  -7 4612.45 350.473   9
   0   9   8 7361.80 448.425   2
   0  -9  -8 7672.02 296.199   1
   0  -9  -8 7567.16 438.647   6
   0  -9  -8 6930.16 438.274   9
   0   9   8 7366.05 309.543   8
   0  -9  -9 1680.38 134.765   1
   0  -9  -9 1612.54 208.245   6
   0   9   9 1633.44 223.839   2
   0  -9  -9 1500.31 221.555   9
   0  -9 -10 520.155 138.715   9
   0   9  10 657.312 142.145   2
   0  -9 -10 805.456 100.577   1
   0  -9 -10 702.738 138.725   6
   0   9  11-6.70644 41.8842   1
   0  -9 -11-123.273 93.0653   6
   0   9  11 34.8890 73.7012   2
   0  -9 -11 81.1248 81.5996   9
   0   9  12 316.447 81.3007   1
   0  -9 -12 219.902 96.9305   6
   0   9  12 435.716 131.017   2
   0  -9 -12 151.384 87.9540   9
   0  -9 -13 3623.40 340.221   6
   0  -9 -13 4030.85 382.625   9
   0   9  13 4116.70 382.182   2
   0   9  13 3944.32 238.063   4
   0   9  13 4513.56 291.540   1
   0   9  14 575.113 116.897   1
   0  -9 -14 471.666 158.348   9
   0   9  14 500.662 89.0461   4
   0   9  14 636.202 170.573   2
   0  -9 -14 585.329 157.670   6
   0   9  15 1479.53 183.955   1
   0   9  15 1588.24 247.331   2
   0  -9 -15 1201.15 202.354   6
   0  -9 -15 1147.11 219.122   9
   0   9  16 269.036 118.903   2
   0   9  16 539.340 125.773   1
   0  -9 -16 242.629 122.276   9
   0  -9 -16 101.943 82.0287   6
   0   9  17 136.213 119.173   2
   0  -9 -17 82.8007 107.135   9
   0   9  17 81.5827 61.8256   1
   0  -9 -17-42.2152 90.3240   6
   0   9  18 1055.18 173.993   1
   0  -9 -18 1056.41 206.861   6
   0   9  18 1239.53 247.855   2
   0  -9 -18 1122.61 251.643   9
   0   9  19 891.539 219.752   2
   0  -9 -19 1264.27 274.227   9
   0  -9 -19 1000.66 196.525   6
   0   9  19 1214.31 197.559   1
   0  -9 -20 34.1475 85.4791   6
   0  -9 -20-52.3261 135.705   9
   0   9  20 183.460 122.340   2
   0   9  20 52.2160 77.4735   1
   0  -9 -21 1353.26 248.408   6
   0  -9 -21 1572.04 307.641   9
   0   9  21 2173.78 336.534   2
   0  -9 -22 504.246 199.210   9
   0  -9 -22 190.871 114.521   6
   0   9  22 204.638 133.297   2
   0  -9 -23-103.595 100.881   6
   0 -10  20 54.1062 82.9676   1
   0  10 -19 307.732 168.372  10
   0 -10  19 150.019 108.253   1
   0 -10  18 550.761 162.249   1
   0  10 -18 485.484 162.047  10
   0  10 -17 124.939 137.507  10
   0 -10  17 122.160 76.8590   1
   0  10 -16 1806.48 303.067  10
   0  10 -16 1347.65 192.909   4
   0 -10  16 1040.40 194.757   1
   0  10 -15 263.029 98.2454   4
   0 -10  15 324.591 121.081   1
   0  10 -15 428.646 187.542  10
   0  10 -14 1222.78 180.350   4
   0 -10  14 1338.74 201.744   1
   0  10 -14 1356.24 254.409  10
   0  10 -13-1.24355 100.133  10
   0  10 -13 25.5831 74.0148   4
   0 -10  13-2.17231 61.2567   1
   0  10 -12 541.076 125.868   4
   0  10 -12 275.276 111.736  10
   0 -10  12 252.703 94.9838   1
   0 -10  11 144.537 89.6086   1
   0  10 -11 74.1667 80.1185  10
   0  10 -11-40.7280 79.6814   4
   0 -10  10 0.24395 58.8426   1
   0  10 -10 37.6191 89.7007  10
   0  10 -10-26.1067 79.1848   4
   0  10  -9 32.6368 78.6512  10
   0  10  -9 108.158 73.4742   4
   0 -10   9 194.584 90.3183   1
   0  10  -8 40.6009 62.5326   4
   0 -10   8-24.7050 51.6440   1
   0  10  -7 1479.43 170.276   3
   0 -10   7 1487.55 166.507   1
   0  10  -7 1142.07 86.1478   5
   0  10  -7 1512.38 186.827   4
   0  10  -7 978.786 74.2784   7
   0  10  -7 1106.15 85.8592   7
   0 -10   6 1908.47 180.866   1
   0  10  -6 2112.11 198.185   3
   0  10  -6 2325.81 223.125   4
   0  10  -6 1410.69 109.529   5
   0  10  -6 1669.25 110.609   7
   0  10  -5 1938.67 131.159   7
   0 -10   5 2203.00 182.394   1
   0  10  -5 2035.99 209.186   4
   0  10  -5 2133.27 191.930   3
   0  10  -5 1726.99 130.541   5
   0  10  -4 1170.94 107.519   7
   0 -10   4 1267.02 134.443   1
   0  10  -4 1003.60 106.296   5
   0  10  -4 1046.68 129.478   3
   0 -10   3 861.867 105.064   1
   0  10  -3 685.389 114.687   3
   0  10  -3 758.219 89.6301   7
   0 -10   2 580.202 110.597   6
   0 -10   2 732.907 92.9336   1
   0  10  -2 626.121 102.410   3
   0  10  -2 778.804 94.0658   7
   0 -10   1 1224.57 164.964   6
   0  10  -1 1428.12 152.464   3
   0 -10   1 1184.28 114.353   1
   0 -10   1 1450.34 112.035   8
   0  10   0 399.967 92.1142   3
   0 -10   0 474.702 106.690   6
   0 -10   0 375.501 62.9760   1
   0 -10   0 431.293 60.1758   8
   0 -10  -1 1152.14 92.5099   8
   0 -10  -1 908.036 142.281   6
   0  10   1 1164.69 147.485   3
   0 -10  -2 283.310 44.2598   8
   0  10   2 255.236 68.1731   3
   0  10   2 234.490 89.5956   2
   0 -10  -2 315.884 90.4607   6
   0 -10  -3 274.271 88.6127   6
   0  10   3 445.467 95.9915   3
   0 -10  -3 420.572 53.6379   8
   0  10   3 454.464 119.952   2
   0  10   4 1138.41 95.1521   8
   0  10   4 1197.92 175.671   2
   0 -10  -4 883.731 149.226   9
   0 -10  -4 1082.40 93.2501   1
   0 -10  -4 787.243 124.575   6
   0  10   4 1255.07 152.870   3
   0 -10  -5 163.191 78.7299   6
   0  10   5 118.367 62.8981   2
   0  10   5 263.434 55.4181   8
   0 -10  -5 186.509 41.8990   1
   0 -10  -5-10.8770 80.3803   9
   0 -10  -6 768.002 80.5592   1
   0 -10  -6 759.716 144.999   9
   0 -10  -6 756.029 145.918   6
   0  10   6 790.004 146.152   2
   0  10   6 758.927 86.8031   8
   0  10   7 2462.89 165.040   8
   0 -10  -7 2580.53 268.816   9
   0  10   7 2533.67 261.299   2
   0 -10  -7 2433.13 252.925   6
   0 -10  -7 2579.11 153.747   1
   0 -10  -8 309.987 124.166   9
   0 -10  -8 234.903 97.2041   6
   0  10   8 498.059 81.2231   8
   0  10   8 484.819 133.374   2
   0 -10  -8 457.879 68.8430   1
   0 -10  -9 5115.83 377.737   6
   0 -10  -9 4359.70 367.939   9
   0 -10  -9 4477.46 230.885   1
   0  10   9 5069.17 384.935   2
   0 -10 -10 609.677 89.2676   1
   0  10  10 555.911 137.647   2
   0 -10 -10 895.360 179.012   9
   0 -10 -10 807.459 163.877   6
   0 -10 -11 1188.98 197.931   6
   0 -10 -11 1234.46 215.993   9
   0 -10 -11 1264.31 130.766   1
   0  10  11 1159.34 194.465   2
   0 -10 -12-0.63009 96.6346   9
   0  10  12-77.8996 96.9937   2
   0 -10 -12 72.1393 88.7086   6
   0  10  13 571.357 171.009   2
   0 -10 -13 493.827 141.466   6
   0 -10 -13 209.537 108.417   9
   0  10  13 553.056 104.843   1
   0  10  13 486.040 91.1132   4
   0 -10 -14 220.848 119.941   9
   0  10  14 461.792 96.3552   1
   0  10  14 364.498 132.441   2
   0 -10 -14 403.621 126.107   6
   0  10  14 483.583 92.3927   4
   0 -10 -15 765.767 173.840   6
   0  10  15 804.138 183.399   2
   0  10  15 911.095 140.078   1
   0 -10 -15 857.326 197.239   9
   0  10  16-58.9587 113.521   2
   0 -10 -16 1.68951 83.0068   6
   0 -10 -16 42.8175 104.343   9
   0  10  16-62.1420 61.4124   1
   0 -10 -17 761.995 181.677   6
   0  10  17 976.690 165.138   1
   0  10  17 854.155 201.836   2
   0 -10 -17 657.726 192.967   9
   0  10  18 1652.95 216.466   1
   0 -10 -18 907.851 200.748   6
   0  10  18 1689.87 291.711   2
   0 -10 -18 1533.80 286.643   9
   0 -10 -19 44.2815 121.100   6
   0 -10 -19-38.3573 115.611   9
   0  10  19 186.371 152.732   2
   0  10  20 2880.56 405.549   2
   0 -10 -20 2077.59 347.029   9
   0 -10 -20 2788.38 355.304   6
   0 -10 -21 144.916 144.762   9
   0  10  21 75.5386 104.624   2
   0 -10 -21 28.5491 120.926   6
   0 -10 -22 1076.60 265.316   9
   0 -10 -22 997.521 218.586   6
   0 -11  19 1553.17 266.277   1
   0  11 -18 33.8989 114.521  10
   0 -11  18 169.895 111.035   1
   0 -11  17 37.3767 72.7998   1
   0  11 -17 117.589 117.696  10
   0 -11  16 544.924 155.744   1
   0  11 -16 750.357 162.062   4
   0  11 -16 823.637 230.338  10
   0  11 -15 2066.17 326.489  10
   0  11 -15 1851.85 239.076   4
   0 -11  15 1704.17 237.197   1
   0  11 -14 22.7711 113.942  10
   0  11 -14 92.8268 94.6432   4
   0 -11  14-21.5813 83.1730   1
   0  11 -13 1160.98 232.555  10
   0  11 -13 1132.03 185.257   4
   0 -11  13 1038.46 177.976   1
   0 -11  12 6.11974 76.2129   1
   0  11 -12 11.7851 102.608  10
   0  11 -12-81.3456 92.0626   4
   0  11 -11 613.001 141.758   4
   0 -11  11 708.263 135.547   1
   0  11 -11 758.653 186.651  10
   0 -11  10 261.361 87.8105   1
   0  11 -10 213.583 139.373  10
   0  11 -10 206.256 79.1773   4
   0  11  -9 310.509 102.703   4
   0  11  -9 271.858 107.929  10
   0 -11   9 312.557 88.0646   1
   0  11  -8 139.326 76.0872   3
   0  11  -8 21.7243 16.4012   7
   0  11  -8-97.5668 81.8618   4
   0 -11   8 92.6935 69.1858   1
   0  11  -7 210.506 87.4078   4
   0 -11   7 106.530 47.4902   1
   0  11  -7 125.420 79.8046   3
   0  11  -7 82.8365 26.6015   7
   0  11  -7 135.798 36.7713   5
   0  11  -6 28.3149 59.8612   4
   0 -11   6-108.735 70.4439   1
   0  11  -6-25.5425 58.1713   3
   0  11  -6-13.3859 31.5080   7
   0  11  -6 6.57988 31.3843   5
   0 -11   5 1656.49 162.240   1
   0  11  -5 1549.06 124.875   7
   0  11  -5 1931.04 213.991   4
   0  11  -5 1873.69 190.859   3
   0  11  -5 1448.74 125.426   5
   0 -11   4 907.307 121.629   1
   0  11  -4 803.187 96.0268   7
   0  11  -4 695.568 96.0088   5
   0  11  -4 675.555 133.638   4
   0  11  -4 1057.18 141.457   3
   0  11  -3 1039.92 138.780   3
   0  11  -3 920.581 105.775   7
   0 -11   3 1044.95 119.211   1
   0  11  -2 123.843 60.2989   3
   0 -11   2 135.920 49.1496   8
   0 -11   2 150.671 51.7625   1
   0 -11   2 54.5503 64.3482   6
   0 -11   1 763.249 137.115   6
   0 -11   1 686.820 94.2279   1
   0  11  -1 837.574 124.698   3
   0 -11   1 837.173 87.4170   8
   0 -11   0 718.004 78.3923   8
   0 -11   0 536.591 75.9550   1
   0  11   0 669.869 108.285   3
   0 -11   0 304.134 91.3575   6
   0 -11  -1 62.8823 65.3189   6
   0 -11  -1 88.2142 44.6758   1
   0  11   1 123.968 76.1778   3
   0 -11  -1 84.0960 35.6877   8
   0 -11  -2-5.30650 25.9327   8
   0 -11  -2-48.0211 63.6648   6
   0  11   2 14.1802 57.5478   3
   0  11   3-80.0010 77.0132   2
   0 -11  -3 23.3312 27.1643   8
   0 -11  -3-12.3831 59.9081   6
   0  11   3 46.8347 57.7354   3
   0 -11  -4 40.6850 27.4142   1
   0  11   4 34.9909 70.0210   2
   0  11   4 161.143 73.9151   3
   0 -11  -4 45.6222 73.1159   9
   0 -11  -4 23.1624 78.3001   6
   0 -11  -5-40.1005 29.2164   1
   0 -11  -5-159.389 111.879   6
   0  11   5-91.9603 80.4418   3
   0  11   5 2.49128 30.1049   8
   0  11   5 6.52132 69.3003   2
   0 -11  -5-24.5748 79.9177   9
   0  11   6 247.569 96.9725   2
   0 -11  -6 326.677 98.9215   9
   0 -11  -6 249.340 49.7298   1
   0  11   6 330.606 61.6801   8
   0 -11  -6 128.909 73.2296   6
   0  11   7 16.2361 31.7556   8
   0  11   7 101.893 72.0079   2
   0 -11  -7-5.98035 28.4610   1
   0 -11  -7-52.6696 78.9685   9
   0 -11  -7 30.3403 67.5045   6
   0 -11  -8 537.310 135.711   6
   0  11   8 720.899 162.631   2
   0 -11  -8 728.832 85.7446   1
   0  11   8 600.230 85.6761   8
   0 -11  -8 590.958 147.872   9
   0  11   9 152.720 96.2125   2
   0 -11  -9-9.24157 32.9626   1
   0 -11  -9 149.521 103.327   6
   0 -11  -9 107.751 90.9266   9
   0 -11 -10 1637.12 228.258   6
   0 -11 -10 1502.04 235.412   9
   0 -11 -10 1493.04 133.605   1
   0  11  10 1457.93 220.600   2
   0  11  11 105.621 101.709   2
   0 -11 -11 10.1930 37.4894   1
   0 -11 -11 19.0050 89.6840   6
   0 -11 -11 29.1786 80.3093   9
   0 -11 -12 37.2642 89.5822   9
   0  11  12 127.730 97.6597   2
   0  11  12 118.137 60.5998   4
   0 -11 -12 106.802 98.8347   6
   0 -11 -13 15.1281 101.133   9
   0 -11 -13 165.019 93.6647   6
   0  11  13-54.3003 109.337   2
   0  11  13 120.725 55.5703   4
   0 -11 -14 1304.07 244.266   9
   0 -11 -14 1159.12 212.043   6
   0  11  14 1489.42 157.127   4
   0  11  14 1141.14 225.776   2
   0 -11 -15 89.7026 101.933   6
   0  11  15 11.2498 89.1670   2
   0 -11 -15 148.677 103.807   9
   0 -11 -16 1175.50 239.739   9
   0  11  16 1602.77 268.704   2
   0 -11 -16 1177.12 215.146   6
   0 -11 -17 881.783 187.876   6
   0 -11 -17 1005.54 237.028   9
   0  11  17 862.620 228.698   2
   0  11  18 16.8527 88.5855   2
   0 -11 -18-81.2986 108.850   6
   0 -11 -18-213.449 126.646   9
   0 -11 -19 1389.80 291.831   9
   0  11  19 1204.90 259.646   2
   0 -11 -19 1273.90 244.439   6
   0 -11 -20 731.842 232.709   9
   0 -11 -20 678.900 186.367   6
   0  11  20 1098.35 265.390   2
   0  11  21 2159.37 359.269   2
   0 -11 -21 1545.43 328.312   9
   0 -11 -21 2027.29 314.885   6
   0 -12  18 47.3373 83.7311   1
   0 -12  17-73.2848 75.6259   1
   0  12 -17 322.492 171.054  10
   0 -12  16 214.595 118.591   1
   0  12 -16 221.499 108.356   4
   0  12 -16 220.239 135.562  10
   0 -12  15 589.026 153.530   1
   0  12 -15 421.920 169.462  10
   0  12 -15 535.232 153.524   4
   0  12 -14 1696.62 303.866  10
   0  12 -14 1338.84 210.911   4
   0 -12  14 1722.46 241.339   1
   0  12 -13 187.052 126.496  10
   0 -12  13 597.526 144.811   1
   0  12 -13 570.099 144.947   4
   0  12 -12 1664.47 280.325  10
   0  12 -12 1422.06 211.376   4
   0 -12  12 1542.74 214.628   1
   0  12 -11 505.216 154.852  10
   0  12 -11 70.6351 78.6190   4
   0 -12  11 358.810 115.633   1
   0 -12  10 1501.46 198.216   1
   0  12 -10 1809.37 269.728  10
   0  12 -10 1458.26 208.402   4
   0 -12   9 41.7633 58.6085   1
   0  12  -9 252.071 97.1283   4
   0  12  -9 242.959 109.724  10
   0 -12   8 119.875 64.4297   1
   0  12  -8 98.6957 72.6347   4
   0  12  -8 167.592 79.6788   3
   0  12  -7-36.4440 71.9467   4
   0 -12   7 68.2839 62.9527   1
   0  12  -7 20.4219 56.3530   3
   0  12  -6 407.682 107.934   3
   0 -12   6 237.963 83.3204   1
   0  12  -6 208.828 51.2483   7
   0  12  -6 199.303 88.5622   4
   0  12  -5 103.403 38.2457   7
   0  12  -5 139.327 58.4541   3
   0  12  -5 79.7877 34.3321   5
   0 -12   5 224.790 61.3205   1
   0  12  -5 151.499 78.4360   4
   0  12  -4 171.117 56.1762   5
   0 -12   4 241.689 66.2688   1
   0  12  -4 167.347 92.1742   4
   0  12  -4 189.435 58.5180   7
   0  12  -4 213.626 72.3043   3
   0  12  -3 64.1855 75.8649   4
   0  12  -3 34.3130 51.9604   3
   0 -12   3 79.9635 40.1152   8
   0 -12   3 12.2413 42.2269   1
   0 -12   2 347.009 67.4018   1
   0 -12   2 331.818 63.7013   8
   0  12  -2 277.473 77.2211   3
   0 -12   1 288.236 59.0716   8
   0 -12   1 262.015 60.6694   1
   0 -12   1 155.627 75.8125   6
   0  12  -1 287.110 88.2019   3
   0  12   0 511.400 110.299   3
   0 -12   0 296.363 105.363   6
   0 -12   0 645.610 93.8002   1
   0 -12   0 667.975 78.1066   8
   0 -12  -1 3044.98 284.780   6
   0 -12  -1 3822.64 186.026   8
   0 -12  -1 3078.64 185.567   1
   0  12   1 4047.85 284.199   3
   0 -12  -2 63.9869 25.1169   8
   0  12   2 257.449 93.1145   3
   0 -12  -2 191.204 88.5782   6
   0 -12  -3 92.9620 69.7131   6
   0 -12  -3 18.3299 24.1638   8
   0  12   3-16.0890 54.4472   3
   0  12   3-91.6107 90.7369   2
   0 -12  -4 383.942 110.847   6
   0 -12  -4 231.606 95.6517   9
   0 -12  -4 359.181 59.5753   1
   0  12   4 348.546 91.7363   3
   0  12   4 468.264 121.899   2
   0  12   5-64.7156 76.6128   3
   0 -12  -5-43.9486 91.9362   6
   0 -12  -5-91.8230 84.9302   9
   0 -12  -5-34.6303 29.5449   1
   0  12   5-134.062 97.8246   2
   0 -12  -6 407.840 117.759   6
   0  12   6 232.587 75.9607   3
   0  12   6 371.485 65.0342   8
   0  12   6 650.596 148.905   2
   0 -12  -6 580.896 141.856   9
   0 -12  -6 382.116 60.8160   1
   0 -12  -7 20.1701 26.0978   1
   0  12   7-86.3796 83.0572   2
   0 -12  -7-76.5408 81.2860   6
   0 -12  -7-7.66020 92.3051   9
   0  12   7 51.0275 40.0288   8
   0 -12  -8 230.742 50.3672   1
   0 -12  -8 266.764 103.784   6
   0 -12  -8 255.920 119.030   9
   0  12   8 175.683 94.0985   2
   0 -12  -9 1103.27 205.521   9
   0 -12  -9 824.173 92.5275   1
   0 -12  -9 912.852 177.931   6
   0  12   9 1086.86 199.604   2
   0 -12 -10 60.6652 74.5541   6
   0  12  10 112.397 83.2984   2
   0 -12 -10 18.5864 98.7101   9
   0  12  11 1021.21 200.941   2
   0  12  11 1112.70 148.591   4
   0 -12 -11 1028.15 199.745   9
   0 -12 -11 893.319 185.891   6
   0 -12 -12 586.421 178.605   9
   0  12  12 485.940 159.369   2
   0 -12 -12 686.453 165.984   6
   0  12  12 432.085 98.0473   4
   0  12  13 190.830 68.8672   4
   0 -12 -13 115.194 110.221   6
   0  12  13 166.994 112.434   2
   0 -12 -13 215.664 148.394   9
   0 -12 -14-99.3376 121.219   9
   0  12  14 55.8429 49.4741   4
   0  12  14 166.114 117.993   2
   0 -12 -14 88.6390 94.2145   6
   0  12  15 1469.63 253.040   2
   0 -12 -15 1271.29 255.677   9
   0 -12 -15 1621.85 259.320   6
   0 -12 -16 77.6633 100.559   6
   0 -12 -16-136.009 132.125   9
   0  12  16 51.6077 90.6756   2
   0 -12 -17 190.490 138.856   9
   0  12  17 266.577 153.266   2
   0 -12 -17 261.516 122.077   6
   0  12  18 496.903 185.629   2
   0 -12 -18 458.123 185.890   9
   0 -12 -18 152.437 103.905   6
   0 -12 -19-9.15499 116.935   6
   0  12  19 133.294 137.484   2
   0 -12 -19 187.186 134.299   9
   0 -12 -20 467.378 188.188   6
   0  12  20 660.167 214.593   2
   0 -12 -20 545.058 205.375   9
   0 -13  18 16.1030 78.8570   1
   0 -13  17 1038.89 204.441   1
   0 -13  16 326.934 132.412   1
   0  13 -16 550.146 212.787  10
   0  13 -16 573.578 160.469   4
   0 -13  15 234.781 113.293   1
   0  13 -15 244.970 126.818  10
   0  13 -15 471.936 146.454   4
   0  13 -14 1103.31 242.712  10
   0 -13  14 907.073 187.919   1
   0  13 -14 969.066 189.562   4
   0  13 -13 176.043 136.193  10
   0  13 -13 115.881 92.7831   4
   0 -13  13 185.679 86.3656   1
   0  13 -12 1249.04 204.369   4
   0 -13  12 1729.65 227.330   1
   0  13 -12 1577.70 265.369  10
   0  13 -11 1383.04 253.718  10
   0  13 -11 1327.52 217.929   4
   0 -13  11 1446.35 200.368   1
   0  13 -10-53.2873 95.3776   4
   0 -13  10 187.703 93.2914   1
   0  13 -10 81.6393 106.123  10
   0  13  -9 1244.05 196.616   4
   0 -13   9 1208.23 170.904   1
   0  13  -9 1077.93 221.974  10
   0  13  -8 562.250 143.724   4
   0 -13   8 290.800 88.0838   1
   0  13  -8 567.248 124.697   3
   0 -13   7 356.522 98.7507   1
   0  13  -7 408.459 108.652   3
   0  13  -7 422.757 118.947   4
   0  13  -6 528.479 131.978   4
   0  13  -6 408.055 112.150   3
   0 -13   6 472.970 100.498   1
   0 -13   5 40.6162 58.9101   1
   0  13  -5 116.852 84.6593   4
   0  13  -5 13.8870 66.0023   3
   0  13  -4 135.473 96.6915   4
   0 -13   4 6.90439 51.9084   1
   0  13  -4 52.7250 73.2776   3
   0 -13   3 652.631 101.704   1
   0  13  -3 801.572 162.702   4
   0  13  -3 618.525 126.326   3
   0 -13   3 782.143 97.7833   8
   0  13  -2 83.2718 56.9047   3
   0 -13   2 141.370 47.6918   1
   0  13  -2 261.713 114.818   4
   0 -13   2 296.271 64.1764   8
   0 -13   1 944.250 111.139   1
   0 -13   1 1031.80 104.968   8
   0 -13   1 513.330 119.219   6
   0  13  -1 859.097 133.882   3
   0  13  -1 1022.76 174.101   4
   0  13   0 1947.17 202.940   3
   0 -13   0 1467.57 210.930   6
   0 -13   0 2157.35 143.436   8
   0 -13   0 1977.26 157.456   1
   0 -13  -1 810.091 108.497   1
   0  13   1 932.273 149.143   3
   0 -13  -1 891.224 90.2185   8
   0 -13  -1 662.205 150.294   6
   0 -13  -2 5646.18 254.816   1
   0 -13  -2 5287.61 391.422   6
   0  13   2 7321.05 400.094   3
   0 -13  -2 6098.84 242.323   8
   0  13   3 75.6644 87.2164   3
   0  13   3 10.3967 87.2182   2
   0 -13  -3-71.6329 44.6725   8
   0 -13  -3 82.2215 81.3756   6
   0 -13  -4 256.999 49.7370   1
   0 -13  -4 174.761 67.6189   6
   0  13   4 364.396 99.8816   3
   0  13   4 316.244 123.054   2
   0 -13  -4 166.968 104.643   9
   0 -13  -5 369.292 111.270   6
   0  13   5 623.046 158.252   2
   0  13   5 754.204 138.941   3
   0 -13  -5 558.127 151.468   9
   0 -13  -5 568.472 72.8871   1
   0 -13  -6 227.620 119.013   9
   0  13   6 43.4741 75.1655   3
   0  13   6 179.686 108.472   2
   0 -13  -6 81.7532 72.0520   6
   0 -13  -7 518.317 141.340   9
   0  13   7 622.792 155.625   2
   0  13   7 431.529 123.546   3
   0 -13  -7 304.433 109.541   6
   0 -13  -8 978.846 199.528   6
   0 -13  -8 1404.33 233.200   9
   0  13   8 1560.95 233.571   2
   0 -13  -9 43.1497 78.5023   6
   0  13   9 46.7964 96.6858   2
   0 -13  -9 151.442 106.556   9
   0 -13 -10-19.5534 98.0415   6
   0 -13 -10-131.299 102.316   9
   0  13  10 59.4199 79.4152   2
   0  13  10 20.1881 57.3255   4
   0  13  11 1268.45 237.590   2
   0 -13 -11 809.803 189.049   9
   0  13  11 1079.49 160.749   4
   0 -13 -11 1351.46 228.755   6
   0 -13 -12 1038.07 230.559   9
   0  13  12 726.972 126.218   4
   0  13  12 1100.58 224.809   2
   0 -13 -12 733.256 196.497   6
   0 -13 -13 942.511 207.005   6
   0  13  13 958.077 139.115   4
   0 -13 -13 1493.42 264.985   9
   0  13  13 1306.60 244.614   2
   0  13  14 117.384 65.9456   4
   0 -13 -14 58.8977 112.612   9
   0 -13 -14-93.8828 85.5182   6
   0 -13 -15 271.692 136.819   6
   0  13  15 163.841 114.332   2
   0 -13 -15 219.236 131.901   9
   0 -13 -16 21.0150 84.2794   6
   0  13  16-14.3447 122.115   2
   0 -13 -16-22.3883 110.852   9
   0 -13 -17 559.559 169.547   6
   0  13  17 753.409 202.365   2
   0 -13 -17 508.020 190.765   9
   0 -13 -18 205.047 144.000   9
   0  13  18-236.475 159.742   2
   0 -13 -18-47.1109 97.4242   6
   0 -13 -19 102.531 91.3598   6
   0 -13 -19-38.8082 133.497   9
   0  13  19-89.7628 132.137   2
   0 -14  17 116.752 89.8471   1
   0  14 -16 34.2430 95.4503   4
   0 -14  16 403.425 142.415   1
   0  14 -15 686.709 210.233  10
   0 -14  15 523.290 155.599   1
   0  14 -15 690.188 180.190   4
   0  14 -14 195.075 134.383  10
   0  14 -14-87.7950 110.481   4
   0 -14  14 348.690 134.517   1
   0 -14  13 774.535 163.269   1
   0  14 -13 416.673 163.310  10
   0  14 -13 556.239 151.128   4
   0 -14  12 282.411 103.708   1
   0  14 -12 412.701 151.249   4
   0  14 -12 334.203 155.751  10
   0  14 -11 1066.75 209.825   4
   0  14 -11 1421.92 259.300  10
   0 -14  11 1082.59 176.796   1
   0  14 -10 163.158 90.4566   4
   0 -14  10 501.947 123.637   1
   0  14 -10 141.144 101.907  10
   0  14  -9-208.733 140.933  10
   0  14  -9-43.5965 85.1875   4
   0 -14   9-20.5825 59.1939   1
   0  14  -8 413.663 130.821   4
   0  14  -8 564.827 129.254   3
   0 -14   8 426.719 112.485   1
   0 -14   7 4160.85 310.348   1
   0  14  -7 4860.49 357.161   3
   0  14  -7 4983.05 401.947   4
   0  14  -6 106.118 91.9878   4
   0 -14   6 294.814 92.6520   1
   0  14  -6 22.4598 69.4786   3
   0  14  -5 868.208 184.394   4
   0 -14   5 666.557 114.953   1
   0  14  -5 855.440 142.782   3
   0 -14   4 113.961 53.4060   8
   0  14  -4 136.164 78.4562   3
   0 -14   4 52.0791 56.4619   1
   0  14  -4 175.448 109.080   4
   0  14  -3 115.113 57.7544   3
   0 -14   3 65.4864 39.5405   1
   0 -14   3 103.786 50.4706   8
   0  14  -3 174.467 110.266   4
   0  14  -2-86.3390 93.2318   4
   0  14  -2-132.693 88.6983   3
   0 -14   2-107.679 60.0653   1
   0 -14   2-2.17018 33.7801   8
   0  14  -1 268.081 114.993   4
   0  14  -1 245.262 88.6836   3
   0 -14   1 285.370 58.0024   8
   0 -14   1 216.097 98.4644   6
   0 -14   1 318.504 72.0419   1
   0 -14   0 1017.19 117.828   1
   0  14   0 1018.48 156.743   3
   0  14   0 1109.85 181.303   4
   0 -14   0 703.263 151.097   6
   0 -14   0 1383.67 116.794   8
   0 -14  -1 612.793 90.4727   1
   0 -14  -1 615.179 73.8104   8
   0  14   1 428.139 123.451   4
   0 -14  -1 521.757 126.156   6
   0  14   1 587.848 127.698   3
   0  14   2 237.141 105.334   4
   0 -14  -2 320.618 106.651   6
   0  14   2 303.923 107.826   3
   0 -14  -2 282.616 60.6472   1
   0 -14  -2 548.038 69.6930   8
   0 -14  -3 890.014 91.8055   1
   0 -14  -3 831.870 165.778   6
   0  14   3 897.344 152.352   3
   0 -14  -4 28.7859 91.4982   9
   0  14   4-3.65429 83.5785   2
   0 -14  -4 46.9880 65.3341   6
   0  14   4 34.5360 74.4241   3
   0  14   5 944.236 166.756   3
   0 -14  -5 1049.31 204.986   9
   0 -14  -5 879.187 166.325   6
   0  14   5 778.958 181.337   2
   0 -14  -6 559.156 153.396   9
   0  14   6 548.147 121.753   3
   0 -14  -6 428.238 122.890   6
   0  14   6 583.796 163.756   2
   0  14   7-40.1559 93.6639   3
   0 -14  -7 65.0200 120.610   9
   0  14   7 12.4716 67.3151   4
   0  14   7 12.5790 92.1632   2
   0 -14  -7-115.166 103.885   6
   0 -14  -8 7.86408 88.2307   9
   0 -14  -8 216.498 104.914   6
   0  14   8 127.692 78.2700   4
   0  14   8 162.450 114.059   3
   0  14   8 196.092 111.596   2
   0  14   9 1542.44 200.258   4
   0 -14  -9 1645.50 260.503   9
   0 -14  -9 1423.23 246.358   6
   0  14   9 1554.40 257.033   2
   0  14  10 1163.68 218.020   2
   0  14  10 1494.61 199.514   4
   0 -14 -10 1300.65 224.923   6
   0 -14 -10 1209.36 238.432   9
   0  14  11 174.259 76.7450   4
   0 -14 -11-21.1541 92.7619   9
   0 -14 -11 67.2672 85.9096   6
   0  14  11 292.806 135.771   2
   0 -14 -12 145.681 89.1461   6
   0  14  12 98.6387 67.3735   4
   0 -14 -12 100.604 89.7087   9
   0  14  12 133.562 92.3040   2
   0 -14 -13 680.399 206.324   9
   0  14  13 295.469 98.9455   4
   0 -14 -13 574.811 177.381   6
   0  14  13 367.928 156.373   2
   0  14  14 854.792 208.726   2
   0 -14 -14 758.756 194.782   6
   0 -14 -14 1033.45 240.009   9
   0  14  14 704.028 141.222   4
   0 -14 -15 336.642 141.631   6
   0  14  15 235.973 138.858   2
   0 -14 -15-55.3053 145.617   9
   0 -14 -16 394.550 155.747   9
   0  14  16 358.492 144.261   2
   0 -14 -16 421.120 149.346   6
   0  14  17-108.278 139.751   2
   0 -14 -17 57.6907 93.3439   6
   0 -14 -17 80.1980 115.568   9
   0 -14 -18 304.374 176.491   9
   0  14  18 398.140 152.824   2
   0 -14 -18 306.287 162.538   6
   0  15 -16 376.116 140.184   4
   0 -15  16 515.012 155.643   1
   0 -15  15 227.235 104.329   1
   0  15 -15-125.970 121.433   4
   0 -15  14 30.1591 84.4587   1
   0  15 -14 193.446 114.428   4
   0  15 -14 142.985 118.476  10
   0 -15  13 691.228 166.697   1
   0  15 -13 575.299 157.155   4
   0  15 -13 526.659 182.461  10
   0 -15  12 116.855 76.5145   1
   0  15 -12-87.8017 138.929  10
   0  15 -12 54.1553 104.037   4
   0 -15  11 366.617 116.316   1
   0  15 -11 121.165 105.916   4
   0  15 -11 192.085 126.462  10
   0  15 -10-11.0279 98.5682  10
   0 -15  10-27.4788 71.2097   1
   0  15 -10-49.2641 108.684   4
   0  15  -9 227.174 100.249   4
   0  15  -9 161.860 111.961  10
   0 -15   9 180.870 62.8435   1
   0 -15   8 590.862 124.853   1
   0  15  -8 658.778 168.898   4
   0  15  -8 970.082 170.580   3
   0  15  -7 1901.05 227.553   3
   0 -15   7 1936.94 210.248   1
   0  15  -7 2201.62 288.111   4
   0  15  -6 2305.07 284.583   4
   0  15  -6 2302.84 244.953   3
   0 -15   6 2035.75 212.403   1
   0  15  -5 4517.92 341.606   3
   0 -15   5 4164.76 293.887   1
   0  15  -5 4886.09 405.358   4
   0 -15   5 5620.13 304.875   8
   0 -15   4 31.6217 48.2082   1
   0  15  -4 186.614 89.2139   3
   0 -15   3 738.859 113.797   1
   0  15  -3 697.302 163.665   4
   0  15  -3 427.747 111.704   3
   0 -15   2-89.1264 55.7047   1
   0  15  -2 69.5932 95.3225   4
   0  15  -2-92.9031 79.9128   3
   0 -15   1 144.497 89.9841   6
   0  15  -1 208.971 91.0518   3
   0  15  -1 268.780 112.407   4
   0 -15   1 200.710 67.6187   1
   0 -15   0 499.641 141.501   6
   0  15   0 278.299 112.562   4
   0 -15   0 251.336 62.3643   1
   0  15   0 521.667 127.392   3
   0  15   1 67.4449 80.1446   4
   0  15   1 0.65118 67.9994   3
   0 -15  -1-20.4813 72.2381   6
   0 -15  -1 164.580 52.9931   1
   0 -15  -2-9.43260 79.5155   6
   0  15   2-79.6297 89.9006   3
   0  15   2 21.8331 70.6586   4
   0 -15  -3 210.339 98.1492   6
   0  15   3 143.612 92.9441   4
   0  15   3 276.104 105.926   3
   0 -15  -4 276.246 123.244   6
   0  15   4 117.394 76.3775   4
   0  15   4 95.7004 71.4340   3
   0 -15  -4 129.194 100.836   9
   0 -15  -5 118.782 106.671   9
   0 -15  -5-54.5805 83.2648   6
   0  15   5 56.7184 91.2958   3
   0  15   5 275.871 111.580   4
   0  15   5 232.910 120.865   2
   0 -15  -6 2604.93 320.070   9
   0 -15  -6 3212.93 345.145   6
   0  15   6 3176.59 354.725   2
   0  15   6 3145.07 304.169   3
   0  15   6 2988.57 295.290   4
   0  15   7-21.2686 69.2705   3
   0 -15  -7-169.558 125.698   9
   0 -15  -7 62.5318 80.1561   6
   0  15   7-19.8395 97.5329   2
   0  15   7 112.727 85.8577   4
   0  15   8 338.890 115.801   4
   0  15   8 294.593 131.820   2
   0  15   8 319.379 130.335   3
   0 -15  -8 146.935 103.218   9
   0 -15  -8 202.456 113.372   6
   0 -15  -9 939.842 200.691   6
   0  15   9 1102.43 172.537   4
   0  15   9 1248.14 238.665   2
   0 -15  -9 1544.47 264.960   9
   0  15   9 1048.01 187.673   3
   0 -15 -10 261.217 143.751   9
   0  15  10 473.536 119.482   4
   0  15  10 285.249 138.682   2
   0 -15 -10 336.015 151.553   6
   0  15  11 800.870 199.305   2
   0 -15 -11 901.760 198.986   6
   0  15  11 963.622 173.112   4
   0 -15 -11 651.502 186.096   9
   0  15  12 103.172 89.8570   2
   0  15  12 23.0861 61.3669   4
   0 -15 -12-274.655 158.387   9
   0 -15 -12-152.367 121.707   6
   0 -15 -13 15.9580 95.9608   6
   0 -15 -13-25.6759 121.030   9
   0  15  13 92.5149 70.3061   4
   0  15  13-99.7445 120.578   2
   0 -15 -14 201.547 130.420   9
   0  15  14-13.9728 125.433   2
   0 -15 -14 345.277 141.922   6
   0 -15 -15 92.7080 114.009   6
   0 -15 -15-175.055 120.433   9
   0  15  15 32.7070 95.6990   2
   0  15  16 525.818 183.555   2
   0 -15 -16 442.982 158.043   6
   0 -15 -16 476.541 165.489   9
   0 -15 -17-2.02088 131.274   9
   0 -15 -17 391.214 159.633   6
   0  15  17 308.363 173.538   2
   0  16 -16-198.163 133.200   4
   0 -16  16 2.04657 77.1968   1
   0 -16  15 267.469 119.870   1
   0  16 -15 2.95757 101.517   4
   0  16 -14 14.8117 95.6381   4
   0 -16  14 28.9967 73.1136   1
   0  16 -13-33.3664 101.775   4
   0 -16  13-2.73169 92.7263   1
   0  16 -12-78.4236 138.846  10
   0 -16  12 149.438 92.8565   1
   0  16 -12-93.4787 112.396   4
   0  16 -11 517.648 189.527  10
   0 -16  11 426.679 137.578   1
   0  16 -11 409.802 142.661   4
   0 -16  10 188.454 94.4534   1
   0  16 -10 63.5090 88.3989   4
   0  16 -10 154.710 124.577  10
   0  16  -9 20.2939 98.4510  10
   0 -16   9 274.506 87.2561   1
   0  16  -9 266.082 118.490   4
   0 -16   8 1060.78 174.256   1
   0  16  -8 1154.20 186.923   3
   0  16  -8 1016.86 218.030   4
   0  16  -7 267.599 103.976   3
   0 -16   7 80.7283 78.2736   1
   0  16  -7 112.714 85.0538   4
   0  16  -6 2358.29 253.984   3
   0  16  -6 2352.10 304.827   4
   0 -16   6 2299.79 228.798   1
   0  16  -5 448.869 112.186   3
   0 -16   5 485.016 111.364   1
   0  16  -5 539.151 171.248   4
   0  16  -4 492.236 116.410   3
   0 -16   4 289.904 70.6232   1
   0  16  -4 790.485 180.917   4
   0  16  -3 147.874 100.847   4
   0  16  -3 22.8924 72.2615   3
   0  16  -2-139.989 96.7617   3
   0  16  -2 107.837 83.2548   4
   0  16  -1 169.098 98.6867   4
   0  16  -1 276.502 89.3828   3
   0  16   0 1304.56 216.148   4
   0  16   0 1565.73 201.500   3
   0 -16   0 1136.00 202.754   6
   0  16   1-76.7231 72.2645   3
   0  16   1 63.0875 80.3775   4
   0 -16  -1-120.250 102.360   6
   0  16   2 379.093 118.980   3
   0  16   2 395.341 124.076   4
   0 -16  -2 150.493 91.8532   6
   0  16   3 166.783 87.2381   3
   0 -16  -3 73.0917 78.5070   6
   0  16   3 131.047 76.1764   4
   0  16   4-72.0061 70.0256   3
   0 -16  -4 107.867 90.2449   6
   0 -16  -4-34.7408 109.456   9
   0 -16  -5 1871.34 269.081   6
   0 -16  -5 1562.20 258.446   9
   0  16   5 1953.71 250.475   4
   0  16   5 1846.47 272.602   2
   0  16   5 1588.56 214.275   3
   0 -16  -6 29.5694 88.6807   9
   0  16   6-60.8367 101.578   2
   0 -16  -6 68.3154 112.981   6
   0  16   6 175.306 120.900   4
   0  16   6-16.4015 82.9538   3
   0  16   7 2514.51 284.576   4
   0  16   7 2389.02 274.483   3
   0 -16  -7 2150.04 295.676   6
   0  16   7 2348.39 321.752   2
   0 -16  -7 2131.90 308.637   9
   0 -16  -8 236.753 126.147   6
   0 -16  -8 297.429 145.208   9
   0  16   8 345.260 172.237   3
   0  16   8 279.544 111.375   4
   0  16   8-1.00529 105.399   2
   0 -16  -9 295.639 149.265   9
   0  16   9 177.649 84.4855   4
   0  16   9 206.085 118.558   3
   0 -16  -9 394.008 153.874   6
   0  16   9 362.151 149.303   2
   0 -16 -10 1363.59 250.747   6
   0 -16 -10 1740.83 286.725   9
   0  16  10 1944.76 235.568   4
   0  16  10 1731.82 251.016   3
   0  16  10 1669.66 277.274   2
   0 -16 -11 115.386 118.689   9
   0  16  11-277.442 142.348   3
   0  16  11 58.7088 80.2771   4
   0 -16 -11 12.5668 90.4814   6
   0  16  11 19.4175 109.363   2
   0 -16 -12-61.6498 111.277   6
   0  16  12 102.726 121.333   2
   0  16  12-16.7135 72.6005   4
   0 -16 -12-153.528 145.352   9
   0 -16 -13-1.68790 80.6611   6
   0  16  13-9.01263 69.7929   4
   0  16  13 63.2683 93.9639   2
   0 -16 -13 7.43072 92.2732   9
   0 -16 -14-174.340 132.976   6
   0  16  14-107.602 121.267   2
   0 -16 -14-113.150 119.289   9
   0 -16 -15 87.7448 134.115   9
   0 -16 -15 95.6573 117.227   6
   0  16  15 13.7722 130.516   2
   0 -16 -16 15.1645 105.065   9
   0  16  16 5.59570 120.830   2
   0  17 -14-130.003 129.021   4
   0  17 -13 498.758 185.362   4
   0  17 -12 291.677 130.666   4
   0  17 -11 369.953 174.580  10
   0  17 -11 386.961 160.976   4
   0  17 -10 65.9867 107.285   4
   0  17 -10-11.0326 110.236  10
   0  17  -9 408.166 163.282  10
   0  17  -9 29.5971 101.945   4
   0  17  -8-134.227 137.762   4
   0  17  -8 217.157 151.155  10
   0  17  -7 794.483 195.783   4
   0  17  -6 23.1683 89.7853   4
   0  17  -5 319.780 132.960   4
   0  17  -4 299.238 116.849   4
   0  17  -3 47.9310 67.4835   3
   0  17  -3-12.6417 86.2325   4
   0  17  -2 19.9025 69.4583   3
   0  17  -2 403.085 147.712   4
   0  17  -1 886.982 191.383   4
   0  17  -1 701.995 143.241   3
   0  17   0 946.063 166.865   3
   0 -17   0 1057.77 204.664   6
   0  17   0 1178.91 218.448   4
   0  17   1 1196.69 179.946   3
   0  17   1 1254.00 215.158   4
   0 -17  -1 693.705 186.799   6
   0 -17  -2 675.345 170.038   6
   0  17   2 842.776 165.600   3
   0  17   2 781.789 178.051   4
   0  17   3 320.029 107.732   3
   0 -17  -3 191.446 108.279   6
   0  17   3 349.293 137.235   4
   0  17   4 1596.07 227.356   3
   0 -17  -4 834.133 210.813   9
   0 -17  -4 717.924 177.432   6
   0  17   4 1128.65 205.159   4
   0  17   5 365.636 130.952   4
   0  17   5 281.536 106.388   3
   0 -17  -5 237.923 131.919   9
   0 -17  -5 309.600 129.873   6
   0  17   6 609.452 157.836   4
   0 -17  -6 431.996 156.665   9
   0  17   6 387.887 140.927   2
   0 -17  -6 572.268 164.080   6
   0  17   6 254.340 120.727   3
   0 -17  -7 127.397 109.219   9
   0  17   7 311.763 116.046   3
   0 -17  -7 58.3160 99.9228   6
   0  17   7 322.593 140.836   2
   0  17   7 265.842 116.820   4
   0 -17  -8 359.877 148.073   6
   0  17   8 363.984 113.383   4
   0  17   8 322.146 129.411   2
   0 -17  -8 251.390 133.864   9
   0  17   8 294.754 115.746   3
   0  17   9 313.604 124.054   3
   0  17   9 325.597 113.038   2
   0  17   9 502.287 138.829   4
   0 -17  -9 255.968 148.674   6
   0 -17  -9 371.177 160.404   9
   0  17  10 46.6395 107.421   2
   0  17  10-145.453 109.016   3
   0 -17 -10 72.3209 120.888   9
   0  17  10-54.9885 79.0329   4
   0 -17 -10 192.156 117.753   6
   0 -17 -11 356.881 148.790   9
   0 -17 -11 639.328 187.357   6
   0  17  11 655.668 170.415   3
   0  17  11 645.691 157.156   4
   0  17  11 711.268 202.620   2
   0  17  12-93.6373 129.716   3
   0  17  12 68.2015 121.255   2
   0  17  12-66.5234 95.2696   4
   0 -17 -12 232.783 139.783   9
   0 -17 -12 150.666 149.480   6
   0  17  13 578.000 204.663   2
   0 -17 -13 615.729 200.977   9
   0 -17 -13 339.152 164.810   6
   0  17  13 407.058 123.871   4
   0  17  14 11.4849 98.9531   2
   0 -17 -14 129.660 119.481   9
   0  18 -10 106.816 91.4819   4
   0  18  -9 183.580 158.276  10
   0  18  -9-146.736 127.678   4
   0  18  -8-112.341 119.432  10
   0  18  -8-34.2647 116.269   4
   0  18  -7-135.749 124.449   4
   0  18  -6 5.59174 102.760   4
   0  18  -5 0.11313 87.1795   4
   0  18  -4 441.487 142.392   4
   0  18  -3 352.137 150.565   4
   0  18  -2 305.003 141.234   4
   0  18  -1 1582.68 252.344   4
   0  18   0 260.347 144.312   4
   0  18   1 956.364 192.361   4
   0 -18  -1 748.812 182.359   6
   0 -18  -2 82.1525 83.4195   6
   0  18   2 222.504 122.660   4
   0 -18  -3 443.748 173.828   9
   0  18   3 441.513 145.465   4
   0  18   3 633.940 155.283   3
   0 -18  -3 601.487 166.394   6
   0  18   4 28.4096 89.3230   4
   0 -18  -4 117.616 94.7122   9
   0  18   4 120.016 79.5233   3
   0 -18  -4 52.3330 79.0517   6
   0  18   5 425.545 148.652   4
   0 -18  -5 468.810 164.451   9
   0  18   5 423.485 138.029   3
   0 -18  -5 38.9944 75.5621   6
   0  18   6 282.713 112.477   4
   0 -18  -6 501.200 160.062   6
   0  18   6 394.732 131.501   3
   0 -18  -6 484.634 168.919   9
   0 -18  -7 220.349 130.024   6
   0  18   7 9.58103 92.2732   3
   0  18   7-47.3216 89.5685   4
   0 -18  -7-60.6959 114.590   9
   0  18   7 203.993 127.114   2
   0  18   8 186.168 115.495   3
   0  18   8 3.11957 108.942   2
   0 -18  -8 57.3163 83.4933   6
   0  18   8 71.0224 85.9441   4
   0 -18  -8-34.9690 101.900   9
   0 -18  -9 408.600 169.289   6
   0  18   9 237.459 101.948   4
   0 -18  -9 208.403 147.481   9
   0  18   9 130.174 128.788   2
   0  18   9 359.374 144.312   3
   0 -18 -10 790.708 207.053   6
   0  18  10 538.502 171.270   2
   0  18  10 632.375 176.149   3
   0 -18 -10 375.411 158.021   9
   0  18  10 571.233 165.450   4
   0  18  11 160.296 154.419   2
   0  18  11 124.766 84.7054   4
   0 -18 -11 299.104 166.340   6
   0 -18 -11-11.9723 97.8567   9
   0  18  11 119.381 89.3175   3
   0  18  12 687.981 210.887   2
   0  18  12 839.281 210.527   3
   0  18  12 549.880 158.419   4
   0 -18 -12 864.361 230.823   9
   0  18  13 355.023 164.481   3
   0  18  14 876.579 218.613   3
   0  19  -8 90.4827 121.358  10
   0  19  -7 299.330 164.656  10
   0  19  -5 109.277 108.105   4
   0  19  -4 14.0720 87.2452   4
   0  19  -3 140.302 103.142   4
   0  19  -2 521.526 176.428   4
   0  19  -1 311.375 139.693   4
   0  19   0 2175.47 305.043   4
   0 -19  -1-72.2307 93.8119   6
   0  19   1 102.034 86.0203   4
   0  19   2 280.039 122.911   4
   0 -19  -2 502.754 144.936   6
   0  19   3 81.1914 116.220   4
   0 -19  -3-48.9696 92.4543   9
   0 -19  -3 8.11088 85.3143   6
   0 -19  -4 181.649 117.041   9
   0  19   4 541.146 165.989   4
   0 -19  -4 442.408 157.760   6
   0  19   5 69.1059 93.1906   4
   0 -19  -5 105.774 101.867   6
   0 -19  -5-164.443 124.531   9
   0 -19  -6-188.230 140.202   6
   0  19   6 107.327 107.901   4
   0 -19  -6-55.0474 110.922   9
   0 -19  -7 136.345 113.528   6
   0 -19  -7-17.5026 104.780   9
   0  19   7 139.260 99.6841   4
   0  19   8 193.523 107.688   4
   0  19   8-112.878 139.227   2
   0 -19  -8 25.4741 88.0308   6
   0 -19  -8-6.34731 97.8490   9
   0  19   9 113.319 94.4133   4
   0  19   9 114.093 111.306   2
   0 -19  -9 377.186 162.969   6
   0  19  10 374.852 170.497   2
   0  19  10 334.260 145.975   4
   0  19  11 952.242 216.728   4
   0  19  12 32.1491 76.6349   4
   0 -20  -2 277.690 150.060   6
   0 -20  -3 462.392 163.261   6
   0 -20  -4 17.2314 90.1947   6
   0 -20  -5 136.813 92.9416   6
   0  20   6 228.997 123.593   4
   0 -20  -6 130.587 123.999   6
   0  20   7 380.706 151.685   4
   0  20   8 271.525 141.299   4
   0  20   9 103.592 118.991   4
   0  20  10 124.673 108.828   4
   0  20  11 127.379 123.763   4
   1 -20  -4 720.602 200.240   6
   1 -20  -3 343.223 171.501   6
   1 -20  -2 1197.24 263.755   6
  -1  20  -5 1401.92 292.942  10
  -1  19  12 101.070 93.0645   4
  -1  19  11 122.884 97.0786   4
  -1  19  10-95.7247 107.427   4
  -1  19   9-22.5799 90.1557   4
   1 -19  -8 259.350 137.999   6
  -1  19   8 92.1253 80.0319   4
   1 -19  -7 5.02101 86.9372   6
  -1  19   7-50.2055 82.8931   4
  -1  19   6 148.385 117.629   4
   1 -19  -6 14.8748 96.7635   9
   1 -19  -6-7.23678 97.1379   6
   1 -19  -5 421.871 172.686   9
   1 -19  -5 328.045 147.736   6
  -1  19   5 283.620 125.689   4
   1 -19  -4 510.598 158.998   6
  -1  19   4 573.904 169.174   4
   1 -19  -4 967.394 235.503   9
  -1  19   3 939.696 215.267   4
   1 -19  -3 497.736 167.118   6
   1 -19  -3 488.803 184.938   9
  -1  19   2 1323.33 258.883   4
   1 -19  -2 867.133 207.068   6
  -1  19   1 601.629 188.521   4
   1 -19  -1 811.686 198.746   6
  -1  19   0 479.511 163.372   4
  -1  19  -1 549.565 190.631   4
  -1  19  -6 85.7064 101.042  10
  -1  19  -7-194.713 141.987  10
  -1  18  12 1227.19 224.512   4
  -1  18  11 50.3422 107.275   4
  -1  18  11-19.1607 121.458   2
  -1  18  10 126.760 83.4551   4
   1 -18 -10 29.7036 99.0927   6
   1 -18 -10-232.034 146.240   9
  -1  18  10 72.7818 91.9904   2
   1 -18  -9-109.123 126.934   9
  -1  18   9 66.5100 85.6985   4
  -1  18   9 11.1443 98.1165   2
   1 -18  -9 312.258 149.824   6
   1 -18  -8 405.700 183.623   6
  -1  18   8 279.684 139.512   2
  -1  18   8 355.197 140.277   4
   1 -18  -8 303.646 147.628   9
   1 -18  -7 107.409 115.870   9
  -1  18   7 221.932 120.299   4
   1 -18  -7 183.959 129.366   6
   1 -18  -6 293.085 146.565   9
  -1  18   6 446.872 153.894   4
   1 -18  -6 260.838 126.148   6
  -1  18   5 292.229 132.676   4
   1 -18  -5 29.4040 83.1006   6
   1 -18  -5-10.7424 103.048   9
  -1  18   4 452.087 156.197   4
   1 -18  -4 193.088 140.463   9
   1 -18  -4 359.292 150.414   6
   1 -18  -3 1477.08 267.203   9
  -1  18   3 1696.77 275.955   4
   1 -18  -3 1270.38 240.938   6
   1 -18  -2 209.781 128.592   6
  -1  18   2 52.2163 93.1943   4
   1 -18  -1 2157.19 297.893   6
  -1  18   1 2147.61 302.357   4
  -1  18   0 582.117 170.989   4
  -1  18  -1 614.987 176.276   4
  -1  18  -2 421.847 163.491   4
  -1  18  -3 249.848 130.064   4
  -1  18  -4 155.659 101.155   4
  -1  18  -5 454.611 165.202   4
  -1  18  -6 43.7319 93.3399  10
  -1  18  -6 98.1548 112.476   4
  -1  18  -7 465.011 176.550  10
  -1  18  -7 376.095 145.709   4
  -1  18  -8 140.119 106.444   4
  -1  18  -8 249.728 131.763  10
  -1  18  -9 126.413 116.327  10
  -1  17  13 1231.75 281.574   2
   1 -17 -13 2138.70 351.741   9
  -1  17  13 1570.17 271.337   3
   1 -17 -12 252.527 133.546   9
  -1  17  12 615.373 168.089   3
   1 -17 -12 565.171 190.528   6
  -1  17  12 349.098 131.717   4
  -1  17  12 477.175 168.714   2
   1 -17 -11 240.109 141.111   9
   1 -17 -11 327.197 133.774   6
  -1  17  11 359.023 129.186   4
  -1  17  11 240.004 112.730   3
  -1  17  11 305.512 155.358   2
  -1  17  10 78.5348 73.0988   4
   1 -17 -10 240.844 137.745   9
   1 -17 -10-14.4283 90.6625   6
  -1  17  10 196.610 110.255   3
  -1  17  10-52.7355 103.644   2
   1 -17  -9 190.342 97.9393   6
  -1  17   9 98.3834 93.2532   2
   1 -17  -9 342.359 171.215   9
  -1  17   9 141.841 111.852   3
  -1  17   9 104.235 81.8135   4
  -1  17   8-108.511 109.121   2
   1 -17  -8-48.1803 98.6759   6
  -1  17   8-72.4341 81.2894   4
  -1  17   8-109.931 107.525   3
  -1  17   7 1348.41 261.774   2
   1 -17  -7 1251.64 236.194   6
  -1  17   7 1400.99 225.645   4
  -1  17   7 1347.95 213.842   3
   1 -17  -7 1290.85 254.342   9
  -1  17   6-87.9626 84.1892   3
   1 -17  -6-10.1521 92.2192   9
   1 -17  -6 225.012 139.892   6
  -1  17   6 35.1022 81.7238   4
   1 -17  -5 798.118 196.305   6
  -1  17   5 1032.33 185.245   3
  -1  17   5 1210.19 211.786   4
   1 -17  -5 1011.88 225.974   9
   1 -17  -4 1002.05 225.946   9
  -1  17   4 1436.94 210.360   3
   1 -17  -4 1160.53 235.114   6
  -1  17   4 1640.33 251.393   4
   1 -17  -3 82.9151 84.6782   6
  -1  17   3-38.6473 96.2968   4
  -1  17   2 2616.37 310.695   4
   1 -17  -2 1898.10 277.012   6
  -1  17   1 603.297 168.559   4
   1 -17  -1 286.488 153.356   6
  -1  17   0 1319.97 229.599   4
   1 -17   0 882.924 185.237   6
  -1  17  -1 179.796 123.979   4
  -1  17  -2 155.524 105.562   4
  -1  17  -3 274.490 135.306   4
  -1  17  -4 524.816 159.995   4
  -1  17  -5-82.1303 106.393   4
  -1  17  -6 1209.24 240.125   4
  -1  17  -7 390.164 173.524  10
  -1  17  -7 171.621 120.787   4
  -1  17  -8-10.1870 110.774  10
  -1  17  -8-172.253 151.368   4
  -1  17  -9 318.481 136.146   4
  -1  17  -9 582.389 196.233  10
  -1  17 -10 188.564 136.718  10
  -1  17 -10 97.7744 112.319   4
  -1  17 -11 329.731 157.290  10
  -1  17 -11 537.003 191.581   4
  -1  17 -12-60.9894 123.663   4
  -1  16  15 55.0812 118.097   2
   1 -16 -15 478.919 206.726   9
   1 -16 -14 484.240 181.600   9
  -1  16  14 231.660 160.043   2
   1 -16 -14 122.338 144.159   6
  -1  16  13 668.639 213.735   2
   1 -16 -13 434.433 162.357   6
  -1  16  13 501.703 127.945   4
   1 -16 -13 434.890 173.667   9
   1 -16 -12 201.530 128.112   9
  -1  16  12 155.976 84.7886   4
   1 -16 -12-38.2849 102.156   6
  -1  16  12 61.8186 124.949   2
  -1  16  11 332.850 126.174   4
  -1  16  11 463.120 172.293   2
  -1  16  11-26.8222 112.164   3
   1 -16 -11 235.158 139.756   6
   1 -16 -11 151.299 104.808   9
  -1  16  10-158.915 115.981   3
   1 -16 -10 91.9638 96.2065   6
   1 -16 -10 88.8528 113.228   9
  -1  16  10-66.3996 80.1447   4
  -1  16  10-38.6642 100.028   2
   1 -16  -9 620.520 151.411   6
  -1  16   9 1096.68 231.167   2
   1 -16  -9 985.842 239.600   9
  -1  16   9 893.654 191.061   3
  -1  16   9 1050.27 196.965   4
  -1  16   8 1372.89 211.948   4
  -1  16   8 1255.21 246.240   2
   1 -16  -8 1327.32 251.883   9
  -1  16   8 1593.61 231.834   3
   1 -16  -8 1423.75 248.533   6
   1 -16  -7 480.183 161.516   9
  -1  16   7 454.803 140.916   4
   1 -16  -7 435.521 156.417   6
  -1  16   7 339.894 161.342   2
  -1  16   7 76.8230 88.2719   3
  -1  16   6 1715.62 280.597   2
  -1  16   6 2044.50 260.033   4
   1 -16  -6 1785.81 278.542   9
   1 -16  -6 2517.33 316.646   6
  -1  16   6 1797.31 235.545   3
  -1  16   5 1395.49 224.853   4
   1 -16  -5 747.912 193.627   9
  -1  16   5 1171.15 198.383   3
   1 -16  -5 1151.58 221.954   6
  -1  16   4 35.2641 70.3320   3
   1 -16  -4-63.8466 100.024   9
   1 -16  -4 162.573 107.162   6
  -1  16   4 196.754 107.968   4
   1 -16  -3 1192.15 204.918   6
  -1  16   3 1543.04 199.852   3
  -1  16   3 1506.32 231.400   4
  -1  16   2 1526.03 208.211   3
  -1  16   2 1336.22 227.316   4
   1 -16  -2 1423.36 234.862   6
   1 -16  -1 174.119 107.865   6
  -1  16   1 209.024 88.1494   3
  -1  16   1 535.117 162.068   4
  -1  16   0 518.654 125.742   3
   1 -16   0 305.442 119.172   6
  -1  16   0 483.372 154.668   4
  -1  16  -1 120.222 94.8866   4
  -1  16  -1-99.8943 88.2791   3
  -1  16  -2 407.469 157.101   4
  -1  16  -2 293.657 94.1893   3
  -1  16  -3 694.802 174.079   4
  -1  16  -3 622.881 125.738   3
  -1  16  -4 119.165 100.769   4
  -1  16  -5 1356.91 229.777   4
   1 -16   5 1357.44 172.988   1
  -1  16  -6 553.091 172.359   4
   1 -16   6 503.653 119.555   1
   1 -16   7 111.662 61.6350   1
  -1  16  -7 69.8596 94.3701  10
  -1  16  -7 37.6296 95.8199   4
  -1  16  -8 925.050 203.279   4
  -1  16  -8 830.201 198.781  10
   1 -16   8 874.670 158.865   1
   1 -16   9 59.7484 82.5344   1
  -1  16  -9 37.7972 98.0024  10
  -1  16  -9 58.7837 94.7774   4
  -1  16 -10 3.07356 102.379   4
  -1  16 -10 237.321 146.060  10
   1 -16  10 115.308 83.4525   1
   1 -16  11 257.142 105.797   1
  -1  16 -11 440.878 183.934  10
  -1  16 -11 45.8343 115.817   4
   1 -16  12 214.238 106.939   1
  -1  16 -12 166.361 115.351  10
  -1  16 -12 231.273 126.164   4
   1 -16  13 105.601 91.8296   1
  -1  16 -13-18.1654 110.493   4
   1 -16  14 10.0321 83.0130   1
  -1  16 -14 45.9244 93.6165   4
   1 -16  15-30.4181 84.0955   1
  -1  16 -15-105.563 128.181   4
  -1  16 -16 426.830 163.595   4
   1 -15 -17 226.948 164.524   9
   1 -15 -16 62.2330 94.3991   6
   1 -15 -16 72.2282 106.940   9
  -1  15  16-36.7361 116.919   2
   1 -15 -15 213.964 127.618   6
  -1  15  15-59.0807 133.286   2
   1 -15 -15 316.877 156.358   9
  -1  15  14 290.931 129.743   2
   1 -15 -14 328.651 143.661   6
   1 -15 -14 592.516 205.841   9
  -1  15  13 60.5828 104.378   2
   1 -15 -13 7.54359 95.7322   9
   1 -15 -13 271.493 149.727   6
  -1  15  13 48.5879 75.6604   4
   1 -15 -12 592.235 181.475   9
  -1  15  12 571.615 132.221   4
  -1  15  12 421.393 161.774   2
   1 -15 -12 248.283 103.063   6
  -1  15  11 105.445 97.6288   2
  -1  15  11 181.863 98.0119   4
   1 -15 -11-6.01393 99.1738   9
   1 -15 -11 196.156 119.925   6
  -1  15  10 1306.90 199.166   4
   1 -15 -10 850.790 217.132   9
   1 -15 -10 985.980 210.447   6
  -1  15  10 1428.79 263.948   2
  -1  15   9 373.265 135.106   3
  -1  15   9 331.391 118.210   4
   1 -15  -9 273.796 143.086   9
  -1  15   9 407.016 164.205   2
   1 -15  -9 57.6678 87.9745   6
  -1  15   8 3880.32 337.526   4
  -1  15   8 4347.00 421.133   2
  -1  15   8 4222.14 368.227   3
   1 -15  -8 3870.04 404.855   6
   1 -15  -8 4188.16 415.843   9
   1 -15  -7 602.737 180.267   9
  -1  15   7 555.891 175.517   2
  -1  15   7 671.375 149.305   3
  -1  15   7 640.807 159.562   4
   1 -15  -7 523.201 168.779   6
  -1  15   6 2509.16 316.547   2
   1 -15  -6 2740.67 328.590   6
  -1  15   6 2409.55 264.559   4
   1 -15  -6 1948.77 284.508   9
  -1  15   6 1792.97 226.307   3
   1 -15  -5 52.4336 120.478   9
  -1  15   5-37.5422 72.0162   3
   1 -15  -5 66.1514 99.6845   6
  -1  15   5 148.224 92.3007   4
  -1  15   5-44.8673 104.114   2
  -1  15   4 690.866 141.800   3
   1 -15  -4 608.892 167.947   9
  -1  15   4 593.009 142.999   4
   1 -15  -4 762.093 181.028   6
  -1  15   3 2558.23 282.175   4
  -1  15   3 3000.11 274.393   3
   1 -15  -3 2546.79 297.374   6
   1 -15  -2 330.079 117.489   6
  -1  15   2 181.126 92.0926   3
  -1  15   2 449.682 137.175   4
   1 -15  -1 1567.81 236.795   6
   1 -15  -1 1901.21 165.783   1
  -1  15   1 2057.83 215.372   3
  -1  15   1 1660.76 237.878   4
  -1  15   0 380.147 128.433   4
   1 -15   0 302.590 102.221   6
   1 -15   0 432.402 92.6161   1
  -1  15   0 535.872 124.866   3
  -1  15  -1 27.8733 58.7877   3
  -1  15  -1 128.196 102.290   4
   1 -15   1-3.31114 42.3237   1
  -1  15  -2 62.3460 66.6249   3
  -1  15  -2 197.668 89.6720   4
   1 -15   2 182.180 67.1188   1
  -1  15  -3 1811.99 254.447   4
   1 -15   3 1782.34 182.475   1
  -1  15  -3 1850.41 207.375   3
   1 -15   4 399.034 101.002   1
  -1  15  -4 456.496 108.367   3
  -1  15  -4 626.743 160.654   4
  -1  15  -5 2196.35 223.552   3
   1 -15   5 2033.43 205.152   1
  -1  15  -5 2161.59 279.699   4
  -1  15  -6 661.353 138.927   3
  -1  15  -6 786.474 184.346   4
   1 -15   6 743.701 131.699   1
   1 -15   7 956.669 160.509   1
  -1  15  -7 834.906 191.180   4
  -1  15  -7 1019.12 169.590   3
  -1  15  -8-70.4245 123.230  10
   1 -15   8 137.062 78.6013   1
  -1  15  -9-175.459 124.114  10
   1 -15   9-74.7139 71.5004   1
  -1  15  -9-250.481 133.670   4
  -1  15 -10-72.0446 104.175   4
   1 -15  10-7.94060 81.6968   1
  -1  15 -10 99.0553 118.295  10
  -1  15 -11 245.520 142.665  10
   1 -15  11 5.49947 61.3216   1
  -1  15 -11 98.5136 86.2137   4
  -1  15 -12 255.182 136.989   4
   1 -15  12 451.519 139.716   1
  -1  15 -12 545.324 196.834  10
   1 -15  13 58.2911 100.913   1
  -1  15 -13 174.055 146.119   4
  -1  15 -13 92.0613 124.411  10
  -1  15 -14-103.597 101.217   4
   1 -15  14 72.1963 87.9572   1
   1 -15  15 404.916 146.999   1
  -1  15 -15-212.103 155.025   4
   1 -15  16 157.742 116.144   1
  -1  15 -16 278.212 142.984   4
   1 -14 -18 141.170 138.505   9
   1 -14 -17 453.486 159.771   6
   1 -14 -17 312.477 153.040   9
  -1  14  17 117.235 94.9909   2
   1 -14 -16 231.422 114.213   6
  -1  14  16 104.669 98.7801   2
   1 -14 -16 139.939 100.728   9
   1 -14 -15 673.286 204.756   9
  -1  14  15 337.348 144.684   2
   1 -14 -15 498.363 187.461   6
  -1  14  14 800.974 216.912   2
   1 -14 -14 1017.21 229.030   9
   1 -14 -14 859.543 205.112   6
  -1  14  13 211.632 83.3592   4
  -1  14  13-50.2659 100.417   2
   1 -14 -13-41.7471 79.2022   6
   1 -14 -13 191.913 161.339   9
  -1  14  12 706.412 140.258   4
   1 -14 -12 784.957 203.241   9
   1 -14 -12 653.854 181.070   6
  -1  14  12 720.250 188.115   2
   1 -14 -11 280.026 120.608   6
   1 -14 -11 574.101 152.769   9
  -1  14  11 373.598 132.715   2
  -1  14  11 778.595 151.004   4
  -1  14  10 121.399 74.6260   4
   1 -14 -10 69.9435 83.5159   6
   1 -14 -10-21.8735 111.108   9
  -1  14  10 117.166 83.2563   2
   1 -14  -9 729.629 187.761   9
  -1  14   9 680.695 144.798   4
  -1  14   9 1055.70 214.006   2
   1 -14  -9 744.876 181.189   6
   1 -14  -8 42.0348 82.3031   6
  -1  14   8 211.870 96.0344   3
  -1  14   8 78.1253 90.2782   2
   1 -14  -8 40.9374 101.172   9
  -1  14   8 101.269 87.4167   4
   1 -14  -7 1925.55 265.575   6
   1 -14  -7 2144.53 282.205   9
  -1  14   7 2670.55 318.416   2
  -1  14   7 2208.84 250.864   3
  -1  14   7 2219.47 248.678   4
  -1  14   6 131.173 109.741   2
  -1  14   6 489.678 126.951   4
   1 -14  -6 273.779 112.466   6
   1 -14  -6 160.609 118.647   9
  -1  14   6 135.374 82.8969   3
   1 -14  -5 1376.65 215.509   6
  -1  14   5 1154.01 177.634   4
   1 -14  -5 1289.53 224.444   9
  -1  14   5 1055.62 172.736   3
  -1  14   5 1224.22 226.867   2
  -1  14   4 753.422 150.690   4
  -1  14   4 765.664 175.284   2
   1 -14  -4 1045.30 199.287   6
   1 -14  -4 581.699 154.901   9
  -1  14   4 1041.84 170.838   3
  -1  14   3 197.449 87.5132   3
   1 -14  -3 405.358 137.598   6
  -1  14   3 145.773 77.0329   4
  -1  14   2-48.0931 73.9198   3
  -1  14   2 46.0611 77.1841   4
   1 -14  -2-126.280 109.894   6
   1 -14  -2 125.572 53.4038   1
  -1  14   1 3938.73 296.212   3
   1 -14  -1 3653.34 228.675   1
   1 -14  -1 3150.04 317.054   6
  -1  14   1 3674.87 323.423   4
   1 -14   0 213.363 100.254   6
  -1  14   0 267.736 107.170   3
  -1  14   0 35.3605 69.8820   4
   1 -14   0 247.204 86.1368   1
  -1  14  -1 2740.36 284.654   4
   1 -14   1 2478.95 276.458   6
   1 -14   1 2455.82 197.382   1
  -1  14  -1 2791.09 242.229   3
   1 -14   2 224.857 55.1226   8
  -1  14  -2 156.182 102.332   4
   1 -14   2 129.219 76.1749   1
  -1  14  -2 64.9721 68.5357   3
   1 -14   3 76.8386 56.2426   1
  -1  14  -3 47.6388 74.9236   4
  -1  14  -3-85.4813 80.5297   3
   1 -14   3-13.7787 35.4106   8
  -1  14  -4 3923.27 355.734   4
   1 -14   4 4607.13 247.492   8
  -1  14  -4 4212.12 306.954   3
   1 -14   4 3903.48 276.931   1
  -1  14  -5 598.283 162.103   4
  -1  14  -5 339.511 108.065   3
   1 -14   5 469.535 113.740   1
  -1  14  -6 7771.78 517.384   4
   1 -14   6 7042.69 407.379   1
  -1  14  -6 7389.34 425.090   3
  -1  14  -7 130.588 97.0746   4
  -1  14  -7 237.199 92.5841   3
   1 -14   7 437.507 117.834   1
  -1  14  -8-120.949 98.5661   4
  -1  14  -8-40.4727 98.4581  10
   1 -14   8 35.6589 67.6756   1
  -1  14  -9 11.1705 132.347  10
  -1  14  -9 19.1411 103.048   4
   1 -14   9 83.6747 70.7096   1
   1 -14  10 1358.88 199.524   1
  -1  14 -10 1014.44 207.345   4
  -1  14 -10 1332.54 246.834  10
  -1  14 -11 92.3311 99.7378  10
  -1  14 -11 3.28368 82.5856   4
   1 -14  11-41.9670 62.3505   1
  -1  14 -12 1262.41 237.182   4
  -1  14 -12 1213.18 256.242  10
   1 -14  12 1663.39 228.778   1
  -1  14 -13 66.3859 112.062  10
  -1  14 -13-7.89973 105.116   4
   1 -14  13 66.4308 77.0184   1
  -1  14 -14 24.8884 105.552  10
   1 -14  14 111.492 98.4239   1
  -1  14 -14-111.952 117.918   4
   1 -14  15 3.64208 69.1345   1
  -1  14 -15 167.273 89.0239   4
  -1  14 -15-13.1397 121.823  10
  -1  14 -16-26.2063 102.508   4
   1 -14  16 15.9497 78.9653   1
   1 -14  17 1217.22 238.124   1
   1 -13 -19 274.833 154.659   9
   1 -13 -19 97.9625 89.1349   6
  -1  13  18-125.594 158.293   2
   1 -13 -18 282.887 179.423   9
   1 -13 -18 119.627 99.6306   6
   1 -13 -17 167.116 118.098   9
   1 -13 -17 54.0886 102.881   6
  -1  13  17 227.889 119.397   2
   1 -13 -16 136.978 128.051   6
   1 -13 -16 210.126 117.875   9
  -1  13  16 242.073 145.773   2
   1 -13 -15-51.3037 119.127   9
   1 -13 -15-69.9150 105.271   6
  -1  13  15 153.253 118.884   2
   1 -13 -14 954.422 210.119   6
   1 -13 -14 1138.12 242.711   9
  -1  13  14 1189.55 245.945   2
   1 -13 -13 1414.22 254.016   9
  -1  13  13 1441.82 182.114   4
  -1  13  13 2018.62 302.535   2
   1 -13 -13 1421.97 256.405   6
  -1  13  12 3754.86 308.624   4
  -1  13  12 4259.65 416.702   2
   1 -13 -12 4304.19 411.414   6
   1 -13 -12 3787.03 406.086   9
  -1  13  11 679.812 181.015   2
   1 -13 -11 738.564 172.775   6
   1 -13 -11 834.813 202.867   9
  -1  13  11 672.587 136.527   4
   1 -13 -10 205.721 126.602   9
  -1  13  10 209.304 92.0667   4
   1 -13 -10 160.466 106.302   6
  -1  13  10 78.6780 83.5910   2
   1 -13  -9 643.184 166.065   6
   1 -13  -9 491.520 151.336   9
  -1  13   9 906.286 159.510   4
  -1  13   9 882.868 195.517   2
  -1  13   8-137.533 119.677   2
   1 -13  -8-145.429 104.704   9
   1 -13  -8-31.1763 75.5751   6
  -1  13   8 23.1171 58.1215   4
  -1  13   7 2477.32 303.091   2
   1 -13  -7 1931.20 261.414   6
  -1  13   7 2089.21 235.717   3
   1 -13  -7 2161.21 283.058   9
  -1  13   7 2250.35 235.902   4
   1 -13  -6 400.061 143.605   6
   1 -13  -6 516.165 154.489   9
  -1  13   6 401.270 129.777   2
  -1  13   6 379.042 100.443   4
  -1  13   6 382.008 102.441   3
  -1  13   5 1207.29 207.776   2
  -1  13   5 1178.45 179.254   4
   1 -13  -5 1144.42 199.458   9
  -1  13   5 1168.41 169.405   3
   1 -13  -5 797.226 167.027   6
   1 -13  -4 66.2684 78.1611   6
  -1  13   4 228.097 101.204   4
  -1  13   4 4.54137 64.8548   3
  -1  13   4 125.623 80.1120   2
  -1  13   3 1692.65 210.536   4
  -1  13   3 1932.17 207.318   3
   1 -13  -3 1575.28 220.910   6
   1 -13  -2 1216.70 194.523   6
  -1  13   2 1601.77 184.264   3
   1 -13  -2 1226.80 85.8498   8
  -1  13   2 1189.48 178.764   4
   1 -13  -1 6318.91 437.338   6
   1 -13  -1 7193.87 323.862   1
  -1  13   1 7550.12 455.239   4
   1 -13  -1 7503.43 252.822   8
  -1  13   1 7205.76 392.904   3
   1 -13   0 4151.52 187.498   8
   1 -13   0 3962.61 247.490   1
   1 -13   0 3380.51 313.707   6
  -1  13   0 4077.07 337.645   4
  -1  13   0 3822.91 281.533   3
  -1  13  -1 1724.85 222.255   4
  -1  13  -1 1604.08 176.393   3
   1 -13   1 1642.24 118.565   8
   1 -13   1 1418.36 152.911   1
   1 -13   1 1375.77 202.903   6
   1 -13   2 770.454 87.4953   8
  -1  13  -2 313.120 62.8983   3
   1 -13   2 517.896 102.390   1
   1 -13   2 336.392 94.2022   6
  -1  13  -2 582.086 145.972   4
   1 -13   3-13.8429 41.6859   1
  -1  13  -3-53.0598 72.8694   3
   1 -13   3 63.1693 38.4961   8
  -1  13  -4 1848.98 235.019   4
   1 -13   4 1639.98 176.455   1
   1 -13   4 1901.04 156.571   8
  -1  13  -4 1744.72 192.052   3
  -1  13  -5 269.368 110.928   4
  -1  13  -5 132.530 61.2160   3
   1 -13   5 538.204 116.819   1
  -1  13  -6 4796.97 325.937   3
   1 -13   6 4780.17 318.802   1
  -1  13  -6 4955.77 391.504   4
  -1  13  -7 123.514 64.6605   3
   1 -13   7 221.215 104.653   1
  -1  13  -7 296.870 118.227   4
   1 -13   8 11.6089 59.7225   1
  -1  13  -8-7.52781 103.838  10
  -1  13  -8 212.550 112.709   4
  -1  13  -9 56.3639 78.1876   4
  -1  13  -9 71.7985 91.8400  10
   1 -13   9 185.238 68.6831   1
  -1  13 -10 2058.98 272.856   4
  -1  13 -10 2461.96 334.620  10
   1 -13  10 2161.42 246.848   1
  -1  13 -11 861.383 191.193   4
   1 -13  11 951.633 169.641   1
  -1  13 -11 995.442 215.309  10
   1 -13  12 1256.60 199.924   1
  -1  13 -12 1019.20 230.589  10
  -1  13 -12 991.446 187.767   4
  -1  13 -13 865.455 225.540  10
  -1  13 -13 800.704 173.102   4
   1 -13  13 843.769 167.089   1
  -1  13 -14 178.612 100.891   4
   1 -13  14 292.110 127.245   1
  -1  13 -14 65.9692 106.696  10
  -1  13 -15-76.9492 116.819   4
  -1  13 -15-22.1868 110.405  10
   1 -13  15 101.206 91.1847   1
  -1  13 -16 102.350 104.667  10
  -1  13 -16 48.3232 94.6288   4
   1 -13  16 213.884 123.949   1
   1 -13  17 1156.69 229.144   1
   1 -12 -20-204.619 129.961   9
   1 -12 -20 215.138 158.933   6
   1 -12 -19 128.391 125.467   6
   1 -12 -19 61.5833 165.008   9
  -1  12  19 81.7427 117.722   2
  -1  12  18-196.116 166.260   2
   1 -12 -18 208.510 137.011   9
   1 -12 -18-92.2482 107.561   6
   1 -12 -17-35.6990 100.796   9
  -1  12  17-204.215 148.885   2
   1 -12 -17-47.2974 113.137   6
   1 -12 -16 92.0250 114.422   9
   1 -12 -16 50.6406 115.020   6
  -1  12  16 27.3205 113.696   2
   1 -12 -15-97.8130 119.444   9
   1 -12 -15-73.8918 108.282   6
  -1  12  15 18.9480 89.7830   2
  -1  12  14 6.46299 50.5145   4
   1 -12 -14 22.2371 83.0219   6
  -1  12  14 44.9125 92.5672   2
   1 -12 -14 97.8214 117.550   9
  -1  12  13 3620.86 386.038   2
  -1  12  13 2835.48 256.184   4
   1 -12 -13 3208.75 367.776   9
   1 -12 -13 3214.69 357.375   6
  -1  12  12 293.690 132.597   2
   1 -12 -12 437.540 160.978   9
   1 -12 -12 390.575 134.742   6
  -1  12  12 238.753 80.7937   4
   1 -12 -11 5605.61 443.326   6
   1 -12 -11 5600.80 467.103   9
  -1  12  11 5049.07 341.467   4
  -1  12  11 5562.32 458.546   2
  -1  12  10 619.517 121.372   4
   1 -12 -10 324.312 110.648   9
   1 -12 -10 662.473 158.636   6
  -1  12  10 500.016 156.613   2
  -1  12   9 11.1960 53.9992   4
   1 -12  -9-33.8479 85.4423   6
  -1  12   9-126.554 114.088   2
   1 -12  -9 70.2176 92.5851   9
   1 -12  -8 78.2864 80.7869   9
  -1  12   8 50.0992 82.9378   2
  -1  12   8 118.150 71.3439   4
   1 -12  -8 139.672 84.6638   6
   1 -12  -8 33.5066 35.9190   1
   1 -12  -7 223.958 100.815   9
  -1  12   7 218.340 107.809   2
   1 -12  -7 257.646 105.666   6
  -1  12   7 329.413 95.8278   4
   1 -12  -7 299.478 63.3889   1
  -1  12   6 292.982 119.382   2
   1 -12  -6 365.253 64.7905   1
  -1  12   6 370.003 102.143   4
  -1  12   6 84.1940 63.0303   3
   1 -12  -6 385.397 128.534   6
   1 -12  -6 282.882 112.618   9
  -1  12   5 1632.71 225.307   2
  -1  12   5 1515.87 181.656   3
   1 -12  -5 1227.20 118.130   1
   1 -12  -5 1319.60 210.082   9
   1 -12  -5 998.303 172.975   6
  -1  12   5 1429.64 184.403   4
  -1  12   4 50.3045 91.4001   2
   1 -12  -4-5.29655 33.0269   1
  -1  12   4-114.882 89.6273   3
  -1  12   4 29.1856 79.2484   4
   1 -12  -4 8.68847 63.1083   6
  -1  12   3 162.637 89.9172   4
  -1  12   3 102.882 78.1427   3
  -1  12   3 209.730 102.993   2
   1 -12  -3 97.7235 63.1242   6
  -1  12   2 4838.64 343.470   4
   1 -12  -2 5152.33 191.462   8
  -1  12   2 5715.16 335.563   3
   1 -12  -2 4995.31 364.564   6
   1 -12  -1 223.283 39.3492   8
  -1  12   1 510.863 108.658   3
  -1  12   1 551.377 126.644   4
   1 -12  -1 499.066 123.703   6
   1 -12   0 7842.84 349.257   1
  -1  12   0 8225.83 408.634   3
   1 -12   0 7186.99 456.263   6
   1 -12   0 9862.40 303.122   8
  -1  12   0 8208.99 463.644   4
  -1  12  -1 148.475 88.3276   3
   1 -12   1 205.298 51.7255   8
  -1  12  -1 270.062 96.5737   4
   1 -12   1 320.466 93.6635   1
   1 -12   1-19.3198 83.3193   6
   1 -12   2 1387.41 113.655   8
   1 -12   2 1125.24 131.090   1
  -1  12  -2 957.548 131.445   3
  -1  12  -2 1289.73 188.017   4
   1 -12   2 835.100 150.778   6
  -1  12  -3 270.357 114.877   4
  -1  12  -3 163.006 68.4152   3
   1 -12   3 164.785 48.7711   8
   1 -12   3 198.110 62.0188   1
   1 -12   4 444.772 94.8248   1
  -1  12  -4 562.846 106.106   3
  -1  12  -4 342.461 75.7395   7
  -1  12  -4 487.605 131.658   4
  -1  12  -5 237.618 80.9018   3
  -1  12  -5 140.464 91.9103   4
  -1  12  -5 14.1992 43.9703   7
   1 -12   5 224.427 77.1661   1
   1 -12   6 1944.53 201.639   1
  -1  12  -6 2138.99 207.671   3
  -1  12  -6 1811.45 228.781   4
   1 -12   7 685.245 128.680   1
  -1  12  -7 348.742 116.990   4
  -1  12  -7 650.714 122.590   3
  -1  12  -8 98.9101 99.0308  10
   1 -12   8 340.899 91.4057   1
  -1  12  -8 287.496 108.554   4
  -1  12  -9 2289.09 299.545  10
  -1  12  -9 2228.13 273.121   4
   1 -12   9 2036.29 223.399   1
  -1  12 -10 7.69482 97.0638  10
   1 -12  10-106.963 81.8436   1
  -1  12 -10 1.83994 82.8854   4
   1 -12  11 5440.18 396.606   1
  -1  12 -11 5371.36 485.481  10
  -1  12 -11 5266.00 419.939   4
  -1  12 -12-92.1977 120.267  10
  -1  12 -12 111.179 96.9133   4
   1 -12  12-0.15781 95.5726   1
  -1  12 -13 1724.41 248.010   4
  -1  12 -13 1858.79 301.862  10
   1 -12  13 2331.27 268.914   1
  -1  12 -14-13.1374 108.111  10
   1 -12  14 83.3278 69.2129   1
  -1  12 -14 63.5862 91.9674   4
  -1  12 -15-98.8760 120.308  10
  -1  12 -15 0.55313 82.7588   4
   1 -12  15 40.7724 71.5649   1
  -1  12 -16 323.981 163.547  10
  -1  12 -16 362.089 144.871   4
   1 -12  16 163.142 103.712   1
   1 -12  17 656.123 156.926   1
  -1  12 -17 333.584 160.250  10
   1 -12  18 755.614 186.832   1
   1 -11 -21 188.859 164.200   9
   1 -11 -21 143.028 102.682   6
   1 -11 -20 1263.00 287.735   9
   1 -11 -20 1381.20 267.067   6
  -1  11  20 1423.11 295.236   2
  -1  11  19 181.643 111.192   2
   1 -11 -19 148.054 119.828   9
   1 -11 -19 47.1380 85.4749   6
  -1  11  18 276.153 157.614   2
   1 -11 -18 152.487 107.091   9
   1 -11 -18 231.130 117.420   6
   1 -11 -17 91.5288 102.168   9
  -1  11  17 82.0384 103.175   2
   1 -11 -17 50.0594 97.8870   6
   1 -11 -16-57.1943 117.700   9
   1 -11 -16-155.085 116.407   6
  -1  11  16-68.2167 101.023   2
  -1  11  15-60.0386 107.209   2
   1 -11 -15 100.027 115.144   9
   1 -11 -15 82.0620 88.3885   6
  -1  11  14-13.1978 94.0337   2
  -1  11  14 25.7567 48.8433   4
   1 -11 -14-64.1729 96.5133   6
   1 -11 -14-118.980 123.864   9
   1 -11 -13 493.611 166.428   9
  -1  11  13 541.821 106.154   4
  -1  11  13 238.034 106.505   2
   1 -11 -13 484.253 149.530   6
  -1  11  12 5749.50 461.414   2
   1 -11 -12 5669.99 460.219   9
  -1  11  12 4872.48 320.073   4
   1 -11 -12 5163.02 425.062   6
   1 -11 -11-27.2709 103.432   9
  -1  11  11-26.6603 84.0070   2
  -1  11  11 28.3081 47.8770   4
   1 -11 -11 50.2482 86.8689   6
  -1  11  10 586.563 116.465   4
   1 -11 -10 540.474 149.300   9
  -1  11  10 345.667 120.710   2
   1 -11 -10 537.713 144.570   6
   1 -11  -9 565.765 137.181   6
  -1  11   9 584.682 158.716   2
   1 -11  -9 515.765 148.186   9
  -1  11   9 602.974 113.041   4
   1 -11  -9 514.723 84.8661   1
  -1  11   8 594.917 115.533   4
   1 -11  -8 514.206 131.251   9
  -1  11   8 474.463 134.235   2
   1 -11  -8 620.851 148.403   6
  -1  11   8 701.131 88.2233   8
   1 -11  -8 609.316 89.3325   1
   1 -11  -7 569.988 140.290   6
  -1  11   7 750.736 123.601   4
   1 -11  -7 818.544 169.261   9
  -1  11   7 664.353 149.136   2
  -1  11   7 792.105 89.2575   8
   1 -11  -7 733.996 92.7548   1
   1 -11  -6 126.342 76.2519   6
  -1  11   6 17.6962 66.2064   2
   1 -11  -6 161.516 93.6210   9
  -1  11   6 109.704 36.4474   8
  -1  11   6 225.130 88.0282   4
   1 -11  -6 205.400 51.1406   1
   1 -11  -5 787.799 91.6512   1
  -1  11   5 859.338 135.216   3
  -1  11   5 725.824 128.189   4
   1 -11  -5 527.641 130.836   9
   1 -11  -5 665.316 123.093   6
  -1  11   5 701.227 143.658   2
   1 -11  -4 669.604 85.4200   1
  -1  11   4 892.611 144.013   4
  -1  11   4 686.947 121.274   3
  -1  11   4 561.652 130.934   2
   1 -11  -4 463.608 109.818   6
  -1  11   3 508.351 115.143   4
  -1  11   3 326.531 106.771   2
   1 -11  -3 524.920 122.614   6
  -1  11   3 241.880 65.2290   3
  -1  11   2-111.752 75.0622   3
  -1  11   2 96.2979 78.7484   4
   1 -11  -2 14.5814 20.8689   8
   1 -11  -2-6.05003 61.0915   6
   1 -11  -1 7848.45 252.680   8
   1 -11  -1 7017.45 416.453   6
  -1  11   1 7551.40 375.382   3
  -1  11   1 7400.88 415.605   4
  -1  11   0 315.018 89.2244   3
   1 -11   0 379.025 117.234   6
   1 -11   0 396.198 83.9001   1
   1 -11   0 396.585 53.1807   8
  -1  11   0 573.793 129.702   4
   1 -11   1 2467.80 242.752   6
  -1  11  -1 3404.80 233.513   3
  -1  11  -1 2963.88 267.944   4
   1 -11   1 2839.65 198.069   1
   1 -11   1 3422.34 167.592   8
  -1  11  -2 115.453 63.5570   3
  -1  11  -2 92.9811 71.3553   4
   1 -11   2 181.918 77.2439   6
   1 -11   2 254.084 52.5417   8
   1 -11   2 127.616 56.2479   1
  -1  11  -3 164.310 86.5379   4
  -1  11  -3 113.676 44.8576   3
  -1  11  -3 98.7250 45.4116   7
   1 -11   3 112.074 56.8419   1
  -1  11  -4 110.273 76.5056   4
  -1  11  -4 161.904 53.0336   7
   1 -11   4 103.117 52.1659   1
  -1  11  -4 211.907 85.4443   3
  -1  11  -5 370.837 117.551   4
  -1  11  -5 180.699 50.7183   7
  -1  11  -5 344.298 88.4995   3
   1 -11   5 364.723 88.3200   1
  -1  11  -5 154.473 49.8167   5
  -1  11  -6 354.748 60.7212   5
   1 -11   6 414.739 94.3659   1
  -1  11  -6 162.721 42.3646   7
  -1  11  -6 382.314 101.196   4
  -1  11  -6 308.298 85.1718   3
   1 -11   7 5335.74 337.141   1
  -1  11  -7 6458.20 356.005   3
  -1  11  -7 5418.94 378.618   4
  -1  11  -7 4324.98 194.320   7
   1 -11   8 647.717 125.475   1
  -1  11  -8 676.449 159.497  10
  -1  11  -8 464.011 125.942   4
  -1  11  -8 328.062 41.3688   7
  -1  11  -9 187.141 69.3540   4
  -1  11  -9 369.699 136.846  10
   1 -11   9 233.205 83.5275   1
  -1  11 -10 3048.03 340.923  10
   1 -11  10 3114.86 281.249   1
  -1  11 -10 2574.43 280.089   4
   1 -11  11 1011.21 167.174   1
  -1  11 -11 1080.77 218.361  10
  -1  11 -11 996.919 181.904   4
   1 -11  12 2263.47 257.376   1
  -1  11 -12 2376.38 314.189  10
  -1  11 -12 2572.05 278.842   4
  -1  11 -13 1348.18 209.378   4
   1 -11  13 1360.05 206.238   1
  -1  11 -13 1572.74 265.188  10
  -1  11 -14 376.960 165.069  10
  -1  11 -14 142.169 96.9770   4
   1 -11  14 230.923 95.7947   1
  -1  11 -15 136.466 118.889  10
   1 -11  15 82.0872 75.8293   1
  -1  11 -15 169.487 104.015   4
  -1  11 -16 88.1726 95.1864  10
  -1  11 -16 479.868 130.030   4
   1 -11  16 352.044 129.401   1
   1 -11  17 111.175 78.8911   1
  -1  11 -17 60.0313 81.6015   4
  -1  11 -17 81.1255 103.987  10
  -1  11 -18 2392.14 372.532  10
   1 -11  18 2121.62 294.531   1
   1 -11  19 259.206 145.697   1
   1 -10 -22 404.834 152.855   6
   1 -10 -22 173.807 137.442   9
   1 -10 -21 1441.03 264.586   6
   1 -10 -21 1610.09 323.620   9
  -1  10  21 1582.70 306.193   2
   1 -10 -20-53.7580 113.164   6
   1 -10 -20 34.3940 120.149   9
  -1  10  20 261.008 152.052   2
  -1  10  19 1401.89 279.666   2
   1 -10 -19 1289.50 256.271   6
   1 -10 -19 1319.03 283.755   9
   1 -10 -18-72.4368 137.039   6
  -1  10  18 142.507 139.923   2
   1 -10 -18 17.2842 105.943   9
  -1  10  17 897.331 167.671   1
  -1  10  17 585.450 177.031   2
   1 -10 -17 295.189 134.624   6
   1 -10 -17 579.830 181.822   9
  -1  10  16 135.011 79.3945   1
   1 -10 -16-50.1825 101.193   6
  -1  10  16-25.4051 83.9924   2
   1 -10 -15 483.812 141.718   6
   1 -10 -15 431.289 158.505   9
  -1  10  15 799.704 140.709   1
  -1  10  15 509.856 154.737   2
   1 -10 -14 48.8186 87.0200   9
  -1  10  14 61.8033 54.0179   4
  -1  10  14 120.105 105.020   2
   1 -10 -14-83.5426 100.173   6
  -1  10  13 1621.42 238.979   2
   1 -10 -13 1179.75 226.169   9
   1 -10 -13 1345.71 226.027   6
  -1  10  13 1464.19 156.652   4
  -1  10  12 818.545 182.468   2
   1 -10 -12 761.781 166.897   6
   1 -10 -12 1158.66 208.580   9
  -1  10  12 920.652 125.025   4
  -1  10  11 227.182 74.2450   4
   1 -10 -11 20.7762 75.5117   9
  -1  10  11 99.1754 80.2190   2
   1 -10 -11 146.005 86.2833   6
   1 -10 -10-14.2684 71.1773   6
  -1  10  10 16.9521 68.6858   2
   1 -10 -10 48.5635 79.5677   9
  -1  10  10-20.7904 53.5960   4
   1 -10  -9 427.595 126.700   6
  -1  10   9 554.792 101.510   4
  -1  10   9 664.274 150.104   2
   1 -10  -9 508.121 85.7982   1
  -1  10   9 500.508 81.4494   8
   1 -10  -9 588.010 146.664   9
  -1  10   8 3834.09 332.632   2
   1 -10  -8 3755.94 325.069   6
  -1  10   8 3530.25 198.552   8
   1 -10  -8 3110.95 300.081   9
   1 -10  -8 3226.30 199.156   1
  -1  10   8 3343.56 240.179   4
  -1  10   7 513.878 66.9919   8
  -1  10   7 618.461 113.546   4
  -1  10   7 571.133 134.191   2
   1 -10  -7 542.752 80.9364   1
   1 -10  -7 618.155 138.910   6
   1 -10  -7 740.699 162.812   9
  -1  10   6 5914.60 334.148   4
   1 -10  -6 6319.57 414.643   9
  -1  10   6 5591.04 402.387   2
   1 -10  -6 6040.39 265.462   1
   1 -10  -6 6383.13 403.731   6
  -1  10   6 6071.91 241.262   8
   1 -10  -5-54.5811 40.0601   1
   1 -10  -5-77.2927 91.6820   9
  -1  10   5-49.4216 32.0481   8
   1 -10  -5-4.33554 78.7187   6
  -1  10   5 10.0802 68.9154   2
  -1  10   4 2296.97 243.135   2
  -1  10   4 2486.99 213.939   3
   1 -10  -4 2285.32 153.038   1
   1 -10  -4 2599.18 250.963   6
  -1  10   3 59.6321 55.5801   3
   1 -10  -3 45.3307 64.5140   6
  -1  10   3 28.9146 71.1710   2
   1 -10  -2 1402.85 85.2363   8
  -1  10   2 1415.16 154.462   3
  -1  10   2 1003.67 167.869   2
  -1  10   2 1186.29 158.393   4
   1 -10  -2 1527.93 184.471   6
   1 -10  -1 1189.88 82.3586   8
   1 -10  -1 1011.23 147.785   6
  -1  10   1 1213.37 161.846   4
  -1  10   1 1267.70 140.873   3
  -1  10   0 486.225 87.0460   3
   1 -10   0 709.719 68.7166   8
   1 -10   0 659.726 120.979   6
  -1  10   0 585.277 114.342   4
   1 -10   1 600.302 118.426   6
  -1  10  -1 667.285 130.336   4
   1 -10   1 807.959 75.8115   8
   1 -10   1 762.103 95.8845   1
  -1  10  -1 672.427 102.434   3
   1 -10   2 405.210 98.7470   6
   1 -10   2 638.478 98.1829   3
  -1  10  -2 408.443 78.4772   3
   1 -10   2 550.311 89.9823   1
  -1  10  -2 659.071 91.9746   7
  -1  10  -2 659.075 124.517   4
  -1  10  -3 259.580 92.6664   4
   1 -10   3 223.463 62.0731   1
  -1  10  -3 338.202 72.3084   3
  -1  10  -3 251.500 62.8279   7
  -1  10  -4 386.568 104.755   4
  -1  10  -4 238.385 54.3448   7
   1 -10   4 182.790 69.9342   1
  -1  10  -4 225.484 67.6095   3
   1 -10   5 1802.41 179.255   1
  -1  10  -5 1762.71 203.444   4
  -1  10  -5 1677.63 124.825   7
  -1  10  -5 2159.67 188.425   3
  -1  10  -6 250.619 67.7782   3
  -1  10  -6 464.543 112.785   4
   1 -10   6 421.661 94.0135   1
  -1  10  -6 307.789 50.4988   7
  -1  10  -6 294.314 50.9081   5
  -1  10  -7 2519.34 130.785   5
  -1  10  -7 2402.85 125.121   7
   1 -10   7 3573.68 258.930   1
  -1  10  -7 3877.08 303.215   4
  -1  10  -7 3920.04 268.517   3
  -1  10  -8 1710.38 232.645  10
  -1  10  -8 1253.94 187.305   4
   1 -10   8 1453.84 176.546   1
  -1  10  -9 2864.95 304.489  10
  -1  10  -9 2315.92 247.652   4
   1 -10   9 2754.22 253.965   1
  -1  10 -10 167.706 90.9401   4
  -1  10 -10 330.132 138.092  10
   1 -10  10 276.297 103.235   1
  -1  10 -11 182.160 90.8406   4
  -1  10 -11 99.8393 80.0412  10
   1 -10  11 153.794 74.1721   1
  -1  10 -12 2008.33 237.199   4
   1 -10  12 1790.94 225.488   1
  -1  10 -12 2176.07 309.087  10
   1 -10  13-11.8173 81.2899   1
  -1  10 -13 109.192 100.489  10
  -1  10 -13 101.813 78.7749   4
   1 -10  14 1103.14 183.462   1
  -1  10 -14 1456.50 289.192  10
  -1  10 -14 1075.65 181.843   4
  -1  10 -15-15.0076 93.8930  10
  -1  10 -15 144.763 98.5702   4
   1 -10  15-31.3068 92.7655   1
  -1  10 -16 168.347 117.472  10
  -1  10 -16 176.609 91.2504   4
   1 -10  16 129.961 87.5761   1
  -1  10 -17 494.266 169.860  10
  -1  10 -17 236.268 101.521   4
   1 -10  17 243.453 115.112   1
   1 -10  18 1844.73 270.700   1
  -1  10 -18 2462.33 373.787  10
   1 -10  19 400.708 134.090   1
  -1  10 -19 548.233 209.120  10
   1  -9 -22 50.8716 105.513   6
   1  -9 -22-102.173 130.716   9
   1  -9 -21 774.729 202.098   6
  -1   9  21 906.950 231.991   2
   1  -9 -21 850.657 243.066   9
   1  -9 -20 1585.14 261.916   6
   1  -9 -20 1488.58 287.413   9
  -1   9  20 2178.38 273.835   1
  -1   9  20 2113.79 345.679   2
  -1   9  19-28.8746 126.013   2
  -1   9  19 2.47612 77.2819   1
   1  -9 -19-100.944 115.649   9
   1  -9 -19 185.496 123.840   6
  -1   9  18 2582.19 275.868   1
   1  -9 -18 2413.67 311.938   6
   1  -9 -18 1869.79 309.368   9
  -1   9  18 1926.02 304.513   2
   1  -9 -17 646.760 160.485   6
  -1   9  17 613.439 174.504   2
  -1   9  17 705.799 143.910   1
   1  -9 -17 167.888 112.518   9
   1  -9 -16 365.054 148.037   9
  -1   9  16 577.476 130.558   1
  -1   9  16 695.272 180.236   2
   1  -9 -16 532.599 150.283   6
   1  -9 -15-13.3342 90.1448   9
  -1   9  15-39.4711 88.2403   2
   1  -9 -15 21.4236 88.0358   6
  -1   9  15-3.20386 64.0161   1
   1  -9 -14-236.348 160.389   9
  -1   9  14-13.1129 42.0123   4
   1  -9 -14-52.8947 76.5912   6
  -1   9  14-12.0229 91.6625   2
  -1   9  14-80.9458 69.9279   1
   1  -9 -13 141.419 78.4362   6
  -1   9  13 139.081 84.2142   2
  -1   9  13 216.415 71.6326   1
  -1   9  13 139.860 56.3482   4
   1  -9 -13 198.250 106.001   9
  -1   9  12 41.0379 52.8737   1
  -1   9  12-106.027 98.2754   2
   1  -9 -12-137.625 97.5079   9
   1  -9 -12 34.2539 68.6650   6
  -1   9  12 32.4393 43.4090   4
  -1   9  11 86.8195 71.6188   2
   1  -9 -11-117.862 116.800   9
  -1   9  11 63.7019 50.5418   4
   1  -9 -11-62.2934 80.9635   6
  -1   9  10 14.0717 42.5675   4
  -1   9  10-53.4426 88.3635   2
   1  -9 -10 18.7086 63.1769   6
   1  -9 -10-7.94564 88.1034   9
  -1   9   9 2239.95 157.067   8
   1  -9  -9 1923.35 232.064   6
   1  -9  -9 1928.36 232.549   9
  -1   9   9 2055.76 241.459   2
  -1   9   9 2009.10 177.214   4
   1  -9  -9 2399.36 174.489   1
  -1   9   8-25.9119 71.6484   2
   1  -9  -8-27.8496 86.9595   9
  -1   9   8 35.1139 55.1064   4
   1  -9  -8 18.4802 34.4090   1
  -1   9   8 2.39748 28.8712   8
   1  -9  -8-66.8902 75.0064   6
  -1   9   7 11777.4 378.102   8
   1  -9  -7 10906.8 392.129   1
   1  -9  -7 11606.7 571.826   9
  -1   9   7 12106.3 571.776   2
   1  -9  -7 11019.8 541.774   6
  -1   9   6 1277.47 187.264   2
   1  -9  -6 1326.70 183.967   6
   1  -9  -6 1247.62 113.252   1
  -1   9   6 1274.57 103.175   8
   1  -9  -6 1372.03 188.421   9
  -1   9   5 17781.8 701.741   2
   1  -9  -5 18149.5 690.718   6
  -1   9   5 18549.2 471.620   8
   1  -9  -5 16557.4 505.341   1
   1  -9  -5 17981.9 700.291   9
   1  -9  -4 158.550 77.7212   6
  -1   9   4 111.204 92.0896   2
  -1   9   4 168.711 34.5230   8
   1  -9  -4 120.605 37.0068   1
   1  -9  -4 113.805 73.8256   9
  -1   9   3 2596.18 199.368   3
  -1   9   3 2695.42 249.549   2
   1  -9  -3 1992.95 205.792   6
  -1   9   2 238.970 91.8987   2
   1  -9  -2 177.340 73.6102   6
  -1   9   2 166.365 61.6513   3
   1  -9  -2 184.344 29.6940   8
   1  -9  -1 739.426 125.533   6
   1  -9  -1 811.392 65.5955   8
  -1   9   1 791.642 110.612   3
  -1   9   0 4656.02 256.603   3
  -1   9   0 4367.00 282.246   4
   1  -9   0 4654.99 296.526   6
  -1   9   0 4183.55 240.048   7
   1  -9   0 4792.91 179.451   8
  -1   9  -1 2012.14 194.260   4
   1  -9   1 2194.58 159.444   1
   1  -9   1 1652.37 179.434   6
   1  -9   1 2201.16 122.589   8
  -1   9  -1 2054.47 158.033   7
  -1   9  -1 2079.62 169.983   3
   1  -9   2-69.3461 71.0200   6
   1  -9   2 2.01008 42.0670   3
  -1   9  -2 30.4895 35.7919   7
  -1   9  -2 59.5137 62.9540   4
   1  -9   2 29.8358 39.9703   1
  -1   9  -2-5.98548 47.0525   3
  -1   9  -3 164.262 47.1067   3
   1  -9   3 209.430 56.3791   3
  -1   9  -3 188.824 49.8556   7
  -1   9  -3 194.650 77.5690   4
   1  -9   3 173.723 57.9681   1
   1  -9   4 2012.92 174.303   1
  -1   9  -4 2327.51 182.137   3
  -1   9  -4 1986.14 198.392   4
   1  -9   4 2126.35 176.316   3
  -1   9  -4 1897.89 130.545   7
  -1   9  -5 1013.17 152.138   4
  -1   9  -5 1035.19 128.112   3
   1  -9   5 982.190 124.716   1
  -1   9  -5 843.503 80.0311   7
   1  -9   6 8622.39 398.587   1
  -1   9  -6 6872.37 244.510   7
  -1   9  -6 8361.90 424.546   4
  -1   9  -6 6973.53 247.435   5
  -1   9  -6 9122.25 393.889   3
  -1   9  -7 442.631 44.9503   7
  -1   9  -7 833.080 141.638   4
  -1   9  -7 517.299 48.8248   5
   1  -9   7 712.553 119.336   1
   1  -9   8 1421.01 172.254   1
  -1   9  -8 1680.65 229.101  10
  -1   9  -8 1245.91 171.084   4
   1  -9   9-43.0831 55.5494   1
  -1   9  -9-60.8961 83.2210  10
  -1   9  -9 22.7403 63.4647   4
   1  -9  10 1020.44 157.969   1
  -1   9 -10 984.976 160.106   4
  -1   9 -10 1467.64 222.776  10
   1  -9  11 101.386 68.1457   1
  -1   9 -11 109.521 79.1924  10
  -1   9 -11 41.2170 60.1679   4
  -1   9 -12 498.583 144.223  10
  -1   9 -12 437.056 111.281   4
   1  -9  12 443.951 115.035   1
  -1   9 -13 541.564 123.340   4
  -1   9 -13 658.870 172.318  10
   1  -9  13 734.120 156.081   1
  -1   9 -14 73.9449 115.503  10
   1  -9  14-129.475 92.1875   1
  -1   9 -14-144.938 97.3821   4
   1  -9  15 48.7484 69.9897   1
  -1   9 -15 136.117 90.3239   4
  -1   9 -15 69.6517 106.341  10
   1  -9  16 68.8064 80.8055   1
  -1   9 -16-139.677 115.013  10
  -1   9 -16 4.78499 63.1902   4
   1  -9  17 1546.16 239.784   1
  -1   9 -17 1636.76 291.964  10
  -1   9 -17 1590.70 211.027   4
   1  -9  18 466.141 145.058   1
  -1   9 -18 638.968 211.453  10
  -1   9 -19 2771.76 385.484  10
   1  -9  19 2033.42 286.815   1
   1  -9  20 31.7088 114.357   1
  -1   9 -20 114.363 130.643  10
   1  -8 -23-55.4414 132.281   9
   1  -8 -23-5.45060 88.1021   6
   1  -8 -22 725.080 195.883   6
   1  -8 -22 588.311 200.323   9
  -1   8  22 695.749 167.449   1
  -1   8  22 400.704 175.846   2
   1  -8 -21 89.1276 131.521   6
   1  -8 -21 28.0747 116.488   9
  -1   8  21-61.6410 110.819   1
  -1   8  21 89.1362 95.3223   2
  -1   8  20 1232.42 246.100   2
   1  -8 -20 939.405 231.404   9
   1  -8 -20 1085.49 220.495   6
  -1   8  20 1244.31 202.770   1
   1  -8 -19 74.2811 127.266   9
  -1   8  19 86.1663 110.193   2
   1  -8 -19-10.8209 74.6429   6
  -1   8  19 11.6450 103.172   1
   1  -8 -18 726.044 179.692   6
  -1   8  18 318.353 121.116   2
  -1   8  18 491.513 126.033   1
   1  -8 -18 382.937 165.646   9
  -1   8  17 1670.84 218.020   1
  -1   8  17 1454.78 253.321   2
   1  -8 -17 1302.93 236.620   9
   1  -8 -17 1562.62 243.246   6
   1  -8 -16 59.3381 91.0430   6
  -1   8  16 257.942 131.770   2
   1  -8 -16 21.8394 87.3795   9
  -1   8  16 218.293 90.3885   1
   1  -8 -15 1407.19 238.993   9
  -1   8  15 1436.63 187.225   1
   1  -8 -15 1591.85 240.412   6
  -1   8  15 1525.15 247.872   2
  -1   8  14 1738.98 255.240   2
   1  -8 -14 1786.79 233.406   6
  -1   8  14 1838.59 201.925   1
  -1   8  14 1440.44 139.393   4
   1  -8 -14 2124.01 278.223   9
  -1   8  13 175.052 81.7391   1
  -1   8  13 176.205 52.4634   4
   1  -8 -13 252.986 112.654   9
  -1   8  13 235.999 120.468   2
   1  -8 -13 106.128 76.5889   6
  -1   8  12 125.303 59.0999   4
  -1   8  12 114.674 94.8201   2
  -1   8  12 117.217 46.1930   1
   1  -8 -12 12.7037 79.9632   6
   1  -8 -12 148.986 90.1377   9
  -1   8  11 188.372 97.7200   2
  -1   8  11 214.064 65.4159   1
  -1   8  11 232.883 70.5611   4
   1  -8 -11 35.4978 78.8375   6
   1  -8 -11 177.383 92.1235   9
  -1   8  10-8.76902 74.1796   2
  -1   8  10 113.087 58.4383   1
   1  -8 -10-62.1914 105.884   6
  -1   8  10 53.0649 47.5610   4
   1  -8 -10-35.7718 66.7694   9
  -1   8   9-6.60638 41.5538   4
   1  -8  -9-109.854 107.640   9
  -1   8   9-10.5355 37.0246  10
   1  -8  -9-72.3059 92.0607   6
  -1   8   9-118.263 80.2797   2
   1  -8  -9-22.3103 47.0576   1
  -1   8   9-7.24253 38.3269   8
  -1   8   8 3544.53 190.072   8
   1  -8  -8 3878.75 214.309   1
   1  -8  -8 2908.79 263.741   6
   1  -8  -8 2973.13 279.213   9
  -1   8   8 3577.45 299.678   2
  -1   8   7 6584.84 399.069   2
   1  -8  -7 6033.65 387.585   9
  -1   8   7 7146.14 268.724   8
   1  -8  -7 6004.68 274.332   1
   1  -8  -7 6011.56 381.273   6
  -1   8   6 11310.4 350.074   8
   1  -8  -6 11588.4 527.003   9
  -1   8   6 11278.1 529.059   2
   1  -8  -6 10807.1 505.467   6
   1  -8  -6 11474.8 381.488   1
   1  -8  -5 15395.4 594.432   6
  -1   8   5 14538.4 400.729   8
  -1   8   5 14910.1 611.874   2
   1  -8  -5 15179.1 604.152   9
   1  -8  -5 14365.1 442.639   1
   1  -8  -4 1411.74 112.517   1
   1  -8  -4 1121.37 147.901   6
   1  -8  -4 1371.74 173.395   9
  -1   8   4 1508.99 95.4300   8
  -1   8   4 1575.34 188.088   2
   1  -8  -3 1922.00 185.701   6
  -1   8   3 2203.26 212.524   2
   1  -8  -2 835.904 134.301   6
  -1   8   2 1057.30 120.201   3
  -1   8   2 802.718 142.438   2
   1  -8  -2 1026.75 65.7451   8
  -1   8   1 602.887 92.4230   3
  -1   8   1 543.319 87.3892   7
   1  -8  -1 504.230 106.841   6
   1  -8  -1 544.530 50.6146   8
  -1   8   1 218.333 84.7620   2
  -1   8   0 498.713 81.6516   7
   1  -8   0 581.159 105.142   6
   1  -8   0 586.686 55.5689   8
  -1   8   0 527.812 83.8425   3
  -1   8  -1 72.6748 36.9823   7
  -1   8  -1 116.683 51.9679   3
   1  -8   1 30.3938 55.5014   6
  -1   8  -1 103.095 58.8906   4
   1  -8   1 114.396 30.8067   8
  -1   8  -2 18.4925 54.0755   4
   1  -8   2-9.52785 56.5301   6
  -1   8  -2 2.16820 39.7010   3
   1  -8   2 4.39876 41.8647   1
   1  -8   2-8.62661 40.7117   3
  -1   8  -2-23.2930 29.5939   7
  -1   8  -3 3094.34 229.932   4
   1  -8   3 3284.66 208.002   1
   1  -8   3 3240.95 202.868   3
  -1   8  -3 2884.01 162.678   7
  -1   8  -3 2953.24 192.342   3
  -1   8  -4 1578.40 172.761   4
   1  -8   4 1998.80 161.633   3
  -1   8  -4 1781.51 149.261   3
  -1   8  -4 1561.32 109.331   7
   1  -8   4 1543.08 148.282   1
   1  -8   5 4518.70 265.827   1
  -1   8  -5 4266.73 178.991   7
   1  -8   5 5089.76 269.647   3
  -1   8  -5 4623.57 292.894   4
  -1   8  -5 4944.22 264.536   3
  -1   8  -6 4779.59 174.758   5
  -1   8  -6 5251.60 314.102   4
   1  -8   6 6073.59 314.334   1
  -1   8  -6 4367.50 167.012   7
  -1   8  -6 5400.99 290.155   3
   1  -8   7 8037.20 393.769   1
  -1   8  -7 9263.69 480.353  10
  -1   8  -7 8209.19 412.008   4
   1  -8   8-6.26983 68.0460   1
  -1   8  -8-1.38252 57.5462   4
  -1   8  -8-43.5647 67.7709  10
  -1   8  -9-20.8742 66.3253  10
  -1   8  -9 45.8287 51.6293   4
   1  -8   9 81.9241 59.4843   1
   1  -8  10 212.823 81.8459   1
  -1   8 -10 249.785 89.8138   4
  -1   8 -10 14.8644 72.4429  10
   1  -8  11 381.107 100.509   1
  -1   8 -11 411.214 106.124   4
  -1   8 -11 577.303 148.923  10
  -1   8 -12-2.28077 109.616  10
  -1   8 -12 100.579 72.4974   4
   1  -8  12-43.6953 75.5207   1
  -1   8 -13 1067.70 199.148  10
  -1   8 -13 1055.35 162.523   4
   1  -8  13 1034.19 172.457   1
   1  -8  14 578.088 140.258   1
  -1   8 -14 593.369 121.346   4
  -1   8 -14 542.088 157.829  10
  -1   8 -15 196.966 133.255  10
  -1   8 -15 121.331 78.9771   4
   1  -8  15 186.649 86.2874   1
   1  -8  16 762.214 164.985   1
  -1   8 -16 796.577 141.255   4
  -1   8 -16 922.177 212.336  10
  -1   8 -17 355.727 101.470   4
  -1   8 -17 411.615 164.322  10
   1  -8  17 335.419 128.943   1
  -1   8 -18 2318.30 350.783  10
   1  -8  18 2253.24 295.975   1
   1  -8  19-12.7515 89.5823   1
  -1   8 -19 214.775 119.502  10
   1  -8  20 554.015 159.690   1
  -1   8 -20 542.078 176.951  10
  -1   8 -21 490.654 183.266  10
  -1   7  24 567.232 166.439   1
   1  -7 -24 564.870 178.899   6
  -1   7  23 223.335 94.8263   1
   1  -7 -23 52.4064 75.2318   6
   1  -7 -23 34.9631 132.280   9
  -1   7  22 49.7177 102.701   2
   1  -7 -22 204.859 104.695   6
  -1   7  22 242.708 101.451   1
   1  -7 -22 98.6599 132.865   9
   1  -7 -21 141.726 102.928   6
  -1   7  21-198.359 125.305   1
  -1   7  21 48.6001 94.1479   2
   1  -7 -21 64.0773 117.870   9
   1  -7 -20 397.395 140.048   6
  -1   7  20 514.403 138.009   1
   1  -7 -20 477.352 184.870   9
  -1   7  20 422.990 139.536   2
  -1   7  19-138.571 107.973   2
  -1   7  19-42.4013 78.6336   1
   1  -7 -19-68.8477 94.2436   6
   1  -7 -19-163.990 136.460   9
  -1   7  18-5.35481 61.2915   1
   1  -7 -18 102.783 84.4609   6
  -1   7  18-226.346 159.626   2
   1  -7 -18-82.8490 121.485   9
   1  -7 -17 731.751 172.769   6
  -1   7  17 498.289 162.207   2
   1  -7 -17 519.869 175.330   9
  -1   7  17 510.734 130.281   1
  -1   7  16 5200.29 367.138   1
   1  -7 -16 3717.73 399.250   9
   1  -7 -16 4290.96 377.982   6
  -1   7  16 4690.42 428.578   2
  -1   7  15 520.744 122.795   1
   1  -7 -15 536.893 156.544   9
  -1   7  15 529.843 162.775   2
   1  -7 -15 638.338 150.484   6
  -1   7  14 4643.21 227.417   4
   1  -7 -14 5860.40 451.713   9
   1  -7 -14 5489.94 406.095   6
  -1   7  14 5364.68 353.009   1
  -1   7  14 5580.89 445.055   2
  -1   7  13 2407.68 161.801   4
  -1   7  13 2623.65 236.484   1
   1  -7 -13 2808.48 282.357   6
  -1   7  13 3167.78 327.801   2
   1  -7 -13 2657.48 304.712   9
  -1   7  12 966.173 105.486   4
   1  -7 -12 1300.53 210.694   9
   1  -7 -12 1123.73 184.171   6
  -1   7  12 1463.75 214.616   2
  -1   7  12 1256.54 155.546   1
  -1   7  11-78.4929 60.5360   1
  -1   7  11-1.63599 93.8834   2
   1  -7 -11-52.1199 79.4843   6
   1  -7 -11-72.0211 86.1976   9
  -1   7  11 60.0183 43.4401   4
  -1   7  10-24.2221 37.6669  10
   1  -7 -10 21.9647 68.2019   9
  -1   7  10-24.2010 43.8642   1
  -1   7  10-96.2018 85.4661   2
  -1   7  10 11.3913 37.2187   4
   1  -7 -10 5.50153 58.8666   6
  -1   7   9 293.933 69.6766   1
   1  -7  -9 190.327 94.5887   9
  -1   7   9 162.873 58.8396  10
  -1   7   9 191.635 50.9971   4
   1  -7  -9 345.139 103.978   6
   1  -7  -9 151.487 50.8697   1
  -1   7   9 220.130 88.0608   2
   1  -7  -8 452.670 105.177   6
  -1   7   8 525.336 123.072   2
  -1   7   8 563.860 76.3544   8
   1  -7  -8 688.275 90.5011   1
   1  -7  -8 401.906 104.773   9
   1  -7  -7 1205.24 114.028   1
  -1   7   7 1069.74 156.708   2
   1  -7  -7 911.798 148.112   9
   1  -7  -7 974.182 142.083   6
  -1   7   7 1222.56 103.062   8
   1  -7  -6 5918.46 252.250   1
   1  -7  -6 6373.43 365.393   9
  -1   7   6 5775.49 351.562   2
  -1   7   6 5618.93 221.793   8
   1  -7  -6 5554.36 343.869   6
   1  -7  -5 3718.56 267.962   6
  -1   7   5 4002.58 285.100   2
   1  -7  -5 4163.81 289.521   9
   1  -7  -5 3891.54 192.648   1
  -1   7   5 4025.37 169.685   8
   1  -7  -4 7835.01 287.583   1
  -1   7   4 8036.71 401.232   2
  -1   7   4 8128.69 248.930   8
   1  -7  -4 8688.14 412.831   9
   1  -7  -4 8535.13 400.149   6
   1  -7  -3 3983.96 259.014   6
  -1   7   3 3726.30 264.562   2
  -1   7   3 3573.45 141.196   8
  -1   7   2 1419.08 166.157   2
  -1   7   2 1562.92 136.154   7
   1  -7  -2 1407.55 153.229   6
  -1   7   2 1460.01 133.068   3
   1  -7  -2 1512.37 76.6208   8
  -1   7   1-41.1814 45.5170   3
  -1   7   1-80.9325 74.9305   2
   1  -7  -1-13.6819 20.5482   8
   1  -7  -1 11.5903 50.6581   6
  -1   7   1-41.1663 55.1288   6
  -1   7   1-13.7314 33.5962   7
  -1   7   0 3245.65 219.246   6
  -1   7   0 3429.70 192.751   3
   1  -7   0 3464.25 134.518   8
  -1   7   0 2881.71 175.833   7
   1  -7   0 3585.91 231.278   6
  -1   7  -1 7987.38 311.990   3
  -1   7  -1 8873.07 372.081   6
  -1   7  -1 8318.88 365.188   4
   1  -7   1 8584.74 321.412   3
  -1   7  -1 7613.38 293.840   7
   1  -7   1 8612.84 377.531   6
  -1   7  -2 9809.87 332.032   7
  -1   7  -2 10790.3 369.870   3
   1  -7   2 10937.2 377.272   1
  -1   7  -2 10425.8 420.355   4
  -1   7  -2 11003.9 425.780   6
   1  -7   2 11369.2 382.542   3
   1  -7   2 10216.9 420.849   6
  -1   7  -3 245.354 62.8202   6
  -1   7  -3 435.518 69.4950   3
   1  -7   3 381.047 67.3781   3
  -1   7  -3 381.357 94.1292   4
  -1   7  -3 323.351 52.8250   7
   1  -7   3 279.515 65.1509   1
  -1   7  -4 3043.76 224.556   4
   1  -7   4 3105.22 193.956   3
  -1   7  -4 3351.03 215.977   6
   1  -7   4 3072.19 205.825   1
  -1   7  -4 2910.58 139.184   7
  -1   7  -4 3031.81 191.773   3
  -1   7  -5 16763.7 545.012   6
  -1   7  -5 15744.6 504.119   3
   1  -7   5 17021.6 519.266   3
   1  -7   5 15075.0 518.922   1
  -1   7  -5 16335.3 554.852   4
   1  -7   6 1558.56 148.234   3
  -1   7  -6 1561.43 146.122   3
  -1   7  -6 1516.03 152.326   6
  -1   7  -6 1038.06 63.6871   5
  -1   7  -6 1337.29 151.686   4
  -1   7  -6 1112.52 63.9903   7
   1  -7   6 1544.85 154.909   1
   1  -7   7 11378.9 469.813   1
  -1   7  -7 11189.0 457.928   6
  -1   7  -7 12089.4 482.623   4
  -1   7  -7 12168.4 545.009  10
  -1   7  -8 174.692 59.1806   6
  -1   7  -8 35.1779 49.8632   4
  -1   7  -8 209.843 100.870  10
   1  -7   8 178.484 73.5959   1
   1  -7   9 659.101 119.286   1
  -1   7  -9 684.159 150.322  10
  -1   7  -9 636.978 115.215   4
  -1   7 -10 437.184 99.1644   4
   1  -7  10 362.175 92.5742   1
  -1   7 -10 615.246 144.162  10
   1  -7  11 2512.67 235.867   1
  -1   7 -11 2835.39 238.879   4
  -1   7 -11 2855.56 290.920  10
  -1   7 -12 533.010 136.270  10
   1  -7  12 504.464 116.443   1
  -1   7 -12 540.134 114.366   4
  -1   7 -13 7405.85 391.007   4
  -1   7 -13 7371.99 504.821  10
   1  -7  13 6749.68 429.853   1
  -1   7 -14 6.99164 57.9065   4
  -1   7 -14 42.6848 82.5205  10
   1  -7  14-36.4868 78.3818   1
  -1   7 -15 2132.94 292.845  10
   1  -7  15 2437.95 269.518   1
  -1   7 -15 2095.89 208.007   4
   1  -7  16 866.892 180.857   1
  -1   7 -16 793.907 193.589  10
  -1   7 -16 858.688 133.961   4
  -1   7 -17 689.951 187.185  10
  -1   7 -17 399.105 104.249   4
   1  -7  17 388.658 122.032   1
  -1   7 -18 1885.15 296.837  10
   1  -7  18 1345.84 225.853   1
  -1   7 -19 317.794 119.026  10
   1  -7  19 392.036 137.299   1
  -1   7 -20 1087.10 247.730  10
   1  -7  20 879.142 195.968   1
  -1   7 -21 396.026 182.340  10
   1  -7  21 126.146 102.600   1
  -1   6  25-53.2251 104.716   1
   1  -6 -24 655.149 191.496   6
  -1   6  24 553.250 173.257   1
   1  -6 -24 291.206 168.384   9
  -1   6  23 170.260 119.598   2
   1  -6 -23 241.371 113.098   6
   1  -6 -23 355.825 179.765   9
  -1   6  23 291.074 125.807   1
   1  -6 -22 384.819 197.010   9
  -1   6  22 235.858 169.709   2
   1  -6 -22 248.024 117.287   6
  -1   6  22 297.513 131.191   1
  -1   6  21 521.061 149.194   1
   1  -6 -21 265.439 132.326   6
  -1   6  21 285.944 142.463   2
   1  -6 -21 181.247 141.988   9
   1  -6 -20-89.8320 114.464   6
  -1   6  20 120.400 87.6080   1
   1  -6 -20 87.1518 131.409   9
  -1   6  20 177.255 92.8133   2
   1  -6 -19-43.0817 136.725   9
  -1   6  19 8.04486 100.602   2
  -1   6  19 92.1275 77.9046   1
   1  -6 -19 21.8607 90.1181   6
  -1   6  18 58.0071 88.6597   2
   1  -6 -18-55.4814 92.8061   6
   1  -6 -18 105.415 96.9470   9
  -1   6  18 92.6837 60.2205   1
   1  -6 -17-42.9772 83.5096   6
   1  -6 -17-118.830 134.242   9
  -1   6  17 30.4163 61.1821   1
  -1   6  17-10.2769 98.3978   2
  -1   6  16 1345.99 246.349   2
   1  -6 -16 1097.96 218.869   9
  -1   6  16 1486.12 198.253   1
   1  -6 -16 1016.27 185.628   6
   1  -6 -15 3217.15 315.583   6
  -1   6  15 4091.63 307.137   1
  -1   6  15 3682.01 364.463   2
   1  -6 -15 3672.48 374.735   9
  -1   6  14 99.1698 32.2337   4
  -1   6  14 81.5847 59.0949   1
   1  -6 -14 201.297 113.160   9
   1  -6 -14 46.2380 77.6158   6
  -1   6  14 322.974 132.505   2
   1  -6 -13 2801.64 280.138   6
  -1   6  13 3093.49 250.027   1
   1  -6 -13 3289.12 321.988   9
  -1   6  13 2644.40 151.998   4
  -1   6  13 3300.37 324.301   2
  -1   6  12 23.0011 46.2711   1
   1  -6 -12 49.0613 89.0054   9
  -1   6  12-21.6053 66.9214   2
  -1   6  12-0.25223 31.7902   4
   1  -6 -12-2.46877 59.9097   6
  -1   6  11 922.099 165.373   2
   1  -6 -11 852.910 147.011   6
   1  -6 -11 967.826 169.160   9
  -1   6  11 807.442 90.6486   4
  -1   6  11 905.784 126.322   1
  -1   6  10 353.556 98.1351   2
   1  -6 -10 527.826 123.990   6
  -1   6  10 412.573 67.3837   4
  -1   6  10 525.671 95.2055  10
   1  -6 -10 339.693 105.744   9
  -1   6  10 417.712 83.0608   1
  -1   6   9 417.532 77.9557  10
   1  -6  -9 556.028 123.690   6
   1  -6  -9 625.703 129.089   9
  -1   6   9 561.591 127.766   2
  -1   6   9 470.733 68.9826   4
  -1   6   9 478.421 83.7658   1
   1  -6  -9 575.237 90.0475   1
  -1   6   8 156.891 58.9692  10
  -1   6   8 205.091 59.9739   1
  -1   6   8 202.153 79.3107   2
   1  -6  -8 135.167 77.2138   6
   1  -6  -8 125.430 72.9980   9
   1  -6  -8 241.611 62.8545   1
   1  -6  -7 9.15132 63.1271   6
  -1   6   7-2.45005 58.7151   2
   1  -6  -7 22.3336 35.3248   1
   1  -6  -7-43.2368 69.5145   9
  -1   6   7 30.1833 35.3638   1
   1  -6  -6 823.075 138.176   9
  -1   6   6 997.797 85.9479   8
   1  -6  -6 836.982 129.808   6
   1  -6  -6 984.342 99.2397   1
  -1   6   6 886.577 134.067   2
   1  -6  -5 8277.16 395.243   6
   1  -6  -5 8895.27 305.480   1
  -1   6   5 8657.66 403.697   2
   1  -6  -5 8530.26 398.988   9
  -1   6   5 8464.45 265.111   8
   1  -6  -4 749.057 113.699   6
   1  -6  -4 647.654 75.5300   1
  -1   6   4 789.919 64.6966   8
  -1   6   4 942.858 113.226   7
   1  -6  -4 859.741 131.063   9
  -1   6   4 837.658 130.765   2
  -1   6   3 164.523 67.3687   2
   1  -6  -3 259.677 72.0145   6
  -1   6   3 206.245 29.1504   8
  -1   6   3 314.527 79.4298   6
   1  -6  -3 274.937 79.1668   2
  -1   6   3 220.338 61.3761   7
   1  -6  -2 7343.22 196.533   8
   1  -6  -2 7552.26 336.415   6
  -1   6   2 7787.21 339.175   6
  -1   6   2 7413.49 356.968   2
  -1   6   2 7402.26 301.719   7
  -1   6   2 7150.63 204.577   8
   1  -6  -2 8246.40 361.468   2
   1  -6  -1 2763.31 103.584   8
  -1   6   1 2585.55 159.806   3
   1  -6  -1 2199.36 176.088   6
  -1   6   1 2595.54 160.567   7
  -1   6   1 2469.31 182.336   6
  -1   6   1 2730.44 210.795   2
   1  -6  -1 2527.85 196.176   2
   1  -6   0 2009.33 91.9947   8
   1  -6   0 2201.69 179.056   2
  -1   6   0 2079.13 138.703   3
  -1   6   0 1870.73 131.114   7
   1  -6   0 2119.79 168.544   6
  -1   6   0 2078.01 160.238   6
  -1   6  -1 16446.8 473.139   7
  -1   6  -1 16994.9 549.743   4
  -1   6  -1 19986.3 571.628   6
   1  -6   1 20825.7 612.434   2
   1  -6   1 18006.8 560.894   6
  -1   6  -1 17467.6 493.729   3
   1  -6   1 19454.5 512.065   3
   1  -6   2 273.002 66.7721   6
  -1   6  -2 270.145 56.3094   3
   1  -6   2 190.821 46.5411   3
  -1   6  -2 308.589 76.1033   4
   1  -6   2 240.606 65.5146   2
  -1   6  -2 306.970 74.2439   6
  -1   6  -2 197.043 40.2258   7
   1  -6   2 275.339 64.2237   1
  -1   6  -3 7528.83 315.710   6
   1  -6   3 7422.59 284.049   3
   1  -6   3 6908.17 296.469   1
  -1   6  -3 7477.21 328.440   4
  -1   6  -3 6572.40 226.615   7
  -1   6  -3 7334.62 281.543   3
  -1   6  -4 772.745 98.4385   6
   1  -6   4 697.762 87.9504   3
  -1   6  -4 711.024 89.5428   3
   1  -6   4 699.736 97.2782   1
  -1   6  -4 739.403 105.577   4
  -1   6  -4 792.083 62.1676   7
  -1   6  -5 999.105 65.0939   7
   1  -6   5 1481.23 134.016   3
  -1   6  -5 1163.44 71.9937   5
  -1   6  -5 1413.99 135.393   6
  -1   6  -5 1370.90 127.194   3
   1  -6   5 1375.04 139.510   1
  -1   6  -6 1056.93 126.918   4
  -1   6  -6 1322.72 165.425  10
   1  -6   6 1202.09 126.272   3
  -1   6  -6 1233.50 128.933   6
   1  -6   6 1424.08 147.926   1
   1  -6   7 2530.78 192.395   3
  -1   6  -7 2183.23 180.997   4
  -1   6  -7 2450.67 188.459   6
  -1   6  -7 2700.33 237.573  10
   1  -6   7 2571.28 201.594   1
   1  -6   8 2146.96 193.444   1
  -1   6  -8 1965.75 223.360  10
  -1   6  -8 2075.41 180.966   4
  -1   6  -9 134.581 52.5055   4
  -1   6  -9 91.0406 71.5306  10
   1  -6   9 67.2869 50.2375   1
   1  -6  10 193.558 72.8023   1
  -1   6 -10 157.588 74.6225  10
  -1   6 -10 154.051 66.1396   4
  -1   6 -11 2347.02 262.063  10
  -1   6 -11 2123.51 189.400   4
   1  -6  11 2091.07 209.799   1
  -1   6 -12 11065.0 461.567   4
  -1   6 -12 11215.3 593.912  10
   1  -6  12 9944.07 505.582   1
  -1   6 -13 2130.28 193.990   4
  -1   6 -13 2201.81 270.126  10
   1  -6  13 2100.81 227.919   1
   1  -6  14 5866.68 397.914   1
  -1   6 -14 4929.66 306.570   4
  -1   6 -14 5838.83 444.362  10
   1  -6  15 1814.21 222.926   1
  -1   6 -15 1641.42 176.755   4
  -1   6 -15 1963.56 274.203  10
  -1   6 -16 703.860 121.462   4
  -1   6 -16 472.648 145.096  10
   1  -6  16 861.232 162.433   1
  -1   6 -17 460.143 101.680   4
  -1   6 -17 352.019 139.205  10
   1  -6  17 535.889 143.540   1
  -1   6 -18 412.881 148.817  10
  -1   6 -18 612.389 151.045   6
   1  -6  18 639.747 161.149   1
   1  -6  19 530.165 144.024   1
  -1   6 -19 625.677 174.699  10
  -1   6 -19 676.741 152.366   6
  -1   6 -20-182.276 149.547  10
   1  -6  20-25.2297 80.5035   1
  -1   6 -21 429.845 173.459  10
   1  -6  21 247.231 120.225   1
  -1   6 -22 157.616 131.590  10
   1  -5 -25 693.152 185.620   6
  -1   5  25 441.963 151.179   1
  -1   5  24 143.012 94.9466   1
   1  -5 -24 3.89638 87.9743   6
   1  -5 -24 186.120 179.933   9
  -1   5  23 55.3212 106.673   1
  -1   5  23 68.4137 106.772   2
   1  -5 -23-85.9962 95.7531   6
   1  -5 -23-121.309 153.463   9
   1  -5 -22 787.985 239.113   9
  -1   5  22 938.217 187.538   1
  -1   5  22 1077.60 249.752   2
   1  -5 -22 1155.56 221.687   6
  -1   5  21 76.1860 77.3847   1
   1  -5 -21 14.0349 118.689   9
   1  -5 -21 6.13085 76.6012   6
  -1   5  21 206.069 115.554   2
   1  -5 -20 546.859 151.171   6
  -1   5  20 437.503 178.052   2
  -1   5  20 578.394 147.393   1
   1  -5 -20 472.032 194.543   9
   1  -5 -19-167.886 112.805   6
  -1   5  19-30.8115 79.5802   1
   1  -5 -19 82.6325 94.7332   9
  -1   5  19-117.140 142.131   2
   1  -5 -18 398.634 146.546   9
  -1   5  18 209.596 96.6680   1
  -1   5  18 109.550 99.9677   2
   1  -5 -18 183.125 101.746   6
  -1   5  17-36.5217 96.8182   2
   1  -5 -17 78.7637 91.6755   9
  -1   5  17 18.3311 72.9598   1
   1  -5 -17-88.0704 97.4056   6
  -1   5  16 161.702 92.2217   2
   1  -5 -16 139.078 107.164   9
  -1   5  16 208.690 92.0321   1
   1  -5 -16 167.624 97.6933   6
  -1   5  15 815.639 185.548   2
   1  -5 -15 527.200 155.833   9
   1  -5 -15 527.304 128.423   6
  -1   5  15 864.550 146.080   1
  -1   5  14 1226.71 170.685   1
   1  -5 -14 843.158 169.097   9
  -1   5  14 742.534 61.1977   4
   1  -5 -14 1148.15 187.820   6
  -1   5  14 1086.17 200.962   2
  -1   5  13 80.2923 27.4823   4
   1  -5 -13 204.365 112.456   9
  -1   5  13 87.2704 56.4648   1
   1  -5 -13 168.374 84.2891   6
  -1   5  13 44.3260 71.2316   2
  -1   5  12 4552.58 356.874   2
  -1   5  12 4961.61 306.277   1
   1  -5 -12 4675.02 367.745   9
  -1   5  12 3994.09 175.130   4
   1  -5 -12 4160.35 321.158   6
  -1   5  11 118.936 37.0958   4
  -1   5  11 192.874 71.2164   1
   1  -5 -11 102.680 87.8998   9
  -1   5  11 117.166 81.7438   2
   1  -5 -11 233.987 90.1810   6
  -1   5  10 3669.47 172.748   4
   1  -5 -10 3491.55 292.766   9
  -1   5  10 3770.39 242.027   1
  -1   5  10 3378.78 292.136   2
   1  -5 -10 3244.40 273.283   6
  -1   5  10 3669.87 238.008  10
  -1   5   9 1642.02 149.885  10
  -1   5   9 1608.58 116.053   4
   1  -5  -9 1500.08 184.566   6
  -1   5   9 1712.51 152.578   1
  -1   5   9 1525.17 183.803   2
   1  -5  -9 1670.72 146.208   1
   1  -5  -9 1418.04 179.569   9
   1  -5  -8 232.965 56.4286   1
   1  -5  -8 135.735 87.1576   9
  -1   5   8 292.012 95.6948   2
  -1   5   8 271.945 66.2698  10
  -1   5   8 197.445 58.1758   1
   1  -5  -8 335.452 90.3466   6
   1  -5  -7 1975.87 195.344   9
  -1   5   7 1911.76 150.104  10
   1  -5  -7 2285.12 154.455   1
  -1   5   7 2213.66 206.437   2
   1  -5  -7 2164.75 193.541   6
  -1   5   7 2013.82 149.377   1
  -1   5   6 3872.44 248.758   9
   1  -5  -6 3585.09 247.327   6
   1  -5  -6 3500.51 185.173   1
  -1   5   6 3414.30 243.955   2
   1  -5  -6 3270.00 241.648   9
  -1   5   6 3557.18 189.386   1
   1  -5  -5 121.652 41.0711   1
  -1   5   5 97.6449 51.9864   6
   1  -5  -5 111.439 64.9643   9
   1  -5  -5 126.424 57.2570   2
   1  -5  -5 111.473 62.1906   6
  -1   5   5 44.2131 53.7558   2
  -1   5   5 139.292 52.9106   7
  -1   5   4 22.6684 21.5943   8
  -1   5   4 41.1388 57.3995   2
   1  -5  -4-93.0381 69.2390   6
  -1   5   4 23.9446 43.4800   7
   1  -5  -4 24.3997 51.6510   9
   1  -5  -4 8.99788 28.1370   1
  -1   5   4 9.08871 44.2018   6
   1  -5  -4-46.5708 52.8321   2
  -1   5   3 30.0686 21.1629   8
  -1   5   3-27.8773 35.9016   7
   1  -5  -3 33.3842 44.6708   2
   1  -5  -3 19.6646 33.5860   1
  -1   5   3-80.6260 64.3632   2
   1  -5  -3 8.83341 50.7865   9
  -1   5   3 49.2927 40.5833   6
   1  -5  -3 44.2162 49.6118   6
  -1   5   2 4322.44 250.201   2
   1  -5  -2 4781.43 257.183   2
  -1   5   2 4324.01 137.112   8
  -1   5   2 4550.84 215.621   7
   1  -5  -2 4619.71 239.366   6
  -1   5   2 4807.95 241.800   6
   1  -5  -1 11762.3 265.798   8
  -1   5   1 11407.2 359.953   7
  -1   5   1 10720.2 390.313   6
  -1   5   1 11020.4 419.267   2
  -1   5   1 11756.8 354.996   3
   1  -5  -1 11327.7 398.675   6
   1  -5  -1 11579.8 418.107   2
  -1   5   0 101.234 47.1409   6
   1  -5   0 7.98892 51.8405   6
  -1   5   0 95.8990 36.8282   7
   1  -5   0 7.57099 38.1119   2
   1  -5   0 71.3964 21.1053   8
  -1   5   0-2.82857 33.9404   3
   1  -5   1 5006.89 236.278   6
  -1   5  -1 4773.57 195.695   7
   1  -5   1 5506.98 213.703   3
   1  -5   1 6125.10 282.172   2
  -1   5  -1 5447.74 243.906   6
  -1   5  -1 5333.48 245.957   4
  -1   5  -1 5249.82 208.416   3
  -1   5  -2 4036.82 182.468   3
  -1   5  -2 4641.49 230.990   4
   1  -5   2 4591.60 193.776   3
   1  -5   2 4208.21 218.366   6
  -1   5  -2 4304.11 217.136   6
  -1   5  -2 4143.42 165.039   7
  -1   5  -3 2037.08 100.386   7
   1  -5   3 2292.02 154.075   1
  -1   5  -3 2422.86 153.847   6
  -1   5  -3 2030.25 155.631   4
   1  -5   3 2017.80 130.924   3
  -1   5  -3 2242.62 138.504   3
  -1   5  -4 8260.09 296.502   3
  -1   5  -4 6730.53 201.882   7
   1  -5   4 8483.42 326.245   1
  -1   5  -4 8184.01 314.759   6
   1  -5   4 8693.45 306.407   3
  -1   5  -4 8015.47 324.711   4
  -1   5  -5 418.137 84.9449   4
  -1   5  -5 485.497 82.1377   6
  -1   5  -6 625.188 116.787  10
   1  -5   6 631.452 99.6482   1
   1  -5   6 578.906 88.7463   3
  -1   5  -6 593.951 92.7554   4
  -1   5  -7 966.773 137.555  10
   1  -5   7 1126.40 129.605   1
   1  -5   7 1001.25 120.854   3
  -1   5  -7 869.857 113.151   4
   1  -5   8 632.252 111.327   1
  -1   5  -8 537.405 127.580  10
  -1   5  -8 555.437 93.6324   4
   1  -5   9 827.678 124.714   1
  -1   5  -9 729.516 105.074   4
  -1   5  -9 704.865 138.346  10
   1  -5  10-64.0582 76.9921   1
  -1   5 -10-31.4663 49.1910   4
  -1   5 -10 146.222 84.9877  10
  -1   5 -11 290.636 108.717  10
  -1   5 -11 191.840 61.7165   4
   1  -5  11 117.972 62.8241   1
  -1   5 -12 11620.3 452.501   4
  -1   5 -12 12294.7 605.404  10
   1  -5  12 11173.8 526.819   1
  -1   5 -13 3575.56 335.970  10
   1  -5  13 3610.12 293.784   1
  -1   5 -13 3192.05 226.304   4
  -1   5 -14 7583.01 501.204  10
  -1   5 -14 6773.28 345.176   4
   1  -5  14 7393.63 440.471   1
  -1   5 -15 1149.31 213.148  10
  -1   5 -15 1096.67 138.654   4
   1  -5  15 1031.69 165.449   1
   1  -5  16 126.015 70.5588   1
  -1   5 -16 261.384 75.2436   4
  -1   5 -16 182.064 119.474  10
  -1   5 -17-89.5252 108.690   6
  -1   5 -17 119.832 63.0335   4
   1  -5  17 45.9061 60.8398   1
  -1   5 -17-44.1075 104.956  10
   1  -5  18 35.8536 97.7196   1
  -1   5 -18 133.642 100.082  10
  -1   5 -18 119.964 70.1628   6
  -1   5 -19 736.767 193.624  10
  -1   5 -19 419.681 122.398   6
   1  -5  19 484.497 145.773   1
  -1   5 -20 529.422 142.958   6
  -1   5 -20 670.362 180.357  10
   1  -5  20 601.353 171.534   1
   1  -5  21 47.0888 78.6658   1
  -1   5 -21 129.457 127.064  10
   1  -5  22 609.303 173.973   1
  -1   5 -22 545.733 184.997  10
  -1   5 -23 546.680 213.071  10
  -1   4  25 348.110 134.972   1
   1  -4 -25 240.970 114.980   6
   1  -4 -24-17.5676 109.382   6
  -1   4  24-16.1689 85.3868   1
  -1   4  23 72.9815 82.1556   1
   1  -4 -23 171.415 112.078   6
   1  -4 -22 176.546 97.2200   6
   1  -4 -22 18.2427 141.033   9
  -1   4  22 210.039 155.558   2
  -1   4  22 226.883 102.880   1
   1  -4 -21 1824.34 265.492   6
  -1   4  21 1883.79 313.055   2
  -1   4  21 1885.84 258.361   1
   1  -4 -21 2195.77 356.434   9
  -1   4  20 293.214 156.812   2
   1  -4 -20 154.240 98.8655   6
  -1   4  20 259.436 105.502   1
   1  -4 -20 146.906 136.145   9
  -1   4  19 1984.64 301.089   2
   1  -4 -19 1932.95 256.388   6
   1  -4 -19 1943.00 314.688   9
  -1   4  19 1402.65 214.833   1
  -1   4  18-188.047 106.526   1
   1  -4 -18-4.59903 74.0846  10
  -1   4  18-47.1451 94.7187   2
   1  -4 -18 59.2021 79.1526   6
   1  -4 -18 14.5813 99.4367   9
   1  -4 -17 90.5692 95.4985   6
  -1   4  17 8.54956 71.3725   1
   1  -4 -17 50.2399 101.062   9
  -1   4  17-54.6879 82.0621   2
   1  -4 -17-125.402 116.352  10
  -1   4  16 207.171 88.5703   1
   1  -4 -16 42.8725 65.9426   6
   1  -4 -16 232.979 92.3854  10
   1  -4 -16 60.3314 98.2447   9
  -1   4  16 33.4034 88.9512   2
  -1   4  15-75.1953 108.258   2
   1  -4 -15 40.2075 99.4385   9
   1  -4 -15 12.6227 69.5580   6
  -1   4  15 110.419 78.5119   1
   1  -4 -15 49.0955 77.7725  10
  -1   4  14-16.6075 75.8033   2
   1  -4 -14-10.1924 79.7670   9
  -1   4  14-90.9730 70.6583   1
   1  -4 -14-47.5642 102.315   6
  -1   4  13 156.504 84.4780   2
   1  -4 -13 194.999 113.286   9
  -1   4  13 55.5902 56.1068   1
   1  -4 -13-32.6977 91.7463   6
  -1   4  12 206.566 31.6040   4
   1  -4 -12 70.4187 71.5239   9
  -1   4  12 100.173 69.7425   2
  -1   4  12 251.372 73.1387   1
   1  -4 -12 212.995 77.4349   6
  -1   4  11 544.119 53.8201   4
   1  -4 -11 587.161 118.811   6
   1  -4 -11 645.955 133.276   9
  -1   4  11 602.195 106.348   1
  -1   4  11 644.804 140.152   2
  -1   4  10-34.6600 41.7374  10
  -1   4  10-77.1940 78.2733   2
  -1   4  10 30.4129 24.4626   4
   1  -4 -10 50.2545 59.5951   6
  -1   4  10-34.1966 56.5114   1
   1  -4 -10-0.35334 63.6926   9
   1  -4  -9 1610.91 182.935   6
  -1   4   9 1791.57 154.230  10
  -1   4   9 1483.58 186.450   2
  -1   4   9 1721.79 100.603   4
   1  -4  -9 1690.13 152.486   1
  -1   4   9 1776.87 158.022   1
   1  -4  -9 1323.99 174.354   9
  -1   4   8 819.304 136.189   2
  -1   4   8 923.516 75.5418   4
  -1   4   8 883.197 107.011   1
  -1   4   8 946.196 106.594  10
   1  -4  -8 939.245 107.760   1
   1  -4  -8 1029.82 144.223   6
   1  -4  -8 820.856 139.043   9
  -1   4   7 1120.11 110.630  10
   1  -4  -7 1225.88 115.470   1
  -1   4   7 1188.94 144.884   2
  -1   4   7 1156.58 137.341   9
   1  -4  -7 1069.18 140.809   9
   1  -4  -7 993.890 133.731   6
  -1   4   7 946.358 106.156   1
  -1   4   6 1573.34 125.814  10
   1  -4  -6 1423.40 147.059   2
  -1   4   6 1649.49 160.255   2
  -1   4   6 1522.77 143.588   9
   1  -4  -6 1755.01 163.318   9
  -1   4   6 1648.96 159.993   6
   1  -4  -6 1642.97 162.607   6
   1  -4  -6 1834.99 131.418   1
  -1   4   6 1681.93 141.452   7
  -1   4   6 1352.50 119.385   1
   1  -4  -5 3537.72 225.122   9
  -1   4   5 4057.59 230.134   9
   1  -4  -5 3949.48 239.632   6
   1  -4  -5 3893.52 236.146   2
  -1   4   5 4242.83 241.867   6
  -1   4   5 3819.27 184.050   1
   1  -4  -5 3913.58 188.846   1
  -1   4   5 3736.63 239.740   2
  -1   4   5 3948.30 211.726   7
   1  -4  -4 3898.17 223.064   6
   1  -4  -4 3501.78 162.274   1
  -1   4   4 3723.17 216.620   6
  -1   4   4 3473.33 193.444   7
   1  -4  -4 3576.57 215.612   2
  -1   4   4 3192.08 212.335   2
   1  -4  -4 3746.82 213.591   9
   1  -4  -3 563.770 61.8616   1
  -1   4   3 550.461 44.8974   8
  -1   4   3 425.895 75.1991   6
   1  -4  -3 487.420 79.3839   6
   1  -4  -3 496.482 87.3970   9
  -1   4   3 569.930 93.5976   2
  -1   4   3 534.968 72.0593   7
   1  -4  -3 502.691 83.6870   2
  -1   4   2 100.635 46.8057   7
  -1   4   2 47.8160 42.2690   6
   1  -4  -2-3.72468 54.1343   6
  -1   4   2 71.4708 51.3646   2
   1  -4  -2 27.1129 44.6138   2
  -1   4   2 62.4859 18.7193   8
   1  -4  -1 19231.8 554.160   2
  -1   4   1 19636.5 536.057   6
  -1   4   1 19896.2 570.320   2
   1  -4  -1 19074.7 529.468   6
  -1   4   1 19670.7 499.081   7
  -1   4   0 554.725 74.5668   6
   1  -4   0 545.599 80.6646   6
  -1   4   0 525.149 62.8988   3
  -1   4   0 515.986 62.7996   7
   1  -4   0 451.530 75.2385   2
   1  -4   1 1657.28 131.597   2
  -1   4  -1 1859.79 127.540   6
  -1   4  -1 1794.51 100.833   3
  -1   4  -1 1909.24 132.213   4
   1  -4   1 1845.32 105.449   3
   1  -4   1 1859.71 126.885   6
  -1   4  -1 1792.94 100.527   7
  -1   4  -2 2530.75 109.366   7
  -1   4  -2 2398.38 124.961   3
  -1   4  -2 2308.89 157.706   4
   1  -4   2 2380.53 147.443   6
   1  -4   2 2519.27 128.663   3
  -1   4  -2 2651.10 148.478   6
   1  -4   3 2776.75 143.637   3
  -1   4  -3 2792.14 143.830   3
   1  -4   3 3147.33 171.788   1
  -1   4  -3 3020.61 171.113   4
  -1   4  -3 2805.38 104.683   7
  -1   4  -3 2935.81 160.949   6
   1  -4   4 3510.84 195.702   1
   1  -4   4 3148.03 167.767   3
  -1   4  -4 3526.46 189.843   4
  -1   4  -4 3271.65 174.932   6
  -1   4  -4 3361.30 171.923   3
  -1   4  -5 5180.84 239.894   4
   1  -4   5 5210.48 235.197   3
   1  -4   5 5436.08 258.938   1
  -1   4  -5 5234.43 280.583  10
  -1   4  -6 6240.15 269.799   4
  -1   4  -6 6107.60 291.474   1
   1  -4   6 6799.18 304.368   1
  -1   4  -6 6123.49 320.860  10
   1  -4   6 6880.50 295.193   3
   1  -4   7 5236.84 265.118   3
  -1   4  -7 5081.53 304.781  10
  -1   4  -7 4776.08 236.863   4
   1  -4   7 5498.29 280.545   1
   1  -4   8 37.6721 43.7895   3
  -1   4  -8 83.3741 78.6891  10
  -1   4  -8-49.6565 47.7627   4
   1  -4   8 14.2437 53.5342   1
  -1   4  -9 2314.78 167.230   4
  -1   4  -9 2592.72 236.704  10
   1  -4   9 2541.62 204.688   1
  -1   4 -10 2699.36 182.418   4
  -1   4 -10 2535.55 251.142  10
   1  -4  10 2757.55 223.347   1
   1  -4  11 337.423 88.9030   1
  -1   4 -11 339.355 68.3792   4
  -1   4 -11 498.605 125.124  10
   1  -4  12 329.053 87.9322   1
  -1   4 -12 396.385 116.937  10
  -1   4 -12 264.327 69.6413   4
  -1   4 -13 7155.53 461.058  10
  -1   4 -13 6552.29 300.738   4
   1  -4  13 6776.85 391.870   1
   1  -4  14 167.834 90.6065   1
  -1   4 -14 20.3860 40.4236   4
   1  -4  14 50.3399 21.2317   5
  -1   4 -14-9.63862 91.5569  10
  -1   4 -15 2182.85 176.562   4
  -1   4 -15 2050.85 264.072  10
   1  -4  15 2276.17 244.954   1
  -1   4 -16-17.0951 61.0202   6
   1  -4  16 25.4396 64.8225   1
  -1   4 -16 72.0905 54.7797   4
  -1   4 -16 128.183 93.4542  10
  -1   4 -17 19.7851 61.4241   6
  -1   4 -17-25.0368 106.780  10
  -1   4 -17-97.3138 67.5220   4
   1  -4  17-39.4353 74.4844   1
   1  -4  18 333.853 108.980   1
  -1   4 -18 291.185 109.000  10
  -1   4 -18 397.714 127.070   6
   1  -4  19 1712.38 249.132   1
  -1   4 -19 1654.90 224.485   6
  -1   4 -19 1352.81 256.465  10
  -1   4 -20 239.901 133.757  10
   1  -4  20 740.646 170.190   1
  -1   4 -20 369.862 124.178   6
   1  -4  21 2384.41 311.884   1
  -1   4 -21 2451.13 347.194  10
  -1   4 -22 376.300 163.546  10
   1  -4  22 534.945 163.898   1
  -1   4 -23 1442.50 295.135  10
   1  -3 -26 57.5879 94.9693   6
  -1   3  25 340.901 139.717   1
   1  -3 -25 301.946 138.850   6
   1  -3 -24-53.4248 101.692  10
  -1   3  24-34.9636 100.749   1
  -1   3  24 232.782 150.408   2
   1  -3 -24-36.6243 77.1585   6
   1  -3 -23 368.338 129.365  10
   1  -3 -23 524.987 163.088   6
  -1   3  23 870.109 235.888   2
  -1   3  23 345.899 128.994   1
  -1   3  22 2031.29 327.538   2
   1  -3 -22 1983.59 299.587  10
   1  -3 -22 1866.07 279.396   6
  -1   3  22 1648.27 244.937   1
  -1   3  21 476.937 168.174   2
   1  -3 -21 380.851 139.156   6
  -1   3  21 215.119 85.5925   1
   1  -3 -21 389.581 185.795   9
   1  -3 -21 851.221 202.087  10
   1  -3 -20 1580.26 313.170   9
   1  -3 -20 1266.74 221.922   6
  -1   3  20 1507.67 268.895   2
  -1   3  20 1211.57 213.967   1
   1  -3 -20 1487.65 246.378  10
  -1   3  19 1614.09 227.654   1
  -1   3  19 1911.86 290.279   2
   1  -3 -19 1757.73 298.588   9
   1  -3 -19 1844.29 255.307  10
   1  -3 -19 1850.67 257.148   6
  -1   3  18 1969.46 246.433   1
   1  -3 -18 1838.62 250.799  10
   1  -3 -18 2182.88 317.683   9
   1  -3 -18 2227.03 263.312   6
  -1   3  18 2450.48 320.162   2
   1  -3 -17 33.1176 68.6191   6
  -1   3  17-52.1502 87.9774   2
   1  -3 -17 4.64742 83.7001  10
  -1   3  17 70.6088 75.2077   1
   1  -3 -17 145.900 138.004   9
   1  -3 -16 12.2173 91.2391   9
   1  -3 -16-116.884 89.1598   6
  -1   3  16-114.363 83.8948   1
  -1   3  16-74.6768 85.4267   2
   1  -3 -16-79.5257 82.3970  10
  -1   3  15 14.2057 66.0519   1
   1  -3 -15 39.1090 70.2478   6
  -1   3  15 23.8689 83.8151   2
   1  -3 -15 21.0365 77.4435  10
   1  -3 -15 103.730 105.524   9
  -1   3  14 45.6430 57.6320   1
   1  -3 -14-19.6033 91.3226   9
   1  -3 -14 39.2230 68.1753  10
   1  -3 -14-42.7430 91.1590   6
  -1   3  14 39.9553 81.8963   2
  -1   3  13 91.6510 99.5751   2
   1  -3 -13 123.533 78.9949  10
   1  -3 -13 83.4096 60.1894   6
   1  -3 -13 43.9165 74.8639   9
  -1   3  13 180.206 81.6113   1
   1  -3 -12 482.195 111.255  10
   1  -3 -12 444.532 121.584   9
   1  -3 -12 470.113 123.352   6
  -1   3  12 553.347 108.897   1
  -1   3  12 467.801 118.884   2
   1  -3 -11 700.580 109.014  10
  -1   3  11 725.736 138.980   2
   1  -3 -11 473.508 104.032   6
   1  -3 -11 551.845 128.237   9
  -1   3  11 594.698 104.685   1
   1  -3 -10 900.969 137.628   6
   1  -3 -10 811.689 123.438  10
  -1   3  10 767.442 110.037  10
  -1   3  10 694.983 49.7112   4
   1  -3 -10 760.745 136.539   9
  -1   3  10 880.071 140.458   2
  -1   3  10 773.490 115.505   1
  -1   3   9 224.549 79.2342   2
  -1   3   9 176.988 28.5819   4
   1  -3  -9 173.122 83.6243   6
   1  -3  -9 286.999 66.4799   1
  -1   3   9 244.461 66.8296  10
  -1   3   9 123.304 55.1803   1
   1  -3  -9 220.867 74.6204  10
   1  -3  -9 141.665 80.7510   9
   1  -3  -8 9685.45 428.318   6
  -1   3   8 9812.81 371.191  10
  -1   3   8 8808.78 362.541   1
  -1   3   8 9391.45 254.168   4
   1  -3  -8 9427.45 377.688  10
   1  -3  -8 9293.67 433.121   9
  -1   3   8 9965.66 441.687   2
  -1   3   8 10045.6 380.415   7
   1  -3  -8 10369.0 376.439   1
  -1   3   8 9299.84 416.330   9
   1  -3  -7 4210.91 274.036   9
   1  -3  -7 4489.30 270.301   6
  -1   3   7 4670.44 238.135   7
  -1   3   7 4673.43 227.315  10
  -1   3   7 4761.98 269.412   9
   1  -3  -7 4592.13 223.574   1
  -1   3   7 4576.91 230.924   1
   1  -3  -7 4130.43 262.625   2
  -1   3   7 4589.14 271.574   6
  -1   3   7 4238.13 272.555   2
  -1   3   7 4404.70 155.080   4
   1  -3  -6 755.251 83.2971   1
   1  -3  -6 608.808 106.457   9
  -1   3   6 823.623 93.3120   7
  -1   3   6 850.480 110.086   9
  -1   3   6 807.360 116.941   6
   1  -3  -6 849.791 114.819   2
  -1   3   6 841.369 92.4380   1
   1  -3  -6 678.239 110.222   6
  -1   3   6 726.205 83.4135  10
  -1   3   6 705.572 60.2448   4
  -1   3   6 636.117 105.305   2
  -1   3   5 4497.32 216.272   7
  -1   3   5 4245.55 198.317   1
   1  -3  -5 4302.96 243.024   2
  -1   3   5 4715.34 235.727   9
  -1   3   5 4528.18 251.359   6
   1  -3  -5 4402.57 199.108   1
  -1   3   5 4389.60 193.299  10
  -1   3   5 4667.10 247.319   2
   1  -3  -5 4430.46 247.628   6
   1  -3  -5 4642.72 241.016   9
  -1   3   4 5896.39 265.515   6
   1  -3  -4 5526.97 261.137   2
  -1   3   4 5159.65 207.170   1
  -1   3   4 5464.76 246.428   9
  -1   3   4 5707.03 261.142   2
   1  -3  -4 5121.81 250.182   6
   1  -3  -4 5391.52 250.249   9
  -1   3   4 5908.88 238.773   7
   1  -3  -4 5804.26 212.670   1
  -1   3   3 13474.6 409.726   6
   1  -3  -3 11877.2 341.252   1
   1  -3  -3 13199.0 418.254   2
  -1   3   3 13573.5 384.748   7
   1  -3  -3 13430.3 408.794   6
   1  -3  -3 13098.0 401.811   9
  -1   3   3 11882.5 400.378   2
   1  -3  -2 187.233 56.9140   6
   1  -3  -2 223.879 57.3876   2
  -1   3   2 110.577 53.0690   2
  -1   3   2 209.391 48.3593   7
  -1   3   2 162.891 20.6833   8
  -1   3   2 241.222 52.0851   6
  -1   3   1 17077.8 439.393   6
  -1   3   1 15459.5 454.010   2
   1  -3  -1 15381.2 449.589   2
  -1   3   1 16410.6 417.970   4
  -1   3   1 16438.3 413.011   7
   1  -3  -1 15210.6 425.812   6
  -1   3   0-11.2760 30.5718   3
   1  -3   0 40.7147 35.3093   6
  -1   3   0 112.884 47.0078   4
  -1   3   0 37.2406 28.3441   7
  -1   3   0-33.7080 48.2266   2
  -1   3   0 102.823 34.5482   6
   1  -3   0 54.4658 40.9201   2
  -1   3  -1 27131.0 582.648   7
   1  -3   1 27622.6 627.453   6
  -1   3  -1 27627.3 628.311   6
  -1   3  -1 27172.8 581.746   3
   1  -3   1 26952.4 587.349   3
  -1   3  -1 29192.9 646.512   4
  -1   3  -2 3617.13 166.192   4
   1  -3   2 3424.11 154.117   6
  -1   3  -2 3124.05 132.603   3
  -1   3  -2 3578.43 151.926   6
   1  -3   2 3212.40 133.674   3
  -1   3  -2 3369.68 112.661   7
   1  -3   3 15018.6 420.483   1
  -1   3  -3 15266.3 414.271   4
  -1   3  -3 13880.1 373.692   3
   1  -3   3 14469.5 383.278   3
  -1   3  -3 13911.7 387.422   6
  -1   3  -4 6745.94 289.077  10
  -1   3  -4 7177.65 260.734   4
   1  -3   4 7107.28 256.079   3
   1  -3   4 7289.78 280.293   1
   1  -3   5 34.9193 38.9689   3
  -1   3  -5 29.4482 57.9739  10
   1  -3   5 34.2004 44.8380   1
  -1   3  -5 100.872 48.5135   1
  -1   3  -5-7.41935 43.2371   4
  -1   3  -6-12.4583 38.5847   4
  -1   3  -6-21.0051 41.3217   1
   1  -3   6-37.1548 45.1581   3
  -1   3  -6-78.3619 64.9361  10
   1  -3   6-16.7430 47.0553   1
  -1   3  -7-59.1818 46.7047   1
   1  -3   7-25.6117 43.9794   3
  -1   3  -7 53.2126 63.3362  10
   1  -3   7 13.7891 49.3385   1
  -1   3  -7 24.2182 36.0206   4
   1  -3   8 4299.56 247.609   3
  -1   3  -8 3817.22 268.322  10
   1  -3   8 4212.69 247.149   1
  -1   3  -8 3964.83 200.464   4
  -1   3  -9 508.508 72.5407   4
   1  -3   9 337.582 34.5352   5
  -1   3  -9 423.837 107.607  10
   1  -3   9 213.806 28.6468   7
   1  -3   9 417.114 89.3545   1
  -1   3 -10 3976.03 295.611  10
   1  -3  10 3868.79 256.455   1
  -1   3 -10 3949.28 202.519   4
   1  -3  11 739.721 120.612   1
  -1   3 -11 735.416 92.0915   4
   1  -3  11 568.863 54.2823   7
  -1   3 -11 572.404 131.369  10
  -1   3 -12 3140.63 190.354   4
   1  -3  12 2451.43 126.773   7
   1  -3  12 3426.90 262.862   1
  -1   3 -12 3251.00 288.153  10
  -1   3 -13 76.8248 77.6035  10
   1  -3  13 46.4310 60.8583   1
  -1   3 -13 43.9632 41.8265   4
   1  -3  13 43.3204 29.6560   7
   1  -3  14 2170.13 222.130   1
  -1   3 -14 2217.68 221.087   6
  -1   3 -14 2253.95 165.902   4
  -1   3 -14 1687.66 225.360  10
   1  -3  14 1734.72 118.608   7
  -1   3 -15 18.5947 53.6288   6
  -1   3 -15-77.7940 107.107  10
   1  -3  15 90.2661 67.7532   1
  -1   3 -15-43.1250 51.0891   4
  -1   3 -16-40.2335 89.8098  10
   1  -3  16-47.5720 64.2335   1
  -1   3 -16-44.5279 39.0276   4
  -1   3 -16 9.73307 60.1481   6
  -1   3 -17 73.2726 68.5657   6
  -1   3 -17 74.6178 98.8320  10
   1  -3  17 134.645 76.2420   1
   1  -3  18 191.991 101.247   1
  -1   3 -18 32.8735 58.0302   6
  -1   3 -18 353.542 137.533  10
   1  -3  19 2427.84 291.903   1
  -1   3 -19 2530.57 272.704   6
  -1   3 -19 2452.28 326.278  10
  -1   3 -20 1146.76 242.133  10
  -1   3 -20 809.568 168.595   6
   1  -3  20 707.359 171.075   1
  -1   3 -21 1836.75 295.247  10
   1  -3  21 1307.06 236.550   1
  -1   3 -21 1588.61 233.617   6
  -1   3 -22 989.570 235.722  10
   1  -3  22 920.833 195.870   1
  -1   3 -23 1436.65 289.469  10
   1  -3  23 1438.01 264.724   1
  -1   3 -24-192.484 118.326  10
   1  -2 -26 616.196 205.652  10
   1  -2 -26 328.459 131.849   6
   1  -2 -25 739.308 185.400   6
   1  -2 -25 894.338 240.311  10
  -1   2  24 225.166 116.121   1
   1  -2 -24 386.779 172.162  10
  -1   2  24 762.142 227.040   2
   1  -2 -24 451.303 154.945   6
  -1   2  23 594.182 183.269   1
  -1   2  23 1087.40 241.056   2
   1  -2 -23 685.644 196.606  10
   1  -2 -23 1002.73 210.082   6
  -1   2  22 42.9965 118.630   2
   1  -2 -22-125.230 128.497  10
  -1   2  22 10.5684 92.2455   1
   1  -2 -22 146.644 110.175   6
   1  -2 -21 1449.51 233.538   6
  -1   2  21 1571.57 283.452   2
  -1   2  21 1213.25 213.802   1
   1  -2 -21 1472.74 253.230  10
   1  -2 -20 2886.56 324.455   6
   1  -2 -20 2289.34 304.882  10
  -1   2  20 2891.68 365.021   2
  -1   2  20 2596.94 303.095   1
  -1   2  19 1418.94 208.596   1
  -1   2  19 1611.24 268.885   2
   1  -2 -19 1488.66 233.129   6
   1  -2 -19 1279.98 219.738  10
  -1   2  18 1615.05 214.730   1
   1  -2 -18 1750.41 257.040  10
  -1   2  18 1928.01 285.710   2
   1  -2 -18 1750.00 240.032   6
   1  -2 -18 1527.68 272.326   9
   1  -2 -17 236.876 92.5535   6
  -1   2  17 102.413 68.3107   1
   1  -2 -17 32.9536 90.8389  10
  -1   2  17 18.8009 106.164   2
   1  -2 -17 37.5498 87.0044   9
  -1   2  16 577.044 133.496   1
   1  -2 -16 691.533 146.051   6
  -1   2  16 495.897 148.461   2
   1  -2 -16 568.244 155.707   9
   1  -2 -16 526.681 137.429  10
   1  -2 -15 3164.65 338.118   9
  -1   2  15 3014.81 267.219   1
  -1   2  15 3394.21 333.683   2
   1  -2 -15 2840.71 283.814  10
   1  -2 -15 2842.64 275.902   6
   1  -2 -14 158.248 104.712   9
  -1   2  14-57.3086 100.233   2
  -1   2  14 103.751 67.9737   1
   1  -2 -14 19.6712 75.2631  10
   1  -2 -14 70.0328 64.5604   6
  -1   2  13 2629.42 269.678   2
   1  -2 -13 2305.54 230.060   6
   1  -2 -13 2444.44 273.219   9
   1  -2 -13 2220.94 229.656  10
  -1   2  13 2314.08 216.218   1
   1  -2 -12 1162.97 189.440   9
   1  -2 -12 927.924 149.377  10
  -1   2  12 1136.88 175.596   2
   1  -2 -12 1092.84 158.331   6
  -1   2  12 967.513 135.771   1
  -1   2  11 110.534 60.8776   1
   1  -2 -11-4.03042 97.4548   9
  -1   2  11 55.5682 64.1238   2
   1  -2 -11-89.6482 75.5459  10
   1  -2 -11 30.2555 61.1072   6
  -1   2  10 141.637 64.2398   1
   1  -2 -10 135.292 77.2472  10
   1  -2 -10 201.072 75.5859   6
   1  -2 -10 30.9940 79.7817   9
  -1   2  10 55.3945 70.8111   2
  -1   2  10 126.519 53.9122  10
   1  -2  -9 6381.52 300.468   1
   1  -2  -9 5920.22 306.222  10
   1  -2  -9 6125.39 337.988   6
  -1   2   9 6194.73 286.222   7
   1  -2  -9 5598.16 344.835   9
  -1   2   9 6082.25 352.097   2
  -1   2   9 5564.12 291.558   1
  -1   2   9 6682.08 309.150  10
  -1   2   8 378.127 68.8490   7
   1  -2  -8 382.325 92.4826   6
   1  -2  -8 360.450 92.0906   9
   1  -2  -8 367.276 72.0339  10
   1  -2  -8 482.503 82.3199   1
  -1   2   8 423.102 94.2180   6
  -1   2   8 489.048 78.5054  10
  -1   2   8 424.318 102.199   2
  -1   2   8 371.211 84.8395   9
  -1   2   8 337.301 75.0534   1
   1  -2  -7 1317.40 127.559  10
   1  -2  -7 1279.30 147.426   9
  -1   2   7 1308.26 62.6827   4
   1  -2  -7 1629.59 161.822   6
  -1   2   7 1631.32 129.272   7
  -1   2   7 1583.00 150.048   9
  -1   2   7 1447.89 158.081   2
  -1   2   7 1592.56 160.613   6
  -1   2   7 1402.19 124.557  10
  -1   2   7 1498.22 130.085   1
   1  -2  -7 1582.30 129.831   1
   1  -2  -6 6534.27 266.952  10
   1  -2  -6 6337.94 257.776   1
  -1   2   6 6382.02 306.315   2
  -1   2   6 6026.34 260.480   1
  -1   2   6 7040.82 320.242   6
   1  -2  -6 6651.51 308.479   6
  -1   2   6 6978.80 271.830   7
   1  -2  -6 6059.09 299.943   9
  -1   2   6 6339.07 256.922  10
  -1   2   6 6941.96 303.107   9
  -1   2   6 6573.49 176.997   4
   1  -2  -5 6064.59 277.364   2
   1  -2  -5 5372.99 265.361   9
   1  -2  -5 6468.84 244.925   1
  -1   2   5 5849.21 274.285   2
  -1   2   5 6017.24 240.402   1
  -1   2   5 6354.71 272.964   9
  -1   2   5 6445.55 234.780  10
  -1   2   5 6439.45 247.567   7
   1  -2  -5 6529.60 240.647  10
   1  -2  -5 6052.94 273.046   6
  -1   2   5 6399.23 176.672   4
  -1   2   5 6046.76 279.562   6
   1  -2  -4 3828.74 199.202   2
  -1   2   4 3820.92 160.516  10
  -1   2   4 3984.82 210.775   6
   1  -2  -4 3871.45 171.979   1
   1  -2  -4 4142.67 199.943   9
   1  -2  -4 3925.32 209.330   6
  -1   2   4 3791.07 192.457   9
  -1   2   4 4260.64 136.310   4
  -1   2   4 4001.30 173.850   1
  -1   2   4 4309.81 187.295   7
  -1   2   4 3611.90 201.760   2
  -1   2   3 13330.7 385.596   6
   1  -2  -3 12993.0 381.188   6
   1  -2  -3 12768.6 334.625   1
   1  -2  -3 11356.5 366.068   2
   1  -2  -3 11596.2 356.464   9
  -1   2   3 13194.1 356.227   7
  -1   2   3 12743.3 303.307   4
  -1   2   3 10743.3 319.467   1
  -1   2   3 12762.5 362.815   9
  -1   2   3 11890.5 368.921   2
  -1   2   2 2302.69 101.259   4
  -1   2   2 2054.54 123.216   2
  -1   2   2 2173.42 127.317   6
   1  -2  -2 2011.48 121.004   6
   1  -2  -2 2020.07 101.594   1
   1  -2  -2 1930.79 121.980   2
  -1   2   2 2340.04 114.796   7
   1  -2  -2 2147.69 112.933   7
   1  -2  -2 2007.47 119.268   9
  -1   2   1-28.8230 35.9899   2
  -1   2   1-5.82102 21.3078   7
   1  -2  -1-3.67185 29.9428   2
  -1   2   1 8.55972 25.9216   4
   1  -2  -1-19.9424 24.6409   7
   1  -2  -1 16.2738 26.9177   6
  -1   2   1 8.18509 28.2835   6
   1  -2   0 2098.79 100.589   6
  -1   2   0 1803.60 111.803   2
   1  -2   0 1996.89 112.366   2
   1  -2   0 1894.00 86.8212   7
  -1   2   0 2094.68 102.081   4
  -1   2   0 1962.42 89.6393   7
  -1   2   0 1953.33 97.8896   6
  -1   2  -1 3.70609 16.8046   3
  -1   2  -1 25.4315 16.8989   7
  -1   2  -1 15.7072 24.8801   4
   1  -2   1 37.1649 17.8528   7
   1  -2   1 26.9387 22.4527   4
   1  -2   1 1.49297 21.0319   6
  -1   2  -1 10.5580 20.4116   6
   1  -2   1 41.9074 17.8663   3
  -1   2  -2 24592.9 535.008   3
  -1   2  -2 25086.4 547.511   6
  -1   2  -2 26716.9 579.831   4
   1  -2   2 23979.0 536.422   3
   1  -2   2 26944.9 573.846   4
   1  -2   3 5438.18 193.077   3
   1  -2   3 6540.85 230.250   1
   1  -2   3 6243.34 204.599   4
  -1   2  -3 5817.93 206.631   4
  -1   2  -3 5156.04 222.825  10
  -1   2  -4 38.6403 33.8976   1
  -1   2  -4 64.2831 33.4158   4
   1  -2   4 52.2450 41.6550   1
   1  -2   4 162.515 43.2040   4
  -1   2  -4 35.8276 44.0498  10
  -1   2  -5 2252.74 126.600   4
  -1   2  -5 2552.50 157.127   1
   1  -2   5 2453.09 165.889  10
  -1   2  -5 2097.91 160.883  10
   1  -2   5 2639.13 156.949   1
   1  -2   6-12.1439 38.5420  10
  -1   2  -6-37.6968 62.0632  10
   1  -2   6 18.9277 45.1745   1
  -1   2  -6 7.82022 32.0350   4
  -1   2  -6-0.05569 36.5989   1
   1  -2   7 6676.63 308.115  10
  -1   2  -7 6292.56 283.418   1
   1  -2   7 6130.84 278.391   1
  -1   2  -7 5756.31 217.696   4
  -1   2  -7 5531.99 300.237  10
   1  -2   8 695.585 52.2604   7
  -1   2  -8 604.557 71.1987   4
  -1   2  -8 567.318 113.264  10
   1  -2   8 802.087 109.138   1
   1  -2   9 3163.92 130.628   7
  -1   2  -9 3479.01 176.188   4
   1  -2   9 3561.79 233.671   1
  -1   2  -9 3583.32 264.418  10
  -1   2 -10 57.9729 39.3068   4
   1  -2  10 129.104 36.6218   7
  -1   2 -10-22.5582 67.8801  10
   1  -2  10-33.5509 64.0211   1
  -1   2 -11 298.339 93.7985  10
  -1   2 -11 371.580 60.4588   4
   1  -2  11 263.050 50.1205   7
   1  -2  11 482.237 100.594   1
  -1   2 -12 123.355 83.6628  10
  -1   2 -12 61.6424 58.4257   6
  -1   2 -12 113.905 42.7937   4
   1  -2  12 180.824 47.7737   7
   1  -2  12 190.694 76.3769   1
  -1   2 -13 681.026 139.485  10
  -1   2 -13 669.026 120.480   6
  -1   2 -13 803.350 92.3336   4
   1  -2  13 1010.28 150.932   1
   1  -2  13 863.968 87.3570   7
  -1   2 -14 46.2032 37.6453   4
  -1   2 -14-104.601 99.3488  10
   1  -2  14 3.76393 27.5200   7
  -1   2 -14 6.64015 53.8300   6
   1  -2  14 27.0676 61.8648   1
  -1   2 -15 424.636 108.559   6
   1  -2  15 275.582 81.5642   1
   1  -2  15 216.013 54.0143   7
  -1   2 -15 162.363 45.8055   4
  -1   2 -15 282.811 121.592  10
   1  -2  16 68.7825 80.9934   1
  -1   2 -16 49.4456 65.3662   6
  -1   2 -16 10.2079 73.9725  10
  -1   2 -16 16.7783 31.5938   4
  -1   2 -17 187.718 95.7374  10
  -1   2 -17 321.403 106.305   6
   1  -2  17 303.130 110.484   1
   1  -2  18 1546.85 217.777   1
  -1   2 -18 1768.32 220.389   6
  -1   2 -18 1853.89 273.506  10
  -1   2 -19 251.594 142.782  10
   1  -2  19 5.65558 71.0271   1
  -1   2 -19 66.4316 95.6142   6
  -1   2 -20 4800.53 387.201   6
  -1   2 -20 5103.18 472.323  10
   1  -2  20 4250.70 389.621   1
  -1   2 -21 459.425 133.415   6
   1  -2  21 597.048 164.862   1
  -1   2 -21 289.724 147.184  10
   1  -2  22 955.099 199.371   1
  -1   2 -22 1274.17 212.529   6
  -1   2 -22 1106.68 241.909  10
  -1   2 -23 291.311 162.963  10
   1  -2  23 55.0126 87.2599   1
  -1   2 -24-181.204 153.224  10
   1  -1 -26 1315.86 295.218  10
   1  -1 -26 1582.39 277.432   6
   1  -1 -25 300.918 152.078  10
   1  -1 -25-29.7890 87.1421   6
  -1   1  24 676.010 193.956   2
   1  -1 -24 678.479 206.398  10
  -1   1  24 473.967 169.302   1
   1  -1 -24 391.587 129.567   6
  -1   1  23 157.953 100.643   1
   1  -1 -23-40.8284 102.756   6
   1  -1 -23-162.718 118.513  10
  -1   1  23-85.8223 154.638   2
  -1   1  22 251.653 116.219   1
  -1   1  22 60.4497 106.235   2
   1  -1 -22 66.6800 93.1165  10
   1  -1 -22 238.956 119.777   6
  -1   1  21 1242.36 256.609   2
   1  -1 -21 709.276 187.517  10
  -1   1  21 1188.81 209.963   1
   1  -1 -21 1201.09 208.708   6
   1  -1 -20 292.933 131.191  10
   1  -1 -20 309.507 113.675   6
  -1   1  20 156.178 92.1702   1
  -1   1  20 332.800 131.820   2
   1  -1 -19 2580.28 309.225  10
  -1   1  19 2950.98 359.223   2
   1  -1 -19 2892.31 311.235   6
  -1   1  19 2942.61 304.144   1
   1  -1 -18 365.527 120.176   6
  -1   1  18 229.259 101.165   2
   1  -1 -18 159.654 84.5590  10
  -1   1  18 374.587 120.969   1
   1  -1 -17 270.370 93.6240   6
  -1   1  17 535.797 135.305   1
  -1   1  17 233.082 92.9434   2
   1  -1 -17 384.971 118.497  10
  -1   1  16 92.4212 70.7871   1
   1  -1 -16-16.7447 90.3292  10
   1  -1 -16-64.8811 106.375   9
   1  -1 -16 77.1139 78.8605   6
  -1   1  16 297.145 129.170   2
  -1   1  15 3018.24 323.685   2
   1  -1 -15 2767.63 320.241   9
   1  -1 -15 2710.38 272.868   6
  -1   1  15 3138.38 270.803   1
   1  -1 -15 3098.88 290.810  10
  -1   1  14 486.611 108.919   1
   1  -1 -14 380.520 136.691   9
  -1   1  14 426.887 132.177   2
   1  -1 -14 532.870 126.470  10
   1  -1 -14 368.459 107.869   6
  -1   1  13 4926.61 316.787   1
   1  -1 -13 4435.62 327.278   6
  -1   1  13 4971.28 374.118   2
   1  -1 -13 4300.32 364.162   9
   1  -1 -13 5195.12 347.626  10
   1  -1 -12 161.996 88.1020   9
   1  -1 -12 106.678 69.7890  10
  -1   1  12 98.5678 84.2314   2
   1  -1 -12 98.0062 67.3739   6
  -1   1  12 164.144 68.3832   1
  -1   1  11 6796.33 345.423   1
   1  -1 -11 7038.71 369.870  10
   1  -1 -11 6257.73 372.208   6
   1  -1 -11 7223.03 427.339   9
  -1   1  10 5937.66 279.771   7
  -1   1  10 5868.72 312.133  10
   1  -1 -10 5799.53 336.125   6
  -1   1  10 6163.55 314.374   1
   1  -1 -10 6120.78 377.342   9
   1  -1 -10 5548.65 318.928  10
   1  -1  -9 731.670 108.238  10
  -1   1   9 448.317 100.870   2
  -1   1   9 722.373 100.006  10
   1  -1  -9 438.871 106.109   9
   1  -1  -9 504.027 100.956   6
  -1   1   9 696.582 102.243   1
  -1   1   9 652.516 90.1918   7
  -1   1   8 5219.37 255.794  10
  -1   1   8 5137.59 303.463   2
  -1   1   8 5110.96 256.868   1
   1  -1  -8 5476.95 260.910   1
   1  -1  -8 4770.00 260.553  10
  -1   1   8 5361.94 301.726   9
  -1   1   8 4949.10 232.778   7
   1  -1  -8 4846.72 280.416   6
   1  -1  -8 5120.95 312.354   9
  -1   1   7 91.6028 56.0342   2
  -1   1   7 274.974 53.7404  10
   1  -1  -7 165.001 74.5805   9
  -1   1   7 273.042 54.6626   7
   1  -1  -7 236.432 56.2775   1
  -1   1   7 207.241 67.8937   9
   1  -1  -7 211.910 55.7102  10
   1  -1  -7 216.218 76.1808   6
  -1   1   7 231.728 61.8887   1
  -1   1   6 6769.63 306.346   9
  -1   1   6 7279.20 259.737   7
   1  -1  -6 6005.62 299.827   9
   1  -1  -6 7317.03 280.436  10
   1  -1  -6 6625.59 309.832   6
  -1   1   6 7053.29 315.680   2
  -1   1   6 7035.59 271.988  10
  -1   1   6 6536.08 267.870   1
   1  -1  -6 7426.30 279.258   1
  -1   1   6 6645.83 305.974   6
  -1   1   5 197.601 66.9616   2
   1  -1  -5 381.683 62.0667  10
  -1   1   5 365.820 68.9413   9
  -1   1   5 380.292 65.7631   1
   1  -1  -5 359.088 56.3185   1
   1  -1  -5 347.479 75.1498   9
  -1   1   5 443.031 58.0040   7
   1  -1  -5 283.120 77.1247   6
  -1   1   5 347.413 57.2228  10
  -1   1   5 371.876 69.4890   6
  -1   1   4 31522.7 735.091   2
   1  -1  -4 31578.9 680.921  10
   1  -1  -4 30968.0 695.068   1
   1  -1  -4 31339.3 681.307   7
   1  -1  -4 27415.3 714.830   2
  -1   1   4 29059.7 668.809  10
   1  -1  -4 27550.6 725.039   6
  -1   1   4 30592.9 723.277   9
   1  -1  -4 30498.0 730.996   9
  -1   1   4 31631.3 685.326   7
  -1   1   4 29868.4 691.110   1
  -1   1   4 32890.2 756.999   6
   1  -1  -3 80.7940 37.7853   2
  -1   1   3 62.6122 18.7999   4
  -1   1   3 5.79511 22.2584  10
  -1   1   3 50.2423 40.0302   2
  -1   1   3 29.9966 41.4928   6
  -1   1   3 48.0331 25.8532   1
   1  -1  -3 59.0189 39.8771   6
   1  -1  -3 35.2239 24.6167   1
  -1   1   3 97.3014 33.4870   7
   1  -1  -3 39.4634 26.3613  10
   1  -1  -3 60.5915 29.2859   7
   1  -1  -3 33.6353 37.5462   9
  -1   1   3 16.6006 26.4927   9
   1  -1  -2 2569.81 123.991   6
   1  -1  -2 2333.08 119.990   2
  -1   1   2 2569.50 89.8613   4
  -1   1   2 2675.82 110.751   7
  -1   1   2 2530.85 111.454   9
   1  -1  -2 2520.53 109.494   1
  -1   1   2 2309.77 107.499   1
   1  -1  -2 2482.69 108.598   7
  -1   1   2 2328.12 120.749   6
   1  -1  -2 2444.28 111.262   9
  -1   1   2 2692.49 121.963   2
   1  -1  -2 2609.84 86.8581   4
   1  -1   2 1596.05 92.7467  10
   1  -1   2 1850.70 94.7040   1
  -1   1  -2 1712.34 84.7782   4
   1  -1   2 1529.73 80.9534   4
  -1   1  -2 1610.54 95.7789  10
  -1   1  -3 5340.97 177.989   4
   1  -1   3 5735.09 215.017  10
  -1   1  -3 6167.56 208.346   1
   1  -1   3 5389.84 175.785   4
   1  -1   3 5920.23 206.536   1
  -1   1  -3 5127.02 204.990  10
  -1   1  -4 3349.06 177.216  10
  -1   1  -4 4059.78 176.623   1
   1  -1   4 3430.97 136.700   4
  -1   1  -4 3626.60 141.765   4
   1  -1   4 3642.92 184.550  10
   1  -1   4 3811.72 173.169   1
   1  -1   5 6182.29 196.619   4
   1  -1   5 6280.71 268.455  10
  -1   1  -5 6827.28 253.984   1
   1  -1   5 6935.61 256.764   1
  -1   1  -5 5799.82 201.241   4
  -1   1  -5 6369.76 276.107  10
  -1   1  -6 8072.17 307.886   1
  -1   1  -6 7508.64 244.550   4
   1  -1   6 8088.55 236.177   4
   1  -1   6 8291.31 377.162   9
   1  -1   6 8442.74 311.510   1
  -1   1  -6 8068.50 334.542  10
   1  -1   6 8053.92 329.195  10
   1  -1   7 8308.42 232.692   7
  -1   1  -7 8282.77 329.242   1
   1  -1   7 8949.13 365.530  10
  -1   1  -7 7834.43 360.075  10
   1  -1   7 8396.42 330.645   1
  -1   1  -7 8073.80 259.274   4
   1  -1   7 8152.54 242.595   4
   1  -1   7 8874.91 412.574   9
   1  -1   8 14823.4 571.136   9
  -1   1  -8 12490.8 487.362  10
   1  -1   8 11859.4 326.858   7
   1  -1   8 12766.1 476.600  10
   1  -1   8 12554.1 331.576   4
  -1   1  -8 13039.1 360.503   4
   1  -1   8 12555.9 445.721   1
  -1   1  -8 12314.9 440.047   1
  -1   1  -9 1071.77 150.347  10
  -1   1  -9 1322.06 99.8868   4
   1  -1   9 1122.45 129.296   1
  -1   1  -9 1071.55 129.112   6
   1  -1   9 1140.22 82.7509   7
   1  -1  10 13650.1 382.202   7
  -1   1 -10 12911.0 391.793   4
   1  -1  10 13578.8 506.753   1
  -1   1 -10 13973.9 498.213   6
  -1   1 -10 13937.2 566.016  10
   1  -1  11 2783.32 152.709   7
  -1   1 -11 2870.56 214.851   6
  -1   1 -11 2831.00 251.708  10
  -1   1 -11 2800.42 156.334   4
   1  -1  11 2839.43 221.718   1
  -1   1 -12-34.3175 78.0823  10
   1  -1  12 16.3163 31.6632   7
  -1   1 -12 48.4287 35.8702   4
  -1   1 -12 61.5531 69.8520   6
   1  -1  12 14.3213 74.0244   1
   1  -1  13 37.7904 56.3965   1
  -1   1 -13 105.918 89.7750  10
  -1   1 -13-17.3877 54.6747   6
   1  -1  13-13.6414 32.2944   7
  -1   1 -13-7.49781 29.6089   4
  -1   1 -14 1735.95 218.085  10
   1  -1  14 1297.10 121.594   7
   1  -1  14 1558.16 179.727   1
  -1   1 -14 1708.69 188.134   6
  -1   1 -14 1336.70 107.905   4
  -1   1 -15-35.7328 65.4300   6
   1  -1  15 67.7956 65.5893   1
   1  -1  15 31.6557 40.6084   7
  -1   1 -15-25.4622 85.4983  10
  -1   1 -16-30.3992 79.3975  10
   1  -1  16 34.8646 65.8119   1
  -1   1 -16-35.5404 76.9163   6
  -1   1 -17 1036.45 173.470   6
   1  -1  17 1060.24 171.811   1
  -1   1 -17 766.733 182.244  10
  -1   1 -18 194.643 107.044  10
   1  -1  18 123.605 87.3136   1
  -1   1 -18 156.674 99.0946   6
  -1   1 -19 2190.73 299.239  10
  -1   1 -19 2226.39 255.230   6
   1  -1  19 1825.82 241.595   1
  -1   1 -20 392.818 128.733   6
   1  -1  20 612.617 155.325   1
  -1   1 -20 334.604 143.942  10
  -1   1 -21 2728.60 359.608  10
   1  -1  21 2601.63 301.145   1
  -1   1 -21 2843.18 304.066   6
   1  -1  22 278.327 115.672   1
  -1   1 -22 406.039 153.358  10
  -1   1 -22 526.344 145.897   6
  -1   1 -23 163.810 99.3427   6
   1  -1  23 214.972 110.535   1
  -1   1 -23 173.171 134.618  10
   1  -1  24 6.09113 88.8206   1
  -1   1 -24-82.0415 111.966  10
  -1   1 -25 113.484 139.749  10
   1   0 -26 1006.45 262.494  10
   1   0 -25 643.892 204.662  10
   1   0 -25 565.754 167.019   6
  -1   0  24 334.373 146.039   1
   1   0 -24 402.918 137.702   6
   1   0 -24 46.3234 106.182  10
  -1   0  24 468.168 168.931   2
  -1   0  23 17.5081 99.9989   2
  -1   0  23-45.0150 95.8734   1
   1   0 -23 39.5968 111.170  10
   1   0 -23 42.2564 106.184   6
  -1   0  22-172.344 125.906   1
  -1   0  22 122.938 106.650   2
   1   0 -22 102.324 113.318  10
   1   0 -22-109.598 119.140   6
  -1   0  21 413.544 161.930   2
   1   0 -21 329.375 118.777   6
  -1   0  21 335.641 129.064   1
   1   0 -21 330.564 141.784  10
  -1   0  20 99.2894 99.4197   2
   1   0 -20-43.9887 76.9608   6
  -1   0  20 50.3177 67.8183   1
   1   0 -20-170.139 147.707  10
   1   0 -19 1342.53 218.581   6
   1   0 -19 1264.77 231.518  10
  -1   0  19 1426.16 218.962   1
  -1   0  19 1606.50 262.144   2
  -1   0  18 158.108 84.1226   1
   1   0 -18 138.584 86.9477   6
   1   0 -18 93.1230 89.1099  10
   1   0 -17 28.0281 74.0802   6
   1   0 -17 108.805 74.8627  10
  -1   0  17 93.6668 82.6612   1
   1   0 -16 1048.75 180.926   6
   1   0 -16 1174.94 194.680  10
  -1   0  16 1293.62 182.687   1
  -1   0  15 31.2228 61.7787   1
   1   0 -15 222.822 99.5692   6
   1   0 -15 241.644 108.881  10
   1   0 -14 3687.37 308.264  10
   1   0 -14 3512.51 306.360   6
  -1   0  14 3695.44 285.572   1
  -1   0  13 3333.75 263.024   1
   1   0 -13 3756.49 294.740   6
   1   0 -13 3731.55 296.363  10
   1   0 -12 9468.58 461.475  10
   1   0 -12 9266.68 461.238   6
   1   0 -12 10026.3 536.923   9
  -1   0  12 9363.22 431.439   1
  -1   0  12 8354.59 358.691   7
  -1   0  11 1075.04 115.895   7
   1   0 -11 1097.08 174.715   9
   1   0 -11 1249.14 162.576   6
  -1   0  11 1234.60 146.159   1
   1   0 -11 1201.77 156.027  10
   1   0 -10 4200.08 282.049   6
   1   0 -10 3592.69 289.347   9
  -1   0  10 4098.00 252.691   1
   1   0 -10 3968.12 264.354  10
  -1   0  10 3664.54 206.309   7
  -1   0   9 398.528 63.2042   7
   1   0  -9 365.432 118.009   9
  -1   0   9 396.064 88.7694   1
   1   0  -9 466.937 101.904   6
  -1   0   9 512.379 88.7529  10
   1   0  -9 392.421 91.3230  10
  -1   0   8 7078.77 313.163  10
  -1   0   8 7071.87 361.124   9
   1   0  -8 7749.04 384.131   9
   1   0  -8 7501.60 348.486   6
  -1   0   8 7612.35 322.497   1
   1   0  -8 6518.39 319.199  10
   1   0  -8 7392.50 314.832   1
  -1   0   8 7349.60 276.172   7
   1   0  -7 417.328 96.8425   9
  -1   0   7 538.466 83.0746   1
   1   0  -7 430.583 86.3900   6
   1   0  -7 490.577 88.5587  10
  -1   0   7 412.007 90.4026   9
  -1   0   7 494.371 63.4749   7
   1   0  -7 566.112 79.4678   1
  -1   0   7 538.357 85.0405  10
  -1   0   6 4436.35 211.055   1
   1   0  -6 4185.79 232.088   6
   1   0  -6 4360.86 245.900   9
   1   0  -6 4491.10 184.210   7
   1   0  -6 4730.77 217.175   1
  -1   0   6 4303.55 209.612  10
  -1   0   6 4334.35 184.073   7
   1   0  -6 4012.62 210.680  10
  -1   0   6 4395.01 244.655   9
  -1   0   5 701.982 66.0344   7
   1   0  -5 711.561 81.7315  10
  -1   0   5 553.344 83.5295   9
   1   0  -5 557.221 88.3374   9
   1   0  -5 507.505 84.2077   6
  -1   0   5 616.517 74.5877  10
   1   0  -5 683.205 64.7261   7
  -1   0   5 663.207 78.1354   1
   1   0  -5 853.750 84.9589   1
  -1   0   4 1420.82 94.5568  10
   1   0  -4 1247.08 111.700   6
  -1   0   4 1451.74 113.930   9
   1   0  -4 1407.92 114.540   9
  -1   0   4 1415.21 99.9502   1
   1   0  -4 1549.19 99.4057  10
   1   0  -4 1420.61 98.1835   1
   1   0  -4 1518.70 87.8766   7
  -1   0   4 1465.35 88.1841   7
   1   0  -3 4142.91 143.378   7
   1   0  -3 4284.57 148.522  10
  -1   0   3 4224.51 171.130   9
   1   0  -3 3890.84 168.772   9
  -1   0   3 4236.99 158.437   1
   1   0  -3 4433.84 159.439   1
  -1   0   3 4033.75 144.488  10
  -1   0   3 3936.78 144.792   7
   1   0  -3 3868.70 174.764   6
   1   0   3 494.054 52.2530   1
   1   0   3 455.164 60.9681  10
   1   0   3 429.054 39.6566   4
  -1   0  -3 350.131 37.7013   6
   1   0   3 359.538 59.4936   9
  -1   0  -3 445.160 58.9532  10
  -1   0  -3 448.733 45.6093   4
  -1   0  -3 461.620 50.3718   1
  -1   0  -4 58.6727 33.1481   6
  -1   0  -4 78.9545 37.8211   1
   1   0   4 51.9682 24.7738   4
   1   0   4 111.076 50.7239  10
   1   0   4 99.3018 39.0151   1
   1   0   4 39.8570 44.8750   9
  -1   0  -4 49.8514 45.8501  10
  -1   0  -4 85.0798 31.7060   4
  -1   0  -5 16251.0 428.449   6
  -1   0  -5 15215.1 384.735   4
   1   0   5 16232.8 475.943  10
  -1   0  -5 15241.2 504.395   9
  -1   0  -5 15407.9 475.001  10
   1   0   5 17360.6 523.717   9
  -1   0  -5 16946.6 447.751   1
   1   0   5 16160.8 372.643   4
   1   0   5 16750.4 445.571   1
  -1   0  -6 5086.20 216.467   6
  -1   0  -6 4416.90 261.056   9
  -1   0  -6 4818.62 218.050   1
  -1   0  -6 4572.42 247.649  10
   1   0   6 4926.80 249.009  10
  -1   0  -6 4701.11 171.929   4
   1   0   6 5017.04 223.779   1
   1   0   6 4862.82 158.661   4
   1   0   6 4980.94 271.877   9
  -1   0  -7 1500.61 126.350   6
  -1   0  -7 1224.78 135.387  10
  -1   0  -7 1529.68 95.0958   4
   1   0   7 1410.10 78.8248   4
  -1   0  -7 1515.31 126.464   1
   1   0   7 1248.25 151.935   9
   1   0   7 1509.10 141.432  10
   1   0   7 1362.90 122.373   1
  -1   0  -8 5134.36 253.050   6
  -1   0  -8 5201.25 255.316   1
  -1   0  -8 4832.90 284.435  10
  -1   0  -8 4990.65 186.577   4
   1   0   8 4958.23 165.129   4
   1   0   8 4855.97 250.628   1
   1   0   8 5587.60 292.295  10
   1   0   8 5673.73 332.249   9
   1   0   9 5206.28 168.099   4
  -1   0  -9 5164.73 194.808   4
   1   0   9 5041.47 267.849   1
   1   0   9 4890.08 205.437   7
  -1   0  -9 5145.39 308.624  10
  -1   0  -9 4973.83 263.980   6
  -1   0 -10 169.399 78.2145  10
   1   0  10 167.690 40.6143   7
  -1   0 -10 133.413 38.6563   4
   1   0  10 163.636 65.7501   1
  -1   0 -10 174.407 70.7285   6
  -1   0 -11 7579.36 366.727   6
   1   0  11 7180.02 283.813   7
   1   0  11 7277.62 357.052   1
  -1   0 -11 7489.40 406.356  10
   1   0  12 1527.82 126.603   7
  -1   0 -12 1534.06 167.426   6
  -1   0 -12 1479.42 181.681  10
   1   0  12 1578.73 169.768   1
  -1   0 -13 17.4450 62.4319  10
   1   0  13 64.9833 62.2475   1
   1   0  13 9.00239 37.1496   7
  -1   0 -13 26.4082 60.8097   6
   1   0  14 817.754 137.776   1
  -1   0 -14 860.681 144.302   6
   1   0  14 767.425 97.2702   7
  -1   0 -14 666.071 139.927  10
  -1   0 -15 631.603 127.466   6
  -1   0 -15 481.089 132.003  10
   1   0  15 505.941 116.127   1
   1   0  16 2198.41 236.218   1
  -1   0 -16 2204.23 236.601   6
  -1   0 -16 2332.17 279.164  10
  -1   0 -17 86.1990 96.6888  10
  -1   0 -17 45.8330 62.5639   6
   1   0  17 8.18795 64.5813   1
   1   0  18 210.620 99.9249   1
  -1   0 -18 39.3489 104.776  10
  -1   0 -18 116.922 73.7550   6
   1   0  19 468.404 126.226   1
  -1   0 -19 272.407 128.649  10
  -1   0 -19 276.410 97.4581   6
   1   0  20 2730.45 298.481   1
  -1   0 -20 2092.36 304.653  10
  -1   0 -20 2966.66 299.179   6
   1   0  21 403.575 137.948   1
  -1   0 -21 350.852 118.906   6
  -1   0 -21 219.281 123.284  10
   1   0  22 1376.69 235.229   1
  -1   0 -22 1059.38 241.398  10
  -1   0 -22 1175.85 198.488   6
  -1   0 -23-39.6278 78.9586   6
   1   0  23 35.8988 106.276   1
  -1   0 -23 26.9207 123.444  10
   1   0  24-25.7846 104.773   1
   1   0  24-35.7119 154.603   2
  -1   0 -24-192.397 120.382  10
  -1   0 -25-172.331 142.563  10
   1   1 -25 1689.78 271.691   6
   1   1 -25 1474.90 301.290  10
  -1  -1  24-198.032 136.692   2
  -1  -1  24-58.9432 100.756   1
   1   1 -24 52.7781 112.111  10
   1   1 -24 83.6528 77.1162   6
  -1  -1  23 428.638 133.732   1
   1   1 -23 249.235 131.640  10
  -1  -1  23 383.966 168.199   2
   1   1 -23 730.765 180.946   6
  -1  -1  22 74.7572 117.316   2
   1   1 -22 86.5751 73.3497   6
   1   1 -22-143.851 136.643  10
  -1  -1  22 262.830 139.648   1
  -1  -1  21 1152.25 203.372   1
   1   1 -21 1318.29 254.791  10
   1   1 -21 1318.11 228.194   6
   1   1 -20 229.967 117.484  10
  -1  -1  20 379.946 139.917   1
   1   1 -20 308.270 128.227   6
   1   1 -19 3526.01 369.734  10
   1   1 -19 3224.20 331.223   6
  -1  -1  19 3681.85 336.135   1
  -1  -1  18-10.6557 76.7957   1
   1   1 -18-1.00467 82.9455   6
   1   1 -18 39.1945 75.6656  10
   1   1 -17 1734.28 233.633   6
  -1  -1  17 1727.59 226.918   1
   1   1 -17 1785.19 245.589  10
  -1  -1  16 712.901 146.327   1
   1   1 -16 622.268 152.325  10
   1   1 -16 818.297 162.671   6
  -1  -1  15 538.289 125.506   1
   1   1 -15 473.161 132.012   6
   1   1 -15 580.067 142.780  10
   1   1 -14 1182.18 172.742  10
  -1  -1  14 1198.10 163.476   1
   1   1 -14 1615.35 207.030   6
  -1  -1  13 145.804 46.9344   7
   1   1 -13 225.336 85.5286  10
   1   1 -13 242.414 94.2397   6
  -1  -1  13 197.717 74.5186   1
   1   1 -12 8812.40 457.567  10
   1   1 -12 9868.80 474.826   6
  -1  -1  12 8544.63 420.179   1
  -1  -1  12 8741.95 349.712   7
  -1  -1  11 11931.8 411.662   7
   1   1 -11 12399.9 530.537  10
   1   1 -11 12977.7 538.574   6
  -1  -1  11 12330.0 497.551   1
   1   1 -10 265.252 85.4166   6
  -1  -1  10 256.632 77.6077   1
  -1  -1  10 370.821 65.7805   7
   1   1 -10 283.176 86.2805  10
   1   1  -9 8073.65 385.702   6
  -1  -1   9 9207.36 384.942  10
  -1  -1   9 8355.90 366.590   1
  -1  -1   9 8020.71 297.961   7
   1   1  -9 9008.44 400.659  10
  -1  -1   8 2757.41 190.916   1
  -1  -1   8 3272.62 243.370   9
   1   1  -8 2281.39 86.5585   4
  -1  -1   8 3399.81 208.563  10
   1   1  -8 3104.20 210.910  10
   1   1  -8 2982.26 192.997   1
  -1  -1   8 2657.79 147.024   7
   1   1  -7 7923.92 311.081   1
  -1  -1   7 7963.93 363.014   9
   1   1  -7 7708.45 325.580  10
   1   1  -7 6577.04 174.326   4
  -1  -1   7 8040.05 312.682   1
  -1  -1   7 7448.67 252.174   7
  -1  -1   7 8063.79 316.151  10
  -1  -1   6 11165.9 421.210   9
  -1  -1   6 10973.5 371.249   1
  -1  -1   6 11796.2 382.203  10
   1   1  -6 11335.4 370.677   1
   1   1  -6 11407.5 311.110   7
  -1  -1   6 10780.2 313.756   7
   1   1  -6 10638.0 374.957  10
  -1  -1   5 2985.03 131.823   7
  -1  -1   5 3305.22 168.751   1
   1   1  -5 2667.19 164.887  10
  -1  -1   5 3404.99 169.324  10
  -1  -1   5 3204.12 197.683   9
   1   1  -5 3198.63 130.885   7
   1   1  -5 3383.29 170.773   1
   1   1  -4 247.370 48.2543   1
   1   1  -4 224.470 53.3715  10
  -1  -1   4 177.700 46.3683   1
  -1  -1   4 244.529 37.4106   7
   1   1  -4 252.488 38.1160   7
  -1  -1   4 161.724 53.3717   9
   1   1  -3 9050.43 254.385   1
  -1  -1   3 8214.80 248.550   1
  -1  -1   3 8144.83 270.657   9
  -1  -1   3 7693.39 217.337   7
   1   1  -3 8573.79 250.921  10
   1   1  -3 8564.92 218.692   7
   1   1  -2-4.71282 17.5173   1
   1   1   3 5071.11 168.456   6
  -1  -1  -3 5046.86 168.462   6
   1   1   3 5310.19 167.386   1
   1   1   3 5698.03 204.630  10
  -1  -1  -3 5071.33 203.308  10
  -1  -1  -3 5144.80 204.974   9
  -1  -1  -3 5414.56 169.010   1
   1   1   3 4970.30 203.159   9
   1   1   4 9056.62 319.189   9
  -1  -1  -4 8878.27 317.671   9
   1   1   4 8902.54 263.035   1
  -1  -1  -4 8717.82 301.846  10
   1   1   4 9269.64 302.256  10
  -1  -1  -4 9212.75 264.453   1
   1   1   4 7924.84 228.560   4
  -1  -1  -4 9343.90 271.371   6
   1   1   4 8902.37 271.863   6
   1   1   5 120.954 30.3479   4
  -1  -1  -5 99.0297 64.2767   9
   1   1   5 160.839 48.0197   6
   1   1   5 88.6446 37.5745   1
  -1  -1  -5 85.0269 42.7502   1
  -1  -1  -5 96.9749 42.1243   6
   1   1   5 36.4164 44.5247   9
  -1  -1  -5 104.202 53.5273  10
   1   1   5 103.216 51.9072  10
   1   1   6 2347.19 186.078   9
  -1  -1  -6 2322.73 172.508  10
   1   1   6 2286.19 140.307   1
  -1  -1  -6 2712.22 148.417   1
   1   1   6 2136.22 99.1474   4
  -1  -1  -6 2469.62 191.073   9
   1   1   6 2249.96 159.456  10
  -1  -1  -6 1957.94 141.242   6
   1   1   6 2398.33 152.152   6
   1   1   7 882.032 60.8238   4
   1   1   7 821.583 132.483   9
  -1  -1  -7 1060.44 102.005   1
   1   1   7 1015.61 120.187  10
  -1  -1  -7 880.172 99.8834   6
  -1  -1  -7 987.916 137.279   9
  -1  -1  -7 957.434 123.305  10
   1   1   7 1094.13 103.910   1
  -1  -1  -8 956.916 112.537   6
  -1  -1  -8 1102.01 132.016  10
  -1  -1  -8 1161.47 114.214   1
   1   1   8 1236.99 136.062  10
   1   1   8 857.603 59.2468   4
   1   1   8 1100.28 144.944   9
  -1  -1  -8 914.220 137.608   9
   1   1   8 1216.05 117.871   1
  -1  -1  -9 282.357 68.6158   6
   1   1   9 339.640 36.7620   4
  -1  -1  -9 333.022 106.017   9
   1   1   9 349.630 90.0700  10
  -1  -1  -9 391.047 75.8626   1
   1   1   9 495.769 89.0662   1
  -1  -1  -9 328.017 91.6183  10
   1   1  10 1565.46 78.2077   4
   1   1  10 1857.98 133.702   7
  -1  -1 -10 1616.85 161.172   6
  -1  -1 -10 1830.48 192.943  10
   1   1  10 1750.00 161.067   1
  -1  -1 -10 1649.60 208.103   9
   1   1  11 3042.98 222.903   1
   1   1  11 2877.20 179.401   7
   1   1  11 2736.28 103.532   4
  -1  -1 -11 3172.36 261.879  10
  -1  -1 -11 2929.85 219.808   6
  -1  -1 -11 3006.00 287.273   9
  -1  -1 -12 4072.95 277.052   6
   1   1  12 4028.80 269.245   1
   1   1  12 4180.00 227.932   7
  -1  -1 -12 4073.25 348.531   9
  -1  -1 -12 4349.00 316.510  10
  -1  -1 -13 1106.80 154.775   6
  -1  -1 -13 1702.45 209.881  10
   1   1  13 1236.57 160.939   1
  -1  -1 -13 896.561 190.965   9
   1   1  14 106.999 75.9783   1
  -1  -1 -14 122.428 87.3673  10
  -1  -1 -14 107.204 56.5382   6
  -1  -1 -15 2526.10 248.166   6
  -1  -1 -15 2571.38 280.560  10
   1   1  15 2313.96 230.592   1
  -1  -1 -16 232.736 93.3399   6
   1   1  16 173.290 86.0774   1
  -1  -1 -16 102.430 78.5158  10
   1   1  17 2028.97 231.922   1
  -1  -1 -17 2529.65 253.098   6
  -1  -1 -17 1849.66 258.264  10
   1   1  18 467.773 119.602   1
  -1  -1 -18 245.865 116.090  10
  -1  -1 -18 459.779 120.487   6
  -1  -1 -19 88.0343 104.174  10
   1   1  19 46.9692 71.9073   1
  -1  -1 -19 229.128 89.4025   6
   1   1  20 1542.15 229.381   1
  -1  -1 -20 1425.67 252.976  10
  -1  -1 -20 1329.45 211.883   6
  -1  -1 -21 84.9953 104.152  10
  -1  -1 -21 10.1788 72.3167   6
   1   1  21-1.66690 83.4614   1
  -1  -1 -22 298.799 107.523   6
   1   1  22 291.150 156.717   2
   1   1  22 185.872 106.131   1
  -1  -1 -22 171.151 123.300  10
  -1  -1 -23 231.216 136.526  10
   1   1  23 336.254 141.003   1
   1   1  23-19.4676 120.020   2
  -1  -1 -23 464.691 160.096   6
   1   1  24-80.5111 129.297   1
  -1  -1 -24-84.8765 123.661  10
  -1  -1 -24-88.5653 79.7410   6
   1   1  24-102.990 124.529   2
  -1  -1 -25-14.2649 112.090  10
   1   2 -25 317.184 172.179  10
  -1  -2  24 621.847 221.351   2
   1   2 -24 522.836 184.092  10
   1   2 -24 704.696 185.026   6
   1   2 -23 296.973 138.577   6
  -1  -2  23 90.7658 81.8884   1
   1   2 -23 38.9969 103.445  10
  -1  -2  22-80.3963 110.628   1
   1   2 -22 123.140 134.277  10
   1   2 -22-49.2870 89.6970   6
   1   2 -21 764.802 204.872  10
   1   2 -21 800.365 178.247   6
  -1  -2  21 653.199 163.896   1
   1   2 -20 4626.15 440.834  10
  -1  -2  20 4370.60 388.041   1
   1   2 -20 4920.96 417.032   6
   1   2 -19 790.220 176.789   6
   1   2 -19 561.727 170.770  10
  -1  -2  19 593.898 151.348   1
   1   2 -18 5402.19 443.611  10
   1   2 -18 5292.87 418.758   6
  -1  -2  18 5399.92 405.094   1
   1   2 -17 1963.44 262.230  10
   1   2 -17 2324.20 268.567   6
  -1  -2  17 2207.28 253.735   1
  -1  -2  16 892.661 158.449   1
   1   2 -16 790.110 166.011  10
   1   2 -16 604.338 134.234   6
  -1  -2  15-85.3272 78.8471   1
  -1  -2  15-33.3964 45.2337   7
   1   2 -15-57.0127 84.5088  10
   1   2 -15 29.4224 71.4936   6
   1   2 -14 1929.47 234.768  10
  -1  -2  14 1716.11 147.468   7
   1   2 -14 1820.82 224.531   6
  -1  -2  14 1839.05 202.290   1
   1   2 -14 1410.83 83.2320   4
  -1  -2  13 329.018 87.3426   1
   1   2 -13 407.096 113.052  10
   1   2 -13 469.904 112.677   6
   1   2 -13 414.347 48.5865   4
  -1  -2  13 427.712 73.7795   7
  -1  -2  12 4086.74 283.933   1
  -1  -2  12 4358.29 221.855   7
   1   2 -12 3719.14 292.027   6
   1   2 -12 4014.31 157.589   4
   1   2 -12 4506.40 325.682  10
   1   2 -11 2367.90 226.190  10
  -1  -2  11 2382.44 206.348   1
  -1  -2  11 2276.39 148.703   7
   1   2 -11 2034.04 105.404   4
  -1  -2  10 97.2743 36.9717   7
   1   2 -10 63.5639 75.7592  10
   1   2 -10-0.93990 19.1195   4
  -1  -2  10-57.6307 51.8121   1
   1   2  -9 7450.91 364.140  10
   1   2  -9 6654.58 208.806   4
  -1  -2   9 7481.87 344.544   1
  -1  -2   9 7224.99 258.845   7
  -1  -2   8 938.185 81.5555   7
  -1  -2   8 1057.27 121.504   1
  -1  -2   8 1175.71 154.332   9
   1   2  -8 878.690 62.7965   4
   1   2  -8 842.948 116.343  10
  -1  -2   7 27886.9 802.039   9
  -1  -2   7 24594.5 583.299   7
   1   2  -7 24699.2 544.898   4
   1   2  -7 26055.6 690.620   1
   1   2  -7 25358.0 572.632   7
   1   2  -7 24180.4 705.019  10
  -1  -2   7 26495.5 696.158   1
  -1  -2   6 20490.3 518.714   7
   1   2  -6 24756.7 625.219   1
  -1  -2   6 23774.6 619.772   1
   1   2  -6 22639.5 641.896  10
   1   2  -6 23932.0 516.027   7
  -1  -2   6 23440.3 695.894   9
   1   2  -5 13109.1 389.447   1
   1   2  -5 12717.2 403.705  10
   1   2  -5 12402.8 304.308   7
  -1  -2   5 11932.7 318.410   7
  -1  -2   5 13148.4 404.437   3
  -1  -2   5 12782.2 386.204   1
  -1  -2   4 16940.9 432.693   1
  -1  -2   4 15289.9 438.412   3
   1   2  -4 16770.4 432.417   1
   1   2  -4 15517.2 356.663   7
  -1  -2   4 15460.6 372.146   7
  -1  -2   3 3166.61 114.208   7
   1   2  -3 3246.92 151.244   3
   1   2  -3 3192.40 139.483   1
  -1  -2   3 3500.19 145.365   1
  -1  -2   3 3140.69 113.159   5
   1   2  -3 3059.27 109.670   7
  -1  -2   3 2983.71 148.165   3
   1   2  -2 15.5672 18.1058   7
  -1  -2   2 25.5070 18.5845   5
   1   2  -2 16.4660 20.3442   1
  -1  -2   2 2.00754 17.2485   7
  -1  -2   2-12.2314 23.9078   3
  -1  -2   2 4.85967 20.6247   1
   1   2  -2-8.74740 17.5569   5
   1   2  -2 27.6967 27.5508   3
  -1  -2   1 2142.03 98.9694   3
   1   2  -1 2287.89 102.298   3
   1   2  -1 2216.18 85.2200   5
   1   2   2 3808.23 144.819   6
  -1  -2  -2 3590.90 144.525   2
  -1  -2  -2 3722.84 154.993   9
   1   2   2 4057.39 150.077   2
   1   2   2 3655.95 127.795   8
   1   2   2 3509.16 151.332   9
  -1  -2  -2 3804.95 125.530   8
  -1  -2  -2 4034.11 147.322   6
  -1  -2  -3 1426.76 90.7816   6
   1   2   3 1074.26 93.3708   2
   1   2   3 1389.45 101.474   9
   1   2   3 1225.57 94.6049  10
  -1  -2  -3 1387.15 104.065   9
   1   2   3 1217.76 66.9516   1
   1   2   3 1242.55 85.5318   6
  -1  -2  -3 1360.54 69.8777   1
   1   2   4 10766.3 322.584   6
  -1  -2  -4 10505.7 357.527   9
  -1  -2  -4 10836.9 286.321   1
   1   2   4 10343.9 339.862  10
   1   2   4 10458.8 286.699   1
  -1  -2  -4 10642.0 343.141  10
  -1  -2  -4 10558.1 319.909   6
   1   2   4 11243.7 359.132   9
   1   2   5 8820.62 346.358   9
   1   2   5 9549.60 333.614  10
   1   2   5 9258.62 284.788   1
  -1  -2  -5 9337.63 356.225   9
  -1  -2  -5 8728.09 328.828  10
  -1  -2  -5 9209.21 278.635   1
  -1  -2  -5 9351.87 312.402   6
   1   2   5 8955.69 311.352   6
  -1  -2  -6 1078.53 106.335   6
  -1  -2  -6 934.899 113.250  10
  -1  -2  -6 966.983 88.6121   1
   1   2   6 896.850 102.779   6
   1   2   6 1107.67 111.400  10
   1   2   6 932.362 117.609   9
   1   2   6 1049.52 96.5511   1
  -1  -2  -6 947.900 126.460   9
  -1  -2  -7 453.801 103.877   9
   1   2   7 517.071 102.131   9
  -1  -2  -7 636.977 105.789  10
   1   2   7 531.351 86.2668  10
  -1  -2  -7 554.972 71.8172   1
  -1  -2  -7 643.607 88.8820   6
   1   2   7 673.338 84.2558   1
   1   2   7 661.687 100.200   6
   1   2   8 322.222 71.0826   1
  -1  -2  -8 315.736 83.6083  10
  -1  -2  -8 390.953 68.9673   1
   1   2   8 307.512 70.9720   6
   1   2   8 438.879 87.6869  10
   1   2   8 269.703 78.4588   9
  -1  -2  -8 221.310 81.7494   9
   1   2   8 289.326 40.5999   4
  -1  -2  -8 269.560 67.4480   6
  -1  -2  -9 1595.64 193.213   9
   1   2   9 1837.91 154.656   1
   1   2   9 1959.98 175.335   6
  -1  -2  -9 1764.29 146.967   1
   1   2   9 1788.12 168.641  10
  -1  -2  -9 1833.15 161.914   6
   1   2   9 1431.91 85.5014   4
  -1  -2  -9 1773.31 186.265  10
   1   2  10 466.292 89.1208   1
  -1  -2 -10 297.284 87.6597  10
  -1  -2 -10 255.206 102.166   9
   1   2  10 347.691 38.6866   4
   1   2  10 301.499 74.4474   6
  -1  -2 -10 460.908 91.6221   6
   1   2  11 526.746 91.9442   1
   1   2  11 674.708 92.8060   7
  -1  -2 -11 539.433 110.553  10
  -1  -2 -11 477.615 128.880   9
   1   2  11 467.791 41.3693   4
  -1  -2 -11 678.179 113.753   6
  -1  -2 -12 1593.21 173.108   6
  -1  -2 -12 1232.47 177.548  10
  -1  -2 -12 1064.78 191.952   9
   1   2  12 1148.26 140.530   1
  -1  -2 -13 2248.21 212.065   6
   1   2  13 2206.16 206.306   1
  -1  -2 -13 2444.01 278.777   9
  -1  -2 -13 2167.79 234.581  10
   1   2  14 534.962 105.397   1
  -1  -2 -14 541.373 115.777   6
  -1  -2 -14 470.000 147.819   9
  -1  -2 -14 379.641 114.761  10
  -1  -2 -15 1974.86 284.773   9
  -1  -2 -15 1869.98 211.843   6
  -1  -2 -15 1879.28 241.203  10
   1   2  15 2335.02 233.100   1
   1   2  16 3007.06 270.972   1
  -1  -2 -16 3306.52 284.488   6
  -1  -2 -16 3345.24 325.947  10
  -1  -2 -16 3010.50 348.206   9
  -1  -2 -17 427.161 170.091   9
  -1  -2 -17 287.002 114.727  10
   1   2  17 416.574 125.414   1
  -1  -2 -17 429.475 115.313   6
  -1  -2 -18 139.494 95.5503   6
  -1  -2 -18 193.407 116.401  10
   1   2  18 59.5484 65.6321   1
   1   2  19 1693.47 277.908   2
   1   2  19 1701.31 229.638   1
  -1  -2 -19 1516.94 250.938  10
  -1  -2 -19 1696.37 226.741   6
   1   2  20 1116.54 247.822   2
  -1  -2 -20 1225.87 229.914  10
   1   2  20 1171.48 199.032   1
  -1  -2 -20 1124.72 186.384   6
  -1  -2 -21 98.8659 125.354  10
   1   2  21 97.1915 76.5475   1
  -1  -2 -21 46.4777 75.6311   6
   1   2  21-119.586 143.861   2
  -1  -2 -22-29.3854 93.4772  10
  -1  -2 -22 158.963 83.3025   6
   1   2  22-123.320 126.450   2
   1   2  22-2.74590 81.9131   1
  -1  -2 -23 127.152 85.1279   6
   1   2  23 30.9136 82.8323   1
   1   2  23 158.771 127.961   2
  -1  -2 -23-155.313 149.188  10
  -1  -2 -24 200.784 138.251  10
   1   2  24 37.2384 107.518   2
  -1  -2 -24 423.250 141.366   6
   1   2  24 378.656 143.172   1
  -1  -2 -25 25.5915 80.3652   6
  -1  -2 -25 228.708 154.224  10
  -1  -2 -26 426.010 203.897  10
   1   3 -24 875.208 242.897  10
  -1  -3  23-129.825 121.649   1
   1   3 -23 122.822 108.288  10
   1   3 -23 79.0664 90.6484   6
   1   3 -22 83.6392 103.134  10
   1   3 -22 42.1446 88.8748   6
  -1  -3  22-16.4593 76.3633   1
   1   3 -21 367.425 129.926   6
  -1  -3  21 273.813 124.870   1
   1   3 -21 390.928 173.203  10
   1   3 -20 1512.42 267.318  10
  -1  -3  20 1064.78 195.589   1
   1   3 -20 1159.80 203.165   6
   1   3 -19 2400.42 284.733   6
   1   3 -19 2779.65 342.870  10
  -1  -3  19 2307.78 274.426   1
   1   3 -18 4469.93 382.625   6
  -1  -3  18 4116.22 357.310   1
   1   3 -18 4153.83 396.224  10
   1   3 -17 278.946 140.302  10
   1   3 -17 373.644 130.507   6
  -1  -3  17 445.518 125.102   1
   1   3 -16 4899.81 203.779   4
   1   3 -16 5778.29 447.159  10
   1   3 -16 6576.87 440.907   6
  -1  -3  16 5954.65 404.183   1
   1   3 -15 16.1093 64.7760   6
  -1  -3  15 111.397 72.8269   1
   1   3 -15 19.6900 23.3033   4
  -1  -3  15-60.8813 49.3532   7
   1   3 -15-47.8406 74.7853  10
  -1  -3  14 73.9426 50.1710   7
   1   3 -14 41.9770 31.3424   4
   1   3 -14 6.89790 57.4591   6
   1   3 -14 7.41753 79.1367  10
  -1  -3  14 102.904 69.1813   1
   1   3 -13-4.70438 70.7872  10
  -1  -3  13 116.941 80.0804   1
   1   3 -13 23.9853 26.3339   4
  -1  -3  13 47.7352 35.8167   7
   1   3 -12 2390.70 133.575   4
  -1  -3  12 2682.41 234.726   1
  -1  -3  12 2506.48 160.728   7
   1   3 -12 2879.29 267.066  10
  -1  -3  11 14.6145 28.7962   7
  -1  -3  11 7.32298 49.9844   1
   1   3 -11 107.712 74.9165  10
   1   3 -11 51.8993 32.6154   4
   1   3 -10 3633.16 166.947   4
  -1  -3  10 3872.31 183.593   7
  -1  -3  10 3879.95 255.754   1
   1   3 -10 3740.72 275.976  10
   1   3  -9 5204.69 200.407   4
  -1  -3   9 5367.83 290.981   1
  -1  -3   9 5445.32 212.682   7
   1   3  -9 4810.79 301.814  10
  -1  -3   8 4970.03 263.737   1
   1   3  -8 4447.87 276.438  10
   1   3  -8 4699.62 183.828   4
  -1  -3   8 4633.18 185.871   7
   1   3  -7 11205.3 394.098   1
   1   3  -7 10905.7 279.296   7
  -1  -3   7 10899.7 393.236   1
  -1  -3   7 9651.50 294.150   7
  -1  -3   7 10528.3 405.356   3
   1   3  -7 10096.0 414.429  10
  -1  -3   6 615.579 58.4152   7
  -1  -3   6 556.647 55.4681   5
   1   3  -6 622.625 48.3623   7
  -1  -3   6 553.719 89.6718   3
  -1  -3   6 567.504 84.5071   1
   1   3  -6 522.177 90.9581  10
   1   3  -6 624.162 82.3062   1
   1   3  -5 2110.71 88.7388   7
  -1  -3   5 2254.67 142.774   1
  -1  -3   5 2040.73 145.778   3
  -1  -3   5 1878.15 93.3257   5
   1   3  -5 2227.15 141.114   1
  -1  -3   5 1996.41 96.1334   7
  -1  -3   4 1833.29 83.7265   5
   1   3  -4 1938.15 133.563   3
  -1  -3   4 1792.84 84.5032   7
   1   3  -4 1738.34 80.7217   7
  -1  -3   4 1957.41 122.931   1
  -1  -3   4 2056.31 140.733   3
   1   3  -4 2075.33 124.636   1
   1   3  -3 4398.93 144.005   7
   1   3  -3 4329.96 195.148   3
  -1  -3   3 4828.24 144.824   5
   1   3  -3 4332.72 141.806   5
  -1  -3   3 5304.47 189.727   1
  -1  -3   3 4923.27 206.993   3
   1   3  -3 5218.49 188.491   1
  -1  -3   2 3428.61 157.161   3
  -1  -3   2 3403.41 138.518   1
   1   3  -2 3667.00 124.156   5
  -1  -3   2 3638.08 123.352   5
   1   3  -2 3389.34 157.797   3
   1   3  -2 3752.75 141.772   1
   1   3  -1 1391.50 91.7947   3
  -1  -3   1 1269.61 89.0158   3
   1   3  -1 1471.67 72.6908   1
   1   3  -1 1394.56 97.1119   6
  -1  -3   1 1392.01 69.8945   1
   1   3  -1 1565.24 80.1315   5
   1   3   0 3567.72 139.296   2
  -1  -3   0 3685.63 152.079   3
   1   3   0 3659.75 160.076   6
  -1  -3   0 3534.55 128.830   8
  -1  -3   0 3243.22 154.259   6
   1   3   0 3717.76 154.731   3
  -1  -3   0 3551.81 139.407   2
   1   3   1 1115.75 67.9536   8
  -1  -3  -1 1096.82 86.7496   6
   1   3   1 1091.61 87.5108   6
  -1  -3  -1 1067.04 77.8451   2
  -1  -3  -1 1172.60 66.8803   8
   1   3   1 1295.09 83.2542   2
   1   3   2 1490.00 106.074   9
  -1  -3  -2 1504.56 103.190   6
  -1  -3  -2 1536.34 78.9008   8
  -1  -3  -2 1510.29 99.0418   2
  -1  -3  -2 1442.08 104.580   9
   1   3   2 1597.79 106.747   6
   1   3   2 1610.36 101.337   2
   1   3   2 1629.66 81.6551   8
  -1  -3  -3 3555.31 117.453   1
   1   3   3 3822.08 142.668   8
   1   3   3 3516.58 173.734   2
  -1  -3  -3 3898.14 179.935   2
   1   3   3 4153.98 179.841   6
   1   3   3 3515.64 115.722   1
   1   3   3 4056.03 190.717   9
  -1  -3  -3 3820.58 184.005   9
  -1  -3  -3 3679.48 177.811   6
   1   3   4 23389.9 536.282   1
  -1  -3  -4 26247.5 627.313   6
   1   3   4 26270.6 650.509   2
  -1  -3  -4 22409.8 621.291   2
   1   3   4 24773.4 617.471   6
   1   3   4 26108.3 653.017   9
  -1  -3  -4 26073.3 651.196   9
  -1  -3  -4 24311.4 536.638   1
   1   3   5 14954.3 443.159   6
   1   3   5 13320.4 451.694   9
  -1  -3  -5 13696.7 366.650   1
   1   3   5 14412.2 464.475   2
  -1  -3  -5 14958.8 438.981   6
  -1  -3  -5 13655.0 465.230   9
   1   3   5 14363.8 445.528  10
   1   3   5 13536.8 370.195   1
  -1  -3  -6 14249.9 456.898   6
   1   3   6 13659.6 459.677  10
   1   3   6 15630.1 476.292   6
   1   3   6 14108.9 405.857   1
   1   3   6 15324.5 504.524   9
   1   3   6 14792.1 499.551   2
  -1  -3  -6 14789.8 511.155   9
  -1  -3  -6 13885.0 398.669   1
   1   3   7 5071.98 289.057   2
  -1  -3  -7 5032.33 219.328   1
  -1  -3  -7 5307.60 297.507   9
   1   3   7 5527.46 297.014   9
   1   3   7 5213.35 266.802   6
   1   3   7 5491.12 275.343  10
   1   3   7 5236.13 229.800   1
  -1  -3  -7 4821.58 255.304   6
  -1  -3  -7 5156.93 272.397  10
   1   3   8 3091.72 238.403   9
  -1  -3  -8 2839.98 221.653  10
  -1  -3  -8 2912.46 173.299   1
   1   3   8 2719.79 201.717   6
   1   3   8 2481.69 222.227   2
   1   3   8 2713.33 179.189   1
  -1  -3  -8 2798.95 200.678   6
  -1  -3  -8 2857.74 235.462   9
   1   3   8 2979.73 207.478  10
   1   3   9 34.1481 72.8247   2
  -1  -3  -9 14.2156 33.4643   1
   1   3   9 111.586 57.9796   1
  -1  -3  -9 12.3680 52.6236   6
   1   3   9-13.9132 53.8664   6
  -1  -3  -9 101.639 70.9932  10
   1   3   9 4.18437 43.1898  10
  -1  -3  -9 54.6303 74.6943   9
  -1  -3 -10 607.732 104.659   6
  -1  -3 -10 663.644 131.736  10
   1   3  10 587.573 95.8999   1
   1   3  10 579.307 132.932   2
  -1  -3 -10 591.656 124.491   9
   1   3  10 482.053 55.6127   4
  -1  -3 -11 221.758 93.3563  10
  -1  -3 -11 131.217 83.5583   9
   1   3  11 278.510 78.4927   1
   1   3  11 206.537 36.6055   4
  -1  -3 -11 288.047 86.4664   6
   1   3  11 74.6689 67.4215   2
   1   3  12 495.687 120.268   2
   1   3  12 344.247 38.2686   4
  -1  -3 -12 239.453 93.7484   9
  -1  -3 -12 481.543 114.717   6
  -1  -3 -12 428.862 111.586  10
   1   3  12 438.546 93.2761   1
  -1  -3 -13 648.332 152.317   9
   1   3  13 937.195 135.581   1
  -1  -3 -13 740.869 122.271   6
  -1  -3 -13 697.841 137.053  10
   1   3  13 1024.37 188.010   2
  -1  -3 -14 248.857 88.6145   6
  -1  -3 -14 322.021 126.235   9
  -1  -3 -14 273.348 92.7999  10
   1   3  14 157.951 87.1414   2
   1   3  14 325.527 90.7788   1
  -1  -3 -15 331.155 141.356   9
  -1  -3 -15 359.041 108.208   6
   1   3  15 240.747 111.477   2
   1   3  15 480.876 108.658   1
  -1  -3 -15 374.639 119.548  10
  -1  -3 -16 2097.24 293.404   9
  -1  -3 -16 2199.88 238.692   6
  -1  -3 -16 2194.60 271.947  10
   1   3  16 2555.82 307.861   2
   1   3  16 2396.91 236.665   1
  -1  -3 -17 680.190 178.079   9
  -1  -3 -17 965.611 191.576  10
  -1  -3 -17 782.107 153.090   6
   1   3  17 936.869 210.324   2
   1   3  17 611.677 136.712   1
  -1  -3 -18 201.547 102.691  10
   1   3  18 352.611 102.381   1
  -1  -3 -18 296.657 112.774   6
   1   3  18 570.298 162.828   2
  -1  -3 -18 326.282 144.745   9
  -1  -3 -19 252.477 109.497   6
  -1  -3 -19 159.221 100.169  10
   1   3  19 66.5199 77.6275   1
   1   3  19 117.558 92.9417   2
  -1  -3 -19 241.128 151.631   9
  -1  -3 -20 2628.70 289.921   6
   1   3  20 3300.07 398.373   2
  -1  -3 -20 3016.18 356.473  10
   1   3  20 2960.10 307.382   1
   1   3  21 168.729 130.446   2
   1   3  21 213.433 94.5934   1
  -1  -3 -21 265.452 129.904  10
  -1  -3 -21 359.446 116.070   6
   1   3  22 957.459 229.836   2
  -1  -3 -22 1045.80 206.238   6
  -1  -3 -22 1093.80 227.421  10
   1   3  22 1139.05 213.902   1
  -1  -3 -23 325.965 133.455   6
   1   3  23 124.288 138.714   2
  -1  -3 -23 299.901 123.169  10
   1   3  23 304.264 137.644   1
   1   3  24-121.678 95.3119   1
   1   3  24-216.352 159.233   2
  -1  -3 -24 141.703 116.742   6
  -1  -3 -24-295.289 151.340  10
   1   3  25 437.753 144.970   1
  -1  -3 -25 442.966 172.922  10
  -1  -3 -25 308.962 120.902   6
   1   4 -24 687.726 219.271  10
   1   4 -23-187.115 96.4284   6
   1   4 -23 68.3064 152.162  10
  -1  -4  23 194.824 113.632   1
  -1  -4  22 646.807 172.966   1
   1   4 -22 567.588 166.556   6
   1   4 -22 896.691 238.871  10
  -1  -4  21 1182.69 216.558   1
   1   4 -21 1421.74 270.975  10
   1   4 -21 1300.77 229.900   6
   1   4 -20 1310.61 220.017   6
  -1  -4  20 1120.34 195.534   1
   1   4 -20 1177.06 234.988  10
  -1  -4  19 2684.17 299.600   1
   1   4 -19 3012.42 355.294  10
   1   4 -19 2780.21 308.896   6
   1   4 -18 140.756 108.061  10
  -1  -4  18 311.067 116.883   1
   1   4 -18 428.711 133.617   6
   1   4 -17 3515.83 329.488   6
   1   4 -17 3511.86 360.940  10
  -1  -4  17 3374.82 315.627   1
  -1  -4  16 96.6107 61.2359   1
   1   4 -16 251.073 55.6990   4
   1   4 -16 238.962 108.980  10
   1   4 -16 201.134 104.866   6
  -1  -4  15 344.562 107.648   1
   1   4 -15 146.907 90.1902  10
   1   4 -15 219.892 50.4198   4
  -1  -4  14 37.1221 34.5749   7
  -1  -4  14-13.8988 83.8192   1
   1   4 -14 76.2994 98.1305  10
   1   4 -14 56.5311 38.3656   4
   1   4 -13 1909.70 232.625  10
  -1  -4  13 1820.04 134.398   7
  -1  -4  13 2078.50 216.365   1
   1   4 -13 1997.40 137.587   4
   1   4 -12 134.023 42.1445   4
  -1  -4  12 72.8829 64.6399   1
   1   4 -12 143.414 79.7718  10
  -1  -4  12 68.7118 32.4260   7
   1   4 -11 1292.21 177.734  10
  -1  -4  11 1205.70 152.996   1
   1   4 -11 1260.42 109.711   4
  -1  -4  11 1262.99 100.141   7
  -1  -4  10 302.547 48.2429   5
   1   4 -10 239.144 50.1441   4
  -1  -4  10 290.951 83.5533   1
   1   4 -10 202.450 74.3372  10
  -1  -4  10 232.001 44.4491   7
  -1  -4   9 841.346 114.495   1
   1   4  -9 897.340 89.5748   4
  -1  -4   9 774.270 68.9973   5
   1   4  -9 820.482 132.034  10
  -1  -4   9 649.037 66.7757   7
  -1  -4   8 506.686 55.4403   5
   1   4  -8 546.164 110.223  10
   1   4  -8 521.225 47.6824   7
  -1  -4   8 696.373 105.206   1
   1   4  -8 661.999 77.7790   4
  -1  -4   8 487.341 54.5567   7
  -1  -4   7 1475.14 141.498   3
  -1  -4   7 1548.15 139.642   1
   1   4  -7 1232.91 144.652  10
   1   4  -7 1623.54 140.038   1
   1   4  -7 1252.41 67.4148   7
  -1  -4   7 1137.44 75.5229   7
  -1  -4   7 1288.64 78.6740   5
   1   4  -6 23407.0 596.138   1
  -1  -4   6 22540.7 613.381   3
  -1  -4   6 23478.7 598.821   1
   1   4  -5 1968.55 147.213   3
   1   4  -5 1789.94 133.472   1
  -1  -4   5 1673.06 137.083   3
  -1  -4   5 1516.78 74.7626   5
  -1  -4   5 1607.11 126.158   1
   1   4  -5 1403.08 73.3692   7
   1   4  -4 12184.4 312.437   5
  -1  -4   4 14363.2 405.857   1
   1   4  -4 15364.9 414.391   1
  -1  -4   4 13651.3 313.585   5
  -1  -4   4 14226.1 431.492   3
   1   4  -4 12065.0 314.387   7
   1   4  -4 14638.4 430.883   3
   1   4  -3-4.45846 39.1418   3
   1   4  -3 11.9345 25.9268   5
   1   4  -3 47.1496 31.3785   1
  -1  -4   3 2.06306 32.7459   1
  -1  -4   3-45.5456 46.0285   3
   1   4  -2 9442.16 276.135   1
  -1  -4   2 9471.09 308.003   3
   1   4  -2 9263.20 257.152   5
  -1  -4   2 9572.59 273.558   1
   1   4  -2 8924.45 299.735   3
   1   4  -1 183.395 48.8831   3
  -1  -4   1 275.440 57.4499   3
   1   4  -1 261.313 56.7305   6
   1   4  -1 368.981 52.2134   5
   1   4  -1 332.808 42.2929   1
  -1  -4   1 312.118 40.8977   1
  -1  -4   0 154.896 49.1492   3
   1   4   0 196.843 59.1878   6
   1   4   0 120.235 46.1050   2
   1   4   0 130.399 50.9725   3
  -1  -4   0 93.1189 34.5727   8
  -1  -4   0 77.7364 42.7573   6
  -1  -4   0 125.717 23.9434   1
  -1  -4   0 92.9692 38.9705   2
   1   4   1 1256.09 80.7324   8
   1   4   1 1009.47 92.9379   2
   1   4   1 1169.58 106.508   6
  -1  -4  -1 1177.98 73.6382   8
  -1  -4  -1 1158.31 95.8583   2
  -1  -4  -1 1257.44 106.249   6
   1   4   1 1280.27 104.306   3
  -1  -4  -2 16.9437 45.6791   6
  -1  -4  -2 4.11423 46.8942   9
  -1  -4  -2-14.7420 44.3977   2
   1   4   2-21.1214 27.6482   8
   1   4   2 64.2452 50.6124   6
  -1  -4  -2-2.52661 27.5178   8
   1   4   2 11.6345 38.1368   2
   1   4   3 16358.4 466.440   6
   1   4   3 15203.3 455.177   2
  -1  -4  -3 17545.2 481.439   6
  -1  -4  -3 16305.9 390.331   8
   1   4   3 16731.6 478.785   9
   1   4   3 16796.0 397.376   8
  -1  -4  -3 16685.1 469.270   2
  -1  -4  -3 16747.5 478.898   9
   1   4   3 14852.4 342.887   1
  -1  -4  -3 14990.9 339.889   1
   1   4   4 3539.09 149.580   8
  -1  -4  -4 3128.70 185.968   6
   1   4   4 3210.04 193.673   2
   1   4   4 3344.70 192.665   9
  -1  -4  -4 3300.19 125.442   1
   1   4   4 3393.01 187.921   6
  -1  -4  -4 3612.28 203.383   2
   1   4   4 3419.69 132.264   1
  -1  -4  -4 2912.52 192.736   9
   1   4   5 20607.6 609.764   2
   1   4   5 22371.9 624.186   9
  -1  -4  -5 20622.5 614.920   9
  -1  -4  -5 20614.7 603.617   2
  -1  -4  -5 20988.7 489.922   1
   1   4   5 21275.7 598.516   6
  -1  -4  -5 19927.9 590.680   6
   1   4   5 20550.2 494.041   1
  -1  -4  -6 177.180 40.2627   1
   1   4   6 227.241 67.1379   6
   1   4   6 134.433 60.4633   9
  -1  -4  -6 110.599 57.2138   9
   1   4   6 237.439 45.5637   1
   1   4   6 145.501 72.9343   2
  -1  -4  -6 166.477 71.6022   2
  -1  -4  -6 168.310 62.0289   6
   1   4   6 226.098 64.2595  10
   1   4   7 10865.9 422.001  10
   1   4   7 11753.7 462.994   9
   1   4   7 12469.2 448.918   6
  -1  -4  -7 11089.9 466.663   9
  -1  -4  -7 11137.8 426.697   6
  -1  -4  -7 11021.9 353.646   1
   1   4   7 11879.3 367.632   1
   1   4   7 11855.3 468.284   2
   1   4   8 2.37545 47.2779   6
  -1  -4  -8 4.60548 32.1182   1
   1   4   8-80.2121 60.4281  10
  -1  -4  -8-7.54769 61.2570   6
   1   4   8-20.3412 62.4421   2
   1   4   8 36.8857 40.3890   1
  -1  -4  -8-34.8580 75.5410   9
  -1  -4  -9 252.535 60.5981   1
   1   4   9 261.146 69.3556   1
  -1  -4  -9 491.101 131.462   9
   1   4   9 286.277 95.6082   2
  -1  -4  -9 235.507 81.2854   6
   1   4   9 401.032 92.5849  10
   1   4  10 1296.69 184.393   2
  -1  -4 -10 991.391 162.846   9
  -1  -4 -10 1036.93 139.326   6
   1   4  10 1133.14 125.282   1
  -1  -4 -10 1114.91 118.212   1
  -1  -4 -11 727.840 151.582   9
  -1  -4 -11 768.999 125.792   6
   1   4  11 950.260 167.271   2
   1   4  11 1033.61 126.373   1
   1   4  12 326.196 85.5885   1
  -1  -4 -12 402.428 114.761  10
  -1  -4 -12 182.253 72.8230   6
   1   4  12 169.171 34.8698   4
  -1  -4 -12 236.896 95.3055   9
   1   4  12 491.857 121.779   2
   1   4  13 404.225 90.4693   1
   1   4  13 363.834 46.6806   4
  -1  -4 -13 446.868 114.840  10
   1   4  13 359.127 108.249   2
  -1  -4 -13 272.604 116.813   9
  -1  -4 -13 353.811 105.286   6
   1   4  14 9.33115 54.2641   1
  -1  -4 -14-45.6930 85.7932  10
   1   4  14 14.1835 12.3482   4
   1   4  14-30.5040 81.5727   2
  -1  -4 -14 37.5811 77.0511   9
  -1  -4 -14-34.0364 59.8688   6
  -1  -4 -15 126.941 63.1622   6
   1   4  15-49.1445 99.1751   2
  -1  -4 -15-25.4980 85.1197   9
  -1  -4 -15 28.3833 69.3600  10
   1   4  15 112.166 73.0742   1
  -1  -4 -16 470.178 118.569   6
  -1  -4 -16 504.553 135.779  10
   1   4  16 544.194 156.740   2
   1   4  16 652.065 120.706   1
  -1  -4 -16 228.569 128.930   9
  -1  -4 -17 133.410 101.407  10
   1   4  17 116.233 89.4395   2
  -1  -4 -17 21.9233 103.360   9
   1   4  17 333.965 105.773   1
  -1  -4 -17 170.726 92.0390   6
  -1  -4 -18 1134.63 235.354   9
   1   4  18 1076.64 178.175   1
  -1  -4 -18 834.634 163.105   6
   1   4  18 1140.40 232.416   2
  -1  -4 -18 1034.25 206.563  10
  -1  -4 -19 551.395 156.713  10
   1   4  19 824.366 164.244   1
   1   4  19 786.619 193.009   2
  -1  -4 -19 641.984 199.288   9
  -1  -4 -19 649.562 150.198   6
   1   4  20 241.967 162.217   2
  -1  -4 -20 167.604 129.232  10
   1   4  20 75.5841 77.9172   1
  -1  -4 -20 173.767 130.587   9
  -1  -4 -20 130.502 70.8583   6
   1   4  21 1764.12 243.383   1
  -1  -4 -21 1618.86 227.898   6
   1   4  21 2301.04 337.106   2
  -1  -4 -21 1712.35 316.888   9
  -1  -4 -21 1677.81 270.162  10
  -1  -4 -22 259.786 105.506   6
   1   4  22 307.145 157.966   2
   1   4  22 383.929 126.048   1
   1   4  23 418.805 178.485   2
   1   4  23 347.658 122.212   1
  -1  -4 -23 307.028 128.656   6
   1   4  24 79.6143 143.825   2
   1   4  24 163.043 107.791   1
  -1  -4 -24-106.216 96.1144   6
  -1  -4 -25 60.7240 74.9610   6
   1   4  25 132.814 112.574   1
  -1  -4 -26-169.477 134.295   6
   1   5 -23 416.611 162.053  10
   1   5 -22 805.237 214.762  10
   1   5 -22 872.851 191.876   6
  -1  -5  22 704.250 181.717   1
   1   5 -21 189.753 98.2556   6
  -1  -5  21 194.755 115.135   1
   1   5 -21 129.679 123.628  10
   1   5 -20 3324.53 395.608  10
  -1  -5  20 3191.69 339.298   1
   1   5 -20 3851.77 374.371   6
  -1  -5  19-12.5923 86.1993   1
   1   5 -19 91.6825 121.197  10
   1   5 -19 105.271 87.5952   6
   1   5 -18 1955.92 258.527   6
  -1  -5  18 2496.01 283.926   1
   1   5 -18 2554.40 315.370  10
   1   5 -17 18.0988 82.2042  10
  -1  -5  17 17.2434 65.8361   1
  -1  -5  16 1861.53 230.972   1
   1   5 -16 1803.30 257.844  10
   1   5 -16 1870.34 150.535   4
   1   5 -15 179.688 53.3978   4
   1   5 -15 194.690 92.5327  10
  -1  -5  15 122.389 73.9683   1
  -1  -5  14 529.208 105.347   1
   1   5 -14 699.294 164.290  10
   1   5 -14 830.561 100.624   4
  -1  -5  14 665.191 73.1482   5
  -1  -5  13 2840.02 255.524   1
  -1  -5  13 2593.97 142.212   7
  -1  -5  13 2479.67 139.366   5
   1   5 -13 3142.33 296.890  10
   1   5 -13 2836.84 182.886   4
  -1  -5  12 9724.16 465.379   1
   1   5 -12 9524.04 353.603   4
  -1  -5  12 7810.98 270.395   7
   1   5 -12 9893.91 524.731  10
  -1  -5  12 8358.19 273.763   5
   1   5 -11 624.406 87.7597   4
  -1  -5  11 471.131 55.5012   7
  -1  -5  11 577.396 60.4806   5
  -1  -5  11 750.435 121.173   1
   1   5 -11 559.303 121.280  10
  -1  -5  10 665.262 59.7688   5
   1   5 -10 568.122 119.159  10
   1   5 -10 765.033 93.8993   4
  -1  -5  10 609.955 58.3337   7
  -1  -5  10 783.631 117.381   1
  -1  -5   9 87.1338 68.2332   1
   1   5  -9-29.8545 71.6955  10
  -1  -5   9 5.89403 16.2858   5
   1   5  -9-10.3767 34.1964   4
  -1  -5   9-9.45466 16.2231   7
  -1  -5   8 844.722 56.2678   5
   1   5  -8 947.092 143.245  10
  -1  -5   8 1032.09 128.912   1
   1   5  -8 705.383 46.8258   7
  -1  -5   7 3368.39 223.598   3
  -1  -5   7 3372.59 210.623   1
   1   5  -6 6525.65 289.354   1
  -1  -5   6 5764.54 168.259   5
  -1  -5   6 6615.58 291.845   1
  -1  -5   6 6931.58 313.283   3
   1   5  -5 1712.91 86.3528   5
   1   5  -5 2133.10 150.784   1
   1   5  -5 1939.44 156.925   3
  -1  -5   5 2203.35 166.703   3
   1   5  -5 1788.86 88.0471   7
  -1  -5   5 2122.07 149.041   1
   1   5  -4 22.2488 25.6285   7
  -1  -5   4 43.8965 36.7659   1
   1   5  -4 0.63911 30.6897   1
   1   5  -4 32.5517 40.7284   3
  -1  -5   4 43.3709 39.3272   3
   1   5  -4 50.2408 25.1727   5
   1   5  -3 1900.51 100.649   5
   1   5  -3 2119.69 146.308   3
   1   5  -3 2037.83 128.374   1
  -1  -5   3 1975.02 124.017   1
  -1  -5   3 2246.74 150.581   3
   1   5  -2 7167.78 270.595   3
   1   5  -2 6778.51 227.411   5
   1   5  -2 7266.98 240.744   1
  -1  -5   2 7255.80 237.038   1
   1   5  -2 6496.76 284.191   6
  -1  -5   2 6578.30 265.746   3
  -1  -5   1 26998.4 581.483   1
   1   5  -1 27041.0 689.163   6
  -1  -5   1 26094.3 654.592   2
   1   5  -1 25404.4 652.153   3
  -1  -5   1 25930.5 654.157   3
  -1  -5   1 25635.8 685.964   6
   1   5   0 2985.90 171.660   2
  -1  -5   0 2802.69 110.480   1
   1   5   0 3051.66 181.688   6
  -1  -5   0 2959.31 168.169   2
   1   5   0 2961.46 169.606   3
  -1  -5   0 2953.76 163.021   3
  -1  -5   0 2801.08 178.242   6
  -1  -5   0 2739.43 129.922   8
  -1  -5  -1 3366.43 140.720   8
   1   5   1 3515.55 192.990   2
   1   5   1 3719.03 154.004   8
   1   5   1 3767.92 192.309   3
  -1  -5  -1 3784.17 207.971   6
   1   5   1 3591.07 197.153   6
  -1  -5  -1 3593.76 188.716   2
   1   5   2 2257.45 152.977   2
   1   5   2 2330.41 162.991   6
  -1  -5  -2 2361.35 113.727   8
  -1  -5  -2 2110.43 156.731   6
  -1  -5  -2 2119.18 149.446   2
   1   5   2 2444.45 118.782   8
   1   5   3 16745.6 503.657   2
  -1  -5  -3 17638.9 522.758   6
   1   5   3 16591.6 509.102   6
  -1  -5  -3 17556.0 526.038   9
   1   5   3 18077.6 432.854   8
  -1  -5  -3 17502.6 418.462   8
  -1  -5  -3 15373.8 358.860   1
  -1  -5  -3 18436.7 518.676   2
  -1  -5  -4 9455.65 361.360   6
  -1  -5  -4 8981.58 351.858   2
   1   5   4 9272.66 353.939   2
   1   5   4 10158.1 369.194   6
  -1  -5  -4 9385.59 368.440   9
   1   5   4 8617.15 353.703   9
   1   5   4 7988.64 232.787   1
  -1  -5  -4 8330.93 231.559   1
   1   5   4 9218.24 279.827   8
   1   5   5 121.417 59.2849   2
   1   5   5 209.595 48.3979   8
   1   5   5 141.806 53.9847   6
  -1  -5  -5 111.413 54.9100   6
  -1  -5  -5 82.2632 27.3177   1
  -1  -5  -5 54.0924 55.6219   9
   1   5   5 103.009 55.0228   9
   1   5   5 146.649 37.6714   1
  -1  -5  -5 226.919 67.7592   2
   1   5   6 26463.3 647.837   8
  -1  -5  -6 25292.1 749.600   2
   1   5   6 24208.2 609.982   1
  -1  -5  -6 27107.8 613.456   1
   1   5   6 28889.0 782.942   9
  -1  -5  -6 25475.7 747.660   6
   1   5   6 25944.7 760.370   2
  -1  -5  -6 27032.6 779.165   9
   1   5   6 25342.6 735.544   6
  -1  -5  -7 2074.05 180.159   6
   1   5   7 1921.27 190.160   2
  -1  -5  -7 2162.65 130.882   1
  -1  -5  -7 2094.31 201.912   9
   1   5   7 1994.02 176.868   6
   1   5   7 2230.40 175.846  10
   1   5   7 2061.52 136.362   1
  -1  -5  -7 2240.66 201.941   2
   1   5   8 1967.86 143.444   1
   1   5   8 2162.55 182.025  10
  -1  -5  -8 1851.21 197.206   9
  -1  -5  -8 2002.26 181.614   6
   1   5   8 2152.02 207.474   2
  -1  -5  -8 1857.81 134.975   1
  -1  -5  -9 44.7905 70.0765   9
  -1  -5  -9 36.1259 40.5906   1
   1   5   9 114.952 76.9235   2
   1   5   9 136.036 50.9230   1
  -1  -5  -9 146.821 83.4945   6
   1   5   9 109.107 62.8166  10
   1   5  10 1452.90 142.270   1
  -1  -5 -10 1617.75 202.358   9
  -1  -5 -10 1813.94 181.955   6
  -1  -5 -10 1413.55 132.340   1
   1   5  10 1469.02 188.623   2
  -1  -5 -11 1290.05 192.190   9
   1   5  11 1699.24 216.381   2
  -1  -5 -11 1557.14 180.410   6
   1   5  11 1632.46 157.219   1
  -1  -5 -12 5761.04 363.634   6
  -1  -5 -12 6455.18 434.306   9
   1   5  12 6418.79 424.699   2
   1   5  12 5936.06 320.982   1
   1   5  13 2287.30 198.815   1
  -1  -5 -13 2464.62 282.405   9
  -1  -5 -13 1885.11 212.203   6
   1   5  13 2560.35 275.025   2
   1   5  14 878.570 81.2022   4
  -1  -5 -14 1090.98 169.704   6
  -1  -5 -14 993.436 202.187   9
   1   5  14 1263.23 210.155   2
   1   5  14 1264.71 157.774   1
   1   5  15 1020.28 62.1196   4
   1   5  15 1315.41 175.175   1
  -1  -5 -15 1109.35 210.798   9
  -1  -5 -15 1141.41 175.480   6
   1   5  15 1253.64 219.593   2
  -1  -5 -16 789.178 150.307   6
   1   5  16 755.392 135.551   1
   1   5  16 903.799 186.954   2
  -1  -5 -16 741.249 189.415   9
   1   5  17 662.087 133.326   1
  -1  -5 -17 350.421 156.870   9
  -1  -5 -17 460.661 118.566   6
   1   5  17 768.686 190.580   2
   1   5  18 974.260 205.856   2
   1   5  18 669.247 140.934   1
  -1  -5 -18 600.132 195.658   9
  -1  -5 -18 668.510 149.875   6
   1   5  19 183.197 81.4633   1
  -1  -5 -19 260.073 142.728   9
   1   5  19 292.045 152.541   2
  -1  -5 -19 15.9938 86.4996   6
   1   5  20 61.8796 110.740   2
   1   5  20 90.0281 86.6975   1
  -1  -5 -20 88.6604 102.170   9
  -1  -5 -20 46.5702 87.8427   6
  -1  -5 -21-96.6223 83.6177   6
  -1  -5 -21-71.1096 136.017   9
   1   5  21 9.90810 85.9306   1
   1   5  21-15.6593 94.2002   2
   1   5  22 26.3336 83.9555   1
  -1  -5 -22-24.9566 109.046   9
   1   5  22 302.113 168.623   2
  -1  -5 -22 295.846 132.118   6
   1   5  23 133.620 116.791   2
   1   5  23 14.1785 98.6000   1
  -1  -5 -23 140.634 110.524   6
  -1  -5 -23-8.67877 127.471   9
  -1  -5 -24 625.994 173.733   6
   1   5  24 405.447 142.336   1
  -1  -5 -25 75.7303 76.2286   6
   1   5  25 279.320 122.523   1
  -1  -5 -26-77.7284 109.105   6
   1   6 -23 2228.96 353.364  10
  -1  -6  22 101.787 108.896   1
   1   6 -22-201.995 147.661  10
   1   6 -21 293.519 140.202  10
  -1  -6  21 142.307 99.2651   1
   1   6 -21 332.669 126.815   6
   1   6 -20 814.658 191.097  10
  -1  -6  20 943.568 193.787   1
   1   6 -20 1289.06 237.188   6
   1   6 -19 111.177 105.989  10
   1   6 -19 28.9055 75.2595   6
  -1  -6  19 15.8332 97.6585   1
   1   6 -18 917.276 209.881  10
  -1  -6  18 648.733 147.206   1
   1   6 -17 124.834 107.031  10
  -1  -6  17 145.855 98.0134   1
   1   6 -16 436.616 149.142  10
   1   6 -16 415.787 81.5578   4
  -1  -6  16 382.320 110.387   1
   1   6 -15 56.1221 44.0382   4
  -1  -6  15-19.4520 89.1778   1
   1   6 -15-52.8128 91.1449  10
   1   6 -14 4384.73 254.147   4
   1   6 -14 4783.65 391.552  10
  -1  -6  14 4574.48 341.980   1
   1   6 -13 1839.64 245.054  10
  -1  -6  13 1266.88 68.3562   5
   1   6 -13 1933.01 162.776   4
  -1  -6  13 1750.69 201.664   1
   1   6 -12 15582.2 694.783  10
   1   6 -12 15219.1 518.982   4
  -1  -6  12 14923.3 618.624   1
   1   6 -11 3918.57 327.138  10
  -1  -6  11 4161.30 294.595   1
   1   6 -11 3839.56 232.488   4
   1   6 -10 4120.39 324.758  10
  -1  -6  10 4489.00 294.127   1
   1   6 -10 4447.72 244.104   4
   1   6  -9 118.307 53.5833   4
  -1  -6   9-0.17554 48.0618   1
  -1  -6   8 1375.94 148.022   1
   1   6  -8 987.208 153.804  10
   1   6  -7 2685.97 97.9498   7
  -1  -6   7 5238.07 266.350   1
   1   6  -6-21.4360 43.7240   1
  -1  -6   6 2.12669 44.6350   3
   1   6  -6 13.8879 50.0540   3
  -1  -6   6 22.7953 41.2440   1
   1   6  -6 38.5186 20.7381   7
   1   6  -6 61.3463 22.4581   5
   1   6  -5 6770.61 290.877   1
   1   6  -5 6096.73 200.463   7
   1   6  -5 6655.71 309.107   3
   1   6  -5 5724.32 195.485   5
  -1  -6   5 7271.30 319.802   3
  -1  -6   5 6682.17 286.225   1
   1   6  -4 3959.11 158.811   5
  -1  -6   4 4152.79 227.240   3
  -1  -6   4 3987.54 205.154   1
   1   6  -4 3963.21 205.135   1
   1   6  -4 4060.92 222.390   3
   1   6  -4 3947.79 234.085   6
  -1  -6   3 2741.81 153.171   1
   1   6  -3 2493.32 172.070   3
   1   6  -3 2625.69 131.932   5
  -1  -6   3 2440.44 167.523   3
   1   6  -3 2402.05 179.170   6
   1   6  -3 2605.47 153.653   1
   1   6  -2 2182.87 129.204   5
  -1  -6   2 2351.00 158.879   3
   1   6  -2 2091.37 166.434   6
  -1  -6   2 2381.01 131.447   1
   1   6  -2 2415.88 158.136   3
  -1  -6   1 32017.2 797.003   3
   1   6  -1 30768.1 790.462   3
  -1  -6   1 30646.7 827.718   6
   1   6  -1 35234.4 851.142   6
  -1  -6   1 32362.7 806.002   2
  -1  -6   1 32451.5 709.290   1
  -1  -6   0 4673.47 233.716   2
  -1  -6   0 4437.79 178.670   8
  -1  -6   0 4406.25 157.981   1
   1   6   0 4176.89 225.971   2
   1   6   0 4375.61 244.703   6
  -1  -6   0 4591.51 250.181   6
   1   6   0 4799.73 234.214   3
  -1  -6   0 4832.02 228.230   3
   1   6   1 4666.21 232.573   3
   1   6   1 4729.45 247.355   6
  -1  -6  -1 4733.06 179.684   8
   1   6   1 4841.63 244.970   2
  -1  -6  -1 4239.45 227.630   2
  -1  -6  -1 4405.40 244.004   6
   1   6   2 5169.37 265.399   6
  -1  -6  -2 5093.17 188.961   8
  -1  -6  -2 5050.61 255.702   2
   1   6   2 5237.87 195.530   8
   1   6   2 4552.25 235.518   3
   1   6   2 4723.08 250.603   2
  -1  -6  -2 4538.74 259.227   6
   1   6   3 1384.40 135.607   2
  -1  -6  -3 1241.78 64.3578   1
  -1  -6  -3 1403.08 93.5349   8
   1   6   3 1230.40 129.560   6
   1   6   3 1472.04 98.0746   8
  -1  -6  -3 1430.01 135.732   2
  -1  -6  -3 1538.53 148.100   6
  -1  -6  -3 1344.67 143.604   9
  -1  -6  -4 710.346 53.4921   1
  -1  -6  -4 746.861 116.070   6
   1   6   4 507.644 88.6233   6
  -1  -6  -4 724.112 116.988   9
   1   6   4 746.411 106.232   2
  -1  -6  -4 665.507 98.7700   2
   1   6   4 837.802 77.3805   8
   1   6   5 5377.80 215.554   8
  -1  -6  -5 5458.81 297.269   6
   1   6   5 5150.91 183.064   1
   1   6   5 5013.93 282.538   9
   1   6   5 5371.63 282.969   6
  -1  -6  -5 4790.60 174.142   1
   1   6   5 4557.83 272.780   2
  -1  -6  -5 5389.96 296.929   2
  -1  -6  -5 4721.75 285.419   9
   1   6   6 5187.23 205.297   1
  -1  -6  -6 4985.68 315.989   9
  -1  -6  -6 5588.55 203.502   1
  -1  -6  -6 5556.31 308.074   2
   1   6   6 5661.53 232.834   8
  -1  -6  -6 5070.00 298.446   6
   1   6   6 5792.24 315.018   2
  -1  -6  -7 108.384 69.3848   6
   1   6   7 120.601 41.1223   1
   1   6   7 144.541 45.8661   8
  -1  -6  -7 148.222 69.0292   9
   1   6   7 16.0897 55.1333   2
  -1  -6  -7 118.232 39.4116   1
   1   6   8 26.6545 66.7408   2
  -1  -6  -8 16.7472 73.3689   6
  -1  -6  -8-66.5932 80.9125   9
  -1  -6  -8-33.1769 32.0387   1
   1   6   8 43.9155 43.5687   1
   1   6   8-9.79805 45.3914  10
   1   6   9 33.9697 69.0006   2
   1   6   9 32.4826 37.1256   1
  -1  -6  -9 49.8118 33.1842   1
  -1  -6  -9-10.3656 70.3445   9
  -1  -6  -9 4.51761 54.7274   6
   1   6  10 14.6358 62.3843   2
   1   6  10-9.54587 37.8859   1
  -1  -6 -10-14.8287 55.3142   6
  -1  -6 -10 19.3496 39.2616   1
  -1  -6 -10-10.2612 73.6435   9
   1   6  11-53.7387 44.2714   1
   1   6  11 83.9039 80.8176   2
  -1  -6 -11 53.1065 70.1088   6
  -1  -6 -12 4700.40 374.900   9
   1   6  12 4533.88 282.596   1
   1   6  12 5020.07 377.815   2
  -1  -6 -12 5019.65 343.317   6
  -1  -6 -13 1626.54 237.838   9
   1   6  13 1469.73 168.615   1
   1   6  13 1958.87 249.642   2
  -1  -6 -13 2027.80 222.729   6
   1   6  14 3079.45 260.505   1
  -1  -6 -14 3147.26 340.983   9
  -1  -6 -14 3305.27 295.273   6
   1   6  14 3680.43 347.263   2
  -1  -6 -15 397.315 137.407   9
  -1  -6 -15 700.376 155.385   6
   1   6  15 568.751 144.488   2
   1   6  15 277.005 87.8009   1
   1   6  16 429.911 110.056   1
  -1  -6 -16 426.555 123.710   6
   1   6  16 347.089 117.498   2
  -1  -6 -16 230.984 114.841   9
  -1  -6 -17 362.666 118.340   6
   1   6  17 539.800 130.384   1
   1   6  17 415.317 155.887   2
  -1  -6 -17 169.284 112.452   9
   1   6  18 232.100 131.677   2
  -1  -6 -18 23.3603 78.5195   6
  -1  -6 -18 26.0920 105.449   9
   1   6  18 59.1789 74.5961   1
   1   6  19 402.081 130.697   2
  -1  -6 -19 412.097 140.191   6
  -1  -6 -19 645.455 193.377   9
   1   6  19 282.682 90.9343   1
  -1  -6 -20 66.6768 107.781   9
  -1  -6 -20-1.10136 78.4052   6
   1   6  20 63.9335 72.6448   1
   1   6  20 10.6725 106.717   2
   1   6  21 437.790 167.431   2
   1   6  21 370.866 121.328   1
  -1  -6 -21 244.661 100.441   6
  -1  -6 -21 307.829 135.691   9
  -1  -6 -22 122.559 93.8339   6
  -1  -6 -22 11.6120 144.916   9
   1   6  22 82.0142 72.3315   1
   1   6  22-250.447 129.957   2
  -1  -6 -23 1085.61 262.321   9
  -1  -6 -23 1094.86 213.605   6
   1   6  23 1487.06 312.418   2
   1   6  23 1516.19 243.351   1
  -1  -6 -24-20.2711 109.902   6
  -1  -6 -24-75.3310 138.982   9
   1   6  24 150.016 120.026   1
   1   6  25 1166.91 239.302   1
  -1  -6 -25 1160.51 234.919   6
  -1  -6 -26 106.747 103.824   6
   1   7 -22 1001.50 244.251  10
   1   7 -21-39.4139 117.988  10
  -1  -7  21 123.192 127.443   1
   1   7 -20 205.542 112.548   6
   1   7 -20-55.8172 109.629  10
  -1  -7  20 152.136 84.9160   1
   1   7 -19-159.136 129.375  10
  -1  -7  19 28.2590 73.7123   1
   1   7 -18 1405.70 247.474  10
  -1  -7  18 1024.36 193.413   1
   1   7 -17-22.0512 85.8655  10
  -1  -7  17-79.3694 111.529   1
   1   7 -16 59.0840 94.2191  10
   1   7 -16 314.384 86.3430   4
  -1  -7  16 127.574 88.0120   1
   1   7 -15 1293.02 217.412  10
  -1  -7  15 1504.00 212.118   1
   1   7 -15 1328.88 150.698   4
   1   7 -14 45.7808 54.5709   4
  -1  -7  14 111.447 94.9833   1
   1   7 -14 8.73255 77.6319  10
  -1  -7  13 11725.1 565.173   1
   1   7 -13 12381.8 655.298  10
   1   7 -13 11321.1 466.211   4
   1   7 -12 164.513 64.8554   4
   1   7 -12 136.638 79.3885  10
  -1  -7  12 158.667 88.8040   1
  -1  -7  11 12470.4 544.912   1
   1   7 -11 12212.5 474.765   4
   1   7 -11 12193.8 608.990  10
  -1  -7  10 139.041 71.4347   1
   1   7 -10 110.844 80.6094  10
   1   7 -10 144.048 56.0714   4
   1   7  -9 491.099 91.5714   4
   1   7  -9 631.522 140.663  10
  -1  -7   9 509.776 93.9359   1
  -1  -7   8 393.272 80.3169   1
  -1  -7   7 1105.31 132.501   1
   1   7  -7 1051.55 135.369   3
   1   7  -6 538.552 52.5634   5
   1   7  -6 515.524 91.6225   3
   1   7  -6 458.955 47.9076   7
  -1  -7   6 681.514 100.372   1
  -1  -7   5 14633.5 494.977   3
   1   7  -5 13592.7 477.179   3
   1   7  -5 12979.7 453.018   1
  -1  -7   5 13136.8 446.048   1
   1   7  -5 13726.0 506.692   6
   1   7  -5 11853.8 344.289   5
   1   7  -4 463.485 72.3932   1
  -1  -7   4 539.574 83.1663   1
  -1  -7   4 404.472 76.9368   3
   1   7  -4 436.871 85.9911   3
   1   7  -4 438.491 56.1496   5
   1   7  -4 409.740 88.1446   6
  -1  -7   3 1145.60 124.192   3
   1   7  -3 1185.59 122.192   3
   1   7  -3 1246.28 139.789   6
  -1  -7   3 1150.70 105.246   1
   1   7  -3 1242.29 99.2657   5
  -1  -7   2 9373.11 311.439   1
  -1  -7   2 9611.60 374.299   3
   1   7  -2 10239.6 406.563   6
   1   7  -2 9519.97 366.208   3
  -1  -7   2 9891.96 388.691   2
  -1  -7   1 163.525 65.3738   6
  -1  -7   1 175.393 41.2965   1
  -1  -7   1 41.7290 46.0346   2
   1   7  -1 121.183 48.2942   3
   1   7  -1 146.724 55.7093   6
  -1  -7   1 217.329 54.5340   3
   1   7   0 23975.2 720.782   6
  -1  -7   0 25271.5 594.936   8
  -1  -7   0 22893.7 554.555   1
  -1  -7   0 25734.8 685.587   3
  -1  -7   0 22732.1 708.669   6
  -1  -7   0 25676.0 705.448   2
   1   7   0 26675.8 694.834   3
   1   7   1 28.4266 52.0401   2
  -1  -7  -1 58.9876 30.3423   8
  -1  -7  -1 43.7942 23.6373   1
  -1  -7  -1 104.117 53.2568   2
   1   7   1 7.14156 51.8987   3
   1   7   1-24.9526 46.1257   6
  -1  -7  -1 38.5443 55.0075   6
   1   7   2 17292.0 453.699   8
  -1  -7  -2 16578.4 552.051   2
   1   7   2 17388.0 566.094   2
  -1  -7  -2 15964.5 561.749   6
   1   7   2 18424.1 583.276   6
   1   7   2 16749.3 537.939   3
  -1  -7  -2 17736.7 450.383   8
  -1  -7  -3 1004.17 81.8249   8
  -1  -7  -3 1038.66 125.018   2
  -1  -7  -3 1107.57 142.101   6
  -1  -7  -3 679.923 52.3792   1
   1   7   3 1133.49 91.0780   8
   1   7   3 963.679 126.358   6
   1   7   3 901.524 120.818   2
   1   7   4 3935.02 178.330   8
  -1  -7  -4 4204.15 261.137   2
  -1  -7  -4 3743.09 252.307   6
  -1  -7  -4 3940.96 258.956   9
  -1  -7  -4 3670.45 168.893   8
   1   7   4 4185.05 259.362   2
  -1  -7  -4 3318.13 130.707   1
  -1  -7  -5 970.136 129.785   6
   1   7   5 1072.73 97.1630   8
  -1  -7  -5 977.958 70.3035   1
  -1  -7  -5 1052.99 144.396   9
   1   7   5 686.161 113.693   2
   1   7   6 3673.24 257.119   2
   1   7   6 3929.33 194.244   8
   1   7   6 3688.71 163.313   1
  -1  -7  -6 3381.26 264.301   9
  -1  -7  -6 3780.37 161.065   1
  -1  -7  -6 4075.37 273.251   6
   1   7   7 1060.07 94.3428   1
  -1  -7  -7 1138.76 91.7923   1
  -1  -7  -7 842.193 154.550   9
   1   7   7 854.601 139.039   2
   1   7   7 1234.04 109.459   8
  -1  -7  -7 946.697 139.020   6
   1   7   8 1213.87 164.711   2
   1   7   8 997.482 107.336   8
  -1  -7  -8 899.474 154.298   9
   1   7   8 1045.42 101.470   1
  -1  -7  -8 879.851 140.641   6
  -1  -7  -8 1144.13 100.709   1
   1   7   9 901.189 146.106   2
  -1  -7  -9 877.707 159.579   9
   1   7   9 865.760 97.2156   1
  -1  -7  -9 881.223 141.698   6
  -1  -7  -9 642.764 84.4515   1
   1   7  10 77.5658 44.5128   1
  -1  -7 -10 16.9415 68.6717   9
  -1  -7 -10 62.5648 37.9676   1
   1   7  10 26.8007 63.4475   2
  -1  -7 -10 40.7615 60.1198   6
  -1  -7 -11 556.721 90.5396   1
   1   7  11 599.534 146.456   2
  -1  -7 -11 517.929 119.621   6
   1   7  11 732.086 103.911   1
  -1  -7 -11 424.948 131.647   9
   1   7  12 82.0691 83.5503   2
  -1  -7 -12 211.528 84.5351   6
  -1  -7 -12 11.4925 75.4444   9
   1   7  12 34.1097 56.9993   1
   1   7  13 6631.66 463.835   2
  -1  -7 -13 6102.07 405.456   6
   1   7  13 6921.58 365.451   1
  -1  -7 -13 7420.20 491.354   9
  -1  -7 -14 225.394 87.9107   6
   1   7  14 166.036 94.2621   2
   1   7  14 122.687 63.7980   1
  -1  -7 -14 159.682 95.5154   9
   1   7  15 1145.08 162.483   1
   1   7  15 1041.62 202.358   2
  -1  -7 -15 914.519 203.082   9
  -1  -7 -15 1152.45 188.368   6
   1   7  16 707.105 184.375   2
  -1  -7 -16 587.601 174.839   9
  -1  -7 -16 836.681 175.482   6
   1   7  16 659.775 125.656   1
  -1  -7 -17 1106.08 184.828   6
   1   7  17 1128.27 231.549   2
   1   7  17 1068.77 166.656   1
  -1  -7 -17 1076.46 228.530   9
  -1  -7 -18-142.623 135.773   9
   1   7  18-228.554 137.086   2
   1   7  18 62.8489 69.1812   1
  -1  -7 -18-19.8672 80.1334   6
  -1  -7 -19 248.732 113.386   6
  -1  -7 -19 178.936 105.023   9
   1   7  19-173.792 148.938   2
   1   7  19 173.551 105.163   1
  -1  -7 -20-26.6559 79.4375   6
   1   7  20-25.2415 94.3205   2
  -1  -7 -20-142.132 154.107   9
   1   7  20 58.2673 71.8834   1
   1   7  21-6.63868 105.982   2
   1   7  21-75.2971 102.100   1
  -1  -7 -21 91.4667 126.228   9
  -1  -7 -21 112.125 123.075   6
  -1  -7 -22 124.891 119.618   6
  -1  -7 -22 186.772 169.109   9
   1   7  22 18.4010 72.7572   1
   1   7  22 17.7630 94.6575   2
   1   7  23 124.417 114.738   1
  -1  -7 -23-73.1488 132.689   9
  -1  -7 -23 239.720 138.787   6
   1   7  23 292.672 189.387   2
  -1  -7 -24 1381.13 249.589   6
   1   7  24 1514.90 257.926   1
  -1  -7 -25 166.575 133.028   6
   1   7  25 186.396 134.160   1
  -1  -8  21-5.06616 95.5620   1
   1   8 -21-230.921 156.715  10
   1   8 -20 398.365 146.993  10
  -1  -8  20 138.773 100.777   1
   1   8 -19 199.271 142.496  10
  -1  -8  19 198.023 119.958   1
   1   8 -18 2732.70 360.168  10
  -1  -8  18 2575.50 311.551   1
   1   8 -17 769.131 211.607  10
  -1  -8  17 789.410 170.506   1
   1   8 -16 1076.13 208.755  10
   1   8 -16 1102.30 146.811   4
  -1  -8  16 1208.22 196.230   1
   1   8 -15 165.618 104.734  10
   1   8 -15 17.0108 62.6770   4
  -1  -8  15 120.060 81.7014   1
  -1  -8  14 1524.25 206.288   1
   1   8 -14 1479.99 236.611  10
   1   8 -14 1697.71 183.268   4
   1   8 -13 1562.75 174.976   4
   1   8 -13 1578.08 236.172  10
  -1  -8  13 1775.83 215.655   1
   1   8 -12 4247.96 377.452  10
   1   8 -12 4242.72 285.432   4
  -1  -8  12 4506.08 332.165   1
   1   8 -11 1791.52 187.158   4
  -1  -8  11 1847.76 203.138   1
   1   8 -11 1809.88 233.842  10
  -1  -8  10 1264.05 160.931   1
   1   8 -10 1268.08 150.707   4
   1   8 -10 1133.70 190.756  10
   1   8  -9 1009.05 132.719   4
   1   8  -9 1241.82 185.154  10
  -1  -8   9 1146.63 149.497   1
   1   8  -8-40.4970 55.1667   4
  -1  -8   8-29.6676 56.2144   1
   1   8  -7 289.867 38.7065   5
   1   8  -7 430.973 49.2029   7
   1   8  -7 561.869 105.594   3
  -1  -8   7 635.680 102.424   1
   1   8  -6 5511.16 310.660   3
  -1  -8   6 5273.09 282.749   1
   1   8  -6 4247.82 176.535   5
   1   8  -6 4501.08 183.059   7
   1   8  -5 9385.66 303.201   5
   1   8  -5 10452.2 419.185   3
  -1  -8   5 9608.82 384.111   1
   1   8  -4 7461.67 274.424   5
  -1  -8   4 8187.27 362.344   3
   1   8  -4 7843.32 350.757   3
  -1  -8   4 7637.32 314.405   1
  -1  -8   3 5848.64 292.518   3
   1   8  -3 4973.56 230.811   5
  -1  -8   3 5261.16 242.144   1
   1   8  -3 5184.40 280.894   3
  -1  -8   2 1352.12 143.147   2
  -1  -8   2 1021.51 122.237   3
   1   8  -2 1345.14 134.598   3
  -1  -8   2 1319.84 110.909   1
   1   8  -1 18118.1 580.355   3
  -1  -8   1 19184.1 585.538   3
  -1  -8   1 19520.7 609.012   2
  -1  -8   1 17640.5 621.067   6
  -1  -8   1 17403.3 477.113   1
  -1  -8   1 18658.5 502.105   8
  -1  -8   0 5140.85 200.772   1
  -1  -8   0 5756.15 226.030   8
  -1  -8   0 5401.39 313.950   6
  -1  -8   0 5643.80 297.548   2
   1   8   0 6245.33 300.726   3
  -1  -8  -1 7992.93 380.285   6
   1   8   1 8179.80 359.447   3
  -1  -8  -1 8741.50 283.656   8
   1   8   1 8053.74 377.162   2
  -1  -8  -1 7789.59 242.858   1
  -1  -8  -1 8884.91 384.508   2
  -1  -8  -2 7230.01 253.175   8
  -1  -8  -2 6534.87 333.085   2
   1   8   2 6539.14 327.935   3
   1   8   2 6596.04 342.040   2
  -1  -8  -2 7244.61 360.630   6
  -1  -8  -3 932.363 78.8148   8
   1   8   3 911.404 84.3657   8
   1   8   3 839.819 115.335   3
  -1  -8  -3 705.834 116.751   6
   1   8   3 670.903 118.521   2
  -1  -8  -3 793.115 59.8173   1
  -1  -8  -4 949.515 140.271   6
   1   8   4 1081.99 93.7821   8
  -1  -8  -4 902.124 65.0918   1
   1   8   4 963.935 131.558   2
  -1  -8  -4 961.387 85.7598   8
  -1  -8  -4 918.173 143.101   9
   1   8   5 4833.14 296.368   2
  -1  -8  -5 4428.69 302.672   9
  -1  -8  -5 4236.37 290.676   6
  -1  -8  -5 4195.60 160.996   1
   1   8   5 4533.06 207.982   8
   1   8   6 8414.44 430.616   2
   1   8   6 9696.40 337.220   8
  -1  -8  -6 8872.12 440.068   6
  -1  -8  -6 8688.96 271.999   1
  -1  -8  -6 9353.41 460.459   9
   1   8   7 6300.90 371.318   2
  -1  -8  -7 6473.08 374.133   6
   1   8   7 6551.27 278.445   8
  -1  -8  -7 6667.63 240.089   1
  -1  -8  -7 6178.50 377.140   9
  -1  -8  -8 3948.32 313.736   9
   1   8   8 4098.04 219.511   8
  -1  -8  -8 4025.05 190.988   1
   1   8   8 3710.41 292.386   2
   1   8   8 4206.00 205.031   1
  -1  -8  -8 3764.49 289.452   6
  -1  -8  -9 22.3897 28.9565   1
  -1  -8  -9-3.40501 72.2612   6
  -1  -8  -9 74.1949 80.2401   9
   1   8   9-35.7843 69.8438   2
   1   8   9-25.4696 44.9112   1
   1   8  10 89.6266 42.7175   1
  -1  -8 -10 50.9449 62.4751   6
   1   8  10 6.65494 85.5553   2
  -1  -8 -10 145.789 94.0556   9
  -1  -8 -10 82.5875 35.3111   1
  -1  -8 -11 539.940 125.989   6
  -1  -8 -11 440.398 78.5916   1
  -1  -8 -11 374.135 117.897   9
   1   8  11 604.375 94.2038   1
   1   8  11 479.199 120.371   2
   1   8  12 914.105 176.804   2
  -1  -8 -12 911.960 153.280   6
   1   8  12 1165.37 136.797   1
  -1  -8 -12 601.745 146.793   9
  -1  -8 -13 1093.53 180.234   6
  -1  -8 -13 872.416 185.376   9
   1   8  13 1394.34 159.794   1
   1   8  13 1192.07 203.498   2
   1   8  14 6821.08 493.244   2
   1   8  14 7135.85 380.105   1
  -1  -8 -14 6653.08 444.153   6
  -1  -8 -14 6671.50 500.114   9
  -1  -8 -15 78.6361 130.771   9
   1   8  15 88.5903 83.9746   2
  -1  -8 -15-36.1396 73.2085   6
   1   8  15-51.2361 65.4472   1
  -1  -8 -16 630.086 158.170   6
  -1  -8 -16 821.035 204.597   9
   1   8  16 765.659 135.876   1
   1   8  16 585.005 163.794   2
  -1  -8 -17 1668.69 285.706   9
   1   8  17 1880.90 286.204   2
  -1  -8 -17 1721.63 250.352   6
   1   8  17 2270.42 240.209   1
  -1  -8 -18 422.328 162.661   9
  -1  -8 -18 752.357 175.029   6
   1   8  18 634.018 171.102   2
   1   8  18 939.222 165.103   1
  -1  -8 -19 220.614 134.417   9
   1   8  19 183.123 110.570   2
   1   8  19 254.697 100.483   1
  -1  -8 -19 338.348 112.342   6
  -1  -8 -20 292.739 141.371   6
   1   8  20 406.999 167.459   2
  -1  -8 -20 98.0248 117.782   9
   1   8  20 406.263 122.187   1
  -1  -8 -21-128.469 132.815   9
  -1  -8 -21-125.056 104.224   6
   1   8  21 196.331 111.009   1
   1   8  21-167.695 139.245   2
   1   8  22 26.4906 122.419   2
  -1  -8 -22 70.7135 98.7160   6
  -1  -8 -22-206.697 169.582   9
   1   8  22 48.3471 68.9356   1
   1   8  23 110.895 79.7208   1
  -1  -8 -23 146.646 130.803   9
  -1  -8 -23 242.908 121.162   6
  -1  -8 -24 63.3323 99.1281   6
  -1  -8 -25 848.191 203.989   6
  -1  -9  20 299.568 106.034   1
   1   9 -20 344.620 161.034  10
   1   9 -19 196.696 125.731  10
  -1  -9  19 145.181 112.864   1
  -1  -9  18 432.140 152.900   1
   1   9 -18 712.339 208.427  10
  -1  -9  17 3700.75 364.883   1
   1   9 -17 4222.80 448.071  10
  -1  -9  16 354.083 125.705   1
   1   9 -16 323.412 155.617  10
   1   9 -16 316.732 102.182   4
   1   9 -15 2337.28 315.262  10
  -1  -9  15 2071.70 251.257   1
   1   9 -15 1995.28 213.188   4
   1   9 -14 826.997 197.390  10
   1   9 -14 702.564 125.645   4
  -1  -9  14 778.194 155.526   1
  -1  -9  13 9.34920 65.6310   1
   1   9 -13 50.6718 93.2518  10
   1   9 -13 66.0221 61.4013   4
   1   9 -12 1755.83 192.834   4
  -1  -9  12 1866.04 215.592   1
   1   9 -12 1307.25 234.298  10
   1   9 -11-40.3725 86.5818  10
  -1  -9  11 20.8241 65.9422   1
   1   9 -11-35.0407 71.6203   4
  -1  -9  10 138.633 72.2470   1
   1   9 -10 17.6212 74.4272  10
   1   9 -10 80.3341 67.2135   4
  -1  -9   9 245.527 86.8085   1
   1   9  -9 315.483 90.3924   4
  -1  -9   8 703.014 116.731   1
   1   9  -8 760.777 125.060   4
   1   9  -8 666.626 122.569   3
  -1  -9   7 790.586 117.906   1
   1   9  -7 712.600 117.484   3
   1   9  -7 607.380 62.2662   7
   1   9  -7 677.878 63.2357   5
  -1  -9   6 13829.8 494.808   1
   1   9  -6 11859.2 373.498   7
   1   9  -6 12086.9 365.145   5
   1   9  -6 14766.0 538.542   3
   1   9  -5 650.046 72.0951   5
  -1  -9   5 808.058 111.292   1
   1   9  -5 673.741 113.209   3
   1   9  -4 11994.4 397.524   5
  -1  -9   4 12207.1 433.454   1
   1   9  -4 13768.3 501.420   3
  -1  -9   3 367.514 71.5827   1
   1   9  -3 382.320 85.6455   3
   1   9  -3 318.252 68.6179   5
  -1  -9   2 10301.4 358.134   1
   1   9  -2 11207.9 438.527   3
  -1  -9   2 11346.7 442.228   3
  -1  -9   1 3347.60 178.961   8
  -1  -9   1 3053.80 242.950   6
   1   9  -1 3070.18 221.495   3
  -1  -9   1 2989.53 214.472   3
  -1  -9   1 3044.50 165.978   1
  -1  -9   0 135.782 40.4092   8
  -1  -9   0 141.131 63.2912   6
   1   9   0 102.015 56.7689   3
  -1  -9   0 100.875 34.9811   1
  -1  -9  -1 5110.97 213.957   8
  -1  -9  -1 4548.18 182.328   1
   1   9   1 5007.43 307.519   2
  -1  -9  -1 4633.54 302.746   6
   1   9   1 4829.15 282.667   3
   1   9   2-56.9415 76.8938   2
   1   9   2-20.4770 58.4976   3
  -1  -9  -2-26.6124 62.5953   6
  -1  -9  -2 8.97005 31.2362   8
  -1  -9  -3 710.818 130.790   6
  -1  -9  -3 1053.99 91.5648   8
   1   9   3 909.917 128.572   3
   1   9   3 856.452 137.847   2
   1   9   3 974.156 92.1079   8
  -1  -9  -4-54.6393 77.1609   9
   1   9   4 23.9491 29.1124   8
  -1  -9  -4 53.5649 22.2192   1
   1   9   4 43.9005 63.1723   2
  -1  -9  -4 21.2982 59.4836   6
  -1  -9  -4 42.7878 32.9593   8
  -1  -9  -5 15449.1 401.959   1
   1   9   5 16864.7 631.974   2
   1   9   5 17134.0 484.038   8
  -1  -9  -5 17806.2 665.368   9
  -1  -9  -5 15632.1 628.482   6
   1   9   6 2556.73 236.931   2
   1   9   6 2414.71 160.572   8
  -1  -9  -6 2733.08 260.740   9
  -1  -9  -6 2697.61 244.455   6
  -1  -9  -6 2493.60 126.572   1
  -1  -9  -7 24856.0 839.676   6
  -1  -9  -7 23311.0 580.671   1
  -1  -9  -7 23417.6 850.479   9
   1   9   7 25538.1 669.637   8
   1   9   7 23408.4 821.304   2
  -1  -9  -8 16.6159 60.3258   6
  -1  -9  -8 90.1142 32.8902   1
  -1  -9  -8-30.4386 86.1194   9
   1   9   8 86.7284 67.8723   2
  -1  -9  -9 7408.07 286.320   1
   1   9   9 6967.31 433.913   2
   1   9   9 7380.11 301.870   1
  -1  -9  -9 7740.26 460.023   9
  -1  -9  -9 7915.08 448.294   6
   1   9  10 427.008 77.1579   1
  -1  -9 -10 333.698 66.7271   1
  -1  -9 -10 489.065 141.521   9
  -1  -9 -10 241.800 106.142   6
   1   9  10 129.587 78.7418   2
  -1  -9 -11 60.2050 38.7451   1
   1   9  11 205.354 69.0402   1
  -1  -9 -11 85.2743 71.9970   6
  -1  -9 -11 155.342 97.7779   9
   1   9  11 158.590 85.7533   2
   1   9  12 1137.37 197.218   2
   1   9  12 1090.83 131.394   1
  -1  -9 -12 760.050 152.347   6
  -1  -9 -12 843.703 172.769   9
  -1  -9 -13 34.1588 84.0339   9
   1   9  13 115.553 102.996   2
   1   9  13 105.322 60.2824   1
  -1  -9 -13 133.087 82.6984   6
   1   9  14 692.793 125.180   1
   1   9  14 961.227 203.347   2
  -1  -9 -14 425.060 150.633   9
  -1  -9 -14 578.667 144.286   6
  -1  -9 -15 643.533 160.211   6
  -1  -9 -15 652.230 190.299   9
   1   9  15 805.903 131.848   1
   1   9  15 447.443 142.468   2
   1   9  16-37.8713 55.5879   1
  -1  -9 -16-175.176 124.589   9
  -1  -9 -16 64.1394 74.7336   6
   1   9  16-139.881 120.607   2
  -1  -9 -17 257.309 109.972   6
  -1  -9 -17 93.1351 98.4679   9
   1   9  17 210.923 118.654   2
   1   9  17 79.5081 64.1426   1
   1   9  18 3603.68 317.424   1
  -1  -9 -18 3177.33 345.717   6
  -1  -9 -18 2691.98 373.180   9
   1   9  18 3711.11 409.343   2
   1   9  19-104.206 82.2984   1
   1   9  19-67.8897 138.244   2
  -1  -9 -19 93.3486 106.964   9
  -1  -9 -19-108.901 117.845   6
  -1  -9 -20 763.094 178.158   6
  -1  -9 -20 1058.68 257.760   9
   1   9  20 951.747 179.648   1
   1   9  20 983.146 227.757   2
  -1  -9 -21-22.7828 81.8439   6
  -1  -9 -21-31.1625 114.901   9
   1   9  21 20.5660 75.8027   1
   1   9  21 15.4429 95.5474   2
   1   9  22-22.7103 119.681   2
  -1  -9 -22-81.2029 155.256   6
  -1  -9 -22 113.308 119.318   9
  -1  -9 -23-20.3576 123.636   6
  -1  -9 -24-72.5113 109.563   6
   1  10 -20-99.2141 124.073  10
  -1 -10  20 24.2788 82.4835   1
   1  10 -19 1166.12 266.685  10
  -1 -10  19 858.863 208.285   1
   1  10 -18 211.391 136.425  10
  -1 -10  18 372.843 129.911   1
  -1 -10  17 546.279 157.272   1
   1  10 -17 631.169 201.629  10
   1  10 -16 4664.88 343.309   4
   1  10 -16 4705.15 464.823  10
  -1 -10  16 4268.10 386.626   1
  -1 -10  15 25.4529 72.4919   1
   1  10 -15-46.0090 97.8375  10
   1  10 -15 0.59531 60.2994   4
   1  10 -14 119.754 120.255  10
  -1 -10  14 237.914 86.3727   1
   1  10 -14 124.960 66.4136   4
  -1 -10  13 102.197 66.1587   1
   1  10 -13 180.180 80.9929   4
   1  10 -13 124.858 110.116  10
  -1 -10  12 1009.52 167.467   1
   1  10 -12 899.321 150.587   4
   1  10 -12 913.625 205.793  10
   1  10 -11 77.3087 73.7846   4
  -1 -10  11 43.4269 68.4932   1
   1  10 -11-76.1115 97.7058  10
   1  10 -10-75.9946 92.6292  10
   1  10 -10 167.038 85.0018   4
  -1 -10  10 137.571 74.3518   1
   1  10  -9 222.723 85.9058   4
  -1 -10   9 73.8384 75.2338   1
  -1 -10   8 1065.16 145.295   1
   1  10  -8 1435.53 176.094   3
   1  10  -8 744.751 60.4150   7
   1  10  -8 1217.74 164.292   4
   1  10  -8 804.458 61.7206   5
   1  10  -7 2643.99 142.065   5
  -1 -10   7 3021.36 228.190   1
   1  10  -7 2906.30 150.579   7
   1  10  -7 3643.00 271.600   3
   1  10  -6 3276.91 172.660   5
   1  10  -6 3596.87 263.682   3
  -1 -10   6 3295.71 232.503   1
  -1 -10   5 13251.9 486.326   1
   1  10  -5 15958.7 567.852   3
   1  10  -5 12311.1 415.309   5
   1  10  -4 2088.97 193.369   3
   1  10  -4 1764.61 140.843   5
  -1 -10   4 1973.88 158.684   1
   1  10  -3 3649.25 220.115   5
  -1 -10   3 4032.94 219.372   1
   1  10  -3 4295.98 273.978   3
   1  10  -2 2835.28 222.035   3
  -1 -10   2 2825.73 174.195   1
  -1 -10   1 87.3313 35.6610   1
  -1 -10   1 66.1122 39.5454   8
  -1 -10   1 72.3676 55.1864   6
   1  10  -1 167.813 62.1501   3
  -1 -10   0 608.914 72.7148   1
   1  10   0 608.553 100.923   3
  -1 -10   0 511.021 109.900   6
  -1 -10   0 631.109 76.3967   8
  -1 -10  -1 955.934 84.1613   1
   1  10   1 1061.26 141.970   3
  -1 -10  -1 739.523 130.736   6
  -1 -10  -1 1047.02 98.2824   8
  -1 -10  -2-10.7200 54.4412   6
   1  10   2-30.2305 66.0843   2
  -1 -10  -2-16.6338 24.2581   1
   1  10   2-103.276 75.5393   3
  -1 -10  -2-34.9150 32.8505   8
   1  10   3 487.249 118.693   2
  -1 -10  -3 451.658 65.8037   8
   1  10   3 448.251 102.540   3
  -1 -10  -3 541.437 120.283   6
  -1 -10  -4 1859.41 123.739   8
   1  10   4 1734.18 181.807   3
   1  10   4 1636.74 194.187   2
   1  10   4 1751.85 129.493   8
  -1 -10  -4 1414.36 91.4558   1
  -1 -10  -4 1573.10 194.939   9
  -1 -10  -4 1579.16 194.472   6
  -1 -10  -5-187.985 90.3784   9
  -1 -10  -5-17.7804 27.6567   1
   1  10   5 16.0378 30.9176   8
  -1 -10  -5-56.2655 79.2504   6
   1  10   5-24.4805 65.5156   2
  -1 -10  -6 19639.2 746.256   9
   1  10   6 19178.3 723.238   2
   1  10   6 19059.9 546.609   8
  -1 -10  -6 17370.3 706.890   6
  -1 -10  -6 18091.8 458.413   1
  -1 -10  -7 1206.49 173.077   6
  -1 -10  -7 1079.49 172.516   9
   1  10   7 1161.48 115.151   8
   1  10   7 1218.74 181.154   2
  -1 -10  -7 1142.17 90.0741   1
  -1 -10  -8 11700.3 358.533   1
  -1 -10  -8 11780.2 597.615   9
  -1 -10  -8 11095.0 559.706   6
   1  10   8 11662.9 565.852   2
  -1 -10  -9 4425.22 209.650   1
  -1 -10  -9 4603.14 352.033   6
   1  10   9 4599.78 361.637   2
  -1 -10  -9 4082.50 360.780   9
  -1 -10 -10 1109.79 194.516   9
  -1 -10 -10 1549.24 204.781   6
  -1 -10 -10 1264.76 114.626   1
   1  10  10 1422.33 214.831   2
  -1 -10 -11 602.855 153.292   9
  -1 -10 -11 479.608 127.788   6
   1  10  11 488.546 80.2288   1
   1  10  11 457.402 134.316   2
  -1 -10 -11 379.914 71.1418   1
  -1 -10 -12 2069.85 278.643   9
   1  10  12 2415.48 191.571   1
  -1 -10 -12 2178.77 261.380   6
   1  10  12 2024.34 262.674   2
  -1 -10 -13-126.906 126.691   9
   1  10  13 146.769 104.494   2
  -1 -10 -13 8.36392 76.6649   6
   1  10  13-10.4249 50.4008   1
  -1 -10 -14 71.3249 106.823   9
   1  10  14 468.926 140.086   2
  -1 -10 -14 423.228 121.763   6
   1  10  14 315.197 83.6133   1
  -1 -10 -15 395.494 131.550   6
  -1 -10 -15 20.0707 106.119   9
   1  10  15 363.702 133.371   2
   1  10  15 501.345 110.909   1
  -1 -10 -16 36.3653 114.276   6
   1  10  16 185.471 69.7307   1
   1  10  16 301.086 154.427   2
  -1 -10 -16 179.908 110.853   9
   1  10  17 2943.67 275.556   1
  -1 -10 -17 2893.07 369.063   9
  -1 -10 -17 2763.84 319.987   6
   1  10  17 3686.50 395.117   2
   1  10  18 155.606 97.1101   2
   1  10  18 134.552 77.6836   1
  -1 -10 -18 93.7907 129.235   9
  -1 -10 -18 3.32299 105.252   6
   1  10  19 1615.69 283.745   2
  -1 -10 -19 1152.08 219.175   6
  -1 -10 -19 1678.06 322.092   9
  -1 -10 -20 1422.78 290.665   9
  -1 -10 -20 534.523 167.635   6
   1  10  20 941.499 232.972   2
  -1 -10 -21 954.386 260.089   9
   1  10  21 1086.58 260.301   2
  -1 -10 -21 849.381 194.362   6
   1  10  22-17.8623 123.675   2
  -1 -10 -22 80.6287 100.058   6
  -1 -10 -22 122.339 159.777   9
  -1 -10 -23-297.619 167.986   6
  -1 -11  19 157.576 115.881   1
   1  11 -19 256.246 172.430  10
  -1 -11  18 2226.67 295.516   1
   1  11 -18 2911.63 397.882  10
   1  11 -17 766.372 220.909  10
  -1 -11  17 832.223 177.768   1
  -1 -11  16 560.590 142.950   1
   1  11 -16 683.546 157.487   4
   1  11 -16 823.434 219.762  10
   1  11 -15 1320.51 251.794  10
  -1 -11  15 1290.99 210.954   1
   1  11 -15 1493.87 213.164   4
  -1 -11  14-125.575 95.1605   1
   1  11 -14-19.5675 65.6370   4
   1  11 -14-133.564 101.652  10
   1  11 -13 442.333 117.112   4
  -1 -11  13 296.889 112.632   1
   1  11 -13 439.831 154.530  10
   1  11 -12 1279.06 181.477   4
   1  11 -12 1521.03 268.563  10
  -1 -11  12 1563.74 208.078   1
  -1 -11  11 592.117 131.835   1
   1  11 -11 655.026 144.819   4
   1  11 -11 699.153 172.089  10
  -1 -11  10 1505.05 188.397   1
   1  11 -10 1661.93 252.402  10
   1  11 -10 1530.58 199.134   4
   1  11  -9 526.021 124.756   4
  -1 -11   9 397.456 106.296   1
   1  11  -8 154.239 33.1764   5
  -1 -11   8 329.897 84.8727   1
   1  11  -8 85.5370 27.7709   7
   1  11  -8 298.692 98.6416   4
   1  11  -8 174.449 89.4294   3
   1  11  -8 156.449 31.1152   7
   1  11  -7 7810.04 411.820   3
   1  11  -7 5261.92 212.279   7
   1  11  -7 5684.21 237.141   5
   1  11  -7 5678.33 243.142   7
  -1 -11   7 6571.46 355.889   1
   1  11  -7 7784.58 425.219   4
  -1 -11   6 549.756 109.365   1
   1  11  -6 666.314 79.8718   5
   1  11  -6 793.528 133.223   3
   1  11  -5 3930.33 218.590   5
   1  11  -5 4591.26 303.344   3
  -1 -11   5 4225.52 259.743   1
   1  11  -4 2671.07 185.168   5
   1  11  -4 2936.14 239.626   3
  -1 -11   4 2800.39 198.370   1
   1  11  -3 1666.75 153.990   5
   1  11  -3 2314.00 207.146   3
  -1 -11   3 2125.16 161.111   1
  -1 -11   2 378.686 70.1645   8
   1  11  -2 324.395 89.7293   3
  -1 -11   2 254.405 62.1671   1
  -1 -11   1 64.6199 42.6516   1
  -1 -11   1-32.4497 60.4948   6
  -1 -11   1-25.4002 36.0706   8
   1  11  -1 16.2762 53.6357   3
  -1 -11   0 1.67548 27.7156   1
   1  11   0 28.3514 50.8762   3
  -1 -11   0 14.9769 59.4459   6
  -1 -11   0 18.4983 33.1131   8
  -1 -11  -1 2201.31 144.292   8
  -1 -11  -1 1832.08 212.352   6
   1  11   1 2341.67 210.441   3
  -1 -11  -1 1797.87 120.030   1
  -1 -11  -2 108.268 89.3029   6
  -1 -11  -2 42.4796 27.7478   1
  -1 -11  -2-12.0130 35.1125   8
   1  11   2-60.1919 71.8106   3
   1  11   2 83.7979 80.9349   2
   1  11   3 2497.13 240.168   2
  -1 -11  -3 2434.23 148.813   8
  -1 -11  -3 2700.55 257.625   6
   1  11   3 2528.02 224.367   3
   1  11   4 1334.27 117.880   8
   1  11   4 1318.96 165.997   3
  -1 -11  -4 1391.22 187.423   6
  -1 -11  -4 963.112 77.8010   1
   1  11   4 1514.40 198.967   2
  -1 -11  -4 1562.08 116.702   8
  -1 -11  -4 1209.61 186.481   9
   1  11   5 1215.14 113.969   8
   1  11   5 1111.18 155.298   3
  -1 -11  -5 840.259 148.162   6
  -1 -11  -5 838.741 69.5099   1
   1  11   5 1057.31 173.039   2
  -1 -11  -5 1058.64 169.175   9
  -1 -11  -6 787.063 153.904   6
  -1 -11  -6 731.384 150.257   9
   1  11   6 1036.00 175.737   2
   1  11   6 868.820 101.305   8
  -1 -11  -6 799.493 69.0589   1
   1  11   7 3420.95 203.814   8
   1  11   7 3301.35 301.311   2
  -1 -11  -7 3152.86 303.363   9
  -1 -11  -7 2948.38 147.700   1
  -1 -11  -7 3302.72 300.180   6
  -1 -11  -8 4516.50 197.186   1
   1  11   8 5064.76 374.505   2
  -1 -11  -8 4614.79 383.969   9
  -1 -11  -8 4915.54 368.499   6
  -1 -11  -9-37.6557 82.9829   6
  -1 -11  -9-17.5508 83.1150   9
  -1 -11  -9 51.1936 32.3090   1
   1  11   9 84.4655 90.1431   2
  -1 -11 -10 1471.75 213.573   6
  -1 -11 -10 1217.50 110.543   1
   1  11  10 1409.89 209.456   2
  -1 -11 -10 1239.38 214.096   9
  -1 -11 -11 20.5326 84.8290   9
   1  11  11-14.1527 95.3545   2
  -1 -11 -11 124.522 102.440   6
  -1 -11 -11-18.2747 41.1579   1
  -1 -11 -12 2687.10 298.681   6
  -1 -11 -12 2387.88 305.384   9
   1  11  12 2710.13 306.452   2
  -1 -11 -13 240.942 120.518   6
  -1 -11 -13 12.3470 87.4821   9
   1  11  13-38.1545 115.728   2
   1  11  14 2059.47 281.494   2
   1  11  14 2709.56 220.725   1
  -1 -11 -14 2122.05 303.550   9
  -1 -11 -14 2691.91 313.280   6
   1  11  15 75.6026 53.7778   1
  -1 -11 -15 122.657 106.125   6
   1  11  15-37.5147 106.592   2
[truncated: 2,798,828 more chars]
